# Supplementary material for: Phosphoprotein SAK1 is a regulator of acclimation to singlet oxygen in Chlamydomonas reinhardtii
Source: eLife journal article supplement (doi:10.7554/elife.02286), 2014-05-23
Supplement: supp [file elife-02286-supp-v1.zip]

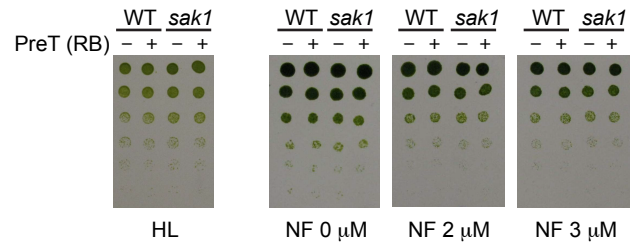

Figure 1-figure supplement 1 Pretreatment with RB does not increase resistance to high light or norflurazon in cells grown on plates

Cells were pretreated with 1  $\mu$ M RB with (+) or without (-) light, then spotted on minimal plates and grown under high light (HL) or grown photoheterotrophically on TAP plates containing norflurazon (NF) and grown under low light for 4 days. Cells were spotted in serial dilutions.
