# Supplementary material for: Phosphoprotein SAK1 is a regulator of acclimation to singlet oxygen in Chlamydomonas reinhardtii
Source: eLife journal article supplement (doi:10.7554/elife.02286), 2014-05-23
Supplement: supp [file elife-02286-supp-v1.zip]

Archive with 9 entries (9 files):
- elife_poa_e02286_Figure_3_figure_supplement_1_Enriched_functional_classes_among_differentially_expressed_genes_in_sak1_during_1O2_acclimation.zip
- elife_poa_e02286_Figure_5_figure_supplement_2_Multiple_sequence_alignment_of_SAK1_domains.pdf
- elife_poa_e02286_Figure_3_figure_supplement_2_Enriched_functional_classes_among_differentially_expressed_genes_in_sak1_at_basal_level.xlsx
- elife_poa_e02286_Supplementary_file_1.xlsx
- elife_poa_e02286_Figure_5_figure_supplement_4_Prediction_of_phosphorylation_sites_in_SAK1.pdf
- elife_poa_e02286_Figure_5_figure_supplement_1_SAK1_domain_containing_proteins_in_chlorophytes.zip
- elife_poa_e02286_Figure_2_figure_supplement_1_Fold_change_(FC)_values_obtained_by_RNA_seq_and_qRT_PCR.xlsx
- elife_poa_e02286_Figure_5_figure_supplement_3_Secondary_structure_prediction_of_SAK1_domain.pdf
- elife_poa_e02286_Figure_1_figure_supplement_1_Pretreatment_with_RB_does_not_increase_resistance_to_high_light_or_norflurazon_in_cells_grown_on_plates.pdf
