# Supplementary material for: Phosphoprotein SAK1 is a regulator of acclimation to singlet oxygen in Chlamydomonas reinhardtii
Source: eLife journal article supplement (doi:10.7554/elife.02286), 2014-05-23
Supplement: supp [file elife-02286-supp-v1.zip › elife_poa_e02286_Figure_3_figure_supplement_2_Enriched_functional_classes_among_differentially_expressed_genes_in_sak1_at_basal_level.xlsx]

## Sheet: Sheet1
Figure 3-figure supplement 2 Enriched functional classes among differentially expressed genes in sak1 at basal level
Primary Mapman class	Secondary Mapman class	Gene ID (v4)	Gene name	Annotation
Elevated in sak1
nucleotide metabolism	deoxynucleotide metabolism	Cre12.g491050.t1.1	RIR2	Ribonucleotide reductase (RNR), small subunit.
		Cre12.g492950.t1.1	RIR1	Ribonucleotide reductase (RNR), large subunit, class I
		Cre16.g667850.t1.1		dUTP pyrophosphatase
	phosphotransfer and pyrophosphatases	Cre02.g122450.t1.1		NFa
		Cre02.g093950.t1.1	PYR5	Uridine 5'- monophosphate synthase/orotate phosphoribosyltransferase
		Cre12.g519950.t1.1		Flagellar Associated Protein similar to adenylate/guanylate kinases
		Cre26.g772450.t1.1		NFa
	synthesis	Cre65.g793400.t1.1		NFa
		Cre02.g079700.t1.1	PYR2	Aspartate carbamoyltransferase
		Cre01.g048950.t1.1		dUTP pyrophosphatase
		Cre07.g318750.t1.1		Phosphoribosylformylglycinamidine cyclo-ligase.
DNA	repair	Cre07.g314650.t1.1		Chloroplast RecA recombination protein
	synthesis/chromatin structure	Cre04.g214350.t1.2		Eukaryotic DNA polymerase alpha, catalytic subunit
		Cre07.g314900.t1.2		ATP-dependent RNA helicase (DEAD/DEAH)
		Cre04.g223850.t1.1		Cytoplasmic DExD/H-box RNA helicase
		Cre01.g015250.t1.1		Eukaryotic DNA polymerase delta, catalytic subunit.
		Cre07.g342506.t1.1		Ubiquitin-protein ligase
		Cre07.g338000.t1.1	MCM2	Minichromosome maintenance protein
		Cre03.g178650.t1.1	MCM6	MCM6 DNA replication protein
		Cre07.g312350.t1.2		DNA polymerase alpha, primase subunit
		Cre01.g009250.t1.2	TOP2	DNA topoisomerase II
		Cre26.g772150.t1.1		NFa
		Cre07.g316850.t1.1	MCM4	Minichromosome maintenance protein 4
		Cre06.g263800.t1.2		tRNA-splicing endonuclease positive effector (SEN1)
		Cre06.g295700.t1.2	MCM3	Minichromosome maintenance protein
		Cre06.g251800.t1.1	RFC4	DNA replication factor C complex subunit 4
	unspecified	Cre07.g322300.t1.2		DNA repair helicase of the DEAD superfamily
		Cre17.g718100.t1.1		Phosphatidylinositol transfer protein SEC14 and related proteins (CRAL/TRIO)
tetrapyrrole synthesis	Glu-tRNA reductase	Cre07.g342150.t1.1	HEM1	Glutamyl-tRNA reductase
	Glu-tRNA synthetase	Cre44.g788000.t1.1		Glutamyl-tRNA reductase
		Cre06.g306300.t1.1	CHLI1	Magnesium chelatase subunit I
	magnesium chelatase	Cre07.g325500.t1.1		Magnesium chelatase subunit H
	protochlorophyllide reductase	Cre01.g015350.t1.1	POR1	Light-dependent protochlorophyllide reductase
photosynthesis	Calvin-Benson cycle	Cre05.g234550.t1.1		Fructose-biphosphate aldolase
	light reaction	Cre07.g330250.t1.1	PSAH	Subunit H of photosystem I
		Cre07.g334550.t1.1		Photosystem I subunit PsaO
		Cre06.g261000.t1.1	PSBR	10 kDa photosystem II polypeptide
	photorespiration	Cre12.g542300.t1.1	GYK1	Glycerate kinase
		Cre06.g253350.t1.1	GCSH	Glycine cleavage system, H-protein
		Cre06.g293950.t1.1	SHMT2	Serine hydroxymethyltransferase 2
transport	ABC transporters and multidrug resistance systems	Cre04.g222700.t1.1		ATPase component of ABC transporters with duplicated ATPase domains/Translation elongation factor EF-3b
		Cre17.g728400.t1.2		ABCtransporter (ABC-2 type)
		Cre05.g241350.t1.2		ABCtransporter (ABC-2 type)
		Cre03.g169300.t1.1		ABCtransporter (ABC-2 type)
		Cre11.g474600.t1.1		NFa
	amino acids	Cre04.g226150.t1.2	AOC1	Amino acid carrier 1; belongs to APC (Amino acid Polyamine organo Cation) family
	calcium	Cre09.g388850.t1.1	ACA1	P-type ATPase/cation transporter, plasma membrane
	metabolite transporters at the envelope membrane	Cre06.g263850.t1.2	TPT2	Triose phosphate/phosphate translocator
	metabolite transporters at the mitochondrial membrane	Cre10.g449100.t1.1		Mitochondrial oxodicarboxylate carrier protein
		Cre01.g069350.t1.1		NFa
		Cre15.g641200.t1.1		Mitochondrial fatty acid anion carrier protein/Uncoupling protein
		Cre09.g396350.t1.1		Mitochondrial carrier protein PET8
	misc	Cre06.g311000.t1.2	FBT2	Folate transporte
		Cre17.g718100.t1.1		Phosphatidylinositol transfer protein SEC14 and related proteins (CRAL/TRIO)
	phosphate	Cre16.g686750.t1.1	PTA3	Proton/phosphate symporter
		Cre16.g675300.t1.2		Sodium-dependent phosphate transporter, major facilitator superfamily
	potassium	Cre12.g553450.t1.2		NFa
	sulphate	Cre17.g723350.t1.1	SUL2	Sulfate anion transporter
	unspecified cations	Cre13.g573900.t1.1		Na+:iodide/myo-inositol/multivitamin symporters
	sugars	Cre16.g675300.t1.2		Sodium-dependent phosphate transporter, major facilitator superfamily
RNA	processing	Cre10.g427700.t1.1		ATP-dependent RNA helicase, DEAD/DEAH box helicase
		Cre12.g538750.t1.1	LSM1	U6 snRNA-associated Sm-like protein LSm1, RNA cap binding; (SMP6d)
		Cre10.g433750.t1.2	PAP1	Nuclear poly(A) polymerase
		Cre03.g182950.t1.1		NFa
		Cre08.g375128.t1.1		NFa
	regulation of transcription	Cre17.g728200.t1.2		YL-1 protein (transcription factor-like 1)
		Cre06.g275500.t1.1		AP2 Transcription factor
		Cre28.g777500.t1.2		NFa
		Cre13.g572450.t1.1		Response regulator receiver domain (sensor histidine kinase-related, regulation of transcription)
		Cre14.g620500.t1.1		AP2 Transcription factor
		Cre16.g673150.t1.1		Histone deacetylase complex, catalytic component RPD3
		Cre02.g078700.t1.2		DNA damage-responsive repressor GIS1/RPH1, jumonji superfamily
		Cre03.g198800.t1.1		Myb-like DNA-binding domain
		Cre04.g218050.t1.2		RWP-RK domain
		Cre07.g324400.t1.1	VPS24	Subunit of the ESCRT-III complex, vaculoar sortin protein
		Cre11.g481050.t1.1		SWI/SNF-related chromatin binding protein
		Cre02.g101950.t1.1	TMU2	tRNA (uracil-5)-methyltransferase
		Cre10.g459600.t1.2		CAATT-binding transcription factor/60S ribosomal subunit biogenesis protein
		Cre01.g018650.t1.2		NFa
		Cre01.g012200.t1.2		NFa
		Cre02.g129750.t1.1		NFa
		Cre10.g461750.t1.2		DNA (cytosine-5-)-methyltransferase
		Cre01.g004600.t1.2	RWP12	Putative RWP-RK domain transcription factor
		Cre09.g400100.t1.1		Predicted Zn-finger protein, zinc and DNA binding domains
		Cre07.g335150.t1.2		SBP domain
	RNA binding	Cre16.g662700.t1.1		NFa
		Cre07.g330300.t1.1		RNA-binding protein musashi/mRNA cleavage and polyadenylation factor I complex, subunit HRP1
		Cre06.g275100.t1.1		RNA-binding protein musashi/mRNA cleavage and polyadenylation factor I complex, subunit HRP1
	transcription	Cre07.g322200.t1.1		NFa
Repressed in sak1
transport	ABC transporters and multidrug resistance systems	Cre02.g097800.t1.2		ABC transporter (MDR)
		Cre17.g725200.t1.1		ABC transporter, peptide exporter
		Cre13.g580300.t1.1		ABC transporter family protein
		Cre10.g439000.t1.2		Long-chain acyl-CoA transporter, ABC superfamily (involved in peroxisome organization and biogenesis)
	amino acids	Cre06.g292350.t1.1	AOC4	Amino acid carrier
	calcium	Cre06.g263950.t1.2		Sodium/potassium-transporting ATPase subunit alpha
		Cre16.g681750.t1.2		Calcium transporting ATPase
	metabolite transporters at the mitochondrial membrane	Cre03.g172300.t1.1		Mitochondrial phosphate carrier protein
		Cre09.g394800.t1.2		Mitochondrial substrate carrier protein
	metal	Cre03.g189550.t1.2	ZIP3	Zinc transporter, ZIP family
		Cre11.g479600.t1.2		Sodium/calcium exchanger NCX1 and related proteins
		Cre06.g281900.t1.1	ZIP7	Zinc transporter and related ZIP domain-containing proteins
	misc	Cre02.g089900.t1.1		Secretory carrier membrane protein
		Cre10.g448050.t1.1		Retinaldehyde binding protein-related (CRAL/TRIO domain)
		Cre03.g177750.t1.2		Multidrug resistance pump
	NDP-sugars at the ER	Cre02.g112900.t1.1		GDP-fucose transporter (Triose-phosphate transporter family)
	P- and V-ATPases	Cre01.g027800.t1.1	ATPvH	Vacuolar ATP synthase subunit H
		Cre10.g446550.t1.1	ATPvF	Vacuolar ATP synthase subunit F
		Cre03.g176250.t1.1	ATPvD1	Vacuolar ATP synthase subunit D
		Cre06.g250250.t1.1	ATPvC	Vacuolar ATP synthase subunit C
		Cre10.g459200.t1.1	ACA4	P-type ATPase/cation transporter, plasma membrane (Low CO2 inducible gene)
	phosphate	Cre12.g515750.t1.2		Sodium-dependent phosphate transporter-related
		Cre08.g379550.t1.2		Sodium-dependent phosphate transporter, major facilitator superfamily
		Cre12.g489400.t1.1	PTB7	Putative phosphate transporter, sodium/phosphate transporter
		Cre02.g144650.t1.1	PTB12	Sodium/phosphate symporter
	unspecified anions	Cre09.g404100.t1.1		Cl- channel CLC-7 and related proteins (CLC superfamily)
		Cre17.g729450.t1.1		Cl- channel CLC-7 and related proteins (CLC superfamily)
		Cre01.g037150.t1.2		Voltage-gated chloride channel activity
	sugars	Cre03.g206800.t1.2	HXT1	Hexose transporter
	P- and V-ATPases	Cre03.g176250.t1.1	ATPvD1	Vacuolar ATP synthase subunit D
		Cre10.g446550.t1.1	ATPvF	Vacuolar ATP synthase subunit F
		Cre01.g027800.t1.1	ATPvH	Vacuolar ATP synthase subunit H
mitochondrial electron transport / ATP synthesis	cytochrome c reductase	Cre01.g051900.t1.1	RIP1	Rieske iron-sulfur protein of mitochondrial ubiquinol-cytochrome c reductase (complex III)
		Cre06.g262700.t1.2		Ubiquinol cytochrome c reductase, subunit 7
	F1-ATPase	Cre02.g116750.t1.2		F0F1-type ATP synthase, alpha subunit
		Cre01.g018800.t1.1	ATP6	Mitochondrial F1F0 ATP synthase subunit 6
		Cre10.g420700.t1.1		Mitochondrial F1F0-ATP synthase, subunit epsilon/ATP15
		Cre16.g680000.t1.1	ATP5	Mitochondrial ATP synthase subunit 5, OSCP subunit
	NADH-DH	Cre10.g434450.t1.1	NUOA9	Putative NADH:ubiquinone oxidoreductase (Complex I) 39 kDa subunit
		Cre08.g378900.t1.1	NUO3	NADH:ubiquinone oxidoreductase ND3 subunit
		Cre10.g450400.t1.1	NUO5	NADH:ubiquinone oxidoreductase (Complex I) 24 kD subunit
lipid metabolism	'exotics' (steroids, squalene etc)	Cre14.g615050.t1.1		3-oxo-5-alpha-steroid 4-dehydrogenase, Steroid reductase required for elongation of the VLCFAs (enoyl reductase)
		Cre12.g530550.t1.2	KDG2	Diacylglycerol kinase, sphingosine kinase
		Cre02.g137850.t1.1		NFa
	FA desaturation	Cre17.g711150.t1.1		Omega-6 fatty acid desaturase (delta-12 desaturase)
	glyceral metabolism	Cre13.g577450.t1.2		Glycerol-3-phosphate dehydrogenase
	glycolipid synthesis	Cre13.g583600.t1.1	DGD1	Digalactosyldiacylglycerol synthase
		Cre16.g656400.t1.1	SQD1	UDP-sulfoquinovose synthase
	lipid degradation	Cre06.g252801.t1.2		CGI-141-related/lipase containing protein (TAG lipase)
		Cre03.g164350.t1.2		Lysophospholipase, putative drug exporter of the RND superfamily
	phospholipid synthesis	Cre06.g281250.t1.1	CFA1	Cyclopropane fatty acid synthase
		Cre09.g398700.t1.1	CFA2	Cyclopropane fatty acid synthase
		Cre11.g472700.t1.1		NFa
		Cre06.g262550.t1.1		Zinc finger MYND domain containing protein 10
photosynthesis	Calvin-Benson cycle	Cre12.g511900.t1.1	RPE1	Ribulose phosphate-3-epimerase
		Cre02.g120100.t1.1	RBCS1	Ribulose-1,5-bisphosphate carboxylase/oxygenase small subunit 1
	light reaction	Cre05.g243800.t1.1	CPLD45	Photosystem II Psb27 protein
		Cre10.g420350.t1.1	PSAE	Photosystem I reaction center subunit IV
		Cre01.g071450.t1.2		NFa
		Cre06.g291650.t1.1		Ferredoxin
		Cre05.g242400.t1.1		No functional annotation
	photorespiration	Cre09.g411900.t1.2	SHMT3	Serine hydroxymethyltransferase 3
		Cre06.g295450.t1.1	HPR1	Hydroxypyruvate reductase
major CHO metabolism	degradation	Cre09.g415600.t1.2		Starch binding domain
		Cre11.g473500.t1.2		NFa
		Cre09.g415600.t1.2		Starch binding domain
	synthesis	Cre06.g289850.t1.2	SBE1	Starch Branching Enzyme
		Cre17.g721500.t1.1		Granule-bound starch synthase I
misc	acid and other phosphatases	Cre13.g568600.t1.2		Multiple inositol polyphosphate phosphatase-related, Acid phosphatase activity
	alcohol dehydrogenases	Cre13.g569350.t1.1		Sterol dehydrogenase-related, Flavonol reductase/cinnamoyl-CoA reductase
	cytochrome P450	Cre07.g356250.t1.2		Cytochrome P450 CYP4/CYP19/CYP26 subfamilies, beta-carotene 15,15'-monooxygenase
		Cre07.g356250.t1.2		Cytochrome P450 CYP4/CYP19/CYP26 subfamilies, beta-carotene 15,15'-monooxygenase
	dynamin	Cre17.g724150.t1.1	DRP3	Dynamin-related GTPase
	GCN5-related N-acetyltransferase	Cre16.g657150.t1.2		N-acetyltransferase activity (GNAT) family
	gluco-, galacto- and mannosidases	Cre03.g171050.t1.2	GHL1	Glycosyl hydrolase
	misc2	Cre14.g614100.t1.1	GTR26	Dolichyl-diphosphooligosaccharide-protein glycosyltransferase
	rhodanese	Cre07.g352550.t1.1	RDP3	Putative rhodanese domain phosphatase
	short chain dehydrogenase/reductase (SDR)	Cre07.g352450.t1.1		Corticosteroid 11-beta-dehydrogenase and related short chain-type dehydrogenases, 3-hydroxybutyrate dehydrogenase
		Cre12.g559350.t1.1		1-Acyl dihydroxyacetone phosphate reductase and related dehydrogenases
		Cre03.g191850.t1.1		Short chain dehydrogenase
	UDP glucosyl and glucoronyl transferases	Cre11.g474450.t1.1		NFa
		Cre03.g205250.t1.2	ELG4	Exostosin-like glycosyltransferase
		Cre16.g659500.t1.1		Lactosylceramide 4-alpha-galactosyltransferase
		Cre11.g483400.t1.2	ELG10	Exostosin-like glycosyltransferase
tetrapyrrole synthesis	Glu-tRNA synthetase	Cre12.g510800.t1.1	CHLI2	Magnesium-chelatase subunit chlI
	magnesium protoporphyrin IX methyltransferase	Cre12.g498550.t1.2		Magnesium protoporphyrin IX S-adenosyl methionine O-methyl transferase (Magnesium-protoporphyrin IX methyltransferase) (PPMT)
	unspecified	Cre12.g516350.t1.1	COX10	Cytochrome c oxidase assembly protein Cox10
	urogen III methylase	Cre02.g133050.t1.2		NFa
a Corresponding gene model was not found in v5
