# Supplementary material for: Phosphoprotein SAK1 is a regulator of acclimation to singlet oxygen in Chlamydomonas reinhardtii
Source: eLife journal article supplement (doi:10.7554/elife.02286), 2014-05-23
Supplement: supp [file elife-02286-supp-v1.zip › elife_poa_e02286_Figure_5_figure_supplement_3_Secondary_structure_prediction_of_SAK1_domain.pdf]

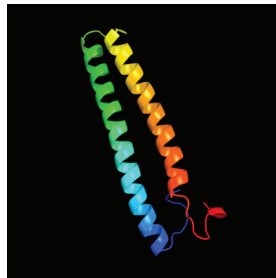

Figure Supplement 3 Secondary structure prediction of SAK1 domain  
SAK1 domain modeled against its best-hit nickel cobalt resistance protein cnrr by PHYRE. 44% (coverage) of the SAK1 domain was aligned with 73.6% confidence.

Figure 5-figure supplement 3 Wakao et al (2014)
