# Supplementary material for: Phosphoprotein SAK1 is a regulator of acclimation to singlet oxygen in Chlamydomonas reinhardtii
Source: eLife journal article supplement (doi:10.7554/elife.02286), 2014-05-23
Supplement: supp [file elife-02286-supp-v1.zip › elife_poa_e02286_Figure_5_figure_supplement_4_Prediction_of_phosphorylation_sites_in_SAK1.pdf]

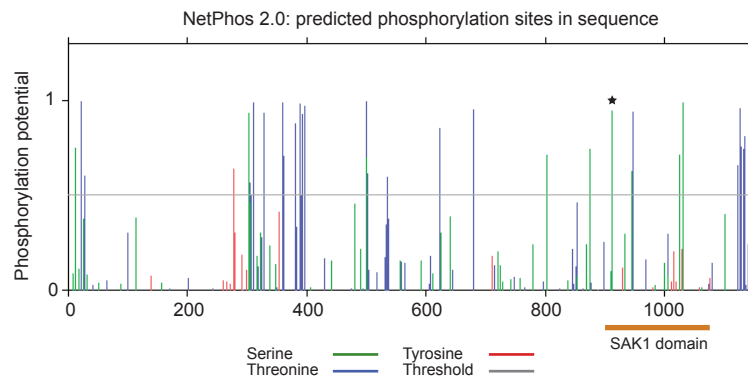

Figure 5-figure supplement 4 Prediction of phosphorylation sites in SAK1

Prediction of phosphorylation sites by NetPhos 2.0. Orange bar indicates the position of SAK1 domain, star indicates a relatively conserved residue among the 37 members containing the SAK1 domain.

Figure 5-figure supplement 4 Wakao et al (2014)
