# Supplementary material for: Phosphoprotein SAK1 is a regulator of acclimation to singlet oxygen in Chlamydomonas reinhardtii
Source: eLife journal article supplement (doi:10.7554/elife.02286), 2014-05-23
Supplement: supp [file elife-02286-supp-v1.zip › elife_poa_e02286_Supplementary_file_1.xlsx]

## Sheet: RawCounts
	KNSW4ARBMTS1	KNSW4ARBMTS2	KNSW4ARBPTS1	KNSW4ARBPTS2	KNSWs1RBMTS1	KNSWs1RBMTS2	KNSWs1RBPTS1	KNSWs1RBPTS2
Cre01.g000050.t1.2	1.17884	1.14846	0.720561	0.602865	1.39088	0.971098	0.732335	0.636183
Cre01.g000100.t1.2	0.451167	0.473349	0.25456	0.155298	0.614212	0.750466	0.15092	0.18153
Cre01.g000150.t1.1	3.4459	2.85974	6.31886	6.45342	4.0657	4.36047	3.60748	4.28353
Cre01.g000200.t1.2	4.73445	4.22805	4.97391	4.32541	4.2768	3.66854	3.86032	1.89171
Cre01.g000250.t1.1	11.9163	14.6727	21.6996	22.2179	18.0139	17.4649	41.0238	40.8317
Cre01.g000300.t1.2	17.4809	14.6849	112.386	108.951	16.4878	17.5649	92.4962	94.9039
Cre01.g000350.t1.2	148.659	144.267	148.771	159.103	68.8254	70.5887	87.4722	79.6617
Cre01.g000400.t1.1	6.06157	6.04593	5.293	5.42485	6.38558	6.2417	5.14638	6.0392
Cre01.g000450.t1.1	5.76212	5.6136	5.39551	3.62077	6.18378	5.62028	3.62532	4.06135
Cre01.g000500.t1.2	0.928091	1.80834	0.531836	0.415301	1.84785	1.1038	0.605389	0.505677
Cre01.g000550.t1.1	0.0816125	0.0795089	0.0748278	0	0.0722189	0	0	0.142295
Cre01.g000600.t1.1	0.447819	0.109069	0.513238	1.10214	2.27858	1.74306	0.973699	0.878391
Cre01.g000650.t1.2	0.150158	0.219432	0.550701	0.201578	0.79725	0.584465	1.30596	1.24358
Cre01.g000700.t1.2	0.753046	0.978182	0.690443	0.524179	1.03658	1.37509	0.873258	1.0212
Cre01.g000750.t1.2	1.78334	2.1383	1.76086	1.71878	2.67059	2.72907	2.98272	3.58768
Cre01.g000800.t1.1	5.11089	4.97916	2.556	2.70284	4.11148	2.21036	1.81844	2.43029
Cre01.g000850.t1.1	117.026	130.444	103.818	100.016	73.7024	74.2304	69.5043	70.5869
Cre01.g000900.t1.1	14.7384	15.8055	9.1135	7.97548	28.5104	26.2868	18.681	19.1233
Cre01.g000950.t1.2	0.0937225	0.273921	0.429656	0.419389	0.663481	0.567465	0.326052	0.245114
Cre01.g001000.t1.2	0.117927	0.114887	0.108123	0.316619	0.626122	0.918021	0	0.102805
Cre01.g001100.t1.1	56.7368	59.4478	59.09	57.0816	42.8776	45.1228	48.9315	51.8682
Cre01.g001150.t1.2	1.89936	1.87844	2.11086	2.08617	2.03726	1.64287	1.77706	1.80633
Cre01.g001200.t1.2	0.0790867	0.192621	0.072512	0.141559	0.384911	0.410442	0.412702	0.379201
Cre01.g001237.t1.1	7.86846	6.96877	5.24679	4.99338	7.46919	10.7657	5.97242	5.61232
Cre01.g001250.t1.1	0.168253	0.245875	0.102844	0.0752899	0.297775	0.412343	0.341447	0.586714
Cre01.g001300.t1.2	0.177994	0.0867033	0.0815986	0.0159298	0.173258	0.338709	0.0928838	0.0931023
Cre01.g001350.t1.1	1.66129	1.70839	2.20016	1.89978	1.14339	1.43696	1.60541	1.12643
Cre01.g001400.t1.1	0.396785	0.22089	4.57348	4.00763	1.3543	1.81408	13.6066	13.8857
Cre01.g001450.t1.1	0.239814	0.350448	0.329816	0.107312	0.212211	0.103715	0	0.313594
Cre01.g001500.t1.1	0.761642	1.27202	0.199521	0.681638	0.962825	1.22347	0.378526	0.189708
Cre01.g001550.t1.2	19.9252	23.6662	17.6431	18.3208	15.2165	16.8804	12.7004	12.0164
Cre01.g001600.t1.1	9.89277	10.8425	5.10208	4.79571	5.74489	7.309	2.68875	3.14425
Cre01.g001650.t1.1	0.804651	1.82913	0.983678	1.08019	2.37345	1.39199	1.8662	1.63677
Cre01.g001700.t1.2	0.612333	0.19885	0.0623809	0.182671	0.240824	0.176548	0.355041	0.474502
Cre01.g001750.t1.1	3.59742	4.38087	2.82717	3.21955	7.50364	7.55683	5.47535	2.91212
Cre01.g001800.t1.2	8.54111	5.88206	5.33323	5.79885	7.7535	6.11399	6.2117	5.96956
Cre01.g001950.t1.1	6.59473	6.09807	7.99367	10.3035	4.54985	4.93074	13.3183	10.9135
Cre01.g002000.t1.2	84.2151	77.5066	165.703	166.912	55.232	53.0206	128.339	144.071
Cre01.g002050.t1.2	9.63488	10.4859	30.2422	32.5492	13.5186	12.0878	75.1153	72.3409
Cre01.g002100.t1.1	4.57078	5.16544	5.95094	4.49972	3.39754	3.47913	4.05483	4.30345
Cre01.g002150.t1.1	0.12137	0	0	0.325862	0.4296	0.314941	0.211117	0.105807
Cre01.g002200.t1.2	13.8785	11.1487	11.6085	11.9848	20.253	22.7451	16.0939	16.7686
Cre01.g002201.t1.1	0.991899	0.702788	0.0826764	0.645606	1.43629	1.16994	0.313702	0.15722
Cre01.g002227.t1.1	3.69576	4.169	2.14012	1.9149	2.23763	3.53319	0.845867	2.20443
Cre01.g002236.t1.1	5.68105	3.35431	3.47251	2.61918	3.35144	2.82921	3.14424	3.15164
Cre01.g002250.t1.1	4.877	4.96727	2.33741	2.38075	5.78691	6.23176	2.02443	3.0921
Cre01.g002300.t1.1	672.041	679.025	819.151	805.794	847.88	861.828	830.044	819.883
Cre01.g002350.t1.2	20.6004	20.3897	23.2079	21.0843	13.2841	12.2266	15.7247	15.0931
Cre01.g002400.t1.2	28.2896	32.6485	27.534	28.0445	20.6045	20.7049	32.1747	32.8195
Cre01.g002450.t1.2	0.807372	0	0.493502	0.48171	0.714444	1.62948	0.936256	1.17307
Cre01.g002500.t1.1	429.495	422.045	370.912	375.669	256.975	248.43	236.869	229.867
Cre01.g002550.t1.2	4.84695	4.41737	4.65905	5.59719	6.15689	5.34197	6.1193	7.42859
Cre01.g002600.t1.1	0.380697	0.494513	1.04715	0.454277	0.336879	0.76834	0.882939	1.10627
Cre01.g002650.t1.1	0.231156	0	0	0	0	0	0	0.100758
Cre01.g002700.t1.1	4.22335	3.40732	4.71931	4.01596	3.50367	3.25349	5.10799	5.17753
Cre01.g002750.t1.1	1.68265	1.00879	2.61084	1.73758	1.60352	1.56739	1.80116	2.14391
Cre01.g002800.t1.2	0.062668	0.0763159	0.0143646	0.0140213	0.124774	0.189719	0	0.0546321
Cre01.g002850.t1.2	1.3247	0.843824	0.607287	0.501579	1.12714	1.41023	0.974875	0.621834
Cre01.g002900.t1.1	4.43011	6.47389	1.77705	2.23018	13.9657	11.2561	7.22434	9.17236
Cre01.g002950.t1.2	10.9187	10.7505	5.96401	6.86105	7.40066	7.23391	6.66761	6.3795
Cre01.g003000.t1.2	1.274	1.46683	0.637141	1.34749	1.12737	0.70125	0.705112	0.504836
Cre01.g003050.t1.1	3.68779	2.69455	23.5628	24.8047	1.78463	1.99362	21.5495	21.349
Cre01.g003100.t1.2	0	0	0.257447	0.376943	0.124235	0	0.48842	0.244784
Cre01.g003150.t1.1	4.52708	5.32576	4.62062	5.04532	3.25016	3.17693	3.04585	3.42533
Cre01.g003200.t1.1	4.11698	3.66708	2.48054	2.00017	7.18215	6.20638	1.43226	0.820359
Cre01.g003300.t1.1	0	0	0	0.117643	0	0	0	0
Cre01.g003350.t1.2	4.67969	4.75729	2.42515	3.27767	6.66171	7.21557	1.41567	2.30587
Cre01.g003400.t1.1	0.33948	0	0.155629	0	0.300406	0.293637	0.147627	0
Cre01.g003450.t1.2	3.78476	4.89263	1.93526	1.88901	3.0271	4.02913	1.89906	1.14211
Cre01.g003500.t1.1	2.65034	3.03326	2.35924	3.27006	2.23144	2.09214	2.84218	2.87129
Cre01.g003519.t1.1	0	0	0.803948	0	0	0.505623	0.254204	0.764406
Cre01.g003540.t1.1	3.90117	3.04049	1.90766	1.62931	5.98372	4.72411	3.61914	2.72074
Cre01.g003550.t1.2	14.9205	14.8572	6.19762	7.96767	23.7073	21.8897	13.1918	14.2289
Cre01.g003620.t1.1	1.40678	1.37052	1.28984	3.77704	1.24487	1.21682	1.22352	1.22639
Cre01.g003650.t1.2	1.89292	3.41164	1.64878	2.87995	5.02514	4.50259	5.76213	4.62055
Cre01.g003700.t1.1	0.25396	0.197931	0.512265	0.454567	0.584296	1.318	0.530101	0.619907
Cre01.g003750.t1.2	0.829718	0.707291	0.253581	0.185641	0.795403	0.897094	0.210475	0.331524
Cre01.g003800.t1.2	0.0312654	0.0913786	0.143331	0.0839437	0.359668	0.324521	0.3535	0.354332
Cre01.g003850.t1.2	28.0547	30.4102	13.0732	13.3127	32.3961	34.7995	12.2	10.8177
Cre01.g003900.t1.1	11.3691	0	0	0	0	0	0	4.95564
Cre01.g003950.t1.2	15.8021	15.5433	5.35745	3.95618	14.5678	15.8217	2.20956	2.83489
Cre01.g004000.t1.1	11.1037	12.3628	6.83554	8.23378	14.8788	7.95781	7.86367	9.12673
Cre01.g004050.t1.1	1.36096	0.441961	0	0.406001	0	0	0.789109	0.395483
Cre01.g004100.t1.2	0.213607	1.04051	0.979246	0.955846	0.567063	0	0.371559	0.372433
Cre01.g004124.t1.2	7.35571	8.06188	3.76882	4.59846	3.92459	3.64903	1.36416	1.08447
Cre01.g004150.t1.2	0.16943	0.165063	0.155345	0	0.599716	0.293102	0.147358	0.295409
Cre01.g004157.t1.1	0.809943	0.939366	0.601161	0.655831	5.76788	4.60375	2.78417	3.86666
Cre01.g004200.t1.1	0.907535	0.952154	0.512055	0.624774	1.11195	1.4492	1.09289	0.48687
Cre01.g004250.t1.1	25.5779	26.9121	14.0709	17.3973	34.4035	42.9204	38.7076	38.3527
Cre01.g004300.t1.1	101.743	102.154	100.218	101.207	76.7493	74.4429	99.5137	91.0235
Cre01.g004350.t1.1	19.6252	20.6402	55.2078	51.8262	15.1297	16.7178	51.7874	51.2612
Cre01.g004400.t1.1	1.73547	1.05671	0.994499	1.74732	3.07144	3.00224	1.50938	1.89117
Cre01.g004450.t1.1	227.542	208.874	219.238	224.356	130.532	113.508	154.908	158.863
Cre01.g004500.t1.1	350.525	352.46	272.839	274.597	280.289	287.771	299.265	321.704
Cre01.g004550.t1.1	2.3051	1.57805	0.514088	0.780583	2.64621	3.39489	2.87175	2.60695
Cre01.g004600.t1.2	0.742321	0.361594	1.52003	1.37298	1.53272	1.79782	3.42176	4.12009
Cre01.g004650.t1.1	9.22589	7.84068	5.57929	8.25679	12.8539	12.3945	12.975	14.0322
Cre01.g004700.t1.1	12.1921	13.7052	8.81387	8.39343	10.7888	12.7766	5.09799	4.49678
Cre01.g004750.t1.2	0.174471	0	0.239951	0.234217	0.694754	0.452733	0.834582	0.532347
Cre01.g004800.t1.1	49.5842	46.9231	18.5009	17.8773	25.752	27.0136	8.378	9.10488
Cre01.g004850.t1.2	1.37849	1.21299	1.34543	0.875521	0.826333	0.846177	1.27625	1.47308
Cre01.g004900.t1.1	20.1426	21.1185	58.5703	64.038	79.6148	86.4492	219.566	220.918
Cre01.g004950.t1.2	13.1138	11.8055	11.7192	13.0733	25.1184	23.4038	20.5008	21.7068
Cre01.g005000.t1.2	10.9687	10.2345	11.0484	8.29566	15.7213	15.5007	11.8239	12.3905
Cre01.g005050.t1.1	152.973	155.052	186.444	184.879	84.5832	89.3809	85.7005	80.5935
Cre01.g005100.t1.2	3.53123	2.88978	1.9426	2.40183	2.49983	2.93221	0.859936	1.10823
Cre01.g005150.t1.1	303.833	294.711	391.749	401.033	187.766	198.119	268.44	274.531
Cre01.g005200.t1.2	0.52955	0.773852	0.364146	0.414685	1.4058	1.43138	0.287852	0.577059
Cre01.g005300.t1.1	0	0	0.267983	0.261579	0	0	0	0
Cre01.g005400.t1.2	0.630189	1.22789	0	0	0.557654	0.181697	0.730788	0.366254
Cre01.g005450.t1.1	9.07307	13.0378	4.78331	7.71402	11.6417	13.3414	8.87747	15.2261
Cre01.g005500.t1.1	11.7373	13.5836	9.75037	8.81239	8.57394	7.76753	8.63244	6.79859
Cre01.g005534.t1.1	5.85527	8.4207	1.53386	3.74301	3.20749	2.89405	3.15248	1.45842
Cre01.g005550.t1.1	9.72228	9.70848	8.46834	10.0062	10.9692	8.40941	5.28482	7.20427
Cre01.g005650.t1.1	10.1059	7.79428	7.33539	6.40641	6.70703	5.64536	3.29601	4.95564
Cre01.g005700.t1.2	0	0	0	0	0	0.205396	0	0
Cre01.g005701.t1.1	0	0	0	0	0.185048	0.180878	0.0909371	0
Cre01.g005750.t1.2	0	0	0	0	0.175059	0	0.172057	0
Cre01.g005800.t1.2	3.52587	3.95024	1.13146	1.57775	3.43205	4.26964	1.6866	2.61269
Cre01.g005804.t1.1	0	0	0.210023	0.205004	0	0.594399	0	0.199693
Cre01.g005813.t1.1	0	0	0	0.144095	0.284952	0.417797	0.280065	0
Cre01.g005850.t1.1	7.14214	7.66805	7.08296	7.1746	11.2214	11.3468	4.94401	4.7015
Cre01.g005900.t1.2	0.191307	0.186376	1.22782	0.342424	2.53932	2.81305	1.33108	2.16809
Cre01.g005950.t1.1	13.0046	15.918	10.2929	10.2459	24.491	25.189	8.02365	8.33322
Cre01.g006000.t1.2	0.554867	1.28384	1.14467	0.993166	1.22751	1.07986	2.1113	2.35812
Cre01.g006050.t1.2	6.27115	7.41061	6.12248	5.40455	5.13828	4.72115	2.92909	3.64467
Cre01.g006100.t1.1	2.62777	2.27559	3.21242	2.87435	3.61715	4.54584	5.33269	2.54535
Cre01.g006150.t1.2	4.7452	5.91731	6.004	7.38936	4.61894	4.2686	3.79686	4.79861
Cre01.g006200.t1.1	4.88673	0	4.48048	0	0	0	0	4.26011
Cre01.g006250.t1.1	3.90481	1.26806	2.7846	2.32976	0.38393	1.50112	0.377346	1.1347
Cre01.g006300.t1.2	5.74316	5.59513	0	2.56995	2.54106	2.48381	7.49246	5.00673
Cre01.g006350.t1.1	2.54765	3.86087	1.81678	2.02671	0.250491	0.734541	0.738586	0.246775
Cre01.g006394.t1.1	0	0	0	0	5.86865	5.73642	0	11.5632
Cre01.g006400.t1.1	0	0	0	10.3869	0	0	0	0
Cre01.g006500.t1.2	0	0	0	0.130039	0	0	0.252745	0.38001
Cre01.g006550.t1.2	6.42175	8.60232	23.1836	19.0376	0.355163	1.04148	0	0.349894
Cre01.g006600.t1.1	15.1933	19.7356	9.28681	13.5974	0	0	0	0
Cre01.g006650.t1.1	0	0	1.56679	0	0	0	0	0
Cre01.g006700.t1.1	0	0	3.64839	0	0	3.44185	0	0
Cre01.g006750.t1.1	3.37628	3.28926	1.5478	3.02163	0	0	0	0
Cre01.g006800.t1.2	1.31949	0.771285	0.967835	1.0628	3.15256	1.59783	0.344277	1.03526
Cre01.g006850.t1.1	2.45877	0.855498	2.09334	2.98639	3.41906	2.88629	1.37472	1.99038
Cre01.g006900.t1.2	0	0	0.0407967	0	0.118123	0.192436	0.116097	0.0387901
Cre01.g006950.t1.2	58.3615	61.2184	60.6545	63.9534	110.918	116.449	112.476	110.139
Cre01.g007000.t1.1	1.04946	1.53361	4.08941	4.93091	1.85733	1.66419	1.36911	2.36346
Cre01.g007050.t1.1	57.3686	54.0458	39.1158	42.4813	33.1135	33.375	24.8208	25.5139
Cre01.g007051.t1.1	5117.81	5048.57	5626.22	5800.12	3590.84	3512.83	3852.26	3887.17
Cre01.g007100.t1.2	0.467983	0.911841	0.729433	0.460708	0.786825	0.850054	0.48842	0.979138
Cre01.g007150.t1.2	2.78957	2.21439	2.55766	2.31162	4.6627	3.12779	4.40303	3.7829
Cre01.g007200.t1.1	14.8821	15.7873	11.7498	11.765	8.92578	8.65315	9.20416	10.7394
Cre01.g007250.t1.2	0.125273	0.122044	0.0574291	0.0560568	0.443415	0.379246	0.217905	0.327627
Cre01.g007300.t1.1	1.27879	1.13257	16.9477	15.1901	1.44022	1.70943	0.303326	0.202693
Cre01.g007350.t1.1	0.130894	0.510083	0.120013	0.117145	3.01154	2.26437	0.455369	0.34233
Cre01.g007400.t1.2	0.390253	0.570292	0.268358	0.17463	0.431669	0.337554	0	0.170106
Cre01.g007450.t1.2	0.124461	0	0	0	0	0	0.108247	0
Cre01.g007500.t1.2	1.78342	1.287	2.24077	2.60103	2.338	2.05679	1.66598	2.07298
Cre01.g007550.t1.2	4.49062	4.86097	4.46042	4.24219	6.1814	7.01318	3.25468	3.15359
Cre01.g007600.t1.2	53.0559	55.9957	28.1833	34.1047	40.8011	39.1533	20.8747	30.6515
Cre01.g007650.t1.1	2.12006	1.74766	1.04667	0.145951	3.46346	3.66755	0.992854	0.56868
Cre01.g007700.t1.2	7.04465	8.71502	5.22873	5.404	23.55	20.5046	14.8796	11.8927
Cre01.g007750.t1.1	0.887081	1.08027	1.42334	1.78628	1.17747	1.72641	3.08607	3.47999
Cre01.g007800.t1.2	0.31157	0	0.285668	0	0	0	0	0.950662
Cre01.g007850.t1.1	199.062	196.271	208.053	211.032	195.487	201.052	182.737	187.562
Cre01.g007901.t1.2	1.65448	1.15131	1.30023	0.528818	6.6928	6.95087	4.83074	3.91489
Cre01.g007902.t1.1	63.0227	66.98	45.2656	42.7657	36.8916	34.3733	38.1673	37.7257
Cre01.g007950.t1.2	9.94365	8.6241	6.11507	5.86042	12.9841	11.328	6.64438	9.09145
Cre01.g008000.t1.1	4.06903	2.88302	4.91782	3.97267	4.41902	3.51955	3.05635	2.74107
Cre01.g008050.t1.2	18.8843	20.5877	24.3226	24.9486	14.3235	11.8618	13.8823	14.111
Cre01.g008081.t1.1	16.1814	18.4413	4.0123	4.55398	7.65476	9.1548	3.09791	2.6616
Cre01.g008100.t1.1	0.218237	0.141741	0	0.0651044	0.257491	0.440456	0.0632688	0.380506
Cre01.g008150.t1.2	1.78997	1.5853	4.96079	4.66021	3.56387	2.63907	19.849	19.009
Cre01.g008200.t1.2	2.17964	2.26991	1.37824	1.27804	2.06179	2.08034	0.915162	1.11388
Cre01.g008250.t1.1	0.108658	0.0529284	0.0498123	0	0.192302	0.187969	0.0945022	0.0947245
Cre01.g008300.t1.2	0.0998721	0	0.366278	0.357526	0.707015	0.604699	0.60803	0.261197
Cre01.g008350.t1.2	0.158398	0.308631	0.508306	0.637919	0.4205	0	0.137763	0
Cre01.g008400.t1.2	0	0	0.301401	0.196133	0	0.0947795	0	0
Cre01.g008406.t1.1	0	0.0843531	0.0793868	0.232469	0.459714	0.374463	0.225915	0.0754822
Cre01.g008450.t1.1	0.186691	0.363759	2.48198	3.00746	1.89984	1.21111	0.974221	0.488256
Cre01.g008500.t1.1	3.96679	4.22685	1.47754	1.10941	7.02044	6.1117	4.20472	4.53881
Cre01.g008550.t1.2	13.7925	14.5501	14.5914	13.1472	14.7327	14.6831	7.94981	7.75507
Cre01.g008600.t1.2	1.13045	1.15638	0.984651	0.910537	0.900304	0.928909	0.934024	1.23187
Cre01.g008650.t1.2	5.08398	5.11169	19.8406	19.1331	2.59547	2.05778	8.98505	7.6993
Cre01.g008700.t1.1	7.09334	7.75326	3.80702	4.79989	7.04238	6.8837	5.71785	2.26236
Cre01.g008750.t1.1	0	0.0854421	0	0	0.0776081	0.151719	0	0
Cre01.g008800.t1.2	0.38061	0.7416	0.174485	0.113544	1.17881	1.20712	0.275855	0.331805
Cre01.g008850.t1.2	8.64939	8.50728	8.06346	7.07257	8.77347	7.67874	9.16421	9.45701
Cre01.g008891.t1.1	6.88612	4.86375	5.99797	6.31686	4.72248	3.87155	5.39013	7.80406
Cre01.g008900.t1.1	0	0	0	0.391957	0.775104	0.37882	0	0
Cre01.g008950.t1.1	21.6111	23.6859	19.5393	21.4901	22.5766	27.7796	35.242	35.0633
Cre01.g009000.t1.2	6.03071	8.8129	7.60287	6.40921	5.67012	6.84644	2.29472	5.91458
Cre01.g009050.t1.1	0	1.48286	1.39556	0.681106	0	0	1.3238	1.32692
Cre01.g009100.t1.2	0.177134	0.172569	0.243613	0.475583	0.235119	0.153214	0	0.0772102
Cre01.g009150.t1.2	9.01092	6.7131	20.4115	21.8213	5.1595	5.04324	21.2061	18.2524
Cre01.g009200.t1.1	0.757323	0.295121	0.277746	0.135554	0.536125	0.524045	0.526931	0.52817
Cre01.g009250.t1.2	0	0.0991827	0.0933434	0.0911128	0.540533	0.748502	0.177088	0.221881
Cre01.g009300.t1.2	15.5998	16.589	9.41776	9.83178	13.9986	13.4932	22.6443	22.6018
Cre01.g009338.t1.1	0.786106	0	0.240252	0	0	0.679952	0.227899	0.228435
Cre01.g009350.t1.1	0.616246	0.360218	1.46904	2.42667	1.96314	1.7057	4.39492	4.29781
Cre01.g009400.t1.1	0.0660838	0	0	0.0591423	0.175433	0.2858	0.0574748	0.05761
Cre01.g009450.t1.2	0.444721	0.577677	0.40775	0.796013	1.31178	2.43622	2.44964	2.4554
Cre01.g009500.t1.1	3.04343	3.36931	1.64889	1.36187	2.69314	2.33331	1.62427	1.20599
Cre01.g009550.t1.2	7.11748	7.12143	9.87686	8.78006	7.74516	5.98996	20.1601	21.9684
Cre01.g009600.t1.2	0.563853	0.219728	0.72377	0.60555	3.09351	3.70661	7.1598	6.39016
Cre01.g009650.t1.1	0.245586	0.143554	1.03578	1.36269	0.738885	1.14708	4.74175	4.41035
Cre01.g009700.t1.2	1.55239	1.33953	0.894669	1.15116	0.902725	1.22767	0.578638	0.347999
Cre01.g009731.t1.1	0.738239	0.940507	0.624801	0.559048	1.45729	0.982383	0.938404	0.544565
Cre01.g009750.t1.2	0	0	0	0	0	0.187737	0	0.126143
Cre01.g009800.t1.1	6.32208	8.0914	6.70577	4.65953	6.14288	6.32614	24.3658	21.6134
Cre01.g009850.t1.1	2.27236	1.9225	1.59	1.01683	3.01622	2.74136	3.06851	3.7013
Cre01.g009900.t1.2	47.1688	45.4898	41.5037	44.6823	38.6261	41.7041	39.9487	39.8769
Cre01.g009950.t1.1	4.93205	4.11851	3.44536	3.78341	10.1835	9.5478	7.35348	6.5518
Cre01.g010000.t1.1	6.49417	4.67632	6.73094	6.44375	14.2418	14.043	13.1381	13.4151
Cre01.g010050.t1.2	0.921515	1.07732	0.535108	0.659774	1.00572	1.43474	0.694604	0.482011
Cre01.g010100.t1.1	20.2554	20.8364	48.5628	48.6409	18.8147	17.8466	25.3855	23.9097
Cre01.g010150.t1.1	1.81053	2.44227	4.0862	3.73927	1.23242	1.62627	2.05918	2.12473
Cre01.g010187.t1.1	0.253567	0.370547	0	0	0.336572	0.328989	0	0.331579
Cre01.g010200.t1.2	3.04975	2.57499	1.39811	1.72862	4.94766	4.48445	1.76829	2.21557
Cre01.g010250.t1.2	2.5522	2.40991	1.36802	1.82729	2.77962	2.47926	1.91237	1.71149
Cre01.g010296.t1.1	0	0	0.165514	0	0	0.624574	0	0
Cre01.g010300.t1.1	0.720122	0.841874	0	0	1.78426	1.74406	0.250524	0.376669
Cre01.g010350.t1.1	17.4171	16.9682	14.1816	13.7264	11.3868	13.6036	11.4176	11.5578
Cre01.g010400.t1.1	103.519	101.225	151.51	140.169	212.895	201.134	149.055	149.239
Cre01.g010450.t1.1	21.2533	18.5132	16.2769	20.5873	21.6834	24.6553	23.7037	26.3752
Cre01.g010500.t1.1	32.1172	29.7723	31.0534	27.6983	41.1667	43.1013	30.1339	24.9444
Cre01.g010550.t1.2	5.63231	5.8862	5.53965	4.76574	4.98404	4.51743	2.76101	3.30315
Cre01.g010600.t1.1	0	0	0	0	0	0.152874	0	0
Cre01.g010650.t1.1	14.7057	15.0009	12.9544	13.9352	5.51143	4.73878	5.71785	5.27883
Cre01.g010700.t1.1	42.4241	37.8612	80.4917	87.4367	38.2261	36.6952	98.303	97.1845
Cre01.g010750.t1.1	19.5518	18.5965	31.4349	31.3057	15.7024	15.9498	46.0174	47.095
Cre01.g010800.t1.2	8.78189	9.76208	11.5616	11.8899	3.68629	3.99277	10.4775	10.1096
Cre01.g010850.t1.2	0.133786	0.130338	0	0.119733	0.118388	0.462881	0	0
Cre01.g010900.t1.1	1889.57	1901.13	1843.54	1837.36	2916.6	2912.56	3085.05	3053.99
Cre01.g010950.t1.2	27.8791	27.8372	19.4668	18.5576	13.9593	13.087	28.6911	29.9262
Cre01.g011000.t1.1	2935.93	2955.13	3024.64	2997.93	2679.7	2731.45	2712.39	2649.04
Cre01.g011050.t1.1	19.1203	18.8575	15.1501	15.4218	22.5595	23.4804	15.1923	17.4917
Cre01.g011100.t1.1	16.4184	19.3188	26.0666	28.2425	23.2709	22.4392	44.1365	41.0803
Cre01.g011150.t1.2	0.0918982	0.0447647	0.168517	0.0822451	0.0813208	0.0794885	0.0399631	0.120171
Cre01.g011200.t1.1	5.38361	4.78878	4.93606	4.81811	8.69941	8.30093	6.92161	5.91761
Cre01.g011250.t1.2	0	0	0	0.193319	0	0.280259	0.0939342	0.376621
Cre01.g011300.t1.1	23.2459	29.5335	32.7803	35.6469	20.0892	18.4607	45.8738	44.2041
Cre01.g011350.t1.1	6.14886	8.98556	10.1478	9.53849	5.6225	4.6094	2.85217	3.75228
Cre01.g011400.t1.2	2.46464	3.27771	1.07607	0.980333	1.48859	2.09798	0.442322	0.818515
Cre01.g011450.t1.2	0.210911	0.0684917	0	0.125838	0.559906	0.36486	0.48916	0.858043
Cre01.g011500.t1.1	71.0973	79.8854	101.691	113.543	72.0016	75.9823	93.7146	102.888
Cre01.g011550.t1.2	0	0	0	0.138299	0.27349	0.133664	0	0.134716
Cre01.g011600.t1.1	6.79062	7.17729	7.22462	7.85465	3.34464	4.21128	4.12304	4.46782
Cre01.g011650.t1.2	0.208803	0	0	0	0.092385	0.451517	0.181601	0
Cre01.g011700.t1.1	0.539029	0.262568	0.247109	0.603011	1.07322	1.7484	0.468808	0.704866
Cre01.g011750.t1.2	1.88303	1.97561	1.32807	1.68523	2.05082	2.25519	2.39359	2.0204
Cre01.g011800.t1.2	0.223251	0.072499	0	0	0.0658518	0	0	0
Cre01.g011850.t1.2	1.18127	1.09328	0.541534	0.634312	1.3589	0.817403	0.719166	0.514899
Cre01.g011900.t1.2	0	0.136056	0.128046	0	0	0.120797	0	0.060874
Cre01.g011950.t1.2	0.204151	0.159111	0.0748717	0.109624	0.469698	0.388482	0.248577	0.284757
Cre01.g012000.t1.2	0.733086	0.914164	0.403286	0.367406	2.25751	1.85155	0.943624	0.818027
Cre01.g012100.t1.2	0.312736	0.304675	0	0.0932952	0.0922467	0.0901682	0.0906648	0
Cre01.g012126.t1.1	0.498066	0.485228	0.342495	0.111437	0.771293	1.07702	0	0
Cre01.g012150.t1.1	78.0544	87.4205	77.455	84.1401	91.6346	97.6514	90.2324	90.6144
Cre01.g012177.t1.1	1.52926	1.27701	1.00152	2.15069	1.35324	1.51171	2.66007	1.33316
Cre01.g012200.t1.2	0.0603692	0.117626	0.276753	0	1.06841	0.678822	0.945083	1.15782
Cre01.g012226.t1.1	16.0403	15.491	13.5559	13.3568	16.9095	17.1317	15.4064	14.9563
Cre01.g012244.t1.1	0	0	0.535403	0	0	1.01019	2.53938	1.52721
Cre01.g012300.t1.2	31.3478	33.8825	24.881	30.1487	20.2873	19.9651	17.9047	16.9951
Cre01.g012350.t1.1	0.578972	1.07169	0.796261	0.569971	2.1518	2.15339	1.05745	0.605678
Cre01.g012400.t1.1	4.12341	3.60156	2.34659	2.92677	3.52299	2.95166	3.83356	2.85095
Cre01.g012450.t1.2	0.855457	0.735359	0.79972	1.276	1.4843	1.84259	2.45086	2.3104
Cre01.g012500.t1.1	98.7382	98.9908	247.185	240.488	92.6511	95.149	216.897	222.318
Cre01.g012550.t1.2	0.361432	0.58686	0.165692	0.323466	0.373136	0.312625	0.104782	0.0525143
Cre01.g012600.t1.2	4.26726	3.66818	2.37819	2.92043	3.85014	3.83577	1.67375	1.5318
Cre01.g012650.t1.2	0	0	0	0.069265	0	0	0	0
Cre01.g012700.t1.1	0.106051	0.0516588	0	0	0.0938448	0.0458651	0.0461177	0.0462262
Cre01.g012750.t1.2	0.31966	0.233565	0.109907	0.107281	0.459659	0.380179	0.17376	0.104501
Cre01.g012800.t1.2	3.85478	4.17269	3.14162	3.19432	3.91644	3.8282	3.22843	3.36049
Cre01.g012850.t1.1	0	0	0	0.0422445	0	0	0	0.04115
Cre01.g012900.t1.2	2.82459	3.56482	2.29549	2.98751	3.80603	3.27606	3.85243	2.91011
Cre01.g012950.t1.2	0.614147	0.598317	0.409521	0.549636	0.345837	0.531214	0.24279	0.146017
Cre01.g013000.t1.2	3.71152	3.96577	4.88491	4.66103	5.66811	5.22972	10.8294	10.0721
Cre01.g013050.t1.2	6.76269	6.27834	4.23093	3.84501	5.42108	5.1613	7.5424	6.24232
Cre01.g013100.t1.2	1.84728	2.6995	1.93567	1.53515	6.88892	8.90218	11.7054	9.54741
Cre01.g013150.t1.1	14.5849	10.0299	7.07953	5.37472	16.7021	14.5943	9.45148	7.72856
Cre01.g013200.t1.1	81.7624	77.328	126.177	127.273	64.2222	52.2862	152.289	151.046
Cre01.g013250.t1.2	7.30085	5.25719	5.38424	5.82375	4.77517	4.25574	5.1074	4.15088
Cre01.g013300.t1.1	9.77345	9.9024	8.33369	8.48443	11.589	11.0743	8.33022	9.28704
Cre01.g013350.t1.1	17.4346	19.9826	20.4987	19.2746	66.9752	68.6596	40.1382	39.1598
Cre01.g013400.t1.2	2.00164	2.15531	1.64205	2.2628	2.05092	2.27808	1.0995	1.10209
Cre01.g013450.t1.1	0.157369	0.613252	0.288573	0.140839	0.139256	0.544474	0.136868	0.13719
Cre01.g013500.t1.1	0.387763	0.125923	0.237018	0.578387	1.25815	1.118	0.899327	0.450722
Cre01.g013550.t1.2	4.21043	3.00807	3.08833	1.84221	4.38818	4.69396	3.41779	4.07837
Cre01.g013600.t1.2	5.54244	4.98424	3.90899	3.85798	8.21611	9.83386	6.26241	7.39216
Cre01.g013650.t1.2	0.896358	0.600363	0.513651	0.45124	0.644465	1.06606	0.292345	0.439549
Cre01.g013700.t1.1	175.819	178.72	168.523	161.956	318.23	327.48	329.129	333.461
Cre01.g013750.t1.2	5.18347	4.25252	7.00377	4.15068	7.00099	6.60727	5.69457	5.70796
Cre01.g013769.t1.1	0.469719	0	0.43067	0.840758	0.415655	0	0.408527	0
Cre01.g013800.t1.2	1.25831	2.22886	1.25858	0.614254	2.22695	1.97889	1.49234	0.89751
Cre01.g013801.t1.1	11.4995	12.1084	14.5905	14.9696	14.493	9.94663	16.568	14.9868
Cre01.g013850.t1.2	1.96711	3.06626	1.26251	2.11258	3.65547	5.10444	4.79038	2.40082
Cre01.g013900.t1.2	4.91444	3.59083	1.77017	1.80641	5.82427	5.16169	2.74771	3.51922
Cre01.g013950.t1.2	1.03882	0.809639	1.07946	0.867724	1.53209	1.49757	1.68652	1.38861
Cre01.g014000.t1.1	49.9502	58.0128	42.5979	39.8231	79.1371	85.0894	56.7225	58.9476
Cre01.g014050.t1.1	35.4018	33.7708	34.8255	31.6831	28.0638	26.5809	36.3491	36.4346
Cre01.g014100.t1.1	0.158895	0	0.291372	0	0.140606	0.274877	0.690976	0.554082
Cre01.g014150.t1.1	2.93461	3.81196	3.02698	4.04896	3.35425	2.96138	4.1475	3.09129
Cre01.g014200.t1.1	0.628766	0.45942	0.576495	0.3517	0.208648	0.203947	0.0683567	0.0685176
Cre01.g014250.t1.2	2.78968	1.6543	1.77932	1.7368	3.75655	3.93419	1.89881	1.74467
Cre01.g014300.t1.2	5.51257	4.38281	3.60191	3.9695	3.02777	3.94607	1.10217	1.49143
Cre01.g014350.t1.1	223.646	226.485	155.158	141.838	184.387	162.271	117.91	126.511
Cre01.g014400.t1.2	8.18443	5.98011	5.00269	6.22602	3.37979	4.01156	2.72865	2.85398
Cre01.g014450.t1.2	0.58579	0.692983	0.959093	0.711493	0.77755	0.796222	0.836998	0.69306
Cre01.g014500.t1.2	2.91025	2.64622	1.4824	1.91001	2.003	2.46132	1.01245	0.789312
Cre01.g014550.t1.2	0	0	0	0.63593	0	0	0	0
Cre01.g014600.t1.1	36.0733	31.5493	40.0276	43.4735	21.039	16.842	29.2348	28.7675
Cre01.g014650.t1.1	11.1494	14.0457	9.69379	12.7309	9.69603	6.31837	8.35943	7.70877
Cre01.g014700.t1.1	12.8206	11.5698	14.3532	14.7348	12.5391	9.45508	13.1457	15.059
Cre01.g014800.t1.2	4.95014	6.12387	5.47516	5.90689	4.6585	4.89335	5.94536	5.47986
Cre01.g014850.t1.1	9.84326	14.0783	14.7856	13.4951	12.6021	16.3035	14.3897	14.2409
Cre01.g014900.t1.2	1.54403	1.2786	2.90213	2.90187	1.43463	2.67106	2.82006	2.35558
Cre01.g014950.t1.2	1.83655	2.78322	2.43226	1.00444	2.70861	2.82408	1.77477	0.978421
Cre01.g015000.t1.1	16.5035	16.0781	14.785	14.2062	18.7287	19.5054	8.54636	12.4104
Cre01.g015050.t1.2	4.31911	5.1641	4.06805	4.21683	3.43979	3.60002	1.91237	1.84841
Cre01.g015100.t1.2	0.426559	2.07782	1.56439	1.90877	1.13239	1.84479	0.74198	1.85931
Cre01.g015103.t1.1	0.28734	0.236867	0.547172	0.316502	0.84104	0.707379	0.84584	0.867099
Cre01.g015150.t1.1	1.31751	0.8557	0.704656	0.687818	1.55449	1.89933	0.954893	0.957139
Cre01.g015200.t1.2	0.452811	0.44114	0.415168	1.04206	0.400693	0.391664	0.506342	0.281963
Cre01.g015250.t1.1	0.470314	0.572739	0.26951	0.315684	2.18495	2.23742	0.306783	0.410006
Cre01.g015300.t1.1	0.0889915	0.173396	0.571154	0.557506	0.236246	0.53882	0	0.387901
Cre01.g015350.t1.1	55.9488	57.5479	50.6372	45.7738	133.76	141.546	46.6761	49.6119
Cre01.g015400.t1.1	22.3239	22.7321	49.8844	49.0939	13.4012	12.1289	13.5617	18.0922
Cre01.g015450.t1.2	0.353931	0.689616	0.216338	0.316753	0.208796	0.612273	0.205215	0.102849
Cre01.g015500.t1.1	39.1702	36.4331	115.131	121.18	56.9137	56.6073	213.797	221.888
Cre01.g015550.t1.2	8.40505	8.35218	7.86045	8.27439	5.80136	5.67064	4.53226	7.18074
Cre01.g015600.t1.2	4.64456	3.51229	5.0327	4.82524	3.93752	3.90499	3.02256	3.2845
Cre01.g015650.t1.1	0.86909	0	0.39842	0.3889	1.92265	4.13452	2.26761	0.378824
Cre01.g015700.t1.1	2.25176	2.4131	2.47749	2.01524	2.19185	1.55815	1.95842	0.196302
Cre01.g015750.t1.1	15.8918	12.5899	17.773	15.1603	16.3807	16.7669	12.7583	11.1137
Cre01.g015800.t1.1	4.85267	5.20035	6.67389	6.08012	2.14707	4.19738	6.75279	5.92259
Cre01.g015850.t1.1	20.5227	17.6756	7.77207	7.98563	16.713	15.0501	20.824	20.484
Cre01.g015950.t1.1	48.4559	45.075	27.9464	27.2786	22.8225	25.4179	13.1868	15.1255
Cre01.g016000.t1.1	0.698322	1.53073	0.560236	0.468727	1.15865	1.43455	0.607349	0.228292
Cre01.g016050.t1.1	22.8617	21.4068	18.2039	17.2796	28.9393	27.4892	23.123	24.4286
Cre01.g016100.t1.2	0	0.428019	0	0	0	0	0	0
Cre01.g016150.t1.1	85.4377	74.8311	456.929	475.408	36.2605	37.8829	36.6487	34.1316
Cre01.g016200.t1.2	5.40605	5.45939	10.6991	11.2694	2.50859	2.45206	7.28202	7.12674
Cre01.g016250.t1.2	0	0	0.241387	0.471238	0	0.455443	0	0
Cre01.g016300.t1.1	46.6423	50.801	79.1629	75.6297	68.2872	62.7822	130.586	137.746
Cre01.g016350.t1.1	0.0904949	0	0.995662	0.566924	1.36134	1.01757	2.43988	3.15564
Cre01.g016400.t1.2	5.03883	5.63086	2.78555	3.44847	8.26201	9.99867	2.96456	2.97154
Cre01.g016450.t1.2	3.55084	4.99679	2.53217	2.04795	3.35161	4.16337	3.63728	2.75157
Cre01.g016500.t1.2	57.7591	58.9432	48.5885	48.5905	74.4944	71.6918	65.5562	62.6892
Cre01.g016504.t1.1	3.08839	2.29241	1.75292	2.8956	18.0893	19.8442	26.6047	23.8467
Cre01.g016550.t1.1	0	0.245024	0.230598	0.56272	0.667675	0.978946	2.29679	3.17922
Cre01.g016600.t1.1	2.09431	0	0	0	1.85326	0.603833	3.64295	4.8687
Cre01.g016650.t1.2	0	1.12833	0	0	0	0.500893	1.51095	0.504836
Cre01.g016700.t1.2	7.97178	3.50245	5.30266	6.99452	12.0337	12.033	7.61299	6.26824
Cre01.g016750.t1.1	0	0	0	0.721519	1.07011	0.348668	2.8047	1.75706
Cre01.g016800.t1.2	0.44354	0.691373	0.813336	0.952681	0.392489	0.690562	0.308607	0.386666
Cre01.g016850.t1.1	134.557	130.592	168.701	180.406	131.924	140.414	199.922	198.615
Cre01.g016900.t1.1	394.314	406.278	293.276	300.666	257.091	246.387	246.372	256.026
Cre01.g016950.t1.1	34.8982	39.0047	27.8747	27.9751	18.5668	19.4447	16.9449	15.305
Cre01.g017000.t1.1	0	0	2.11064	1.0301	2.03705	3.98231	3.00318	1.00341
Cre01.g017050.t1.1	29.8201	30.4845	24.3985	23.6958	17.2763	23.0173	9.76934	9.67575
Cre01.g017100.t1.2	0.475871	1.31355	0.581748	0.496866	1.75458	0.823222	0.758776	0.622277
Cre01.g017150.t1.2	0.0634495	0.278164	0.407224	0.3691	0.308806	0.164644	0.248327	0.138284
Cre01.g017200.t1.1	2.94885	4.30926	7.32253	5.71804	2.60944	3.29458	5.23624	7.06949
Cre01.g017250.t1.1	4.85832	5.32473	2.96962	2.35516	3.22435	3.67698	0.704233	0.70589
Cre01.g017300.t1.1	174.219	169.125	133.459	145.585	299.21	296.213	326.535	314.542
Cre01.g017350.t1.2	4.2953	3.80417	2.74482	3.49465	2.30358	2.92718	1.35845	2.2694
Cre01.g017400.t1.2	4.9275	4.70992	4.85884	5.99082	5.26533	5.6292	6.54965	6.07876
Cre01.g017450.t1.2	0.505157	0.688991	0.277897	0.632932	1.25164	1.66038	0.175739	0.440381
Cre01.g017500.t1.1	22.0713	20.669	20.3933	20.3654	32.4001	32.854	70.2365	67.2694
Cre01.g017550.t1.2	1.14533	0.669483	0.210023	0.205004	1.0135	0.594399	0.199224	0.199693
Cre01.g017600.t1.2	3.75846	5.6958	2.68023	2.61618	9.2385	6.86306	3.99523	1.82029
Cre01.g017650.t1.1	21.1083	18.2021	16.4766	15.317	19.9408	22.2055	37.5851	36.6788
Cre01.g017700.t1.2	9192.94	9110.59	3448.65	3477.1	1055.55	1017.29	680.181	662.519
Cre01.g017750.t1.2	0	0.791149	0.74457	0	2.15583	2.80967	1.41257	2.12385
Cre01.g017850.t1.1	2.11361	0.735404	2.21474	1.89159	6.27898	6.52926	5.90869	5.92259
Cre01.g017900.t1.2	0.486114	0	0	0.435052	0.860325	0	0.845572	0
Cre01.g017950.t1.1	3.09493	1.50758	3.31058	0.923277	0	1.3385	0.448623	1.79871
Cre01.g018000.t1.1	0.378456	0.921752	0	0	1.33958	2.94615	1.64576	0.329927
Cre01.g018050.t1.1	18.6584	17.0561	23.9391	22.4454	10.9358	9.22218	11.117	9.29478
Cre01.g018087.t1.2	0.268088	0	0.491602	0	0.474462	0.927544	0.466326	1.40227
Cre01.g018100.t1.1	2.40989	2.4456	2.57781	2.33648	3.10992	3.03985	2.61993	2.18841
Cre01.g018150.t1.1	4.29102	5.27097	7.61202	7.93103	11.0612	11.2961	7.95081	8.62009
Cre01.g018184.t1.1	0	0	0.649841	0.634312	0	0	0	0
Cre01.g018200.t1.2	2.37792	2.751	1.30814	1.80892	2.28834	2.44246	1.57695	1.2438
Cre01.g018250.t1.1	0	6.7841	0	12.4642	24.6483	0	12.1128	12.1413
Cre01.g018300.t1.2	0	0	0	0	0	0.795147	0	0
Cre01.g018350.t1.1	3.39518	3.78019	7.94115	6.94525	4.53725	4.73468	6.99048	7.73178
Cre01.g018400.t1.2	0	0.601028	0.565642	0.690157	1.91072	1.60086	4.42661	3.36138
Cre01.g018450.t1.2	7.89157	7.11868	5.76163	5.62395	4.39687	4.55061	2.66914	3.18502
Cre01.g018500.t1.2	4.6179	3.88539	2.79059	2.25427	2.04319	2.54183	0.638958	1.18943
Cre01.g018550.t1.2	1.02379	0.890535	0.670484	0.589016	1.5207	1.61294	1.30382	1.24314
Cre01.g018600.t1.1	76.4519	80.5055	162.355	151.181	50.988	48.1373	117.339	117.37
Cre01.g018650.t1.2	0.193467	0.09424	0.0886916	0.173145	1.15559	1.04588	0.799248	0.463811
Cre01.g018680.t1.1	26.0868	28.2152	16.0105	15.7232	27.7953	31.4056	15.4651	14.9446
Cre01.g018700.t1.2	3.28213	4.58313	1.50464	1.46869	3.58204	2.74429	3.04486	2.19364
Cre01.g018750.t1.1	1.43003	1.52378	0.573628	0.759892	1.85861	1.54615	1.6324	1.86999
Cre01.g018800.t1.1	987.814	1010.2	984.658	964.947	484.193	482.557	473.382	486.457
Cre01.g018850.t1.1	14.7101	15.7178	19.7233	18.9689	6.01861	10.1242	15.5451	12.8239
Cre01.g018900.t1.1	12.2175	12.8009	13.0336	12.5158	9.92732	9.57072	14.2347	14.938
Cre01.g018950.t1.1	4.46435	6.83458	2.33898	2.28309	4.51486	5.37851	0.41601	1.38996
Cre01.g019000.t1.1	12.9723	7.02106	7.59885	6.4498	9.88484	6.5453	5.64116	7.85337
Cre01.g019050.t1.2	0.294651	0.0956855	0.810468	0.439501	0.347649	0.594678	0.683375	0.513737
Cre01.g019100.t1.1	8.45707	7.01199	4.28945	1.28829	4.61758	3.11279	1.09547	1.56865
Cre01.g019150.t1.1	0.519283	1.21416	1.14267	1.11537	1.65425	1.52714	0.812941	0.452696
Cre01.g019200.t1.2	0.173062	0.0843007	0.476025	0	0.382857	1.12269	0.0752583	0
Cre01.g019250.t1.1	54.1858	53.3067	40.1022	43.8982	111.411	103.081	98.2578	98.1802
Cre01.g019300.t1.2	0.296176	0.307778	0.235347	0.247394	0.36692	0.375732	0.171728	0.223771
Cre01.g019350.t1.2	3.00047	1.46157	4.12655	3.13284	1.77008	0	1.30479	2.17977
Cre01.g019400.t1.1	2.14815	0.697594	3.28261	4.48584	3.8018	0.619356	2.49107	1.8727
Cre01.g019450.t1.2	2.0582	1.11397	1.8871	1.02334	3.03551	3.56053	2.38676	2.19301
Cre01.g019500.t1.1	1.95317	1.79711	9.15296	10.2938	4.70498	4.12968	13.6841	14.4731
Cre01.g019550.t1.1	0	0	0.0979998	0	0.0472915	0	0	0.0465898
Cre01.g019600.t1.1	85.5143	80.701	52.9718	55.8151	49.2628	51.1313	36.7711	35.6901
Cre01.g019650.t1.2	6.22675	5.45963	3.90122	6.03707	6.4284	5.56544	4.15193	3.70934
Cre01.g019700.t1.1	0.460541	0.652611	0.575802	0.711921	1.25965	1.0502	1.12881	0.839472
Cre01.g019750.t1.2	11.2455	7.77198	10.3988	11.5266	9.35582	9.5607	10.0313	9.80354
Cre01.g019800.t1.1	0.187319	0.547473	0	0	0	0	0.488748	0.326599
Cre01.g019850.t1.2	17.194	16.9272	20.3281	22.596	19.219	18.6294	23.2969	22.0106
Cre01.g019900.t1.1	3.55172	3.63318	1.30258	1.03306	2.75005	2.84169	1.69896	2.08999
Cre01.g019950.t1.1	0	0	0.21194	0.206875	0.102275	0	0.100521	0.201516
Cre01.g020000.t1.2	0.0471788	0	0	0	0	0	0	0.0411291
Cre01.g020050.t1.2	0.0774592	0.0754627	0.14204	0	0	0	0	0
Cre01.g020100.t1.2	0.0840252	0	0	0	0	0.0242262	0	0
Cre01.g020150.t1.2	0.224753	0.145973	0.137379	0.201144	0.464062	0.648008	0.781892	0.522488
Cre01.g020200.t1.2	0	0.175413	0	0.161141	1.11531	0.934439	1.09618	0.470898
Cre01.g020250.t1.1	1.82238	2.45825	1.92794	2.50916	3.96953	3.39508	3.77954	4.03285
Cre01.g020300.t1.1	130.508	124.78	131.279	128.865	207.59	198.015	193.711	191.111
Cre01.g020350.t1.1	293.302	299.513	316.185	317.745	205.096	192.384	180.607	175.958
Cre01.g020400.t1.1	11.0627	12.0606	10.1431	9.66494	12.0037	12.7584	13.6305	14.1218
Cre01.g020500.t1.1	0.33722	0	0	0	0	0	0	0
Cre01.g020550.t1.1	0	0	0	0	0	0	0	0.185505
Cre01.g020600.t1.1	2.69682	1.87665	5.65173	4.82709	6.47743	8.66413	8.20924	8.39648
Cre01.g020650.t1.2	4.72794	5.00089	1.73396	2.23655	4.12399	3.5637	1.76229	1.64867
Cre01.g020700.t1.2	0.937856	2.74105	0.85989	1.67868	0.82991	1.62242	3.26271	4.08798
Cre01.g020750.t1.1	17.8255	22.8024	31.2661	30.3803	19.6144	17.1614	16.447	14.3236
Cre01.g020751.t1.1	0	0	4.3286	4.22516	0	0	0	0
Cre01.g020800.t1.1	6.08173	3.79198	4.46091	6.74919	1.72215	3.3667	5.92417	4.45358
Cre01.g020850.t1.2	0.221638	0.350878	0.152409	0.148767	0.465803	0.479271	0.144573	0.21737
Cre01.g020887.t1.1	3.82838	5.53804	4.57378	5.81422	3.38773	1.90656	2.72425	2.42725
Cre01.g020900.t1.2	86.5326	87.0494	86.5296	84.5407	75.4031	81.5548	99.5542	95.717
Cre01.g020950.t1.1	1.47378	0.522105	0.85989	1.43887	2.8454	2.66541	1.3983	1.51839
Cre01.g021000.t1.2	2.7976	3.55499	0.892183	1.3063	1.29161	1.1573	0.952099	0.636226
Cre01.g021050.t1.1	7.09163	7.67649	3.9735	3.70225	9.93603	14.3126	4.4545	3.60633
Cre01.g021100.t1.1	1.13057	0.82607	0.475099	0.632381	1.3756	1.10014	0.450671	0.410665
Cre01.g021150.t1.2	0	0	0.167797	0	0	0	0.15917	0
Cre01.g021173.t1.1	16.5085	23.9783	14.5857	17.4607	25.2327	22.0679	14.3579	17.27
Cre01.g021200.t1.1	3.37726	1.88012	2.35924	2.59072	1.70774	2.64299	1.25884	1.2618
Cre01.g021250.t1.2	19.1216	17.0153	12.0101	11.4536	24.5151	24.3534	16.7615	17.851
Cre01.g021350.t1.1	24.2519	24.0856	19.4293	19.3865	22.919	22.8099	15.973	12.9316
Cre01.g021400.t1.1	22.4367	16.5271	16.3067	17.876	11.1378	10.5318	7.97209	10.4954
Cre01.g021450.t1.2	20.1885	18.3142	19.9857	19.7045	13.9812	13.0968	14.5685	13.2636
Cre01.g021500.t1.2	9.04737	8.4391	11.0309	9.81979	5.79159	7.65913	7.11534	6.2091
Cre01.g021550.t1.2	1.33712	1.02841	0.387146	0.50386	1.99279	2.37399	0.734481	0.736209
Cre01.g021600.t1.1	40.6088	42.5179	27.1757	29.4505	29.2228	25.4354	15.9339	18.6163
Cre01.g021650.t1.1	5.36189	5.62551	4.53798	4.18346	6.6913	9.75134	5.14167	4.07507
Cre01.g021700.t1.2	0.0934082	0.0910007	0	0.0417983	0.82657	0.969535	0.324958	0.407153
Cre01.g021750.t1.1	13.5922	17.1584	11.5846	14.3917	10.5031	8.94172	10.656	13.3513
Cre01.g021800.t1.1	0.152459	0.29706	0.139785	0	0.269823	0.395615	0.132598	0
Cre01.g021850.t1.2	0.842127	0.898556	1.02949	0.717779	1.06457	1.07527	1.04631	0.80406
Cre01.g021900.t1.2	1.11585	0.543543	0.511542	0.12483	1.23427	1.20646	0.485241	0.486382
Cre01.g021950.t1.2	0.770246	1.02876	0.41006	0.500326	0.351789	0.365354	0.345756	0.303248
Cre01.g022000.t1.2	0.504791	0.196712	0.18513	0.361413	0.268014	0.17465	0.351223	0.176025
Cre01.g022050.t1.1	0	0	0.469462	0	0	0	0	0
Cre01.g022100.t1.1	5.4987	5.56623	5.67177	4.61354	6.12026	6.31678	8.81747	8.08921
Cre01.g022150.t1.1	0.0834212	0	0.0764862	0	0.295278	0.57725	0.652982	0.436345
Cre01.g022200.t1.1	0.71458	0.696162	4.32416	3.83712	2.02346	1.60702	9.57093	9.96721
Cre01.g022250.t1.2	18.5389	18.0611	12.5025	12.0666	10.4396	10.9995	10.2606	9.88402
Cre01.g022300.t1.2	1.27538	1.49101	1.87097	0.913131	0.902869	0.882526	0.221847	0.222368
Cre01.g022350.t1.1	0.522704	0.45265	0.639001	0.623732	0.411148	0.401884	0.303073	0.354417
Cre01.g022400.t1.2	0.823049	1.94731	0.862431	1.78887	1.97686	1.83062	2.04522	2.76754
Cre01.g022462.t1.1	0.526547	0.512975	0.965548	0.785396	0.931884	0.910887	0.763253	1.07107
Cre01.g022500.t1.1	7.07597	7.8668	11.9069	13.0379	6.70352	5.4724	11.6567	11.7567
Cre01.g022550.t1.2	0.254494	0.86777	2.2167	2.73314	1.12601	2.09121	2.32407	1.77488
Cre01.g022600.t1.2	14.9307	17.4074	26.5935	25.4104	16.6777	17.2546	29.6966	30.62
Cre01.g022650.t1.1	28.2347	26.5093	20.2539	17.4133	17.6059	22.7769	15.0138	12.4984
Cre01.g022681.t1.2	2.28314	1.97715	2.32593	2.95146	0.673451	0.438852	0.441268	0.442306
Cre01.g022700.t1.2	1.12457	0.982244	0.817752	0.728801	0.995129	1.00625	0.269811	0.270446
Cre01.g022750.t1.2	4.11222	4.37043	2.83556	3.10237	3.54868	3.88027	6.73919	7.28834
Cre01.g022800.t1.2	1.8941	1.51964	2.24741	2.49285	1.38031	1.73469	2.03495	2.234
Cre01.g022850.t1.1	0	0.0778551	0.109907	0	0.495017	0.794919	0.243264	0.209003
Cre01.g022900.t1.2	0.0871401	0.127341	0.0798959	0	0.0771103	0.113059	0.075788	0.113949
Cre01.g022950.t1.1	3.49819	3.72753	2.00461	3.13074	1.83798	1.32379	1.236	1.62011
Cre01.g023000.t1.2	3.41828	3.8702	2.79528	3.80335	4.57813	5.11426	5.78523	7.49016
Cre01.g023050.t1.1	11.4374	11.4854	10.3252	17.1649	13.3908	11.7193	16.6809	17.1804
Cre01.g023100.t1.2	0.261053	0.254324	0.957404	1.16816	0.924023	1.35481	1.13522	0.910314
Cre01.g023150.t1.1	5.74645	4.58753	3.36614	3.2857	8.68694	9.18156	6.59437	5.84453
Cre01.g023200.t1.1	59.4272	60.6041	77.7474	71.3797	15.8377	24.1982	24.3314	26.055
Cre01.g023250.t1.2	2.5803	3.14224	0.709738	1.27009	2.9683	3.12461	1.23428	0.67483
Cre01.g023300.t1.1	6.16646	6.59362	6.34331	3.90349	7.18688	7.93558	4.57828	6.94913
Cre01.g023350.t1.2	28.117	26.9184	22.9251	23.8575	44.3377	47.9671	57.6237	56.9959
Cre01.g023400.t1.1	22.8811	23.5128	38.7967	35.3449	21.4494	22.7735	52.5222	48.8203
Cre01.g023450.t1.1	0.346017	0.505647	0.55519	0.696759	0.612381	0.897874	0.15047	0.150824
Cre01.g023500.t1.1	1.50768	1.39538	1.31322	1.34931	1.60097	2.02133	1.50796	2.2344
Cre01.g023550.t1.2	0.499629	0.535427	0.229047	0.268288	0.751608	0.734673	0.564903	0.435563
Cre01.g023650.t1.2	0.0805388	0.117694	0.0369217	0	0.0712688	0.139326	0	0
Cre01.g023700.t1.1	0	0.229775	0	0	0	0.204005	0	0
Cre01.g023750.t1.2	3.53051	3.52885	4.4141	5.04725	3.6516	3.13308	6.02152	5.8758
Cre01.g023773.t1.1	0	0	0	0	1.03131	2.01615	1.01362	0
Cre01.g023800.t1.2	0.792982	0.940487	0.75867	0.67883	1.80004	1.69984	0.80962	0.721355
Cre01.g023850.t1.2	3.36101	4.36583	2.8248	3.63462	5.08085	5.81429	1.94877	1.09876
Cre01.g023900.t1.2	10.1288	13.5682	27.8604	29.4609	2.24076	10.9513	7.70816	19.8676
Cre01.g023913.t1.1	1.44623	0.845371	1.5912	1.55318	3.3274	4.00298	3.27034	5.29528
Cre01.g023950.t1.2	1.98911	2.60606	3.27017	4.35834	1.2746	1.30521	4.41442	5.6805
Cre01.g024000.t1.2	1.01658	0.990379	0.932071	0.248127	0.817794	0.319747	1.92905	1.12793
Cre01.g024050.t1.1	6.1374	6.43914	8.22434	7.92218	6.05764	6.32951	15.6029	15.1252
Cre01.g024100.t1.1	1.67419	2.24268	2.49439	2.0602	3.70373	2.71521	0.728043	0.547317
Cre01.g024150.t1.1	8.8699	11.15	11.5429	10.883	13.2926	14.6018	9.70519	10.9752
Cre01.g024200.t1.2	3.81804	6.25574	4.7736	4.50421	4.30002	7.05526	4.52816	7.71597
Cre01.g024250.t1.2	1.75109	1.82228	1.56903	1.53154	2.0778	1.79002	0.934551	0.797972
Cre01.g024251.t1.1	0.902896	1.46604	0.965809	0.94273	1.33162	1.10638	0.654393	0.721526
Cre01.g024300.t1.1	16.3973	14.1196	29.9714	28.4978	15.9142	16.5622	32.5707	34.3996
Cre01.g024350.t1.1	233.476	228.312	265.029	261.833	101.03	104.168	143.067	140.675
Cre01.g024400.t1.2	1.62983	1.69026	2.41023	1.92916	2.23314	2.27378	2.97219	2.93335
Cre01.g024450.t1.1	30.6425	30.1217	14.1741	13.8354	45.437	39.3988	50.9002	49.8167
Cre01.g024500.t1.2	0	0	0.0294124	0.0287095	0.0283869	0.0277473	0.0279001	0
Cre01.g024550.t1.2	4.90707	3.21604	1.96326	2.07604	5.13178	7.02261	5.81974	3.65562
Cre01.g024600.t1.2	1.9896	6.46105	8.51291	2.37414	0	0	0	0
Cre01.g024650.t1.2	1.52048	1.48129	1.47153	1.39857	2.4667	2.84951	1.02853	1.06777
Cre01.g024750.t1.2	0.472285	0.408989	0.384909	0.187856	0.464362	0.635459	0.13692	0.274483
Cre01.g024800.t1.2	0.0571254	0	0	0	0	0	0	0
Cre01.g024850.t1.2	24.6615	28.3162	22.0057	22.4652	15.7827	17.7126	51.8984	49.1411
Cre01.g024900.t1.2	3.67181	5.9381	3.97254	3.87762	6.10847	5.8438	3.3212	4.41735
Cre01.g024950.t1.1	11.1861	8.73624	16.1047	14.8098	10.0622	10.1553	21.3874	23.0495
Cre01.g025000.t1.1	0	0.167302	1.25962	1.22952	3.34318	1.931	3.4352	3.7427
Cre01.g025024.t1.1	10.3897	13.2549	11.7941	15.2759	17.731	11.1264	20.439	17.468
Cre01.g025050.t1.1	88.2252	90.0686	73.6252	72.516	48.7941	45.1814	34.4604	36.7866
Cre01.g025100.t1.2	5.88095	7.42214	2.69603	4.30626	5.20406	6.12729	3.71987	4.31121
Cre01.g025150.t1.1	25.4983	22.9526	15.8592	14.5461	9.89628	9.93125	7.2625	7.79956
Cre01.g025200.t1.1	1.29927	1.84999	1.37453	1.61002	2.56477	1.90185	0.782313	0.697025
Cre01.g025250.t1.2	19.5716	15.8639	10.4796	9.52859	14.825	13.4076	10.077	8.05326
Cre01.g025300.t1.2	2.04686	1.3294	1.09474	1.52655	1.05657	0.885228	2.07691	2.37919
Cre01.g025350.t1.1	10.745	10.468	6.25206	5.91774	10.4225	12.8686	8.44662	5.94456
Cre01.g025400.t1.1	3.46356	3.56964	1.72152	1.51724	2.80681	2.82241	2.06108	2.35198
Cre01.g025450.t1.1	23.9223	26.6542	15.5048	13.4117	22.1421	19.2648	15.5446	16.8996
Cre01.g025500.t1.2	4.12919	3.79289	4.32677	3.69545	3.02754	2.55114	1.74433	1.85128
Cre01.g025550.t1.1	0.147481	0.28736	0.180295	0.175986	0.60903	0.680352	0.0855123	0.12857
Cre01.g025600.t1.1	2.95145	1.5575	1.24029	1.76095	2.93821	2.97838	5.02695	4.50274
Cre01.g025650.t1.1	280.575	281.981	302.976	309.457	96.9261	104.009	106.831	99.3526
Cre01.g025700.t1.2	0.321532	0.438543	0.383243	0.258982	1.02429	0.945585	0.111858	0.224242
Cre01.g025750.t1.2	0	0.15211	0.143154	0.139734	0.552653	1.6206	0.135794	0
Cre01.g025767.t1.1	0.0913057	0.118603	0.195336	0.0817148	0.37705	0.236928	0.397055	0.451054
Cre01.g025800.t1.2	1.23603	1.41667	1.06661	0.520563	1.1581	0.691784	0.379415	0.316923
Cre01.g025850.t1.1	13.0382	14.0108	12.4977	13.2598	6.92251	7.96264	6.59762	7.33645
Cre01.g025900.t1.1	4.3332	5.01304	2.73142	2.42377	4.0741	4.33369	3.76869	2.83317
Cre01.g025950.t1.1	0.376701	0.209709	0.197363	0.144485	0.523825	0.698212	0.140411	0.281483
Cre01.g026000.t1.2	0.104051	0.202737	0.190801	0.465605	3.13053	1.98	1.35743	2.08629
Cre01.g026050.t1.2	0.144286	0	0.132291	0.0645648	0.255357	0.811211	0.188233	0.377352
Cre01.g026100.t1.1	5.95312	5.18919	7.18187	6.44944	11.6449	9.75643	3.54256	4.91662
Cre01.g026150.t1.2	0.523086	0.509604	0.599501	0.819246	0.578599	0.565562	0.625544	0.342009
Cre01.g026200.t1.1	0.308123	0	0	0	0.272658	0.53303	0.267983	0
Cre01.g026250.t1.1	24.5265	24.9849	25.1002	22.2234	16.5703	17.1652	19.384	20.8492
Cre01.g026300.t1.1	1.81992	2.05296	1.80036	1.4573	2.83947	2.89977	1.66614	1.5448
Cre01.g026350.t1.2	0.155351	0.0756732	0	0	0.27494	0.268745	0.135112	0
Cre01.g026400.t1.2	0.786846	0.919878	0.43286	0.704194	0.139256	0.408355	0.68434	0.27438
Cre01.g026450.t1.1	35.6795	40.4873	30.8547	30.2988	30.4965	29.634	21.863	23.3283
Cre01.g026500.t1.2	2.23687	2.5943	5.37144	6.57768	1.03683	0.644936	4.26149	3.80722
Cre01.g026550.t1.1	26.1453	26.5897	27.8307	28.7636	32.8419	30.2265	28.2854	35.3566
Cre01.g026600.t1.1	149.761	146.752	145.592	141.852	119.632	132.058	112.766	102.363
Cre01.g026650.t1.1	3.43631	3.54467	5.74529	3.79897	4.65063	3.67164	4.57087	5.81514
Cre01.g026700.t1.2	0.118328	0.345833	0.108491	0.105898	0.314125	0.204698	0.205825	0.103155
Cre01.g026750.t1.2	0.20896	0	0	0	0	0	0	0
Cre01.g026800.t1.2	0	0	0	0	0	0.319112	0	0
Cre01.g026850.t1.2	0	0	0	0	0.0579415	0	0	0
Cre01.g026900.t1.1	18.3556	18.9574	10.668	11.9391	12.3375	13.0138	6.54275	6.73303
Cre01.g026950.t1.1	0.578546	0.307437	0.192891	0.235352	1.02391	1.18281	0.320203	0.458509
Cre01.g027000.t1.1	3417.41	3448.21	3758.16	3848.13	2449.76	2484.69	2124.48	2134.66
Cre01.g027050.t1.2	56.632	50.0749	37.5321	39.1143	37.3129	35.1411	28.6425	22.0019
Cre01.g027100.t1.1	15.0695	9.70848	15.1539	13.2691	16.3462	19.1314	15.4317	17.375
Cre01.g027150.t1.2	3.40071	3.86523	2.8293	3.15622	3.06502	4.57565	3.122	3.51365
Cre01.g027200.t1.1	42.251	40.2726	57.3904	66.0558	57.1204	56.5102	90.7327	90.4914
Cre01.g027250.t1.1	1.59338	1.35827	1.55223	1.06951	3.17247	1.80891	3.63774	2.51768
Cre01.g027300.t1.2	0	0.157221	0.739824	0.866575	0.285612	0	1.54393	2.81375
Cre01.g027350.t1.1	0.696051	0.957333	0.675727	0.476364	0.579705	0.637473	0.213661	0.214164
Cre01.g027400.t1.2	0.495629	0.82775	0.64918	0.3802	1.06513	1.2861	0.492641	1.29623
Cre01.g027450.t1.1	2.07868	1.62008	3.81175	1.1162	6.62194	5.03435	9.03942	4.71155
Cre01.g027500.t1.2	11.6415	11.0648	17.4424	14.2303	7.28646	7.36788	5.18591	6.18823
Cre01.g027550.t1.2	12.5416	10.9383	14.7844	11.0104	12.0494	12.5011	13.5049	12.183
Cre01.g027600.t1.2	1.35875	1.4561	1.30808	0.668813	1.26248	0.763923	0.590869	0.473807
Cre01.g027650.t1.1	0.04471	0.348461	0.204966	0.0800272	0.276948	0.193362	0.0388855	0.0779539
Cre01.g027700.t1.1	12.4809	15.4493	10.7702	11.0384	5.71706	5.33423	3.70344	4.09617
Cre01.g027750.t1.2	0	0.30559	0	0	0	0	0	0
Cre01.g027764.t1.1	3.11271	2.33934	2.28316	1.67145	3.30533	3.53856	3.55804	3.25629
Cre01.g027800.t1.1	225.746	223.125	331.009	313.777	103.038	103.062	152.899	155.996
Cre01.g027850.t1.2	4.64239	3.57058	0.896096	3.7174	3.67563	3.38147	2.33756	2.13006
Cre01.g027900.t1.1	23.7232	26.6981	15.7508	10.9817	3.98137	4.24545	3.55736	2.13944
Cre01.g027950.t1.1	12.3635	12.3485	6.95385	6.32278	15.5374	19.2312	10.3915	11.7745
Cre01.g028000.t1.2	0	0	0	0	0.289413	0	0	0
Cre01.g028050.t1.1	0	0.085739	0	0	0	0	0	0
Cre01.g028100.t1.1	19.8257	21.8687	20.8817	22.289	19.7187	17.1485	14.6779	17.9977
Cre01.g028150.t1.1	11.456	11.7984	17.7061	18.1618	11.5856	12.7401	10.5329	11.9844
Cre01.g028200.t1.2	31.2394	30.8884	31.1219	30.9624	40.0215	38.6358	48.3377	47.3946
Cre01.g028250.t1.1	19.3268	17.8377	16.0103	14.2622	13.0518	12.9043	11.3535	10.6412
Cre01.g028300.t1.1	48.1753	48.1302	69.6966	71.9396	40.0943	37.8924	66.8252	68.5291
Cre01.g028350.t1.1	13.8054	11.8672	10.1262	12.0645	9.62937	8.85047	8.89921	7.22107
Cre01.g028400.t1.2	0.460946	0.769827	1.14713	0.883988	1.39849	1.65176	1.83267	1.49255
Cre01.g028423.t1.1	3.86222	3.46166	4.10773	4.28609	2.46073	2.67254	3.35907	2.42422
Cre01.g028450.t1.1	2.51607	1.73027	1.2213	3.31143	3.27422	2.94441	2.57446	1.67733
Cre01.g028500.t1.1	41.2171	44.2469	62.1017	68.7236	15.2165	16.009	44.0674	42.7978
Cre01.g028550.t1.1	4.55654	4.4391	3.0879	3.01411	7.18763	7.53976	6.71977	6.21746
Cre01.g028600.t1.1	30.9875	27.0022	23.9919	24.0349	19.4993	20.6979	20.8119	20.5607
Cre01.g028650.t1.1	40.2441	34.6547	39.9388	37.7704	28.8097	27.5087	27.1359	29.5649
Cre01.g028700.t1.1	9.53916	8.2312	9.24592	11.4642	26.7707	28.5249	34.134	31.1255
Cre01.g028750.t1.1	29.7285	33.9992	31.4049	38.1735	128.674	118.508	107.357	132.963
Cre01.g028777.t1.1	1.12771	0.366213	4.48048	4.037	1.99582	2.60113	5.88477	7.20942
Cre01.g028800.t1.2	1.70886	0	0	3.05871	4.5365	1.47809	2.97247	0
Cre01.g028810.t1.1	16.8814	8.22315	0	0	22.4076	21.9027	22.0233	22.0751
Cre01.g028850.t1.1	18.7868	20.7305	28.6498	35.5141	32.74	35.6503	71.8599	67.5167
Cre01.g028900.t1.2	5.78204	6.12283	4.84037	3.93726	11.3453	8.26293	13.7745	13.4782
Cre01.g028950.t1.1	10.1844	9.17776	4.20199	5.01304	5.63262	3.74388	2.21441	2.21962
Cre01.g029000.t1.1	21.0961	20.0067	14.8919	17.5435	15.5291	16.1481	19.6468	18.7165
Cre01.g029050.t1.1	25.1081	29.0474	27.6969	28.9662	29.1614	23.2446	19.79	21.2046
Cre01.g029100.t1.1	2.17423	1.64748	2.43648	2.16205	3.42041	2.71646	0.840438	1.05302
Cre01.g029150.t1.1	6.69501	4.24717	6.42394	6.40978	9.36884	8.61906	15.8435	16.9666
Cre01.g029200.t1.2	0.266549	0.185485	0.314215	0.204471	0.30326	0.230555	0.496766	0.365152
Cre01.g029250.t1.1	4.73844	7.36114	7.16259	7.5645	3.73975	4.54166	6.01464	5.8055
Cre01.g029300.t1.1	105.999	115.306	122.028	128.046	125.906	124.028	116.305	119.341
Cre01.g029350.t1.1	1.59333	1.34059	1.46087	1.81487	2.49944	3.06956	1.25978	2.20981
Cre01.g029400.t1.1	0.240746	0.175906	0.331099	0.296255	1.22496	0.702798	0.759014	0.655862
Cre01.g029450.t1.2	31.099	24.7429	26.7078	27.1829	23.4833	26.3615	26.4165	27.5631
Cre01.g029500.t1.1	2.60276	2.11306	2.8725	2.3725	4.0519	4.8361	3.81473	4.28591
Cre01.g029550.t1.2	1.94141	1.89137	1.33501	1.25967	3.04937	3.69434	1.39301	1.26935
Cre01.g029600.t1.1	10.3882	10.5253	12.5725	13.7596	7.72175	9.46466	12.6489	13.5239
Cre01.g029650.t1.2	23.0718	26.3013	41.4261	38.7872	20.1327	19.5404	33.5132	37.5728
Cre01.g029700.t1.1	40.5459	43.2406	84.0293	81.3772	34.1807	37.5609	106.626	120.681
Cre01.g029750.t1.2	33.5626	40.4214	31.7417	25.7799	44.4325	46.6315	45.9689	44.6948
Cre01.g029800.t1.1	0.538769	0.612362	0.16466	0.241088	1.50973	0.621353	0.859065	1.40905
Cre01.g029850.t1.1	17.2781	15.7105	25.9228	23.7102	13.1581	15.2166	31.2383	36.6978
Cre01.g029900.t1.1	1.99935	1.66277	1.78843	2.05119	2.07129	2.36205	2.58712	1.61544
Cre01.g029950.t1.1	5.91983	6.82963	10.3555	9.55034	18.3346	20.6165	17.004	15.0748
Cre01.g030000.t1.2	0.38433	0.093606	0.70476	0.687919	5.27146	5.3189	2.75766	3.35048
Cre01.g030050.t1.1	110.052	97.2371	81.201	88.0674	148.21	139.659	129.25	123.952
Cre01.g030100.t1.2	0	0	0	0	0.175277	0.0428319	0.0430678	0
Cre01.g030150.t1.1	5.31984	5.58762	1.98152	1.41343	7.94395	7.54927	3.03634	2.24638
Cre01.g030200.t1.1	62.1488	63.3871	25.5144	24.0746	54.9956	50.0886	34.1141	34.772
Cre01.g030250.t1.1	12.2145	12.8051	4.50397	5.94101	7.87149	8.61283	3.34863	3.81948
Cre01.g030300.t1.2	3.48781	3.28074	1.43352	2.26035	4.78918	4.26516	1.88282	3.25027
Cre01.g030350.t1.1	1.79899	1.16841	0.549811	0.402505	0.928624	1.55606	0.391157	0.261385
Cre01.g030400.t1.2	0	0.239721	0.112804	0.220216	0.217741	0.532088	0.107004	0
Cre01.g030450.t1.2	4.86539	4.35909	4.85921	4.70422	5.9199	5.63622	4.7605	5.71846
Cre01.g030500.t1.1	18.3116	17.6272	18.2384	18.3391	20.5925	20.7885	25.6429	25.3231
Cre01.g030550.t1.1	7.91462	6.96443	8.54412	9.48242	9.37585	7.72918	8.21584	6.00945
Cre01.g030600.t1.2	0.987305	1.36263	0.792074	0.552248	0.946472	0.889564	0.465121	0.609666
Cre01.g030650.t1.1	0.936805	1.62251	0.954363	0.558934	2.67116	3.33124	1.72006	1.90559
Cre01.g030700.t1.2	0.310124	0.402841	0.236953	0.277548	0.914764	0.581199	0.449539	0.450596
Cre01.g030750.t1.2	3.96738	4.50931	2.00824	1.81231	1.17025	0.786417	0.323488	0.432332
Cre01.g030800.t1.1	19.3733	19.1752	19.6525	19.9206	2.82685	2.58489	3.31612	2.96458
Cre01.g030850.t1.1	75.1038	77.8683	91.8628	88.6602	91.6485	87.4969	114.834	113.562
Cre01.g030900.t1.2	0.544668	0.530629	0.0998778	0.194982	0.578373	0.565341	0.37897	0.284896
Cre01.g030950.t1.1	20.7205	23.9354	9.7704	10.8615	8.64394	8.96125	3.08935	2.32246
Cre01.g031000.t1.2	25.5341	27.039	19.747	20.07	44.4043	46.3806	27.1319	29.1314
Cre01.g031004.t1.1	0	0	0	0.193619	1.24438	0.748519	0.658561	0.565809
Cre01.g031050.t1.1	4.96582	4.58321	4.553	4.15182	6.12883	6.44287	5.39863	5.24044
Cre01.g031100.t1.1	110.077	103.63	100.279	95.6723	209.643	202.631	200.832	203.304
Cre01.g031200.t1.1	27.175	29.2747	35.4572	31.336	35.1458	32.7718	36.5884	37.3579
Cre01.g031250.t1.1	19.4107	17.7285	15.1275	15.8517	22.1148	21.4066	14.1387	15.2295
Cre01.g031300.t1.2	2.79701	2.49001	4.24467	4.05692	7.16918	6.54881	19.4191	19.5909
Cre01.g031350.t1.1	0.283433	0.0690318	0.51974	0.190245	0.689727	0.919345	0.184882	0.247088
Cre01.g031450.t1.1	0.502786	0.195931	0.276593	0.269983	0.533899	0.608847	0.524743	0.61364
Cre01.g031500.t1.1	0.330812	0.322285	0.758276	0.444094	3.14691	2.71833	2.15787	3.31651
Cre01.g031550.t1.2	2.9269	2.37622	1.49088	2.18288	2.01446	0.984534	1.55564	1.98457
Cre01.g031600.t1.1	19.5503	19.4235	58.0345	41.7496	20.0407	20.5937	48.6533	50.9614
Cre01.g031650.t1.2	0.202209	0.295496	10.5678	10.8581	0.626273	0.437259	1.0552	1.05768
Cre01.g031700.t1.2	0	0	1.21037	1.18144	1.55756	1.14185	0.382711	0
Cre01.g031750.t1.1	0.829351	0.346275	0.325888	0.212067	0.943577	0.717357	0.412176	0.309859
Cre01.g031800.t1.2	2.07336	1.76743	1.06931	1.7396	1.77739	2.35381	1.23974	0.960234
Cre01.g031850.t1.1	1.12316	0.364737	1.37305	1.34024	1.98777	2.10489	1.62807	1.30552
Cre01.g031900.t1.2	6.45761	5.90756	2.67157	3.45348	5.36591	5.92617	4.17801	2.88343
Cre01.g031950.t1.2	0.0412046	0	0	0	0.109386	0	0	0
Cre01.g032000.t1.2	0.841521	1.84462	0.192891	0	1.67549	2.54759	0	0.183403
Cre01.g032050.t1.1	15.0737	15.3101	20.4369	21.3837	13.6226	13.3156	31.7988	26.5613
Cre01.g032100.t1.2	18.7671	19.4381	23.9086	21.2157	11.7123	7.3475	18.8994	18.9439
Cre01.g032139.t1.1	0	1.40603	1.32325	0	2.12852	1.66445	4.60245	2.09694
Cre01.g032150.t1.2	13.706	14.3668	8.5898	8.69508	11.3608	11.3299	9.05349	9.7554
Cre01.g032200.t1.1	0	0.0419808	0	0.0385651	0.0381317	0.074545	0.0374778	0.0751319
Cre01.g032250.t1.2	8.17694	6.16736	9.91561	8.26228	6.88566	7.52905	7.79992	7.01345
Cre01.g032300.t1.1	646.063	638.233	545.067	541.908	639.463	636.463	484.341	464.201
Cre01.g032350.t1.1	7.10942	5.32783	4.3456	6.68892	4.83933	6.62241	4.75634	3.97294
Cre01.g032400.t1.1	0.9858	0.746971	0.702993	0.588167	4.0709	3.78969	2.85792	3.05562
Cre01.g032450.t1.1	5.67403	7.14703	5.72782	6.25777	7.30321	8.03098	6.77919	5.84582
Cre01.g032500.t1.1	19.0588	22.3734	20.5135	19.3876	16.7604	15.4613	19.9735	16.2022
Cre01.g032550.t1.2	0.127519	0.0828213	0.0389726	0.0760826	0.188069	0.29413	0.0369688	0
Cre01.g032600.t1.2	41.1716	44.6909	62.2157	53.2232	36.2079	39.0192	46.0862	48.4102
Cre01.g032650.t1.1	172.981	174.572	119.425	121.335	292.535	288.885	212.939	203.257
Cre01.g032700.t1.1	26.7724	25.7251	26.9006	25.4372	21.2569	24.1088	18.9786	16.7852
Cre01.g032750.t1.1	1.79705	3.00126	2.58918	2.98682	6.58803	8.66014	6.25178	8.50451
Cre01.g032800.t1.1	5.15503	4.93846	2.28446	2.53744	4.48566	3.86438	1.79338	2.1721
Cre01.g032850.t1.2	0	0.056747	0	0	0	0	0	0.0507792
Cre01.g032900.t1.2	1.80716	1.64321	1.98831	3.77377	3.73136	2.81362	3.56259	3.88606
Cre01.g032950.t1.1	114.512	113.068	140.463	138.768	52.857	45.5089	62.9866	64.2141
Cre01.g033000.t1.1	2.74287	2.07324	3.25196	3.51284	2.7201	2.86334	4.48318	5.19459
Cre01.g033050.t1.2	2.13648	2.73185	3.30559	2.15107	3.42666	2.30997	3.25176	2.21174
Cre01.g033100.t1.1	13.0866	15.2323	11.1448	13.0718	12.4911	13.1	10.8276	10.383
Cre01.g033101.t1.2	1.10096	1.45565	1.73046	1.54835	1.32219	1.42844	1.23112	1.57679
Cre01.g033150.t1.1	21.4566	17.4621	18.2334	17.6806	18.2923	17.8802	20.2544	21.8988
Cre01.g033200.t1.1	0.284373	0.83113	0.521465	0.509004	2.3906	0.983888	0.74198	1.3635
Cre01.g033250.t1.1	3.25739	4.44281	3.31844	3.62784	3.71518	4.00714	5.28834	5.5532
Cre01.g033300.t1.1	2.91211	2.55335	215.738	230.259	1.675	1.63726	0.633184	1.14241
Cre01.g033350.t1.1	35.3449	36.1187	60.1553	57.1701	24.1988	24.9624	36.3807	39.8586
Cre01.g033400.t1.1	36.2106	33.9205	35.0246	37.3927	47.5361	53.3487	43.2601	42.8415
Cre01.g033450.t1.1	1.02298	1.70848	0.669956	0.653947	3.10367	3.53936	1.65233	1.65621
Cre01.g033500.t1.1	5.12264	2.80721	1.46774	1.2894	7.50782	5.81554	3.34147	3.90755
Cre01.g033524.t1.1	3.33467	3.24872	3.23731	2.9844	2.6037	2.88437	1.02362	2.22306
Cre01.g033550.t1.1	635.255	622.099	748.396	732.089	382.098	379.583	513.813	513.102
Cre01.g033600.t1.1	22.0867	28.1888	19.101	17.6088	16.5574	18.8539	23.068	21.9452
Cre01.g033650.t1.1	0.320349	0.312092	0.146859	0	0.141738	0.27709	0	0.139636
Cre01.g033700.t1.1	11.2688	11.4773	2.91174	4.49244	5.98304	6.20267	4.54398	4.19744
Cre01.g033750.t1.2	0.323136	0.629615	0.197515	0.289193	0.381258	1.02484	0.4684	0.563402
Cre01.g033763.t1.1	1.55611	2.274	6.42035	2.08898	6.19651	2.69195	3.38347	2.03486
Cre01.g033800.t1.1	0	0	0	0	0.187155	0.182938	0	0.184378
Cre01.g033850.t1.1	8.77763	8.83643	12.6084	11.2597	10.6153	8.35155	8.39754	8.92743
Cre01.g033900.t1.2	0.0675912	0.197547	0	0	0.299058	0.409247	0.411501	0.294621
Cre01.g033950.t1.2	1.77018	1.826	1.52755	0.931906	1.19786	1.44107	0.996194	1.45242
Cre01.g034000.t1.1	116.914	110.371	119.419	118.585	64.3131	61.5039	76.6491	73.2532
Cre01.g034050.t1.1	21.2331	21.5426	16.8185	15.517	17.8998	21.6261	16.063	17.0866
Cre01.g034100.t1.2	1.91176	1.92457	1.63597	1.71094	1.1842	2.03944	1.33017	1.38885
Cre01.g034150.t1.2	1.90407	2.85383	2.35009	2.58887	4.5363	4.90917	4.23559	4.27747
Cre01.g034200.t1.2	6.87621	6.29185	3.48319	3.26396	6.21923	7.2292	2.64328	2.91445
Cre01.g034250.t1.1	0.217782	0.848675	0.599032	0.584718	0.770862	0.753494	0	0
Cre01.g034300.t1.1	0.284906	0.092521	0.174148	0.0849931	0.336152	0.328578	0.165193	0.0827911
Cre01.g034342.t1.1	3.69874	4.06538	4.69558	5.26239	6.71388	6.97276	6.51626	6.61427
Cre01.g034350.t1.2	0.0652632	0	0.239351	0.116816	0.115503	0.225801	0.283805	0.398262
Cre01.g034380.t1.1	3.77958	5.35587	1.68018	2.25504	2.6351	2.57573	1.99224	2.09677
Cre01.g034400.t1.1	198.849	199.474	108.109	100.798	128.259	130.072	92.9573	92.9051
Cre01.g034450.t1.2	75.0634	77.1376	74.0272	62.9879	54.3695	50.8124	76.8852	69.2729
Cre01.g034500.t1.1	0	0	0.0245991	0.0240112	0.16619	0.0696194	0.0466685	0.0467783
Cre01.g034550.t1.1	10.7132	13.4191	8.41937	9.58788	16.9288	17.8712	15.973	15.7881
Cre01.g034600.t1.1	3.2513	3.21275	9.0282	9.76854	2.79487	2.28998	14.0983	13.2002
Cre01.g034650.t1.1	1.73573	1.93256	2.27348	1.92327	1.02397	1.71582	1.79715	1.36905
Cre01.g034700.t1.2	1.74891	2.38537	1.17592	1.04347	3.1984	3.12634	1.72388	1.32136
Cre01.g034750.t1.2	1.00466	1.34581	3.10886	1.46109	0.889029	1.62937	0.983006	0.10948
Cre01.g034800.t1.2	11.7394	10.5126	6.41458	6.79192	11.3326	14.6671	6.60043	6.71933
Cre01.g034822.t1.1	1.05389	1.74544	4.83139	4.24435	19.5844	17.4111	46.3798	45.9376
Cre01.g034850.t1.2	0.0989146	0	0.362766	0.0885244	0.875296	1.71115	4.64554	4.48401
Cre01.g034900.t1.1	0.991258	0.702333	0.0826229	0.161297	0.71768	0.779455	0.313499	0.235677
Cre01.g034950.t1.1	18.5227	18.0453	12.3951	13.5131	13.9827	12.5286	9.46731	9.10694
Cre01.g035000.t1.1	7.27634	6.3426	4.79875	4.68408	4.85737	4.96876	2.2205	2.55958
Cre01.g035050.t1.1	0	0.409297	0	1.12799	0	0.363393	0	0
Cre01.g035100.t1.1	18.4324	18.2188	13.9466	15.2149	18.2903	18.5747	14.9416	13.0267
Cre01.g035150.t1.2	6.41805	4.10887	5.21199	3.61044	4.21894	4.75832	4.78452	4.79578
Cre01.g035200.t1.1	1.45834	0.887971	1.67138	0.652578	1.77442	2.20747	2.06108	2.7016
Cre01.g035250.t1.1	0	0	0	0	0.12318	0.240809	0.121068	0.121352
Cre01.g035300.t1.1	0	0	0	0	0.168824	0	0.331858	0.498958
Cre01.g035350.t1.1	15.8246	14.9677	17.7489	15.8123	15.4987	13.5548	22.3148	19.1529
Cre01.g035393.t1.1	22.9748	23.9672	22.7425	19.7426	25.5479	26.9947	30.3263	29.1569
Cre01.g035400.t1.2	0.126726	0	0.116191	0.340243	0.560699	0.548065	0.881734	0.662856
Cre01.g035450.t1.1	14.2425	10.3075	52.6072	47.162	21.6055	22.8786	82.8166	84.7852
Cre01.g035500.t1.1	8.29625	6.81576	10.0475	10.1952	3.23239	3.53442	5.81544	5.8831
Cre01.g035550.t1.2	0.116937	0	0.107216	0	0.103477	0.101146	0	0
Cre01.g035600.t1.2	0	0	0.15357	0.299801	0	0	0	0.146017
Cre01.g035650.t1.1	0.35791	0.261514	4.8403	6.7266	0.633429	0.928736	3.50194	3.35417
Cre01.g035700.t1.1	1.2841	1.35526	2.45282	3.44766	1.89384	2.49908	7.07318	6.90324
Cre01.g035750.t1.1	4.39516	3.8231	2.80646	2.73939	5.90337	6.17768	9.35168	8.48421
Cre01.g035800.t1.1	1.50039	2.40754	3.72238	3.00153	1.6401	2.2902	5.8338	5.30894
Cre01.g035850.t1.1	18.4685	20.2751	21.7983	23.8677	16.5867	16.3322	30.8664	28.5961
Cre01.g035900.t1.2	0.5181	0.757119	0.712543	0.811436	0.916934	0.616188	1.12651	1.24208
Cre01.g035950.t1.2	2.65075	3.76894	2.95587	3.78287	3.29659	2.91247	3.36467	2.81049
Cre01.g036000.t1.2	1.94026	2.57074	24.0515	22.7822	3.91461	4.16206	17.9549	16.441
Cre01.g036050.t1.1	0	0.0776213	0.146103	0.142611	0.634539	0.551326	0.0692953	0.277833
Cre01.g036100.t1.2	0.0374588	0.0729865	0.0686895	0.033524	0.397767	0.226803	0.162894	0.163277
Cre01.g036150.t1.1	1.34205	1.30746	1.10744	1.50135	3.38462	2.96011	4.02691	3.74389
Cre01.g036200.t1.1	7.46654	6.76894	8.65236	6.86786	9.26836	11.5711	9.2898	8.58842
Cre01.g036250.t1.1	1.24843	1.32051	2.02766	2.07498	2.33574	2.34481	5.98738	6.84105
Cre01.g036300.t1.2	0.836287	0.640146	1.7526	1.17612	0.740031	0.568352	1.35078	1.4581
Cre01.g036350.t1.2	0.418592	0.349546	0.328966	0.481658	1.21707	0.982753	1.71629	1.77245
Cre01.g036400.t1.1	7.47968	9.6187	9.18956	6.82789	15.8851	17.3387	11.059	9.52004
Cre01.g036450.t1.1	1.20931	0.785424	0	0	0.356705	1.046	1.40235	0.351413
Cre01.g036500.t1.1	0	0	0	0.148738	0.147066	0	0.144544	0
Cre01.g036550.t1.1	34.8451	34.1592	44.1287	42.8793	24.0894	20.9094	30.1163	30.7567
Cre01.g036600.t1.1	0.905668	0.784289	0.369057	1.17077	1.42476	1.65378	0.875204	1.05272
Cre01.g036650.t1.2	6.1753	6.19844	6.26244	6.95016	5.21614	7.36466	8.54448	8.07518
Cre01.g036700.t1.1	2.79083	2.89432	5.77799	4.83422	6.05453	5.52876	20.5926	19.2283
Cre01.g036750.t1.1	9.32718	6.40204	6.02512	7.968	6.94055	6.2341	4.7935	4.61998
Cre01.g036800.t1.2	4.11134	4.50604	4.55488	2.98958	4.39607	3.25981	3.27776	2.83745
Cre01.g036850.t1.1	21.7782	21.2169	17.7713	15.0078	18.2116	19.7792	17.4258	15.3784
Cre01.g036900.t1.2	1.572	1.53148	1.16678	1.54086	1.58979	1.55397	2.34379	2.15353
Cre01.g036950.t1.1	1.87951	1.83107	1.12012	1.26156	6.81904	6.82796	0.980795	0.983102
Cre01.g037000.t1.2	0.250601	0.244142	0.114884	0.224278	2.43933	2.27599	1.08977	0.764635
Cre01.g037050.t1.1	15.9788	14.606	10.1287	10.4163	14.6633	11.0909	6.86279	7.39485
Cre01.g037100.t1.1	0	0.200269	0	0.091987	0.454766	0.44452	0.178787	0.179208
Cre01.g037150.t1.2	12.2078	11.3044	5.59647	5.24639	5.5083	4.60009	3.15369	2.26546
Cre01.g037200.t1.1	53.4511	50.1328	39.5714	39.5171	44.0673	52.2636	35.2268	32.9943
Cre01.g037250.t1.1	47.5814	50.5298	40.7807	38.3515	51.9119	57.1329	37.5272	44.8295
Cre01.g037300.t1.1	0	0.355965	0	0	0.538879	0.105347	0.105928	0
Cre01.g037350.t1.2	4.13065	3.35348	2.3986	2.09483	3.77705	4.04924	2.63452	2.16059
Cre01.g037400.t1.2	8.9972	9.36566	4.85914	7.16969	6.10755	7.67563	6.75316	4.72759
Cre01.g037450.t1.2	0.295458	0.215882	0.067724	0.0661057	0.130726	0.0638901	0	0.0643931
Cre01.g037550.t1.2	0	0	0	0.0237053	0.0234389	0	0	0
Cre01.g037600.t1.2	0.10887	0.159096	0.149729	0.146151	0.240847	0.188337	0.189374	0.427093
Cre01.g037650.t1.1	22.9878	20.251	15.6954	13.1318	14.7154	15.0184	15.5265	14.4971
Cre01.g037700.t1.1	28.3284	29.5773	20.1785	20.5044	23.4698	25.1863	16.1962	18.0053
Cre01.g037750.t1.2	0.499182	0.364737	0.228842	0	0.331295	0.107943	0.434151	0.108793
Cre01.g037800.t1.1	13.8091	15.4003	14.4936	11.2203	18.4903	16.9735	23.5461	26.4527
Cre01.g037850.t1.1	212.353	213.876	148.605	165.9	198.045	203.489	152.782	161.602
Cre01.g037900.t1.2	11.0006	6.87509	3.99638	7.98751	9.18343	7.36074	4.69349	5.06642
Cre01.g037950.t1.2	0.0722364	0.140749	0.728543	0.646485	0.767064	0.499854	0.942387	0.944604
Cre01.g038000.t1.2	1.46823	1.66878	1.08976	1.06371	1.63951	1.63281	1.42897	1.40186
Cre01.g038050.t1.2	3.46918	3.53338	2.28437	2.39914	2.93034	3.2735	0.850311	0.687348
Cre01.g038100.t1.1	75.1138	78.4718	61.2351	66.7531	103.076	102.725	113.505	122.559
Cre01.g038150.t1.2	0.296449	0.173285	0.326165	0.159186	0.629587	1.02567	0.257829	0.413497
Cre01.g038200.t1.1	15.9878	15.9219	15.9617	19.5549	13.2045	14.1362	13.4415	14.0926
Cre01.g038250.t1.1	35.9454	31.3465	63.4457	67.8334	54.6814	56.3605	102.101	93.1871
Cre01.g038300.t1.1	2.81357	2.74105	2.79464	1.88852	4.77198	4.46166	3.05879	2.65719
Cre01.g038350.t1.2	0.370075	0.240358	1.13103	0.993606	0.65496	0.533502	0.643728	0.860323
Cre01.g038400.t1.1	612.599	593.532	752.538	765.92	704.468	691.869	977.926	975.827
Cre01.g038450.t1.1	0.334252	0.434182	0	0.0997139	0.59156	0.770975	0.38761	0.388522
Cre01.g038500.t1.1	2.21295	1.96844	0.793951	0.430544	1.27712	0.915449	0.167362	0.503267
Cre01.g038550.t1.2	9.83459	8.75124	7.95201	6.93035	11.7177	10.6499	9.56364	8.4385
Cre01.g038600.t1.1	143.06	140.123	81.2436	79.5321	98.1842	100.637	55.7335	55.8646
Cre01.g038650.t1.1	33.53	28.5825	19.5343	19.849	32.4523	30.9659	23.9978	18.5735
Cre01.g038700.t1.1	4.97656	6.60492	5.88542	4.84111	6.25462	5.24031	4.39098	3.52104
Cre01.g038750.t1.1	5.3566	5.91434	3.2742	3.03616	6.47809	4.63326	7.91992	4.20276
Cre01.g038800.t1.1	7.11709	7.88532	5.11798	4.87079	6.05094	5.06966	4.12661	3.16307
Cre01.g038850.t1.2	24.1156	27.066	28.5026	27.1745	20.2889	20.5911	27.0371	25.3
Cre01.g038900.t1.1	0.362215	0.882197	0.332103	0.972502	0.320524	0.626605	2.52022	3.31557
Cre01.g038950.t1.1	37.9539	35.7223	50.4287	41.1636	30.17	23.6478	24.0578	24.9556
Cre01.g039000.t1.2	0.17804	0	0	0	0	0.153998	0.0774229	0
Cre01.g039050.t1.2	0.746465	0.472696	0.71863	0.634652	1.0899	1.58188	0.876447	0.943583
Cre01.g039100.t1.2	0	1.12134	1.05532	0	1.01853	0	0	1.00341
Cre01.g039150.t1.1	20.3152	22.2105	15.5219	13.9389	33.7566	28.115	20.0244	23.4168
Cre01.g039200.t1.1	10.1959	8.03102	3.5802	5.04782	18.0447	14.073	10.943	11.1579
Cre01.g039250.t1.2	1602.45	1572.1	1787.71	1819.34	2501.71	2501.78	2339.82	2345.57
Cre01.g039300.t1.1	604.25	604.776	552.539	546.731	638.681	631.874	659.894	658.987
Cre01.g039350.t1.1	8.49694	9.89546	22.2971	21.1525	13.4823	11.5734	40.9423	39.5061
Cre01.g039400.t1.1	5.2664	5.37116	7.92191	7.06982	6.55347	7.54462	15.7449	15.208
Cre01.g039450.t1.2	0.161756	0.157586	0	0	0	0	0	0
Cre01.g039500.t1.1	2.18049	1.63407	0.51262	0.600445	1.97899	1.9344	0.632142	0.974814
Cre01.g039550.t1.2	9.11281	9.30069	13.7044	13.7221	4.4373	5.12971	9.35142	9.75172
Cre01.g039600.t1.2	0.462557	0.327734	0.346994	0.602137	0.446528	0.618328	0.329153	0.219951
Cre01.g039650.t1.1	0	0.990379	0	0	0	0	0	0
Cre01.g039700.t1.2	3.23888	6.31079	2.96962	1.44933	12.8974	7.00377	4.2254	4.23534
Cre01.g039718.t1.1	0.13071	0.254682	0	0.11698	1.38799	1.01753	0.909456	0.455798
Cre01.g039750.t1.1	8.45494	7.7794	7.75206	6.72606	9.56006	6.90692	10.2132	8.59924
Cre01.g039800.t1.2	0.672515	0.536057	0.896883	0.984883	2.86734	1.05764	1.11663	1.06596
Cre01.g039850.t1.2	1.04323	1.29353	0.347821	0.424387	0.755311	0.164065	0.247453	0.165357
Cre01.g039900.t1.1	4.94555	3.51148	1.92136	1.6504	2.52195	2.10261	1.60386	1.24226
Cre01.g039950.t1.1	3.25522	3.38754	5.49439	7.08459	3.33882	3.71153	4.18238	3.80525
Cre01.g040000.t1.1	1242.64	1219.84	1353.74	1384.44	1858.97	1854.72	1651.26	1634.5
Cre01.g040050.t1.2	1.28955	1.77978	0.788233	1.25027	3.23319	4.18281	4.20584	3.65364
Cre01.g040100.t1.1	16.6295	13.0507	9.74114	10.0596	11.7178	10.6547	12.99	14.7655
Cre01.g040150.t1.1	0.0811134	0.316091	0.371851	0.435559	0.215332	0.3508	0.423278	0.0707124
Cre01.g040200.t1.1	14.0662	15.8715	13.4069	13.1577	13.2911	14.0227	14.5146	14.4102
Cre01.g040250.t1.1	17.4023	19.762	17.2281	20.6384	9.91979	7.84937	11.3282	11.0756
Cre01.g040300.t1.1	20.0197	18.9411	11.1191	12.4039	7.32466	8.82465	7.70131	7.88724
Cre01.g040350.t1.2	1.91054	2.11802	1.20808	1.41505	2.33191	2.9062	1.60435	1.37839
Cre01.g040379.t1.1	0.419619	0.654086	0.384736	0.600867	0.891172	0.72591	0.656917	1.09744
Cre01.g040400.t1.1	17.7672	22.0553	13.4	12.8233	9.63618	7.93184	5.7324	7.49464
Cre01.g040450.t1.1	5.64029	6.02327	5.5692	6.50392	11.9978	10.2264	4.62249	3.49866
Cre01.g040500.t1.1	27.3026	28.1744	22.1545	23.1576	18.9408	18.0204	21.1809	18.3281
Cre01.g040550.t1.2	2.89887	3.19252	3.23568	3.38396	3.12287	3.27054	2.85007	3.40616
Cre01.g040600.t1.2	1.92724	1.93279	1.40323	1.87699	1.50478	1.47088	1.18318	1.87778
Cre01.g040650.t1.2	0.344732	2.35093	0.948221	0.925562	2.13537	0.29818	0.299822	1.80316
Cre01.g040700.t1.2	20.6116	19.5226	18.8981	14.6035	54.4644	67.3513	49.7957	58.3981
Cre01.g040750.t1.1	0	1.53313	0.480956	0.469463	5.10606	4.99101	5.01849	10.0606
Cre01.g040800.t1.2	1.62416	0.395574	1.11685	1.09017	1.43722	1.05363	0.706287	0.353974
Cre01.g040850.t1.1	1.42199	1.22236	0.613543	0.898323	1.99851	1.80878	0.872996	1.02089
Cre01.g040900.t1.2	13.1855	12.8456	15.1117	16.0149	15.0015	16.2928	21.9116	21.7579
Cre01.g040950.t1.1	14.541	15.269	9.50019	9.6628	12.6362	11.8243	6.73986	8.50158
Cre01.g041000.t1.2	20.3666	21.0088	9.33674	15.5468	59.8981	49.7403	35.9477	35.5101
Cre01.g041050.t1.2	11.8918	10.3599	9.54033	9.21003	10.0172	8.80243	12.1327	11.0647
Cre01.g041082.t1.1	7.02557	10.6693	3.97859	3.88352	8.04545	8.0429	5.57118	4.86373
Cre01.g041100.t1.2	16.1914	12.2003	11.8299	17.0945	7.83552	8.86253	9.3514	8.9323
Cre01.g041150.t1.2	2.18571	1.7558	1.05474	1.20112	4.07186	3.28359	1.00051	0.902575
Cre01.g041200.t1.2	1.04024	1.4032	2.49445	1.79032	2.05344	3.73749	3.96685	3.83667
Cre01.g041250.t1.2	0	0	0	0	0.974242	0.952291	4.78768	2.87936
Cre01.g041256.t1.1	22.8797	23.0299	17.4088	14.7838	8.73697	10.593	10.5688	9.93154
Cre01.g041300.t1.1	3.187	3.72582	2.80517	2.39587	4.39947	4.41061	2.99356	3.22287
Cre01.g041350.t1.1	1.03164	3.01516	2.3647	1.38491	5.47741	5.57707	3.14036	2.02355
Cre01.g041400.t1.1	2.15925	4.20719	5.54329	2.70542	4.20359	2.61474	6.00946	4.14122
Cre01.g041450.t1.2	6.28884	6.46712	4.4847	5.70642	8.19292	9.51932	4.86184	3.95954
Cre01.g041500.t1.1	1.72378	1.23482	1.30157	2.13258	2.10861	1.53486	1.23465	1.28175
Cre01.g041550.t1.2	0.421525	0.41066	0.154593	0.226348	1.11902	0.364603	0.366611	0.440968
Cre01.g041650.t1.2	5.8866	3.91014	14.4744	14.368	14.6801	18.5152	25.1332	22.8597
Cre01.g041751.t1.1	0	0	0	0	0	0	0.428015	0.429022
Cre01.g041800.t1.1	0.119546	0.23293	0	0.106989	0.211574	0.31021	0	0
Cre01.g041850.t1.2	2.56097	1.61439	2.20995	3.37053	2.53282	2.21515	2.09632	1.96993
Cre01.g041855.t1.1	6.37886	3.68263	5.84857	4.65162	4.59935	1.02175	1.43833	2.05959
Cre01.g041900.t1.2	1.12543	1.82737	1.80577	1.42688	2.32375	1.62242	3.99682	4.74206
Cre01.g041950.t1.1	7.5151	6.61287	9.11304	6.07482	8.72381	8.24766	13.4236	12.328
Cre01.g042000.t1.1	0.240984	0.234773	0.189386	0.123241	0.335103	0.23822	0.119766	0.0600238
Cre01.g042050.t1.1	28.614	35.2773	23.6814	24.022	17.9261	15.1128	13.214	15.0111
Cre01.g042100.t1.1	0	0	0	0	0	0	0.0310744	0
Cre01.g042150.t1.2	7.21977	5.67232	5.97897	5.41923	4.22484	4.33109	3.24089	2.33487
Cre01.g042200.t1.1	725.769	694.631	1155.09	1142.53	541.988	520.623	928.694	946.344
Cre01.g042250.t1.2	1.24294	1.332	0.85471	1.4461	1.26486	1.45138	0.810764	0.758493
Cre01.g042300.t1.2	1.29857	1.3837	2.86492	2.94173	2.54958	3.54515	7.69404	8.63194
Cre01.g042350.t1.2	0.991964	1.15968	0.3638	0.53266	2.63337	2.05923	1.89802	0.864766
Cre01.g042356.t1.1	2.56722	2.81368	0.294225	1.14878	1.7038	0.832706	1.67458	1.11902
Cre01.g042400.t1.2	0	0	0.148914	0	0	0	0	0
Cre01.g042450.t1.2	0.624028	0.58031	0.364096	0.279239	1.0793	1.07952	0.271367	0.32146
Cre01.g042500.t1.2	0	0.62097	0	1.14089	0	0	0	0
Cre01.g042538.t1.1	0.787291	0.1534	0.144368	0	0.696674	0.408586	0.136945	0
Cre01.g042550.t1.1	37.4786	40.5785	45.9958	44.2243	31.3921	29.8184	30.4182	29.1071
Cre01.g042600.t1.1	0	0	0	0	0	0.725691	0	0
Cre01.g042700.t1.1	0.315451	0	0	0	1.11657	1.09141	0	0
Cre01.g042750.t1.1	296.652	284.311	251.041	251.371	489.322	481.052	413.134	416.003
Cre01.g042800.t1.1	78.046	82.589	68.7202	70.6909	73.5877	71.8133	62.3781	68.8594
Cre01.g042850.t1.1	9.44587	13.0546	11.4803	6.88089	10.8857	9.88039	7.06899	5.5536
Cre01.g042900.t1.1	1.97749	2.06413	0.906548	1.0113	3.99973	4.76483	1.10563	1.72392
Cre01.g042950.t1.1	43.6407	40.1298	44.504	48.8207	31.5246	34.6661	41.4411	38.2388
Cre01.g043000.t1.2	2.18232	2.22271	2.45565	1.95309	1.49224	1.97343	1.12156	1.1242
Cre01.g043050.t1.1	8.1629	8.31954	6.6783	5.05762	9.44593	9.55897	3.71358	5.69295
Cre01.g043100.t1.1	15.9749	15.8461	17.5762	16.8962	14.3932	17.0836	10.8624	11.1411
Cre01.g043150.t1.1	12.9953	14.4927	13.0124	12.3954	14.8283	17.0085	10.41	8.19855
Cre01.g043200.t1.1	52.6351	56.1443	50.0207	49.1693	52.0165	46.8566	28.0683	38.5173
Cre01.g043250.t1.2	0.887363	0.605144	0.813595	0.873569	0.706706	1.22806	0.385881	0.464147
Cre01.g043300.t1.1	3.06513	2.61286	3.86418	4.45764	2.88185	2.65122	1.33291	2.33808
Cre01.g043350.t1.1	118.929	115.382	110.628	115.724	101.377	99.8768	79.797	81.2053
Cre01.g043400.t1.1	0.741088	1.13455	2.13551	1.61073	1.31158	2.56405	2.85441	3.41489
Cre01.g043450.t1.1	24.0573	21.1782	17.2739	19.1957	16.1586	19.0537	12.3523	16.9296
Cre01.g043500.t1.1	1.78114	2.80307	0.879347	1.34881	2.42482	2.37019	0.59581	0.597212
Cre01.g043550.t1.2	0	0.0478765	0.0901155	0.0879622	0.434868	0.467577	0.299187	0.128525
Cre01.g043600.t1.2	0.972471	0.947405	2.54751	1.98931	2.95042	2.76378	1.57074	1.93777
Cre01.g043650.t1.2	2.64991	2.95041	1.52719	1.35518	1.87593	1.37524	0.790181	0.858043
Cre01.g043700.t1.1	1.62348	1.92056	0.637937	0.518911	1.84709	0.702126	0.201712	0.404373
Cre01.g043750.t1.1	2.41121	2.63095	1.1496	1.29476	4.01133	3.67067	1.92933	2.10203
Cre01.g043800.t1.2	0.55731	0.651534	0.408783	0.399015	1.18359	1.54257	0.290824	0.583016
Cre01.g043850.t1.2	1.38227	1.08388	1.05098	1.53879	1.64084	2.12877	1.58337	1.52832
Cre01.g043950.t1.2	4.34295	4.34692	0.98184	0.745405	5.21184	5.55754	0.879615	0.570502
Cre01.g044000.t1.2	32.5163	28.6249	23.3477	24.5428	37.0938	33.886	23.5101	30.7375
Cre01.g044050.t1.1	392.268	403.433	408.771	418.916	123.242	120.821	127.22	109.918
Cre01.g044100.t1.1	8.21258	8.30863	7.48158	7.86818	8.80464	8.33304	6.68483	7.84791
Cre01.g044150.t1.2	0.464549	0.452575	0.255558	1.1641	1.06881	0.964361	0.40403	0.647969
Cre01.g044200.t1.1	3.66826	3.33547	2.24221	0.875451	1.51482	2.96138	3.19038	3.83746
Cre01.g044250.t1.2	1.04245	1.01558	0.45878	0.559771	0.922467	1.11809	0.18133	0.254459
Cre01.g044300.t1.1	0	0	0.0803863	0	0.0775836	0	0	0
Cre01.g044350.t1.2	1.28955	1.62856	1.31372	1.32507	1.94414	1.81771	1.20463	0.874374
Cre01.g044400.t1.1	9.07376	11.5124	6.96511	5.66556	16.0588	17.5221	7.52463	9.014
Cre01.g044450.t1.2	0.387404	0.503225	0.591997	0.23114	0.799899	0.558483	0.449247	0
Cre01.g044500.t1.2	0.252342	0.163892	0.154243	0.0752785	0.409379	0.254644	0.036578	0.146656
Cre01.g044550.t1.1	21.901	21.3365	19.5146	19.8765	19.3802	19.4771	11.8043	11.8321
Cre01.g044600.t1.1	19.4172	18.2455	16.2524	14.9672	15.7966	16.741	10.1326	11.1393
Cre01.g044650.t1.1	10.2112	10.696	6.89856	7.48954	13.5878	9.89485	5.47547	5.88994
Cre01.g044700.t1.1	7.52475	9.19457	5.02823	6.73434	8.69011	9.92841	6.32262	6.44868
Cre01.g044750.t1.2	2.73185	2.04726	1.83039	1.88068	3.34719	2.72648	1.73628	2.74794
Cre01.g044800.t1.1	181.651	192.483	185.013	188.811	370.62	365.767	392.916	398.541
Cre01.g044850.t1.1	1.29683	1.08868	1.44201	1.18531	1.3429	1.64677	2.43576	2.08068
Cre01.g044900.t1.1	1.23797	2.23983	0.729678	0.870518	2.34746	2.44754	1.07669	0.925052
Cre01.g045000.t1.1	0.458885	1.04313	0.841474	0.821366	1.62427	1.85229	1.06428	0.800087
Cre01.g045050.t1.1	0	0.242723	0	0	0	0.215501	0.108344	0
Cre01.g045100.t1.1	94.958	108.546	110.281	114.444	85.8957	87.7933	104.427	102.281
Cre01.g045150.t1.1	1.05553	1.02833	0.430126	0.209924	1.24539	1.01444	0.204005	0.715698
Cre01.g045200.t1.1	8.16992	7.95935	1.87268	4.11285	14.0073	13.4709	6.88354	6.45459
Cre01.g045250.t1.1	16.1356	15.4022	10.0123	9.77301	19.0379	18.468	14.0336	11.7932
Cre01.g045350.t1.1	16.5356	15.2018	11.9579	11.0469	18.1359	18.1302	11.3431	12.791
Cre01.g045400.t1.2	0.286567	0	0.262744	0.256466	0.253584	0	0	0.499642
Cre01.g045450.t1.1	17.0247	17.8145	13.7305	14.39	17.1576	14.3167	11.1051	12.9177
Cre01.g045500.t1.1	1.91411	2.02018	2.01092	1.89149	2.22311	2.37998	2.25435	2.29442
Cre01.g045550.t1.1	309.924	308.828	204.331	206.393	265.669	266.394	169.609	170.406
Cre01.g045600.t1.2	15.2533	16.1909	15.8639	12.7342	12.8933	10.929	16.2362	12.5035
Cre01.g045601.t1.1	0.427505	0.647868	0.435517	0.467621	1.1349	0.986069	0.867562	0.455506
Cre01.g045640.t1.1	9.24129	7.94391	5.68192	4.86504	10.3904	11.0026	11.0632	9.76234
Cre01.g045650.t1.1	16.1362	17.5633	20.9167	22.4087	24.0279	26.278	31.8427	31.2385
Cre01.g045700.t1.2	2.26535	1.65522	1.64431	2.19634	2.67281	2.04108	2.70907	2.46858
Cre01.g045750.t1.2	9.60494	8.02061	7.5484	9.82403	0	1.18684	2.38676	1.19619
Cre01.g045800.t1.2	5.2041	4.82854	4.88508	3.88121	3.39901	3.96548	2.69413	3.24056
Cre01.g045850.t1.2	0.252076	0	0.23112	0.451194	0.669185	1.09018	0.657709	0.659257
Cre01.g045885.t1.1	3.0873	8.3548	5.6613	4.60501	3.64261	2.37369	2.38676	2.09333
Cre01.g045900.t1.2	17.7007	16.8655	15.5159	17.4081	7.74563	7.23462	5.0752	7.80028
Cre01.g045950.t1.1	2.75305	2.68208	1.63329	1.15946	5.01565	4.48241	0.84508	1.41178
Cre01.g046000.t1.1	0.249144	0.0809076	0	0	0	0.143667	0	0.072399
Cre01.g046050.t1.2	0.249927	0.121743	0	0	0.11058	0.108089	0	0
Cre01.g046100.t1.1	3.35235	3.91914	2.32233	1.8668	3.62572	3.47959	1.74938	1.88338
Cre01.g046150.t1.2	12.5722	9.25414	12.0393	11.1265	9.51816	11.1161	9.8409	9.49872
Cre01.g046200.t1.2	6.36957	4.67148	3.14969	3.13848	8.16967	8.2332	6.72243	7.42454
Cre01.g046250.t1.1	0	0.298421	0.0936171	0	0.542119	0.264952	0.444018	0
Cre01.g046300.t1.1	0	0	0	1.32598	1.31108	5.12616	0	1.29163
Cre01.g046550.t1.1	0	0	0	0	0.338111	0.660986	0	0
Cre01.g046600.t1.2	0	0	0.206624	0	0	0.0974634	0.0980001	0.196461
Cre01.g046650.t1.1	0.137045	0.133512	0	0	0	0.0592693	0.0595957	0
Cre01.g046800.t1.1	80.0356	78.9207	71.1516	77.2892	83.7397	87.1134	126.1	121.095
Cre01.g046850.t1.1	37.0539	35.1307	39.1802	35.5758	28.5177	24.5596	32.1033	30.4461
Cre01.g046900.t1.1	0.558203	1.08763	0	0.499569	2.96373	1.44847	0.970967	1.45988
Cre01.g046950.t1.1	0	0	0	0	0	0	0	0.334933
Cre01.g047000.t1.1	2.20628	1.07471	1.68572	1.15181	2.27773	2.7035	1.75896	2.5645
Cre01.g047100.t1.2	0	0	0	0	0	1.46018	0	0
Cre01.g047218.t1.1	0	0	0	0	0.13425	0.26245	0.263896	0.132258
Cre01.g047229.t1.1	18.062	18.3236	30.7943	28.9897	11.8883	13.6862	21.9407	19.7801
Cre01.g047250.t1.2	2.14631	2.55565	2.18654	2.34772	3.58751	4.43492	3.00746	2.28689
Cre01.g047277.t1.2	0.374386	1.09421	0.343263	0.33506	3.97554	3.56213	1.62807	1.95828
Cre01.g047300.t1.1	0.203316	0.396152	1.3049	0.363919	0.899574	1.05517	1.23781	0
Cre01.g047350.t1.2	0.905945	0.611027	0.0638948	0.436576	0.986673	0.783609	0.484876	0.789778
Cre01.g047400.t1.2	0	0.0645643	0.0607631	0.177933	0.0586446	0.17197	0.0576389	0
Cre01.g047450.t1.2	9.04112	7.68365	3.70382	4.64827	4.93647	5.98996	3.68069	3.68935
Cre01.g047500.t1.1	0.156793	0.076376	0.143759	0.140323	0.901852	0.474671	0.272734	0.205032
Cre01.g047550.t1.1	73.1825	72.139	75.5058	78.3466	72.2609	78.7136	65.9058	66.9657
Cre01.g047600.t1.1	10.7335	8.39977	11.4545	8.18876	26.7815	25.2649	19.7417	15.493
Cre01.g047650.t1.1	7.1286	6.30182	11.1354	11.5782	7.47627	8.10711	7.11843	4.94859
Cre01.g047700.t1.1	7.84865	9.11054	7.50239	9.71433	21.7224	21.0886	20.188	15.8681
Cre01.g047750.t1.1	2786.56	2760.64	2876.13	2901.29	3914.69	3999.24	4449.42	4414.89
Cre01.g047800.t1.2	15.105	15.2412	8.90311	7.72477	20.3679	18.8202	10.4785	11.1302
Cre01.g047850.t1.1	1.11417	0.434182	0.20431	0.598283	1.57749	0.385487	0.581415	0.971305
Cre01.g047900.t1.1	16.525	15.4169	11.0424	12.7838	11.277	9.44822	6.4553	5.49381
Cre01.g047950.t1.1	16.783	9.7575	7.94208	9.44811	12.2164	12.6435	9.41716	9.20333
Cre01.g048000.t1.2	0.0973077	0.0473998	0	0	0.0861077	0.0420838	0.126947	0.0424151
Cre01.g048050.t1.1	1.97548	3.52837	4.37721	2.50463	3.05919	3.41744	2.5772	4.73597
Cre01.g048100.t1.2	1.75633	3.1013	2.46581	1.71921	1.55418	1.75653	0.572823	0.956951
Cre01.g048102.t1.1	0.786528	0.875721	0.824163	1.35754	0.944571	0.534535	0.537479	0.636696
Cre01.g048150.t1.1	541.789	553.491	665.644	664.759	416.634	401.733	698.681	725.145
Cre01.g048200.t1.2	0	0	0	0	0.0527237	0.154607	0	0.0519414
Cre01.g048250.t1.1	2.77388	1.57639	1.0597	0.620626	0.409101	2.3993	0.603128	1.20909
Cre01.g048300.t1.2	1.22347	1.74817	1.27133	0.583976	1.94877	1.05826	1.13502	1.49322
Cre01.g048350.t1.1	0	0	0	0	0.115938	0.679952	0.455797	0.228435
Cre01.g048400.t1.2	0.897622	0.437243	0.720126	0.30125	0.546086	0.824935	0.536721	0.782522
Cre01.g048450.t1.2	2.68556	3.59747	6.77134	8.78768	4.60439	3.70214	8.75889	7.75522
Cre01.g048500.t1.1	1.97548	1.57465	2.14058	1.60725	2.70162	1.86406	1.87432	2.03529
Cre01.g048550.t1.2	0.978776	1.03301	2.84179	2.04392	1.80442	1.90486	2.34098	2.27538
Cre01.g048600.t1.2	2.10005	1.98393	1.57539	0.911253	3.77299	3.63293	2.37995	1.88624
Cre01.g048650.t1.2	2.00456	2.30797	3.34167	3.91419	6.85348	5.75331	9.50957	11.2
Cre01.g048700.t1.1	0	0	0	0	0	0	0.119045	0
Cre01.g048750.t1.1	1.52448	1.06084	0.199677	0.584718	3.85431	4.33259	2.84116	2.65799
Cre01.g048800.t1.2	15.5447	14.53	9.24479	9.77587	10.5954	5.81429	6.2117	6.22631
Cre01.g048850.t1.1	4.96765	2.62722	4.16428	4.69989	6.09143	6.07695	4.3205	3.27893
Cre01.g048900.t1.2	1.5413	1.14119	1.01748	0.882814	1.30934	1.38649	0.482582	0.268732
Cre01.g048950.t1.1	7.68477	8.86885	3.79395	4.86719	21.0285	20.8615	14.6012	12.6773
Cre01.g049000.t1.1	5.6359	6.33535	5.16737	6.01387	6.1381	5.81231	3.20495	3.96837
Cre01.g049050.t1.1	9.93433	11.3534	10.3346	13.1652	19.2723	17.3509	13.1264	16.3217
Cre01.g049100.t1.2	0.268088	0.174119	0.614503	0.599819	1.06754	1.12078	0.77721	0.389519
Cre01.g049132.t1.1	5.51219	4.59058	5.95062	6.20626	10.6996	10.9968	12.9904	13.486
Cre01.g049150.t1.1	5.64615	0	3.45118	0.842178	6.66171	3.25581	2.4553	0.820359
Cre01.g049200.t1.2	6.40409	7.91618	2.52546	2.89651	3.77799	3.81199	1.61704	1.7409
Cre01.g049250.t1.1	0	0	0.982259	0.958788	0	0	0	0
Cre01.g049300.t1.2	1.52209	1.26043	0.767558	0.136221	1.07752	1.25073	0.595712	0.796152
Cre01.g049350.t1.2	13.776	13.53	14.0684	14.6343	10.8028	11.6251	8.86422	8.88508
Cre01.g049400.t1.1	7.86211	7.11236	6.82235	7.6645	12.0508	12.2651	5.86104	6.85397
Cre01.g049450.t1.1	15.5556	16.1019	14.931	13.7041	16.5613	15.3472	11.6266	11.2302
Cre01.g049500.t1.1	407.29	406.303	400.564	394.269	313.706	318.776	268.26	259.316
Cre01.g049550.t1.1	14.6174	17.5371	16.6287	20.592	13.6536	11.1216	19.3052	17.9347
Cre01.g049600.t1.1	10.4573	9.26157	12.7009	13.7344	11.4168	13.7439	14.6464	15.628
Cre01.g049650.t1.2	1.11311	0.877866	0.874781	0.948753	2.53284	2.38408	4.74832	4.8519
Cre01.g049750.t1.1	2.16312	1.62105	2.89866	3.57397	2.35587	3.88596	3.76264	3.91655
Cre01.g049751.t1.2	20.6509	18.0592	8.34892	10.9144	8.63339	10.5486	10.7481	9.07232
Cre01.g049850.t1.2	37.1438	38.1553	23.2577	22.2654	33.0535	32.0677	26.0015	25.2121
Cre01.g049900.t1.2	25.118	23.1035	23.1586	24.6145	24.8346	23.4254	20.5033	22.9981
Cre01.g049950.t1.1	0.250658	0.610493	0.861825	0.448656	1.4972	0.813036	1.63503	1.52961
Cre01.g050000.t1.1	27.5409	25.304	30.589	23.0448	21.7951	23.4345	22.7846	19.715
Cre01.g050050.t1.1	3.32224	1.87383	0.801593	2.03434	2.16621	3.93231	1.67283	1.21947
Cre01.g050100.t1.1	152.755	158.37	115.753	114.907	163.102	157.969	178.161	168.963
Cre01.g050150.t1.2	5.0979	4.9665	5.0636	5.32281	7.51855	6.12429	3.69481	5.55525
Cre01.g050200.t1.1	0	0	0.585751	1.14351	0.565329	0	0	0.556941
Cre01.g050250.t1.2	12.547	6.1118	9.20315	8.98323	19.9851	19.5348	48.0148	37.1896
Cre01.g050268.t1.1	1.93433	1.88447	0	0	5.13507	13.385	10.094	30.3533
Cre01.g050300.t1.2	1.26324	1.23067	0.868665	0.565272	5.30973	7.10223	4.66934	4.1297
Cre01.g050308.t1.1	3.08123	3.00181	3.3901	3.30909	22.6306	26.6515	25.7263	21.489
Cre01.g050350.t1.2	1.53286	1.06668	1.30505	1.17587	2.13154	1.7994	1.61885	2.00446
Cre01.g050400.t1.1	88.0083	92.1558	48.4426	46.3474	41.1909	36.7673	37.3603	34.8386
Cre01.g050450.t1.2	0.168882	0.274216	0.3613	0.302285	1.29518	1.07123	0.391684	0.147227
Cre01.g050500.t1.2	0.544942	0.227527	0.428263	0.0696715	1.30888	1.01005	0.880193	0.882264
Cre01.g050550.t1.1	239.473	263.817	232.226	230.294	194.325	209.757	148.81	146.811
Cre01.g050600.t1.2	7.24138	6.32493	6.75386	9.38589	8.94897	8.74733	6.84094	8.0543
Cre01.g050601.t1.1	1.28766	1.19745	1.12695	1.67622	1.19124	1.26565	0.610859	0.510246
Cre01.g050650.t1.1	1.29426	1.08077	0.593333	0.372314	1.63613	1.71921	0.964844	0.765632
Cre01.g050700.t1.2	0.129495	0	0	0	0.45836	0.112008	0.337875	0.56445
Cre01.g050750.t1.2	0	0.0820823	0.0772497	0.150808	0.0745563	0	0	0.1469
Cre01.g050800.t1.2	0	0.152452	0.215214	0.350119	0	0.135354	0.136099	0.136419
Cre01.g050850.t1.1	33.3941	30.7413	24.0662	24.5042	29.4252	29.7414	23.6903	23.6843
Cre01.g050900.t1.2	19.2415	14.1038	11.9293	13.7763	3.72968	4.59668	3.0282	3.99385
Cre01.g050950.t1.1	349.646	358.738	201.853	196.767	316.586	316.728	149.113	150.914
Cre01.g051000.t1.1	3.07274	5.23869	2.95816	2.61247	4.75836	4.51826	3.47417	3.88415
Cre01.g051050.t1.1	1.2427	1.1242	1.30217	1.03273	1.8066	1.91945	2.00722	3.01792
Cre01.g051100.t1.1	15.8846	13.4783	13.6244	13.0237	15.5979	14.4487	15.5087	16.0812
Cre01.g051150.t1.2	0.619812	0.442813	0.5304	0.517725	1.31633	0.893523	0.539066	0.756468
Cre01.g051200.t1.2	0	0.320383	0	0.441472	0.145504	0.142225	0	0.143345
Cre01.g051250.t1.1	5.47402	6.5636	5.21199	4.52217	22.3568	18.9393	21.7903	21.2909
Cre01.g051300.t1.2	1.37817	1.71561	1.3338	1.43897	1.76156	1.72187	0.865677	0.867713
Cre01.g051350.t1.2	11.0059	12.6614	10.413	9.53548	7.8742	5.67131	5.80438	5.71596
Cre01.g051400.t1.1	87.0165	87.2713	140.622	138.881	120.506	120.4	218.516	196.943
Cre01.g051450.t1.2	6.5676	5.83376	4.42766	3.45749	17.7769	15.2043	9.07201	8.41977
Cre01.g051461.t1.1	0	0	0.356189	0	0	0	0	0
Cre01.g051500.t1.1	564.737	541.624	511.814	528.24	1042.35	1025.97	771.622	777.143
Cre01.g051550.t1.2	0.727774	0.61448	0.622788	0.47764	1.63149	2.30816	0.928347	0.67675
Cre01.g051600.t1.2	3.19902	3.56179	3.14258	4.29449	2.42641	3.75526	4.17341	6.17524
Cre01.g051650.t1.2	0.117728	0.688159	2.15881	1.68578	0.937595	1.62928	3.2765	2.87368
Cre01.g051700.t1.2	2.80144	2.40433	2.32393	2.44748	3.06924	2.48084	2.20444	2.26777
Cre01.g051750.t1.2	2.71865	2.18796	1.62564	0.952074	4.13159	4.70306	2.10747	2.7307
Cre01.g051800.t1.1	11.881	10.8733	4.40133	3.86654	7.75238	8.40814	5.94942	4.49872
Cre01.g051850.t1.2	0	0	0.0639908	0	0.0617598	0.0603682	0.121401	0.0608435
Cre01.g051885.t1.1	0	0	0	0.265197	0	0.256308	0	0
Cre01.g051900.t1.1	481.591	489.337	464.974	485.259	255.782	244.425	227.212	238.88
Cre01.g051950.t1.1	28.1326	26.3031	51.5877	51.0005	30.0923	29.236	65.6055	59.651
Cre01.g052000.t1.1	18.8687	15.1034	20.6667	18.6211	20.8486	19.0556	25.0151	24.2737
Cre01.g052050.t1.1	62.6558	54.6155	35.4761	35.2186	20.8159	17.1142	17.0172	15.524
Cre01.g052100.t1.1	85.0849	94.1238	56.236	61.9085	114.264	118.869	91.0467	85.0294
Cre01.g052150.t1.1	0.521861	0.444859	0.956955	0.875707	0.808142	1.46702	1.75877	1.5923
Cre01.g052200.t1.1	0.371887	0.362302	0	0.166412	1.48087	1.44751	0.32344	0.648401
Cre01.g052250.t1.1	69.2939	69.9506	49.9489	47.9394	78.4632	68.4145	44.407	45.9025
Cre01.g052300.t1.1	4.71694	5.78381	4.47394	4.65817	5.10958	5.13514	2.9	3.6867
Cre01.g052350.t1.1	49.4085	47.5044	48.4662	49.4321	30.5479	32.0991	34.5276	26.709
Cre01.g052400.t1.1	16.8762	16.9395	15.1607	18.1548	15.3864	16.0718	15.5673	16.0497
Cre01.g052450.t1.2	2.12629	2.23944	2.73987	2.52011	2.7969	2.33623	1.5494	2.10413
Cre01.g052500.t1.2	3.32201	3.86959	4.10527	4.45959	2.74793	2.56109	2.88924	4.09222
Cre01.g052550.t1.2	1.86691	1.6629	1.95624	3.29388	3.30407	3.59872	5.70615	5.02207
Cre01.g052600.t1.2	1.92461	1.70455	3.3688	2.03562	3.71583	3.48077	1.36954	2.59299
Cre01.g052650.t1.2	0.593319	0.809236	0.326397	0.283198	0.770041	0.855331	0.619229	0.551721
Cre01.g052750.t1.2	0.134033	0.217631	0.122891	0.139947	0.612798	0.483057	0.155429	0.136321
Cre01.g052800.t1.2	0	0	0.0559937	0.109311	0.0540415	0.211295	0	0
Cre01.g052850.t1.2	0	0.0392258	0.110749	0.0360342	0	0.069653	0.0350183	0
Cre01.g052950.t1.2	0.0559324	0	0.0512826	0.150172	0.445452	0.338656	0.243229	0.633884
Cre01.g053000.t1.1	53.0234	54.5388	99.7346	100.61	38.8654	35.234	74.8145	76.3792
Cre01.g053050.t1.1	1.01411	0.329325	0	0	0	0	0	0
Cre01.g053100.t1.2	0.861919	0.699752	0.263422	0.257127	0.889831	0.869782	0.124939	0.500931
Cre01.g053150.t1.1	0	0.218138	0.410591	0.20039	0.990688	0.58102	0.19474	0.390396
Cre01.g053200.t1.2	0.823484	1.06968	1.0067	1.10548	1.27523	0.94971	0.358102	0.418769
Cre01.g053250.t1.2	4.30515	5.33806	3.01427	3.36256	3.32477	3.31756	1.73599	1.70596
Cre01.g053288.t1.1	39.8359	37.7602	26.7938	27.6677	15.3797	16.0974	19.129	25.0737
Cre01.g053300.t1.2	4.49923	4.48288	5.25026	3.38603	2.5336	2.47652	2.93482	3.74402
Cre01.g053350.t1.2	5.19759	4.94854	4.00735	4.54591	5.74918	4.39354	3.18488	4.22217
Cre01.g053360.t1.1	0.288546	0.374812	0.0881863	0.258237	0.51067	0.582357	0.250956	0.503093
Cre01.g053400.t1.2	11.1715	10.158	6.82854	1.99961	10.5447	3.86518	2.59098	4.54488
Cre01.g053450.t1.2	4.57351	3.83828	4.11752	4.04379	5.41239	5.76706	6.73334	6.79721
Cre01.g053500.t1.1	8.78495	10.7719	7.49914	8.9466	12.5989	14.4112	14.0954	13.8645
Cre01.g053550.t1.2	0	0.0631961	0	0.116108	0	0.112217	0	0
Cre01.g053600.t1.1	2.94509	2.86918	1.56331	2.21956	3.0176	2.14517	2.15699	1.75667
Cre01.g053650.t1.1	0.0973928	0.0948825	0	0	0	0	0	0
Cre01.g053700.t1.2	0.041555	0	0	0	0.0367721	0	0.0361415	0
Cre01.g053750.t1.1	1.93657	0.157221	1.33168	1.29986	2.99893	2.65218	2.10536	1.1255
Cre01.g053850.t1.1	2.38788	2.13771	1.30179	1.96378	1.65617	1.39556	1.34712	1.12524
Cre01.g053900.t1.2	1.7795	1.52967	1.05572	1.9673	1.57468	1.62974	1.09248	1.00379
Cre01.g053950.t1.2	46.6455	47.4141	51.0881	49.1948	49.4092	52.9455	71.7871	69.3861
Cre01.g054000.t1.1	1.23249	1.10067	0.282508	0.551515	1.36329	1.42141	0.982603	0.895377
Cre01.g054050.t1.1	32.5699	32.8341	34.5364	36.4992	49.8731	50.5866	44.0914	45.9234
Cre01.g054100.t1.2	11.1377	8.36191	8.5254	9.14471	7.77607	6.36351	9.33122	7.92793
Cre01.g054150.t1.1	24.4529	20.1957	25.756	27.1093	25.3072	25.9812	32.2322	31.2016
Cre01.g054200.t1.1	21.038	24.8682	66.3544	70.5428	24.0774	24.2628	58.5514	64.558
Cre01.g054250.t1.1	0.467747	0.455691	0.214431	0.104653	0	0	0.203406	0.101942
Cre01.g054300.t1.2	1.65743	2.44514	1.95383	1.90714	1.71809	1.5565	2.10049	1.77517
Cre01.g054350.t1.2	53.9936	43.9381	49.2138	52.0172	18.5495	18.4062	15.469	15.7823
Cre01.g054400.t1.1	17.948	16.8041	17.9519	19.1918	4.74403	7.66136	4.45995	5.89285
Cre01.g054500.t1.1	187.863	187.319	150.635	145.373	234.513	237.364	216.001	213.776
Cre01.g054550.t1.1	13.3027	13.4888	11.699	9.96167	5.04498	7.51437	3.77788	3.07675
Cre01.g054600.t1.2	11.4209	10.5084	5.23573	4.8267	5.61465	6.03696	4.13878	4.70165
Cre01.g054650.t1.2	0.611646	1.19176	0.336479	0.218959	0.649495	0.846481	0.851142	0.426572
Cre01.g054700.t1.1	9.33665	8.9065	8.38213	8.52999	5.16376	5.88864	3.89099	1.86529
Cre01.g054750.t1.1	0.198251	0	0.18177	0.354854	0.701732	0.51444	0.172424	0
Cre01.g054800.t1.1	61.6267	58.9849	69.9642	65.6441	26.8891	24.7082	43.5517	41.7691
Cre01.g054850.t1.1	71.6101	66.9668	68.948	68.4248	112.601	108.356	112.855	108.896
Cre01.g054900.t1.1	1.88401	1.12951	1.6388	1.08084	1.36793	1.75495	2.39483	2.06356
Cre01.g054950.t1.1	5.725	4.93389	4.74435	4.03979	3.31242	3.99962	4.59617	2.87936
Cre01.g055000.t1.2	12.3165	10.0505	16.8907	18.654	16.4881	15.7524	41.1085	44.6925
Cre01.g055050.t1.1	2.2403	2.18255	0.912913	1.33665	2.42298	2.36839	1.29896	1.51902
Cre01.g055100.t1.1	0	0	0.124216	0.242495	0.23977	0.117184	0.117829	0.118106
Cre01.g055150.t1.1	1.76853	0.861473	1.62151	1.38491	1.56497	1.14728	2.69174	1.73447
Cre01.g055200.t1.1	3.63065	4.38597	5.19297	4.54899	5.78298	4.52214	3.7892	3.1651
Cre01.g055250.t1.1	1.27189	0.929329	0.874614	0.853715	0.281374	1.92524	0.553097	1.1088
Cre01.g055300.t1.2	0.201551	0.589068	0.369591	0.18038	0	0	0.525882	0.175706
Cre01.g055314.t1.1	1.02105	0.994736	0.561702	0.54828	0.542119	0.706538	1.24325	0.890126
Cre01.g055350.t1.1	0.0767972	0.112227	0.0352064	0.137461	0.237853	0.464987	0.100189	0.200849
Cre01.g055400.t1.1	1.30908	0.566818	1.20025	0.650874	2.05939	1.50974	0.506019	0.887616
Cre01.g055450.t1.2	8.54428	7.49164	7.05057	6.6272	3.27636	2.95619	0.743118	2.2346
Cre01.g055500.t1.2	152.776	156.028	115.226	116.377	91.0452	91.2819	57.1938	59.1085
Cre01.g055550.t1.1	11.5927	12.6863	11.357	11.7963	13.4905	13.736	7.32017	6.36831
Cre01.g055600.t1.2	0.108467	0.0704475	0.0662999	0.0647157	0.159971	0.0938199	0.0943366	0.063039
Cre01.g055650.t1.1	0.330812	0.161142	0.30331	0.370078	0.585471	0.214605	0.287715	0.072098
Cre01.g055700.t1.2	0	1.87147	0	0	1.69988	0	0	0
Cre01.g055708.t1.1	0	0	0.122429	0.119504	0.827125	0.577492	0.348403	0.46563
Cre01.g055716.t1.1	0	0	0	0	0.127579	0.374114	0.250783	0
Cre01.g055750.t1.2	7.88685	7.07376	16.758	14.789	9.41621	10.6117	13.0655	17.7891
Cre01.g055850.t1.1	6.4033	7.43792	7.00001	7.05315	11.7684	13.6335	9.42465	9.23212
Cre01.g055900.t1.2	0.25503	0.248456	0.514423	0.273889	0.767298	0.926482	0.0887223	0.489121
Cre01.g055950.t1.1	15.6047	12.7321	11.2671	9.0776	21.5759	20.4149	11.536	13.4337
Cre01.g056000.t1.1	3.39983	6.03294	4.00782	2.3907	3.86809	5.98648	2.32329	2.85803
Cre01.g056050.t1.1	38.0199	45.7841	33.0099	32.4016	29.8065	33.2347	29.9093	27.6938
Cre01.g056100.t1.1	7.77627	5.83712	5.25969	5.2481	9.36298	7.16724	4.4349	3.77853
Cre01.g056150.t1.1	5.80299	4.21235	5.0076	4.88794	7.75295	4.92095	3.46363	3.67017
Cre01.g056200.t1.2	24.9003	27.724	14.4639	13.2878	25.3189	21.2703	10.0884	13.4829
Cre01.g056250.t1.1	54.0594	51.4758	34.4437	26.7872	109.188	104.878	33.204	37.5422
Cre01.g056300.t1.1	0.184588	0.0899152	0	0.0825993	0.326684	0.0798309	0.0802705	0
Cre01.g056350.t1.2	1.44323	1.07026	0.908501	0.790401	1.39148	0.987492	0.599505	0.563358
Cre01.g056400.t1.2	0.143801	0.140095	0.263694	0.257393	0.12725	0.124383	0.250136	0.125362
Cre01.g056450.t1.2	16.4121	17.5655	9.96117	10.9644	15.5458	12.9962	8.0417	9.0682
Cre01.g056500.t1.2	1.48746	1.95317	3.85423	3.47274	3.03311	2.85289	4.44352	4.51035
Cre01.g056550.t1.2	4.8413	5.70369	14.7617	13.8044	8.26924	9.44631	17.332	15.7042
Cre01.g056570.t1.1	1.42393	0.853681	0.602566	0.588167	0.969262	0.568453	0.190528	0.572929
Cre01.g056600.t1.2	24.4546	20.6283	20.9177	22.6865	28.7652	27.0852	72.1063	69.4161
Cre01.g056650.t1.1	33.0094	34.3481	33.6138	33.6905	19.7634	22.1125	29.9308	31.7156
Cre01.g056700.t1.1	6.61028	5.1075	3.97084	4.48794	10.0852	11.8296	11.3	10.5317
Cre01.g056750.t1.1	7.93776	9.1392	10.0898	11.4632	20.2742	22.4701	25.2612	28.9378
Cre01.g056800.t1.2	8.48819	11.45	9.81799	7.36284	10.4001	9.37513	10.3354	10.3597
Cre01.g056850.t1.2	1.39621	0.68011	0.320034	0	0.926629	1.20767	0	0.304293
Cre01.g056900.t1.2	0.428968	0.510781	0.437008	0.554535	0.59048	0.659629	0.207269	0.415514
Cre01.g056950.t1.1	0	0	0	0	0	0	0.790826	0.528458
Cre01.g057000.t1.2	3.01244	2.72517	4.43895	3.94773	3.61775	3.81542	4.11714	4.22062
Cre01.g057050.t1.1	2.97215	2.82129	6.35848	7.09319	1.82081	2.2412	1.52446	2.05954
Cre01.g057100.t1.2	0.800412	1.28107	1.41532	1.48384	3.0861	3.26382	2.884	4.43586
Cre01.g057137.t1.1	1.55487	1.51479	1.01829	0.795167	0.78623	1.92129	1.73868	1.93641
Cre01.g057150.t1.2	0.119804	0	0.439376	0.964973	1.69623	1.96889	2.8133	2.40215
Cre01.g057162.t1.1	12.4704	9.49829	16.7348	17.0451	36.2151	37.4583	43.5805	46.6479
Cre01.g057200.t1.1	18.8778	15.7639	13.4229	9.30939	18.7505	14.3291	20.7744	20.4874
Cre01.g057250.t1.2	0.998363	1.64599	1.33784	0.893494	1.15528	1.32853	0.53434	0.669496
Cre01.g057256.t1.1	0.195881	0.0477081	0	0.131479	0.346671	0.254145	0.255545	0.298837
Cre01.g057300.t1.2	9.07134	9.35738	9.29571	9.78992	5.43019	4.38473	2.55251	2.79111
Cre01.g057307.t1.1	0.336812	0.262504	0.0926436	0.0301433	0.26824	0.320462	0.117174	0.117449
Cre01.g057350.t1.2	7.92459	7.6051	4.98846	4.97511	6.27983	5.62681	3.08607	2.88711
Cre01.g057400.t1.1	374.44	359.659	525.514	517.421	539.32	562.648	606.967	609.603
Cre01.g057450.t1.2	3.28205	2.41119	3.45318	3.0336	5.14201	4.60731	9.35895	9.7093
Cre01.g057500.t1.2	1.11801	1.24479	0.951845	0.428816	1.62532	1.79592	1.45854	2.29738
Cre01.g057550.t1.1	13.9125	13.4584	9.34235	9.38215	12.3112	13.8134	12.6965	13.6659
Cre01.g057600.t1.1	18.5277	16.6734	12.0928	12.6469	8.19758	6.51895	6.14517	5.47523
Cre01.g057650.t1.1	0.316527	0.17621	0.331672	0.202342	0.240081	0.19556	0.196637	0.0788397
Cre01.g057700.t1.1	7.07412	9.30391	4.21592	4.11518	7.19888	7.49559	4.15297	3.70021
Cre01.g057750.t1.1	5.09353	7.2307	6.00441	7.81457	10.4311	10.5737	7.97396	7.61211
Cre01.g057800.t1.1	271.916	262.452	186.833	195.986	477.603	481.859	362.816	369.366
Cre01.g057850.t1.1	14.5187	16.7638	26.8699	29.5966	9.04089	9.53486	14.498	10.0787
Cre01.g057900.t1.1	12.2289	11.9776	9.40869	10.1521	14.0997	14.8029	14.3711	13.2331
Cre01.g057950.t1.1	17.8725	19.307	16.9441	18.0625	14.094	14.0919	19.5624	22.1522
Cre01.g058000.t1.2	0.28796	0.252484	0.105608	0.0515424	0.688002	0.622686	0.60107	0.251035
Cre01.g058050.t1.1	7.00164	8.15575	7.67558	7.21972	8.75487	9.87416	6.88379	5.83845
Cre01.g058100.t1.2	15.0031	14.0923	12.605	12.0898	32.1063	30.8659	21.8343	21.573
Cre01.g058150.t1.1	39.5581	38.8043	55.1964	54.203	35.6487	35.0815	29.7383	33.7721
Cre01.g058200.t1.2	0	0.0520952	0.0980562	0.0957131	0.7571	0.878799	0.51158	0.372933
Cre01.g058250.t1.2	2.93132	2.65652	3.18765	2.44038	7.35951	5.24785	7.2333	7.66632
Cre01.g058266.t1.1	5.78371	6.76156	5.72713	8.07484	11.0549	9.40506	8.65201	5.64712
Cre01.g058300.t1.1	7.88922	7.33652	8.30194	6.90006	12.1377	9.69301	7.25132	6.8776
Cre01.g058350.t1.1	0.284131	0.461346	0.781532	0.678095	2.43047	2.21187	1.81219	1.56875
Cre01.g058400.t1.1	3.3627	3.02252	2.38577	2.34667	6.83692	7.32346	6.30187	6.70058
Cre01.g058450.t1.2	1.33062	0.72018	0.67778	1.05853	1.56996	1.15094	0.642931	0.386666
Cre01.g058500.t1.2	5.8505	7.14878	6.18239	5.59094	12.3724	11.236	10.0042	11.0651
Cre01.g058550.t1.1	0.0970534	0	0.222463	0.0868588	0.0858827	0.167895	0.25323	0.211521
Cre01.g058600.t1.2	34.4044	33.8399	26.388	23.537	30.5908	28.3278	28.9154	25.2343
Cre01.g058650.t1.2	26.5399	34.0272	100.663	89.1823	13.0719	17.217	62.6056	64.1716
Cre01.g058700.t1.1	117.714	124.236	105.418	111.474	86.8041	72.0224	69.2444	65.8276
Cre01.g058750.t1.1	3.50072	4.24006	3.46994	2.87897	4.35364	5.2376	6.2539	6.43358
Cre01.g058850.t1.1	2.73501	1.83185	0.548546	0.458947	2.49584	2.1439	0.297338	1.04313
Cre01.g058900.t1.1	0.9616	0.936814	1.46943	2.58177	3.12004	3.88149	1.39388	2.79432
Cre01.g058911.t1.1	0.760009	0.37021	0.348414	0.340088	0.672533	0.32869	0	0
Cre01.g058950.t1.2	3.83393	5.52147	6.72474	6.86242	9.44041	8.36261	8.40866	10.8988
Cre01.g059000.t1.1	9.37593	8.94397	3.40278	4.54516	6.22258	5.57551	3.39771	2.72456
Cre01.g059050.t1.1	4.17763	3.56121	3.63882	3.08451	5.36034	5.78159	7.81179	9.10485
Cre01.g059100.t1.1	3.25504	3.42055	4.62756	4.54971	4.62803	5.06154	6.52082	6.28109
Cre01.g059150.t1.1	32.1183	32.7291	32.3254	29.075	14.3741	13.8906	9.47192	9.81604
Cre01.g059200.t1.1	0.38179	0.584492	0.250037	0.0976247	0.772221	0.89635	0.379489	0.332834
Cre01.g059250.t1.1	2.33323	1.5154	0.916828	0.696048	3.44113	4.22852	0.676424	0.774874
Cre01.g059300.t1.2	0	0	0	0.155318	0.153572	0.150112	0.150939	0.22694
Cre01.g059350.t1.1	40.4517	36.9266	35.7747	40.3359	44.6742	45.4584	33.3812	32.9044
Cre01.g059400.t1.1	10.5111	8.27927	11.9953	14.4107	12.3687	11.7998	20.5203	20.2761
Cre01.g059450.t1.1	16.9332	16.1941	14.5284	12.93	23.6448	22.5745	16.2135	15.439
Cre01.g059500.t1.2	3.42389	2.55078	4.24722	2.52349	3.38625	6.6199	5.25502	5.26738
Cre01.g059550.t1.2	35.8215	32.0903	23.4058	23.952	24.958	21.9027	21.1281	21.1777
Cre01.g059600.t1.1	26.8117	29.0229	29.5334	26.4948	56.8427	55.2399	66.8796	67.6862
Cre01.g059650.t1.2	11.6833	11.2589	8.73979	5.88862	14.0709	15.2496	6.82309	6.36114
Cre01.g059700.t1.2	5.49566	4.08596	5.96699	4.27123	3.45537	3.50261	4.77972	3.78234
Cre01.g059750.t1.1	2.86463	3.77578	5.87097	3.77019	3.87693	5.53861	4.39667	2.49731
Cre01.g059800.t1.2	0	0.111397	0.104839	0.102334	0.101184	0	0.298345	0.0996824
Cre01.g059850.t1.1	19.54	20.4417	19.2382	19.0132	30.0561	30.7401	30.3391	34.1832
Cre01.g059900.t1.1	23.7486	26.2737	25.957	23.5356	38.1123	38.182	44.3436	46.0855
Cre01.g059950.t1.2	1.81107	1.58796	0.99631	0.540279	2.13683	2.92416	0.840074	0.631538
Cre01.g060000.t1.1	3.82758	3.22043	3.98794	5.29399	23.5552	24.5294	44.4868	41.103
Cre01.g060050.t1.2	0.15089	0.147001	2.0752	1.95809	0.93466	0.587315	0.459316	0.657709
Cre01.g060100.t1.2	0.762019	0.890854	0.326046	0.45465	0.98899	1.36218	0.0883663	0.31001
Cre01.g060150.t1.1	1.35168	1.88121	1.50488	0.864072	1.28154	2.83938	0.419855	1.01002
Cre01.g060200.t1.1	4.13765	4.20254	3.3901	4.49091	4.12883	3.35047	2.90953	2.68613
Cre01.g060250.t1.1	52.4661	55.94	48.9303	46.3504	55.5932	47.9132	62.6694	70.08
Cre01.g060300.t1.1	3.1297	3.04903	2.29562	3.08105	4.01574	3.11314	3.26638	4.229
Cre01.g060350.t1.2	0.335756	0.261682	0.49255	0.120195	0.297111	0.116167	0.116806	0.234162
Cre01.g060400.t1.2	8.02149	8.26777	13.9632	11.3406	9.56717	7.74273	15.8741	15.7087
Cre01.g060450.t1.2	16.2373	16.1064	9.87985	7.92638	17.2421	15.4491	13.4801	13.1257
Cre01.g060500.t1.2	0.844455	0.822689	0.658115	0.529026	1.12089	0.839985	0.550833	0.331277
Cre01.g060536.t1.1	0.915659	0.713646	0	0.163895	2.10669	1.90082	2.22984	1.91579
Cre01.g060550.t1.2	8.86429	10.9608	8.12738	7.32293	10.2576	10.9111	8.89558	7.72764
Cre01.g060600.t1.2	0	0.382742	0.360208	0.1758	0.347649	0.169908	0.170844	0.342491
Cre01.g060650.t1.2	0.350921	0.38461	1.32721	1.13847	0.776325	0.607067	0.343355	0.382404
Cre01.g060700.t1.2	2.39504	0.933324	0.878374	2.03629	2.11937	1.03581	3.02039	3.0275
Cre01.g060750.t1.2	0.242212	0.235969	0	0.108385	0.107167	0.209504	0.105329	0.211153
Cre01.g060800.t1.1	11.9868	10.2181	6.86895	5.22975	13.9219	13.8674	15.3772	19.4627
Cre01.g060850.t1.1	0.526547	0.683967	0	0.314159	0.465942	0.455443	0.457952	0.306019
Cre01.g060900.t1.1	438.638	447.618	312.192	319.702	190.3	177.302	161.356	163.818
Cre01.g060950.t1.1	46.6128	44.8593	23.7721	26.7544	54.5372	49.9996	37.2133	33.472
Cre01.g061000.t1.1	0.148319	0.144496	0	0	0.393743	0.384871	0.128997	0.387901
Cre01.g061050.t1.1	1.17758	1.23548	0.664423	0.324273	1.28251	1.72372	0.945391	0.789679
Cre01.g061100.t1.1	59.4883	61.4771	50.0228	54.8573	50.3146	40.226	31.4433	39.5399
Cre01.g061131.t1.1	2.96218	4.61732	1.1769	0.618573	2.88336	2.13514	0.772884	0.688625
Cre01.g061150.t1.1	0.0982516	0	0.0900837	0.0879311	0.0869429	0.339936	0.085452	0
Cre01.g061200.t1.1	4.80506	4.68121	7.57213	7.39119	10.7629	9.61121	29.776	27.4898
Cre01.g061300.t1.2	0	0	0.592546	0.578387	0	0	0	1.1268
Cre01.g061350.t1.1	0.259432	0.336993	0.0792882	0.154787	0.229572	0.523597	0	0.150777
Cre01.g061550.t1.1	0.981555	1.48751	0.59997	0.488028	0.965087	0.566005	0.663976	0.570461
Cre01.g061600.t1.2	15.6148	18.4392	8.82142	10.4457	12.5614	11.4598	13.3063	12.1001
Cre01.g061650.t1.1	12.2981	16.1822	13.9116	12.5786	14.9812	11.4663	9.44577	8.49335
Cre01.g061700.t1.1	12.582	11.0715	14.9915	13.803	21.2415	21.2142	31.5175	32.6531
Cre01.g061750.t1.1	33.959	35.7871	106.129	108.559	32.7397	32.3449	98.7183	100.678
Cre01.g061800.t1.1	28.3845	26.6845	62.176	58.5157	39.8752	40.1231	132.175	131.427
Cre01.g061850.t1.1	3.80164	3.13386	3.4856	2.87888	2.97591	3.54122	2.28904	1.14721
Cre01.g061900.t1.2	4.13771	4.91057	3.8972	3.29911	6.55735	6.37707	2.09377	2.06591
Cre01.g061950.t1.2	12.3825	14.7994	14.2792	14.6235	13.4425	13.8021	14.9884	13.4656
Cre01.g062000.t1.2	6.17192	6.70662	10.9259	11.5146	4.6213	5.667	13.3784	12.6235
Cre01.g062050.t1.2	3.26659	3.1824	2.91409	2.76544	2.65624	1.90911	1.38213	1.84717
Cre01.g062100.t1.2	0.314738	0	0	0	0	0	0	0
Cre01.g062150.t1.1	0	271.364	0	0	0	0	0	0
Cre01.g062200.t1.1	9.03572	5.92498	10.0371	10.4193	11.3785	11.573	14.2059	12.1186
Cre01.g062250.t1.1	0.678271	0.660789	1.24377	1.21405	1.2004	0.782239	1.37646	0.197099
Cre01.g062300.t1.1	1.97548	1.44342	2.26407	3.97795	7.42946	7.26206	3.43626	5.16652
Cre01.g062350.t1.1	0.296323	0	0	0.265197	0	0.256308	0	0
Cre01.g062400.t1.1	0.169947	0	0	0.152096	0	0	0	0
Cre01.g062450.t1.1	0	0	0	0.136744	0	0	0	0
Cre01.g062500.t1.1	1.08383	0	0	0	0	0	0	0
Cre01.g062550.t1.1	0.527544	1.54184	1.45107	1.88852	0.466824	1.36892	2.29409	0.919796
Cre01.g062600.t1.2	0.0818523	0.0797426	0.225143	0.293018	0.434587	0.141598	0.142378	0.21407
Cre01.g062650.t1.1	0.302436	0	0	0	0	0	0	0
Cre01.g062700.t1.1	1791.96	1587.48	851.291	785.247	221.835	176.682	141.316	141.649
Cre01.g062750.t1.2	0.821662	1.60097	2.26006	2.94141	0	0.710707	0	0.716302
Cre01.g062758.t1.1	7.26718	6.24146	9.55621	10.4404	3.13075	4.54896	4.49085	4.33469
Cre01.g062800.t1.2	9.42238	10.316	11.7656	12.0466	8.17905	7.29619	9.75581	9.07469
Cre01.g062850.t1.2	14.1035	19.2658	18.8343	17.4239	10.581	9.81221	9.86625	11.8941
Cre01.g062900.t1.1	93.8168	90.8838	112.671	94.6052	92.6066	95.5489	87.1111	89.3895
Cre01.g062950.t1.1	7.34459	5.0087	6.73401	7.72339	13.4859	10.9586	11.0189	11.525
Cre01.g063000.t1.2	7.37959	8.17616	10.4808	9.4534	11.0117	12.8913	11.4521	13.3712
Cre01.g063050.t1.1	4.7022	5.42487	5.33239	5.64794	3.83248	4.06722	2.69054	3.55987
Cre01.g063100.t1.1	17.6756	18.2592	16.3459	16.7735	17.2592	16.3431	11.5297	10.2285
Cre01.g063150.t1.2	9.96813	11.7267	8.27724	5.72295	8.65437	6.50721	4.25298	5.24675
Cre01.g063200.t1.1	490.844	499.352	473.935	477.188	426.421	391.921	351.815	358.322
Cre01.g063250.t1.1	6.9426	7.20961	6.22555	7.78375	9.38405	8.31474	6.76805	6.9835
Cre01.g063300.t1.1	0.431516	0	0.791285	0.772377	1.90924	2.05285	0.938251	1.31664
Cre01.g063350.t1.1	7.99689	8.75367	11.2865	12.8663	8.1896	10.7253	11.8784	12.4546
Cre01.g063400.t1.1	49.1547	15.9626	45.0684	43.9914	101.493	85.034	85.5022	28.5678
Cre01.g063450.t1.1	4.82166	4.51671	5.44101	5.64293	12.636	12.3513	9.67735	13.7418
Cre01.g063500.t1.1	18.8738	16.9729	27.003	26.1721	17.252	13.9929	18.0385	17.5385
Cre01.g063550.t1.1	13.0916	14.8281	16.6875	18.1939	8.47669	8.37776	8.60903	10.8562
Cre01.g063600.t1.1	50.4475	49.796	43.2006	44.8504	63.6466	59.3323	44.4547	46.0107
Cre01.g063700.t1.1	115.7	115.578	96.5817	101.074	114.149	101.719	88.4619	82.9493
Cre01.g063750.t1.1	0.43061	0.179791	0.225607	0.110108	0.381047	0.478879	0.428015	0.160883
Cre01.g063800.t1.2	7.24666	5.58907	3.32211	5.13432	4.00786	5.35399	3.80782	3.29033
Cre01.g063850.t1.2	10.024	11.1052	6.05935	6.3909	9.0665	9.0924	4.3205	5.41332
Cre01.g063900.t1.1	8.61285	8.56939	9.57703	9.84019	9.24312	7.92531	10.6784	8.30721
Cre01.g063950.t1.1	0	0	1.2519	0	0	0	0	1.19033
Cre01.g064000.t1.1	0.889915	2.88992	1.08791	1.46013	4.85617	3.46384	2.06395	1.68091
Cre01.g064050.t1.2	1.32325	2.25599	1.92097	2.17113	2.24431	2.3845	2.39763	2.21101
Cre01.g064100.t1.1	2.42916	2.25385	2.54539	3.00218	4.19677	5.2028	2.0121	2.11767
Cre01.g064150.t1.1	5.75461	4.32766	3.23978	3.61413	3.84153	4.8902	5.9708	5.54478
Cre01.g064200.t1.1	5.92645	6.81001	3.06521	1.76798	4.70645	4.46896	1.05731	1.72217
Cre01.g064250.t1.2	0.813265	0.858329	0.807795	0.970452	0.779631	0.996546	0.471545	0.945309
Cre01.g064300.t1.1	1.0441	1.01719	0.319101	1.66121	1.53988	1.00345	0.706287	0.809084
Cre01.g064350.t1.1	12.0488	11.8701	13.7158	14.4179	11.8599	12.8223	18.4857	21.0076
Cre01.g064400.t1.1	36.6715	35.9216	71.8392	69.4052	73.5903	71.4122	96.0311	95.7329
Cre01.g064450.t1.2	23.5758	18.7147	5.33725	8.33554	19.5744	15.6088	9.87251	10.1495
Cre01.g064500.t1.1	6.18985	6.41687	3.2742	2.55677	4.49428	4.1871	2.00155	2.28298
Cre01.g064550.t1.1	0.605905	0.843269	0.476173	0.464794	2.68083	2.24608	0.225845	1.05642
Cre01.g064600.t1.2	0.624537	0.30422	0.668054	0.745246	1.84218	1.44053	0.814763	0.81668
Cre01.g064650.t1.1	0	0	0	0	0.0836955	0	0	0
Cre01.g064700.t1.1	11.734	11.2955	9.862	11.3766	9.14732	10.6328	7.53254	9.86406
Cre01.g064750.t1.1	3.57598	5.84782	1.75645	1.60018	7.68494	8.94787	2.99905	3.78546
Cre01.g064800.t1.2	0.690489	0.80723	0.379852	0.865143	2.32185	1.79174	0.960858	1.68546
Cre01.g064850.t1.2	1.62761	1.94604	1.08531	1.58907	1.89854	1.66379	2.44508	2.19285
Cre01.g064881.t1.1	0	0	0	0	3.13991	0	1.54303	1.54666
Cre01.g064900.t1.2	0.822471	0.534181	0.251366	0.368038	0.727805	1.54138	0.119221	0
Cre01.g064950.t1.2	0.394103	0.213303	0.160596	0.117569	1.27872	0.984777	0.380846	0.229045
Cre01.g065000.t1.1	1.40206	1.2521	0.857005	1.04566	1.24069	2.02122	0.914558	0.814853
Cre01.g065050.t1.2	0.384516	0.262224	0.28204	0.412951	0.748569	0.897998	0.936386	1.03915
Cre01.g065100.t1.2	0.312093	0.608098	0.286148	0.698277	1.24277	1.34974	0.271436	0.408111
Cre01.g065150.t1.1	23.2379	31.4515	16.5873	18.8429	30.9139	24.8214	26.5858	31.1351
Cre01.g065200.t1.2	0	0.0676381	0	0	0.430055	0.420366	0.0603829	0.12105
Cre01.g065250.t1.2	4.9309	4.39497	0.673338	0.563355	5.84875	5.89846	0.273736	1.46336
Cre01.g065300.t1.1	0.255544	0.248958	0	0	0.452263	0.221036	0	0
Cre01.g065350.t1.2	0.284615	0	0	0.254719	0.251856	0	0.330049	0.165413
Cre01.g065367.t1.2	0.500797	0.780623	3.30599	4.21301	1.32947	1.03961	6.01067	6.28676
Cre01.g065378.t1.1	0.458885	0.447058	1.05184	0.410683	0	0.396919	0.598657	0.200022
Cre01.g065400.t1.1	1.70074	2.3933	2.94544	2.3677	2.50831	4.08632	2.30094	2.96531
Cre01.g065450.t1.2	0	0	0	0.0912797	0	0.0882203	0.177412	0.0889148
Cre01.g065500.t1.1	5.74772	4.95347	6.68872	8.90303	6.84676	7.26613	21.3416	19.2719
Cre01.g065550.t1.1	0.314738	0	0.0961911	0	1.11405	0.81671	0.182491	0.27438
Cre01.g065600.t1.1	150.124	149.485	164.178	173.744	147.517	131.416	131.615	131.137
Cre01.g065650.t1.1	25.3221	25.3547	31.1173	34.1508	44.6595	43.9575	66.2228	66.072
Cre01.g065700.t1.2	9.3891	10.5022	9.88391	6.53555	7.69299	7.21886	3.62931	6.66939
Cre01.g065750.t1.2	0.681511	0.474247	0.17853	0	0.689223	0.589482	0.254026	0.0848746
Cre01.g065800.t1.2	0.21685	0	0.198822	0	0.19189	0	0.377199	0.189043
Cre01.g065850.t1.2	3.93625	4.53203	4.46206	4.48354	3.86318	4.14755	2.9255	3.80586
Cre01.g065900.t1.1	2.69424	2.35559	2.2169	2.65854	3.54564	4.36207	5.94826	4.99866
Cre01.g065950.t1.1	17.8174	19.708	11.414	10.5842	11.1537	10.5659	12.0451	11.1239
Cre01.g066000.t1.1	0.217782	0.848675	2.99516	3.89812	2.31259	2.26048	7.57643	7.21454
Cre01.g066050.t1.1	5.5145	6.32745	9.88741	8.77377	3.36163	3.28588	8.5264	6.30301
Cre01.g066100.t1.2	0.510553	0.213169	0.267491	0	0.322707	0.189261	0.634345	0.317919
Cre01.g066150.t1.1	2.05784	2.5776	2.29107	2.36788	6.76366	8.89977	10.4829	9.09797
Cre01.g066250.t1.1	6.68671	7.93938	10.7289	11.0336	6.84162	6.68747	5.45213	7.10444
Cre01.g066300.t1.1	6.5644	4.66677	5.85602	6.03364	8.00678	6.44525	6.01783	6.95999
Cre01.g066350.t1.2	0.338964	0.192632	0.233089	0.202239	0.64989	0.806275	0.147403	0.295499
Cre01.g066400.t1.1	236.576	248.613	260.042	255.343	224.021	219.266	189.272	184.111
Cre01.g066450.t1.1	20.0415	23.4962	26.1616	24.9285	21.0413	21.1548	28.9526	27.5401
Cre01.g066500.t1.1	14.8584	14.0677	12.6638	11.6121	24.815	24.2559	17.655	15.5073
Cre01.g066550.t1.1	9.71663	8.06379	6.59916	7.24665	13.3751	16.6534	9.23328	9.88246
Cre01.g066600.t1.2	1.04288	0.738908	0	0.169697	0.0838949	0.164009	0.0824562	0.247951
Cre01.g066650.t1.2	31.4533	31.6002	38.8211	43.0361	29.1043	30.5413	48.3329	48.1829
Cre01.g066700.t1.2	0	0	0	0	0.251172	0	0	0.164964
Cre01.g066750.t1.2	3.39586	3.1873	2.39212	1.96433	5.16713	4.76414	3.67382	3.97129
Cre01.g066800.t1.2	0.707818	0.558227	0.618072	0.754129	0.864958	0.845469	1.26053	1.05781
Cre01.g066850.t1.1	0.42787	1.45895	1.76535	1.14878	4.92209	7.58688	5.02375	4.47606
Cre01.g066900.t1.2	0.349615	0.243288	0.320551	0.35759	0.574553	0.561607	0.390946	0.304785
Cre01.g066950.t1.2	1.19099	1.1603	0.63699	0.577356	1.40521	1.4594	0.733718	0.346091
Cre01.g067000.t1.2	0.0205083	0	0	0.0367081	0.0544434	0.0354778	0.0356732	0
Cre01.g067050.t1.2	0.139272	0	0.766162	0.498569	0.492966	0.481859	0.242256	0.121413
Cre01.g067059.t1.1	20.7633	20.8195	21.0411	23.4723	16.5468	13.9685	17.0023	15.0311
Cre01.g067100.t1.1	0	0	0	0	2.16213	0	0	0
Cre01.g067140.t1.1	1.32482	1.29067	2.1257	1.18566	0.586167	0.7162	0.576115	0.433103
Cre01.g067150.t1.1	7.56753	10.2081	15.0777	13.8057	4.63605	4.40571	14.5556	17.381
Cre01.g067200.t1.2	1.85814	2.06885	1.29803	0.712695	1.56597	2.21949	0.307822	0.617093
Cre01.g067250.t1.2	0	0	0	0	0.223669	0	0.219833	0.220351
Cre01.g067278.t1.1	1.97548	2.99377	2.01251	1.96442	2.13658	2.27829	2.09994	1.33947
Cre01.g067300.t1.2	4.56941	4.26614	4.71323	5.62296	4.21195	4.77577	2.9806	3.65152
Cre01.g067350.t1.2	3.36101	4.09297	2.1186	2.63197	1.67296	1.99866	2.19237	2.0144
Cre01.g067400.t1.2	0.813859	0.792882	0.466376	0.546278	1.44037	2.11187	0.530876	0.35475
Cre01.g067401.t1.1	0.741793	2.16802	0	0.165968	0	0.962435	0	0
Cre01.g067450.t1.1	0.865425	1.44535	1.02019	0.885166	2.84446	2.13874	2.043	2.0478
Cre01.g067500.t1.2	1.89485	3.56017	3.47466	1.93807	1.43722	1.63898	0.706287	0.82594
Cre01.g067600.t1.1	4.08182	3.97661	1.72155	2.6302	1.95048	3.10695	1.56203	1.42337
Cre01.g067650.t1.1	0	0	0	0.246207	0	0.118978	0.119633	0
Cre01.g067700.t1.1	6.75518	5.60091	5.53471	5.1452	5.34174	6.34025	5.50014	5.76368
Cre01.g067800.t1.1	0	0	0.200619	0	0	0	0	0
Cre01.g067900.t1.1	16.1501	15.3802	9.15069	6.33362	9.47395	7.84787	5.0503	4.90398
Cre01.g067950.t1.2	4.06209	2.4027	2.12823	2.59672	4.87831	5.39582	4.16378	5.69124
Cre01.g068000.t1.2	2.31009	1.73119	1.62927	3.8168	1.41521	2.76666	2.00914	2.09133
Cre01.g068050.t1.2	0.341771	0.499443	0.156679	0	0.604867	0.591238	0.743118	0.148973
Cre01.g068100.t1.1	7.70633	6.91499	6.87975	7.16909	5.83233	8.2444	6.08507	4.41984
Cre01.g068150.t1.1	159.776	164.326	207.502	215.701	148.917	149.912	190.777	198.308
Cre01.g068200.t1.1	5.00323	5.93775	5.17114	5.04757	4.26637	6.21601	6.17113	6.82007
Cre01.g068250.t1.1	1.97294	1.92209	13.4847	11.0757	4.92014	5.58497	27.7667	26.8938
Cre01.g068300.t1.2	4.24738	2.89654	5.452	5.39775	7.5922	5.51074	6.20602	6.44278
Cre01.g068350.t1.2	0.445848	0.325767	0.170326	0.199508	0.690429	0.514189	0.226196	0.323898
Cre01.g068400.t1.2	0.161975	0.473401	1.13857	1.83617	0.191109	0.653811	0.328706	0.470685
Cre01.g068450.t1.2	0	0	0	0	0	0.084715	0.0851815	0
Cre01.g068500.t1.2	1.25724	1.3093	2.86193	1.97876	2.14834	2.06243	6.07055	5.6313
Cre01.g068550.t1.1	9.96368	7.85114	13.9718	14.6869	8.42789	8.87168	9.55772	10.0912
Cre01.g068600.t1.2	6.40092	5.33072	4.63824	3.23386	7.39998	7.05465	4.30997	4.68012
Cre01.g068650.t1.2	0	0	0	0.257659	0.764289	0.622557	0.500788	0.376475
Cre01.g068677.t1.1	45.2153	40.3098	39.8921	35.1213	22.2703	19.5548	23.0014	23.7992
Cre01.g068750.t1.1	3.81184	2.89841	2.72777	2.91221	4.27808	3.7796	1.29376	1.21575
Cre01.g068800.t1.1	0.0875372	0.0852809	0	0.0783422	0.0774617	0.0757164	0.152267	0.0763125
Cre01.g068850.t1.2	1.25336	1.22105	0.984995	0.961458	2.05975	2.06496	0.6229	0.728427
Cre01.g068900.t1.2	0.613025	0.783857	0.526934	0.445764	1.01713	0.961067	0.433196	0.835028
Cre01.g068950.t1.2	0.134416	0.0654757	0.308104	0.240593	0.148681	0.37786	1.16905	0.76167
Cre01.g069010.t1.1	0.971381	1.23025	1.46954	1.30402	1.89107	1.17629	1.30949	1.77833
Cre01.g069050.t1.2	3.40665	4.09974	2.57225	3.94551	8.8663	6.06657	13.0714	13.6262
Cre01.g069100.t1.2	26.8179	27.3888	22.6879	26.0879	19.3747	18.602	48.3386	44.6123
Cre01.g069150.t1.1	23.7324	23.6075	25.8823	23.6988	29.8433	31.3316	31.7215	31.1427
Cre01.g069200.t1.1	0.789075	0.512491	0.723477	0.470793	1.70684	1.0617	1.60132	1.45222
Cre01.g069233.t1.1	3.29248	1.92457	1.20751	1.17865	1.16541	3.41744	0.57271	2.87029
Cre01.g069250.t1.1	0	0.101863	0	0	0	0.090439	0	0
Cre01.g069300.t1.2	0.876229	0.426822	0.892651	0.65349	1.24922	1.51581	1.27013	1.35799
Cre01.g069350.t1.1	0.541387	0.527432	0.99276	0.847907	3.11398	2.80967	2.00115	1.88786
Cre01.g069400.t1.1	39.2362	45.8049	56.7641	60.5804	31.671	32.5918	72.6962	68.8944
Cre01.g069450.t1.2	8.43476	5.15974	13.1291	9.83095	15.6222	17.8152	31.2204	35.5689
Cre01.g069550.t1.2	3.44099	4.64164	8.41314	8.60692	3.90376	4.12106	11.6639	8.53776
Cre01.g069600.t1.1	6.77945	7.01241	1.45804	2.39697	7.48041	9.91807	1.01911	1.16743
Cre01.g069650.t1.2	0.212466	0.62097	0.389607	1.14089	0.376023	0.367551	0.554362	0.370444
Cre01.g069700.t1.2	0.0940707	0	0	0	0.0832432	0.162735	0.0818157	0.0820082
Cre01.g069750.t1.2	0.223371	0.217613	0.204801	0.199908	0.790644	0.386415	0.0971357	0.0973642
Cre01.g069800.t1.2	3.35946	3.55747	2.14274	0.653605	4.52381	2.14777	1.52442	1.65534
Cre01.g069850.t1.1	3.78456	3.24457	2.49836	3.38702	5.22437	5.76136	9.34793	11.2175
Cre01.g069865.t1.1	0.699105	0.875681	0.732556	0.62567	1.23728	1.46856	0.173723	0.435329
Cre01.g069900.t1.2	0	0	0.186007	0.272343	0.0897608	0.438692	0.0882215	0.0884291
Cre01.g069950.t1.2	0.956783	1.28167	0.548277	1.17739	1.48165	1.75861	0.728121	0.625572
Cre01.g070000.t1.2	0.0966158	0.0470628	0.0885839	0.0648504	0.299234	0.376061	0.273095	0.252681
Cre01.g070050.t1.2	1.88991	1.27467	3.19901	4.03331	2.18696	1.88619	2.40233	2.91493
Cre01.g070100.t1.2	0.119855	0	0.329674	0.429061	0.5303	0.622021	0.104241	0.313459
Cre01.g070150.t1.2	0.36809	0.521603	0.429532	0.329425	0.858723	0.810431	0.26193	0.233375
Cre01.g070200.t1.2	2.53129	2.07148	1.48535	2.44663	2.41914	2.36463	2.02541	2.20671
Cre01.g070250.t1.1	17.8268	18.3171	26.5603	31.5345	19.1025	18.3106	37.3075	35.574
Cre01.g070300.t1.1	0	0.161622	0.0760534	0	0.293607	0.143496	0.072143	0.0723128
Cre01.g070350.t1.1	0.37641	0.550062	0.949075	0.842178	0.915985	0.488371	0.49106	1.06647
Cre01.g070400.t1.2	0	0	0.0484238	0.0472667	0.186942	0.137047	0.0918682	0
Cre01.g070450.t1.2	2.47841	1.8725	1.57675	2.26334	2.4617	2.49373	2.19953	2.68974
Cre01.g070487.t1.1	16.6019	20.6668	27.9066	22.2871	17.1396	15.9556	10.4283	6.43248
Cre01.g070500.t1.1	35.451	30.8368	27.5702	30.1691	10.6436	10.4038	10.4611	10.7616
Cre01.g070550.t1.1	0	0	0	0.141038	0.139453	0.136311	0	0
Cre01.g070650.t1.1	13.264	12.049	14.4621	12.8332	10.9442	10.5426	9.8212	8.12546
Cre01.g070700.t1.2	0.770353	1.26399	0.743486	0.508004	1.61452	1.36772	0.952099	0.530188
Cre01.g070750.t1.2	0.193209	0.439202	0.118098	0.172914	0.512913	0.334238	0.224052	0.336869
Cre01.g070800.t1.2	0.477776	0.0581827	0	0	0.422784	0.258286	0.0519418	0.0520639
Cre01.g070801.t1.2	0.13851	0.472289	0.507981	0.309901	0.796689	1.61738	1.26489	1.08674
Cre01.g070850.t1.2	1.66171	1.0118	0.190445	0.557684	0.735222	1.07798	0.180653	0.362157
Cre01.g070900.t1.1	4.09509	3.98954	1.27517	1.2447	7.52099	6.54954	3.4944	2.82904
Cre01.g071000.t1.2	0.964096	0.939246	0.810286	1.15043	0.853129	1.45934	0.419249	0.350197
Cre01.g071050.t1.1	28.4819	34.6455	29.5075	29.5225	22.6406	19.0684	15.6746	15.2906
Cre01.g071082.t1.1	0.153849	0.299767	0.141059	0	0.272282	0.133074	0.0669032	0
Cre01.g071100.t1.2	0.339963	0	0.207801	0.101418	0.100278	0.490093	0.0985583	0.19758
Cre01.g071150.t1.1	0.687034	1.14742	1.34983	0.527029	0.607957	0.933835	0.170723	0.0855624
Cre01.g071200.t1.2	1.67978	2.10405	1.76015	1.87917	2.01731	3.00967	2.13924	1.62128
Cre01.g071250.t1.1	4.29078	3.30932	3.52428	3.84007	2.29397	2.01032	2.56562	2.88337
Cre01.g071300.t1.1	0.13718	0.200466	0.314439	0.306925	0.789038	0.949242	0.119309	0.239179
Cre01.g071350.t1.1	48.8548	44.0143	32.0729	33.0045	46.0648	45.5397	33.7241	28.3246
Cre01.g071400.t1.2	9.99604	8.0529	5.46378	7.74176	1.87116	2.16155	0.501566	1.17307
Cre01.g071450.t1.2	13.5706	13.5319	10.2467	10.4781	7.7232	6.44443	3.84166	2.87643
Cre01.g071500.t1.2	2.62172	2.36394	2.65949	3.17004	6.98456	6.70656	5.84598	5.27619
Cre01.g071550.t1.2	5.21422	4.57184	4.11144	4.75984	3.69125	3.69828	1.81397	1.63642
Cre01.g071559.t1.1	0.611288	0.694787	1.40117	1.36769	0.901548	0.793111	0.265826	0.799355
Cre01.g071600.t1.1	0	0	0	0	0	0	0.395844	0
Cre01.g071650.t1.2	32.1479	32.6856	45.5978	42.2876	46.5855	48.0553	81.2525	78.7163
Cre01.g071700.t1.2	0	0	0	0	0	0	0	0.275939
Cre01.g071750.t1.1	1.62258	2.28332	1.15709	1.45214	1.91443	1.55941	0.3136	0.157169
Cre01.g071800.t1.1	0.297589	0.289919	0.5457	0	1.58002	0.514807	0.258821	0
Cre01.g071818.t1.1	0	0	0.532057	0.519343	0.256753	0	0.504701	0
Cre01.g071850.t1.2	0.304087	0.296249	0.278807	0	0.538173	0.263024	0.793416	0
Cre01.g071862.t1.1	9.21977	8.98213	9.42869	6.98188	14.7482	12.7289	16.8084	11.5926
Cre01.g071900.t1.1	0.202724	0.592498	0.371743	0.36286	1.43513	0.701396	0.528944	0.353459
Cre01.g071950.t1.1	3.80196	3.50902	2.38508	2.32809	5.66628	4.84628	6.78735	6.80332
Cre01.g072000.t1.1	4.75992	3.43499	4.84913	4.25993	3.90005	4.87959	4.29315	5.68644
Cre01.g072050.t1.1	0.483862	0.491032	0.369698	0.433037	0.535213	0.802168	0.473431	0.351515
Cre01.g072100.t1.2	1.66792	0.812467	0	0	0.737974	0	0	2.9081
Cre01.g072150.t1.1	0	0.096024	0.271112	0.0882112	0.348879	0	0.0857241	0.0859258
Cre01.g072200.t1.1	158	153.497	184.88	177.495	167.19	175.751	171.53	168.274
Cre01.g072250.t1.2	3.5129	3.20845	2.18079	2.48892	3.36761	2.94357	1.94136	2.58394
Cre01.g072300.t1.1	7.19243	8.28106	4.79601	7.60728	6.07529	6.64536	4.26508	3.9901
Cre01.g072350.t1.2	10.2796	12.4375	16.4178	15.1351	12.3242	14.341	18.746	12.1413
Cre01.g072400.t1.1	1.97441	1.92352	1.11401	1.35924	4.0319	2.8901	4.62321	5.69331
Cre01.g072450.t1.1	3.43253	4.21103	8.15934	7.96437	12.0373	14.6251	15.3691	18.3976
Cre01.g072500.t1.1	1.56705	0.76333	3.59195	3.1555	9.36012	7.11606	23.1694	20.1501
Cre01.g072550.t1.1	0.609504	0.890691	0	0	1.61805	1.318	1.32525	1.32837
Cre01.g072551.t1.1	10.9398	10.4528	11.8628	13.1797	7.53971	8.09771	7.31892	7.06104
Cre01.g072600.t1.1	2.64022	2.40069	1.29106	1.37835	4.75055	4.22483	5.51105	5.10204
Cre01.g072650.t1.1	20.3923	20.7546	41.4678	46.0845	28.9328	28.2809	64.5026	60.5824
Cre01.g072700.t1.1	33.9769	34.9583	38.5549	37.2321	45.9427	45.0046	56.468	56.7963
Cre01.g072750.t1.1	0.165898	0.646489	0.152107	0.148472	0.734018	0.430488	0.432858	1.01238
Cre01.g072800.t1.2	13.777	12.9917	9.06893	8.53607	12.2695	14.1319	11.0605	10.9326
Cre01.g072900.t1.1	0	0	0	0	0	0	0.545622	0
Cre01.g072950.t1.1	1.24198	0.87998	1.24226	1.91991	3.19719	3.51579	3.73155	4.23248
Cre01.g073000.t1.2	5.32194	4.34851	4.64341	3.38013	5.39301	5.56848	4.25535	3.89121
Cre01.g073050.t1.2	12.0235	11.7478	7.02694	7.17366	8.58632	8.27121	8.5308	7.07975
Cre02.g073150.t1.1	10.8294	8.34211	6.00368	3.3809	2.45146	5.01029	1.75231	1.75643
Cre02.g073200.t1.1	2.90773	3.416	3.52853	3.82691	10.2165	12.5754	7.66116	7.1573
Cre02.g073250.t1.2	8.32993	8.64068	6.64842	6.86498	4.93179	5.02801	4.16964	3.76151
Cre02.g073300.t1.2	0	0	0	0	0	1.15002	0.289089	0.869306
Cre02.g073350.t1.1	5.92645	0	10.8675	0	2.62216	0	2.5772	2.58326
Cre02.g073400.t1.2	6.9959	8.66764	9.20315	11.2971	18.5048	16.6408	10.5156	12.4628
Cre02.g073450.t1.2	0.26396	0.192867	0.121008	0.0590582	0.291973	0.627867	0.114786	0.0575281
Cre02.g073500.t1.2	1.80638	1.75982	1.65621	1.40108	2.02472	2.70824	2.93263	2.83455
Cre02.g073550.t1.1	86.4868	84.9398	62.9239	62.517	68.0114	68.2962	62.5816	62.7288
Cre02.g073600.t1.2	19.8654	23.3073	20.9559	19.3081	24.3837	29.9314	36.0412	33.1465
Cre02.g073650.t1.1	53.9116	64.8884	53.2221	53.2267	51.8713	53.5399	45.2758	45.8796
Cre02.g073700.t1.1	34.5894	32.739	21.2715	22.6508	35.9584	37.0941	26.0478	23.2898
Cre02.g073750.t1.1	6.53997	6.56448	3.17985	2.66046	5.87491	5.3997	3.79199	3.62814
Cre02.g073800.t1.1	6.30881	7.63619	8.41359	7.35707	11.1653	10.2523	5.98574	6.9998
Cre02.g073850.t1.1	15.889	12.0045	17.5412	20.6044	6.02578	8.4143	8.46064	5.08833
Cre02.g073900.t1.2	4.07157	4.19996	4.61147	3.85823	3.60294	2.48595	3.54115	2.50552
Cre02.g073950.t1.1	2.7175	2.42683	1.66106	1.62136	1.20236	0.979388	0.196956	0.592259
Cre02.g074000.t1.2	0.0353976	0	0	0	0.0313233	0.0306176	0	0
Cre02.g074050.t1.2	8.02088	8.52452	10.0283	8.8098	2.58098	4.88797	4.75634	3.81402
Cre02.g074100.t1.1	125.611	128.595	96.9496	98.4437	82.2657	87.7781	53.389	51.9679
Cre02.g074150.t1.2	18.5278	15.9139	15.2642	15.8206	27.6026	26.5549	18.8776	21.0678
Cre02.g074200.t1.1	0.712995	1.04193	0	0.10635	0.315465	0.205571	0	0.103595
Cre02.g074217.t1.1	0	0	0.43656	0.426128	0	0	0.414113	0
Cre02.g074250.t1.2	3.18924	3.72845	2.33929	2.63468	2.86558	2.92833	3.32852	3.33635
Cre02.g074300.t1.2	0.514279	0.381732	0.224536	0.328756	0.585111	0.33892	0.127795	0.192143
Cre02.g074350.t1.2	0.685465	0.906296	1.16718	1.27074	0.433263	0.338801	1.022	0.725619
Cre02.g074370.t1.1	2.96471	2.79803	2.12363	1.90705	2.9514	2.24381	4.06916	2.38263
Cre02.g074400.t1.2	1.83925	1.79184	1.3116	1.5546	2.98384	3.71205	2.31059	3.11773
Cre02.g074406.t1.1	0.178439	0.17384	0	0	0.315802	1.38909	0.465579	0.155558
Cre02.g074450.t1.2	31.7608	32.1415	20.5424	21.1532	58.9701	61.6166	49.8931	49.4381
Cre02.g074500.t1.1	0.415736	0	1.14353	1.1162	1.83943	1.43839	4.33892	1.44971
Cre02.g074550.t1.1	36.7	26.2807	22.7203	24.4232	28.5898	29.8449	17.4599	22.6966
Cre02.g074600.t1.2	4.75187	4.35707	3.97241	4.37781	3.95758	5.43996	3.88971	4.87358
Cre02.g074650.t1.1	36.6651	40.158	59.1863	56.6782	31.2651	26.8127	88.0317	88.7231
Cre02.g074700.t1.1	17.9466	16.3281	15.3668	16.9906	25.1996	20.6548	22.0585	25.7308
Cre02.g074720.t1.2	0.526547	0.341983	0.321849	0.314159	2.64034	0.607258	1.06855	1.07107
Cre02.g074737.t1.1	0	0	7.19401	7.0221	0	6.78675	10.2362	13.6804
Cre02.g074750.t1.2	0.208335	0.202965	0.191015	0.186451	0.322622	0.405454	0.135896	0.227025
Cre02.g074800.t1.2	0.127757	0.124465	0.117137	0.142922	0.452211	0.414396	0.722241	0.863159
Cre02.g074839.t1.1	0.675666	1.3165	1.85849	1.96525	4.48423	5.55204	7.49246	5.89027
Cre02.g074850.t1.2	0.21858	0.212946	0	0.39124	1.80527	1.32344	0.570313	0.571655
Cre02.g074900.t1.2	15.864	15.0399	12.5479	14.8333	8.42284	8.84746	7.74298	7.43093
Cre02.g074950.t1.2	0.742123	0.88366	0.302412	0.442779	0.364836	0.285293	0.215148	0.0718846
Cre02.g075000.t1.2	3.47455	1.41041	0.265475	0.777395	2.81841	1.75313	0.755477	1.26209
Cre02.g075050.t1.1	5.82201	4.22616	1.57	2.45198	13.0313	11.849	5.16284	5.27451
Cre02.g075100.t1.1	0.686068	2.67354	1.25807	2.30251	9.10652	6.97271	11.4863	11.9619
Cre02.g075150.t1.1	5.07888	5.42126	5.62848	5.25684	9.77022	9.58829	10.2557	9.93328
Cre02.g075200.t1.2	1.45592	1.09603	0.606765	1.1253	1.22978	1.31655	0.460454	0.749998
Cre02.g075250.t1.1	9.94798	11.0439	8.0604	9.11007	4.29913	5.2028	3.42056	3.63029
Cre02.g075300.t1.2	0.902408	1.61177	0.965287	1.34603	0.798542	0.650458	1.17727	1.44227
Cre02.g075350.t1.1	0.384551	0.24976	0.587638	0.458877	1.58802	0.332622	1.11485	0.670482
Cre02.g075400.t1.2	23.3868	24.9748	20.0681	21.0644	30.3793	33.8443	29.8583	33.8493
Cre02.g075450.t1.2	0	0	0	0	11.7373	19.1214	11.536	0
Cre02.g075500.t1.2	17.5553	15.3925	16.9901	20.25	16.2251	14.8472	19.0005	18.0249
Cre02.g075550.t1.1	2.74157	3.20509	4.02185	4.25289	7.60152	7.43024	5.56363	5.09871
Cre02.g075600.t1.2	0.63808	0.580192	0.312019	0.380704	0.45171	0.625504	0.850931	0.296672
Cre02.g075650.t1.1	12.1617	11.5935	14.1482	12.7568	16.5479	15.4964	25.2492	22.1166
Cre02.g075700.t1.1	2234.4	2250.05	2316.18	2281.46	3269.28	3276.59	2932.13	3030.18
Cre02.g075750.t1.2	0.362451	0.485524	0.415399	0.486567	0.801832	0.979707	0.709274	0.355471
Cre02.g075800.t1.1	5.21861	3.3894	4.38604	3.69743	8.08142	6.39469	2.64761	3.60164
Cre02.g075850.t1.2	10.5338	8.20982	12.6935	12.5248	13.8489	14.7083	19.2392	18.3661
Cre02.g075900.t1.1	0.466767	0.56842	0.106991	0.104434	0.619564	0.201868	0.20298	0.203457
Cre02.g075950.t1.2	1.24877	1.54539	0.959289	0.694723	1.28423	0.992561	0.46966	0.353073
Cre02.g075994.t1.1	0	0	0.338261	0	0.326468	0	0.320869	0
Cre02.g076000.t1.1	5.90134	7.24404	10.064	12.253	6.99762	8.88172	16.3215	15.331
Cre02.g076050.t1.1	3.02638	2.83498	4.90924	5.62531	1.33902	2.51702	3.1383	3.24715
Cre02.g076100.t1.2	7.39	7.8137	12.6843	11.1274	5.85758	5.54383	15.0782	16.5792
Cre02.g076150.t1.1	7.82087	8.5403	13.317	11.9989	12.0161	10.556	15.398	14.9097
Cre02.g076200.t1.2	4.04371	4.70692	3.03345	3.14896	3.76417	5.22377	3.74529	3.7541
Cre02.g076250.t1.1	46.3444	45.3357	40.8305	45.1461	135.857	134.445	137.508	143.651
Cre02.g076300.t1.2	2.34859	0.686418	0.646005	0.420379	3.94872	6.09434	2.04263	3.89013
Cre02.g076350.t1.1	298.618	300.446	376.882	383.608	211.416	212.68	302.504	295.417
Cre02.g076400.t1.1	23.9419	21.0492	21.4161	26.1305	22.2197	15.1528	21.5847	25.4535
Cre02.g076450.t1.1	48.8377	51.5165	57.1302	55.9157	70.7857	69.1908	68.2536	70.0291
Cre02.g076500.t1.1	9.11464	9.70848	9.69402	10.3325	6.23736	5.78147	8.35002	8.58156
Cre02.g076550.t1.1	0.15728	0.306453	0.432616	0.281519	0.55671	1.22437	1.23112	1.23401
Cre02.g076600.t1.1	8.75488	8.30477	9.50573	9.69097	6.72783	5.57984	7.41397	8.43565
Cre02.g076615.t1.1	0	0	0	0	7.04238	0	0	6.93789
Cre02.g076650.t1.1	0.552665	0.807631	4.81385	3.9569	6.3577	5.01937	14.9007	13.4903
Cre02.g076700.t1.2	3.36843	2.94503	0.791899	1.62325	2.9043	2.54003	1.42725	0.978835
Cre02.g076750.t1.2	17.9834	19.6612	13.9236	15.3791	9.1945	10.8885	7.82033	5.22582
Cre02.g076800.t1.1	24.7349	26.0927	64.2802	60.6292	18.9602	20.7134	77.966	75.6772
Cre02.g076850.t1.1	1.82951	1.18824	0.55914	1.63734	1.75385	1.31872	0.928185	1.46201
Cre02.g076900.t1.1	19.5298	20.7331	19.9289	21.2528	32.0376	32.8872	26.9174	28.2816
Cre02.g076950.t1.2	2.99461	2.61262	3.64722	3.96007	2.76859	2.3196	4.19828	4.71469
Cre02.g077050.t1.2	1.56685	1.45708	1.82839	1.97592	0.630231	0.492824	0.867192	1.30385
Cre02.g077100.t1.1	28.234	28.3152	26.2131	27.6039	39.7858	41.0442	48.9052	50.9852
Cre02.g077150.t1.2	14.4372	14.0651	9.06445	11.7971	13.4698	12.8948	5.73226	7.52419
Cre02.g077200.t1.1	14.6394	12.9129	11.0644	10.0918	7.17742	6.84459	7.57051	5.69124
Cre02.g077250.t1.2	0	0.117119	0.220447	0.537947	0.319141	0.31195	0.731892	0.314406
Cre02.g077300.t1.1	68.6289	65.5016	48.4355	43.812	77.4544	73.4313	37.4568	38.3552
Cre02.g077350.t1.1	84.3679	89.8946	79.5944	77.0493	67.5349	68.1266	122.503	120.787
Cre02.g077400.t1.2	14.2159	13.5249	13.0341	13.2196	12.1866	13.7372	11.2048	13.7485
Cre02.g077450.t1.2	5.94316	5.46224	2.67314	3.61282	2.18302	3.68572	1.85301	3.03044
Cre02.g077500.t1.1	8.01986	6.09807	4.48363	5.42685	9.86625	7.44445	3.06223	2.21681
Cre02.g077550.t1.1	9.55593	8.38635	10.9338	9.54166	6.63904	8.06059	6.59388	5.92091
Cre02.g077600.t1.1	1.66047	1.6626	0.803504	0.866862	1.55098	2.27405	1.40404	1.28671
Cre02.g077650.t1.1	34.445	35.4068	32.8249	23.7876	20.4003	20.4098	14.3891	20.0976
Cre02.g077700.t1.2	4.16922	4.64201	4.05016	4.35316	4.34815	3.94966	5.95712	5.10576
Cre02.g077750.t1.1	5.28468	4.11878	3.95083	5.02062	19.4971	19.6204	13.0816	12.8288
Cre02.g077800.t1.1	535.732	544.838	425.929	416.582	279.074	287.777	193.94	205.593
Cre02.g077850.t1.1	30.3471	33.9393	10.789	10.1155	14.6602	11.2496	2.96256	2.02468
Cre02.g077900.t1.2	2.54442	1.79027	1.87928	1.77112	1.62613	2.26196	1.35236	1.04746
Cre02.g077950.t1.2	0	0	0.197975	0	0.191072	0	0	0
Cre02.g077958.t1.1	0	0.0750661	0	0	0.340917	0.266589	0.268057	0.335859
Cre02.g078000.t1.2	0.784629	1.52881	1.0791	1.22887	2.08296	1.44218	1.27952	1.19703
Cre02.g078050.t1.1	2.00151	1.08329	1.17244	1.34345	0.590379	1.25033	1.35393	1.55099
Cre02.g078100.t1.2	19.9059	18.1242	11.5562	11.7379	18.6025	20.2752	23.542	23.638
Cre02.g078150.t1.2	1.14614	1.32785	1.53369	1.46932	2.35738	2.08991	1.15848	1.35024
Cre02.g078200.t1.2	2.06438	2.58579	1.89276	2.3754	2.3487	4.08139	1.79544	3.08514
Cre02.g078250.t1.1	37.368	34.6338	51.6701	48.8085	54.1584	50.1427	88.5404	83.1138
Cre02.g078300.t1.1	4.76631	5.94363	6.81732	5.97191	10.7973	12.8628	12.7678	12.7978
Cre02.g078316.t1.1	0.284882	0.346924	0.261199	0.446176	0.945346	0.616031	0.557481	0.496704
Cre02.g078350.t1.1	0	0	0.1391	0	0	0.0656126	0	0
Cre02.g078400.t1.2	0	0.0986061	0.0928006	0	0.268695	0	0	0.0882363
Cre02.g078450.t1.2	3.50934	5.3271	3.06794	2.99463	3.61095	2.82367	2.41334	2.06328
Cre02.g078500.t1.1	4.19028	4.29713	7.48166	7.1055	3.70798	4.00595	5.17888	5.38332
Cre02.g078507.t1.1	120.889	123.844	77.7018	81.9796	67.8243	70.7876	56.5445	57.9451
Cre02.g078550.t1.1	3.79229	3.32509	2.78162	2.71515	11.4097	12.3007	19.9544	18.8442
Cre02.g078600.t1.1	11.8017	11.6091	10.0852	10.8697	11.5587	14.8661	15.9445	16.0819
Cre02.g078650.t1.2	2.16721	1.8891	0.941231	1.1229	3.33086	2.7625	0.793633	1.39212
Cre02.g078700.t1.2	0.208439	0.473821	0.382221	0.373088	1.90596	1.50243	1.26899	0.726843
Cre02.g078750.t1.2	1.30216	1.26859	0.651222	0.847547	1.9903	3.17417	1.85322	2.16717
Cre02.g078800.t1.1	0.327313	0.531461	0.200069	0.878795	0.289639	0.471856	0.854018	0.570685
Cre02.g078850.t1.2	2.73305	0.887535	1.67056	1.83448	1.0077	1.57599	1.58467	1.38985
Cre02.g078950.t1.2	0.199625	0.0648265	0.366059	0.178656	1.3543	0.920897	0.636603	0.116018
Cre02.g079000.t1.1	0.156926	0.305762	0	0.140442	1.11091	0.81441	0.136482	0.273607
Cre02.g079050.t1.2	0	0	0.0897671	0.175244	0	0.0846853	0	0.0853519
Cre02.g079100.t1.2	2.15567	2.25012	0.988232	1.51583	1.09003	1.46502	0.669586	0.671161
Cre02.g079150.t1.2	1.49822	0.851433	1.25919	0.670421	1.98866	1.83586	1.19445	1.41494
Cre02.g079200.t1.1	48.6235	41.2798	33.5421	31.9118	14.5472	14.2195	8.45783	8.47772
Cre02.g079250.t1.2	0.349709	0.170348	0.160319	0.0782438	0.773645	0.378107	0	0.22865
Cre02.g079300.t1.1	26.4731	25.9029	60.7864	62.9393	33.2039	30.8629	78.3829	82.28
Cre02.g079340.t1.1	0	11.3068	10.6411	5.19343	5.13507	5.01937	5.04701	0
Cre02.g079345.t1.1	3.09493	2.34512	1.57647	2.46207	2.4344	1.48722	3.2899	1.19914
Cre02.g079350.t1.2	0.662625	0.469488	0.0552308	0.0539111	1.11941	0.573145	0.314346	0.525143
Cre02.g079400.t1.1	40.7053	39.4485	32.8272	34.1408	72.7946	68.9424	55.7912	63.7256
Cre02.g079450.t1.2	1.96773	1.20701	1.13595	0.913131	1.16083	1.82809	1.83816	2.98609
Cre02.g079500.t1.2	0.447511	0.311412	0.234462	0.228859	0.113144	0.110594	0.0556016	0.278662
Cre02.g079550.t1.1	29.5632	29.5504	67.5288	70.4268	25.48	25.0537	66.1375	60.6321
Cre02.g079600.t1.1	164.48	157.663	166.709	171.013	62.6939	67.2569	65.1983	62.5326
Cre02.g079650.t1.2	4.68741	3.71519	2.11245	2.41748	2.39031	2.19902	2.41842	2.42411
Cre02.g079700.t1.1	3.41946	4.44176	2.61266	2.04018	11.0949	12.447	7.68281	5.58935
Cre02.g079750.t1.2	0.790048	0.937007	0.188966	0.768543	0.942284	1.15874	0.65725	0.449179
Cre02.g079800.t1.1	1332.21	1318.55	1140.33	1167.94	590.928	597.176	545.767	562.271
Cre02.g079850.t1.2	0.42067	0.409827	0.165299	0.268916	1.27629	1.19555	0.470401	0.419118
Cre02.g079900.t1.2	0.142332	0	0	0	0.503798	0	0	0.124081
Cre02.g079950.t1.1	0.770876	0.751007	0.471195	0.229967	0	0.22226	0	0
Cre02.g080000.t1.1	0	0	0	0	0	0.557707	0	0
Cre02.g080050.t1.1	0	0	0.0962636	0	0	0	0	0
Cre02.g080100.t1.2	1.06956	1.3397	1.12074	1.02558	2.43373	1.65201	0.730889	0.599406
Cre02.g080150.t1.2	0.877532	0.356214	0.938678	1.89794	1.55306	1.77108	5.8513	5.48256
Cre02.g080200.t1.1	292.309	295.845	287.999	279.215	603.332	609.316	636.375	624.583
Cre02.g080250.t1.1	16.8814	15.761	9.83499	10.5442	18.2062	19.7733	11.6234	13.0305
Cre02.g080300.t1.1	0.938786	0.914589	0.860743	1.13671	1.85693	1.67179	1.53692	1.39611
Cre02.g080350.t1.2	29.1374	33.1443	32.4073	34.6702	21.2422	22.3388	23.9737	25.9063
Cre02.g080400.t1.2	6.49599	4.69186	5.33983	5.31246	6.34295	5.52191	5.94195	4.78427
Cre02.g080450.t1.1	0.175582	0.171056	0	0.0628555	0.372895	0.334118	0.0305417	0.122454
Cre02.g080500.t1.1	4.70753	4.67272	2.52456	2.7027	4.87307	6.06933	2.781	3.01984
Cre02.g080550.t1.2	0.181975	0	0.0556157	0.108574	0.375737	0.209869	0.211025	0.158641
Cre02.g080600.t1.1	5.14551	4.1774	7.39114	7.98202	11.2314	12.0168	56.9839	55.7723
Cre02.g080650.t1.1	110.916	106.838	150.657	148.898	163.847	170.291	268.474	262.555
Cre02.g080700.t1.1	1337.25	1330.49	2088.96	2037.96	464.409	472.264	929.029	940.007
Cre02.g080750.t1.1	3.15332	3.69377	1.89303	1.8478	4.08591	4.8056	2.22014	1.96355
Cre02.g080800.t1.1	2.57655	1.61366	1.34992	1.48237	3.01284	2.30821	1.84073	2.32638
Cre02.g080850.t1.1	12.1768	12.3572	9.30373	7.26513	5.83658	5.04679	2.64761	1.76923
Cre02.g080900.t1.1	59.3579	61.4282	48.7057	48.162	90.5407	86.7027	78.3416	75.707
Cre02.g080950.t1.1	4.66659	3.8391	9.22285	9.65213	5.87302	6.63767	10.5525	11.7526
Cre02.g081000.t1.1	1.42114	0.197787	0	0.726778	1.79652	1.58044	0.353143	0.353974
Cre02.g081050.t1.1	414.329	419.115	310.261	314.75	220.667	230.075	114.832	110.52
Cre02.g081100.t1.1	12.3249	14.0085	24.1074	24.0215	22.9033	20.6105	41.6862	41.068
Cre02.g081150.t1.2	0	0	0	0.153029	0.15131	0	0	0.298129
Cre02.g081176.t1.1	1.15259	1.68433	1.40903	0.343841	1.86987	1.49543	0	0.334933
Cre02.g081200.t1.1	6.59274	8.18909	5.59132	6.63776	9.33428	9.26652	7.31069	7.75894
Cre02.g081250.t1.1	11.1758	12.5445	14.5904	13.6982	26.2285	29.2099	30.0047	30.8166
Cre02.g081300.t1.2	18.6496	17.7192	14.6444	15.0381	12.173	13.4959	10.1977	10.7046
Cre02.g081350.t1.2	3.80713	5.1926	5.39461	4.83206	4.83901	4.9096	5.59887	5.91376
Cre02.g081400.t1.1	3.91589	4.11614	2.26759	2.76676	5.01538	4.45671	3.585	3.77311
Cre02.g081450.t1.1	10.375	9.25104	10.4799	11.1738	9.02527	12.9287	8.8705	9.96446
Cre02.g081500.t1.1	5.16947	6.22123	4.87913	5.85112	2.95995	3.15628	2.38025	1.98821
Cre02.g081550.t1.1	10.2904	11.3923	6.2185	5.23268	14.2799	12.5421	4.67833	4.48545
Cre02.g081600.t1.2	21.3466	18.1968	25.0087	22.023	24.5303	23.3364	26.1725	26.4925
Cre02.g081650.t1.1	13.8418	12.9596	13.9272	17.0534	14.9528	15.7043	16.8071	17.3951
Cre02.g081700.t1.1	0.833606	0.696102	0.873493	0.532887	2.42373	2.36912	2.07145	1.97251
Cre02.g081750.t1.2	1.33722	1.82386	1.22606	1.31643	3.4316	4.27959	0.930413	1.3989
Cre02.g081800.t1.1	0.837977	1.07762	0.645383	0.539967	0.919492	1.30467	0.233219	0.204547
Cre02.g081850.t1.2	0.664781	0.259059	0	0	1.64714	2.18504	0.693813	1.5068
Cre02.g081900.t1.1	0	0	0	0.0833171	0.247142	0.805246	0.323872	0
Cre02.g081950.t1.2	0.0847409	0.0825567	0.155392	0.189599	1.08732	0.842924	0.847565	0.55406
Cre02.g082000.t1.1	0.69898	0.680964	0	0.0781947	1.39169	1.20918	0.30396	0.380844
Cre02.g082050.t1.2	1.14456	1.11505	1.81261	2.32802	2.67016	2.69999	2.89586	2.08629
Cre02.g082100.t1.2	12.9318	11.9354	13.5728	12.6394	12.3468	14.5706	10.5071	12.7569
Cre02.g082150.t1.2	5.88472	8.12181	3.14738	1.75553	2.6037	3.39337	2.55905	2.99258
Cre02.g082200.t1.2	6.66372	5.19357	4.48048	4.37342	4.32427	3.07406	3.47736	5.03468
Cre02.g082250.t1.2	43.3424	43.4064	44.4635	50.725	26.0162	23.5948	24.7792	24.5733
Cre02.g082300.t1.1	0	0.729473	1.20142	0.67012	2.15341	4.04788	0.814033	0.326379
Cre02.g082350.t1.2	18.4616	19.7212	12.9178	13.1889	23.6452	22.1319	18.8735	17.6473
Cre02.g082400.t1.2	0.176015	0.342956	0.161382	0.157526	0.623022	0.380615	0.382711	0.153445
Cre02.g082450.t1.1	4.66833	6.822	4.04244	4.71954	3.9015	3.8136	2.40602	2.26095
Cre02.g082500.t1.2	604.775	615.848	586.795	596.295	1237.45	1284.1	994.476	1021.85
Cre02.g082550.t1.1	59.5911	57.9086	65.399	61.6141	61.3878	58.3125	55.558	51.7531
Cre02.g082600.t1.2	26.4893	23.6999	14.3741	13.5468	22.0053	18.9377	11.8719	14.0205
Cre02.g082650.t1.1	0	0	0	0	0	0	0	0.256959
Cre02.g082700.t1.1	22.0749	25.9368	22.9859	24.3229	10.8959	8.25167	9.26189	9.5738
Cre02.g082750.t1.1	5585.04	5604.23	5049.81	5079.02	5887.01	5814.17	5574.61	5624.28
Cre02.g082800.t1.1	0	0	0.999559	0	1.44706	0	0.948166	0.475198
Cre02.g082850.t1.1	5.74613	6.71762	3.55619	2.69984	8.1356	10.3131	5.87212	7.88966
Cre02.g082900.t1.2	7.75307	8.10591	12.6567	12.0158	7.86471	8.50532	11.5125	10.8802
Cre02.g082950.t1.2	0.769103	0.37464	0.822693	1.03247	1.47459	0.886993	0.557424	0.670482
Cre02.g083000.t1.1	0	0.310603	0.292317	0	0.470208	0.551536	0.184858	0
Cre02.g083050.t1.2	11.0382	9.95709	5.74747	5.85405	6.75296	5.77571	3.79266	4.39558
Cre02.g083065.t1.1	5.23684	5.51553	3.50379	2.91339	2.63016	4.40725	2.21576	1.85081
Cre02.g083100.t1.1	0	0	0	0	0	0.391119	0	0
Cre02.g083200.t1.1	0	0	0	0	0.684676	0	0	0
Cre02.g083250.t1.2	0	0.152709	0.143718	0.140284	0.693538	0.135582	0	0
Cre02.g083259.t1.1	0.259291	0.442064	0.237735	0.232055	0.630979	0.897108	0.620158	0.734638
Cre02.g083300.t1.2	8.67061	7.49683	4.76988	4.46191	13.7148	12.1871	6.12711	8.31467
Cre02.g083350.t1.2	0.498289	2.42723	0	0	0.440936	0.431001	0	0.434394
Cre02.g083354.t1.1	3.30048	4.14619	0.875978	1.01051	3.30489	2.92992	0.906478	1.13576
Cre02.g083400.t1.2	2.57655	1.79296	1.9405	1.56472	2.52427	2.06943	1.36054	1.6044
Cre02.g083450.t1.2	0.106031	0.206596	0	0	0.281481	0.550277	0	0.277304
Cre02.g083500.t1.1	0.104402	0.101711	0	0	0.18477	0.0903034	0.181601	0
Cre02.g083550.t1.2	2.92562	3.32525	1.78827	0.981865	1.83379	2.10879	0.848162	0.531349
Cre02.g083600.t1.1	5.20372	5.63288	3.31328	3.49283	9.46537	8.12684	7.04014	6.42664
Cre02.g083650.t1.2	77.2087	78.325	196.082	207.703	78.1975	85.6945	105.579	104.04
Cre02.g083700.t1.2	1.55415	1.31872	1.33302	1.25629	1.73017	1.86465	1.26448	1.13634
Cre02.g083750.t1.2	0.0982863	0.0478765	0	0	0.13046	0	0.0854821	0.128525
Cre02.g083800.t1.1	32.0423	34.5024	37.6252	37.2292	67.4036	67.9514	67.8367	67.9963
Cre02.g083850.t1.2	13.8979	17.5303	14.0839	12.1762	14.6285	10.7558	7.8886	9.05497
Cre02.g083900.t1.2	9.0242	8.63826	4.37752	4.64856	4.7356	4.94657	3.60487	2.65284
Cre02.g083935.t1.1	0.593656	0.925367	0.326582	0.531297	1.78611	1.64317	1.54895	1.34558
Cre02.g083950.t1.1	106.276	107.052	65.6041	68.2069	99.6308	106.358	89.2936	83.9998
Cre02.g084000.t1.1	244.326	244.462	160.718	143.446	176.629	183.553	182.214	184.998
Cre02.g084050.t1.1	15.4175	17.1897	16.1777	15.0245	11.8239	10.6685	9.5353	11.0511
Cre02.g084100.t1.1	96.2315	96.1245	78.3039	83.5794	65.154	60.2909	69.5692	75.6325
Cre02.g084150.t1.2	0.509966	0.521663	0.303921	0.251019	0.947665	0.816037	0.776178	0.533489
Cre02.g084200.t1.1	5.73659	5.38174	1.94803	4.37342	6.01637	5.32949	2.40224	4.07489
Cre02.g084250.t1.1	3.26343	2.0572	5.80826	5.32586	16.9871	12.2042	24.1255	23.8475
Cre02.g084300.t1.1	10.9201	12.0677	11.2078	7.73089	13.4131	14.5206	9.63922	7.67268
Cre02.g084350.t1.1	30.9493	33.0449	17.9144	17.7661	21.1627	23.1195	9.51624	13.7629
Cre02.g084400.t1.1	0.234366	0.913299	0.429764	0.314621	2.59238	2.02717	1.32492	1.53235
Cre02.g084450.t1.1	1.66869	1.37558	2.94225	2.52731	8.74618	7.66089	7.03325	7.4974
Cre02.g084500.t1.2	2.80584	1.98801	1.22782	1.08434	1.97503	1.87537	2.21847	1.72335
Cre02.g084550.t1.1	4.31015	2.62441	2.30524	2.73233	4.76757	2.79609	7.4973	7.04525
Cre02.g084600.t1.1	5.88758	3.56017	3.72285	3.63389	3.4134	4.03891	1.236	1.4159
Cre02.g084650.t1.1	9.49952	10.3716	8.91003	10.0163	5.2176	4.67503	5.31805	5.80651
Cre02.g084700.t1.1	0.279943	0.409091	0.513342	0.501075	0.371583	0.36321	0.486947	0.488093
Cre02.g084750.t1.2	53.8209	52.3359	32.9592	38.1925	25.679	25.7953	19.8241	18.6453
Cre02.g084800.t1.1	1.96526	3.06338	0.961006	1.40706	3.82594	4.30636	2.05109	1.9417
Cre02.g084850.t1.2	4.84334	3.51378	2.74001	3.13566	2.55328	3.47623	2.95763	3.14425
Cre02.g084873.t1.1	2.97907	0	4.09712	1.33307	2.63618	0	0	0
Cre02.g084900.t1.1	3.74776	3.53338	2.54944	2.59672	3.53036	2.40511	2.94409	2.74023
Cre02.g084950.t1.1	7.85306	9.21201	6.90633	6.59787	6.52372	5.82223	5.43613	3.91204
Cre02.g085000.t1.2	3.16592	3.58902	1.47775	1.85457	4.27869	3.38566	2.40304	2.1076
Cre02.g085050.t1.1	1.34238	0.804786	0.615391	0.646893	1.59906	1.56303	0.538846	0.675142
Cre02.g085100.t1.1	0.67281	0.589922	0.925317	0.842992	1.01213	1.16391	0.526644	0.762498
Cre02.g085150.t1.2	0.176043	0.128629	0.121056	0.0787754	0.23367	0.228405	0.0382772	0.153469
Cre02.g085200.t1.1	14.0564	12.1201	13.6286	10.7002	9.15019	9.22352	7.026	9.85953
Cre02.g085250.t1.2	0	0	0	0	1.03347	0.505093	0	0
Cre02.g085257.t1.1	2.92338	3.47104	0.83761	0.981114	3.63783	4.34606	0.794544	0.955695
Cre02.g085300.t1.1	24.8699	29.3776	27.0779	20.5882	23.658	28.2339	16.7633	17.3447
Cre02.g085350.t1.2	1.74635	2.55201	0.800588	3.12583	5.40872	3.02106	11.3914	7.61211
Cre02.g085400.t1.2	2.28977	1.18098	0.370485	1.20544	3.3373	3.37861	1.17145	1.52647
Cre02.g085450.t1.1	47.2915	46.5041	24.5741	22.6983	44.9844	42.6297	26.3929	23.3654
Cre02.g085500.t1.2	0.661623	0	0	0	0.585471	0	0	0
Cre02.g085550.t1.1	1.93612	1.76047	0.946756	0.577583	2.74124	2.45619	0.673558	0.562619
Cre02.g085600.t1.1	7.07195	4.88944	6.27487	7.96241	5.65236	6.11697	3.37294	3.38087
Cre02.g085650.t1.2	2.9773	2.41714	2.12317	3.99685	3.80556	2.71833	3.45258	3.31651
Cre02.g085700.t1.2	3.27534	2.24043	1.46958	2.86893	1.97335	3.01388	3.39413	3.34137
Cre02.g085750.t1.2	0	0.0932522	0	0.0856649	0.0847021	0.0827937	0.0832496	0
Cre02.g085800.t1.2	0.571867	0.42856	0.322663	0.551167	1.12887	1.10344	0.535627	0.882028
Cre02.g085850.t1.2	0.82855	0.58705	0.276244	0.741518	1.59967	1.23788	0.26204	0.262657
Cre02.g085900.t1.1	21.1057	19.2925	19.3512	16.6734	22.3656	19.8333	20.9623	17.7179
Cre02.g085950.t1.1	15.049	13.5948	9.53313	5.38729	21.7913	19.6436	15.4682	14.5505
Cre02.g086000.t1.2	0.242142	0.0786334	0.148008	0.144471	0.142847	0.0698144	0	0.070364
Cre02.g086050.t1.2	0.341213	0.110806	0	0.10179	0.603879	1.18054	0.0989205	0
Cre02.g086076.t1.1	2.79943	2.18182	1.92503	1.50323	1.98178	3.02675	1.70432	1.70833
Cre02.g086100.t1.1	24.0058	28.2129	21.6608	17.733	39.1136	44.4945	26.5123	25.9103
Cre02.g086150.t1.1	0.74437	1.01526	1.22848	0.866035	0.592824	0.965778	2.78381	2.92015
Cre02.g086200.t1.1	3.91554	3.42	6.3135	7.12933	7.52712	8.40859	14.6786	12.006
Cre02.g086250.t1.2	19.4888	18.7281	32.2121	36.9003	22.5249	22.8201	23.9835	25.658
Cre02.g086284.t1.1	2.48699	0	2.28024	3.33864	0	3.22674	4.32601	5.42023
Cre02.g086300.t1.2	26.0385	23.8892	26.7459	29.0416	54.8751	52.0723	49.2941	51.2022
Cre02.g086350.t1.2	0.907307	1.17856	1.66376	1.35334	2.94388	3.40074	0.789109	2.3729
Cre02.g086400.t1.1	0.252304	0.1229	0.231329	0.338702	0.781423	1.20028	0.219435	0.879805
Cre02.g086450.t1.2	1.82225	3.55056	3.5802	3.02869	1.84286	0.675503	0.679223	0.907762
Cre02.g086456.t1.1	0	0	0	0	0	0.432549	0	0.435954
Cre02.g086500.t1.1	20.6725	25.0009	21.078	25.0401	17.5046	18.6516	18.1344	16.4681
Cre02.g086550.t1.2	2.62777	2.68804	1.68652	2.35174	4.18556	2.9548	2.74253	3.77984
Cre02.g086600.t1.1	37.1208	39.3786	35.9257	40.7272	53.8954	46.4973	65.5264	69.1563
Cre02.g086650.t1.1	0.198629	0.258012	0.182116	0.177764	0.644477	0.515419	0.575841	0.288598
Cre02.g086700.t1.1	5.93734	5.88404	6.66391	7.32921	7.33743	7.52628	12.3755	9.72733
Cre02.g086750.t1.2	0.559774	0.545346	0.923829	0.500974	1.38696	0.968366	0.19474	0.390396
Cre02.g086800.t1.1	0.180345	0.702788	1.48818	1.69472	1.83526	1.8719	2.11749	2.12247
Cre02.g086850.t1.2	15.4654	17.1729	18.7538	19.4963	19.8658	16.2538	29.9385	28.8492
Cre02.g086900.t1.1	5.3763	5.48714	6.22037	6.12901	4.3044	4.65029	7.29218	6.86297
Cre02.g086950.t1.1	6.81273	7.39566	5.35403	5.86484	7.34914	7.07131	6.99739	6.05227
Cre02.g087000.t1.2	0.200651	0.0781916	0.036794	0.215489	0.745735	1.00662	0.593338	0.629718
Cre02.g087050.t1.2	2.1521	2.29631	0.845654	1.46746	2.44851	1.77284	2.05	1.16142
Cre02.g087100.t1.1	8.4235	10.0505	3.73145	5.42108	9.04526	10.8062	3.70423	2.22776
Cre02.g087150.t1.1	26.2858	23.0894	45.7516	43.8099	19.4472	20.3508	9.14458	11.946
Cre02.g087200.t1.2	3.91752	3.31027	3.59184	3.29136	3.28974	3.49223	1.59928	1.95153
Cre02.g087250.t1.1	46.9832	49.5866	74.0179	76.7543	71.1073	73.8593	105.561	105.81
Cre02.g087300.t1.2	4.01552	4.82483	5.64528	6.5885	7.34357	5.44146	9.5459	10.3852
Cre02.g087324.t1.2	2.05947	1.75559	1.4162	3.2255	2.73364	3.34006	2.68676	4.48847
Cre02.g087350.t1.2	4.18469	3.56723	8.55288	6.78803	4.55165	3.84582	8.79553	8.81623
Cre02.g087400.t1.1	0	0.23731	0	0	0.107776	0.210695	0	0
Cre02.g087450.t1.1	21.5487	24.951	15.3848	12.646	13.2854	14.2083	7.68092	7.08307
Cre02.g087500.t1.1	0	0.220801	0	0.405671	0.200556	0.980185	0.197117	0.592741
Cre02.g087550.t1.2	8.45107	9.66098	24.2309	26.3187	8.55905	7.77465	20.9032	21.3783
Cre02.g087600.t1.2	6.34708	6.18349	4.67463	5.58726	8.42481	8.50498	7.33013	7.93698
Cre02.g087629.t1.1	0.272681	0.265652	0.125006	0.244038	0.120648	0.117929	0.355736	0.475431
Cre02.g087700.t1.1	48.9831	50.4133	34.9151	37.5164	78.5377	80.7526	60.3638	57.2931
Cre02.g087750.t1.1	0.197455	0.512975	0.120693	0.0589047	0.349456	0.398513	0.228976	0
Cre02.g087800.t1.2	0.700836	0.379318	0.142794	0.209073	1.37816	1.14504	0.270904	0.271542
Cre02.g087850.t1.2	0.216934	1.12716	0.3978	0.517725	1.59971	1.8764	0.125782	0.126078
Cre02.g087900.t1.2	0.516352	0.223575	0.315618	0.051346	0.152307	0.1985	0.149695	0
Cre02.g087950.t1.1	20.1465	19.5545	13.4774	14.6245	24.4965	21.3629	22.9082	23.4175
Cre02.g088000.t1.1	173.503	169.412	209.116	193.441	112.164	124.864	160.427	147.333
Cre02.g088050.t1.1	1.62811	1.45397	1.49277	0.971397	1.08054	1.40826	0.472005	0.354836
Cre02.g088100.t1.1	1.97548	2.64628	1.92446	1.43648	5.13507	3.95141	1.82551	1.39926
Cre02.g088127.t1.1	31.7248	30.9071	27.73	32.178	13.4752	9.14691	9.01333	6.63762
Cre02.g088200.t1.1	705.046	698.123	916.268	907.026	668.685	651.191	894.499	893.311
Cre02.g088250.t1.1	0.869904	0.762734	0.398794	0.467117	0.923735	0.902922	0.605263	1.21337
Cre02.g088300.t1.2	5.56777	5.27359	4.25409	3.87561	3.42148	2.94306	1.34512	1.8876
Cre02.g088350.t1.2	1.47696	1.59877	1.30402	1.27286	1.69421	1.18288	1.47485	1.38295
Cre02.g088400.t1.1	77.4121	81.113	119.438	111.979	43.9779	46.7294	81.9725	81.7576
Cre02.g088450.t1.2	1.49624	1.26069	2.26171	1.55622	1.32402	1.71393	2.00473	2.07996
Cre02.g088500.t1.2	3.06226	3.10267	2.58307	2.3021	2.38462	2.64874	1.70453	1.06784
Cre02.g088550.t1.1	1.39831	0.817361	1.28207	0.625715	5.44441	4.59605	2.31068	1.58471
Cre02.g088600.t1.1	29.6743	30.1911	30.357	35.257	37.7066	36.7305	41.1918	36.8923
Cre02.g088650.t1.1	0.583744	0.663481	0.624419	0.609498	1.46358	1.93552	1.0154	1.1026
Cre02.g088651.t1.1	5.09568	4.78491	3.60256	3.6813	9.28998	10.1958	7.04823	5.83382
Cre02.g088700.t1.1	1.67522	1.92878	1.11706	1.49925	3.3691	2.76628	1.05962	1.32764
Cre02.g088750.t1.1	1.84238	1.7773	1.40769	1.40638	2.1418	2.04668	1.1625	0.881802
Cre02.g088800.t1.1	8.38625	8.89957	4.94298	6.83523	9.6738	8.93771	5.4703	5.74428
Cre02.g088850.t1.1	83.8383	85.5784	80.3105	81.3031	71.974	73.8158	60.0744	64.361
Cre02.g088900.t1.1	116.596	120.66	91.0262	99.035	154.107	153.202	175.274	166.485
Cre02.g088950.t1.1	3.79093	5.80364	4.96541	4.36208	5.591	6.40189	3.61108	4.40644
Cre02.g089000.t1.2	0	0	0	0	2.40863	1.56957	0	0
Cre02.g089050.t1.2	0.689322	0.895406	0.842689	0.822552	3.10074	2.03714	1.64868	1.85287
Cre02.g089100.t1.1	148.425	147.618	155.84	156.654	80.2504	79.4166	110.473	117.116
Cre02.g089150.t1.2	6.87881	7.36222	4.61918	4.59551	4.8868	5.69851	4.29742	3.37845
Cre02.g089200.t1.1	2.6139	3.10358	1.49787	2.12002	3.32499	2.04896	0.994601	1.13936
Cre02.g089250.t1.2	52.5444	52.4627	64.9448	61.7041	22.863	24.4822	38.3772	36.696
Cre02.g089300.t1.1	0	0	0	0	1.20825	0	0	0
Cre02.g089350.t1.2	2.50385	2.43932	2.59678	2.31432	3.59591	3.12434	1.96347	2.29014
Cre02.g089400.t1.2	0	0	0.15544	0	0.15002	0	0	0
Cre02.g089450.t1.1	13.2996	12.7744	10.4765	10.7291	17.2389	21.5492	16.7804	16.3299
Cre02.g089500.t1.1	0	0	0	0	0	0	0.251564	0.252156
Cre02.g089550.t1.1	0	0.509604	0.1199	0	0	0.113113	0.454941	0.342009
Cre02.g089600.t1.2	2.00391	2.19629	0	0.672531	4.21149	4.76659	1.525	1.52858
Cre02.g089608.t1.1	0.0654934	0.0638053	0	0.175842	0.289776	0.0566493	0.0569613	0
Cre02.g089650.t1.2	0.051938	0.252996	0.0476203	0.185929	0.04596	0	0.0903436	0.135834
Cre02.g089700.t1.1	0.0579574	0.0564636	0.0531393	0	0.461579	0.050131	0.151221	0.151577
Cre02.g089750.t1.1	0.0941502	0.183447	0.129485	0.168521	0.249941	0.162873	0.122827	0.32831
Cre02.g089800.t1.2	0.37028	0.180368	0.678996	0.579925	1.96597	1.0409	0.885616	0.8877
Cre02.g089850.t1.1	6.31172	7.45948	2.65633	4.25969	3.57089	4.11692	2.24978	2.79629
Cre02.g089900.t1.1	107.434	108.332	203.476	196.227	61.7596	59.8254	132.586	133.308
Cre02.g089950.t1.1	42.5552	46.8426	22.5491	17.5587	41.5696	45.1743	44.4617	36.8576
Cre02.g090000.t1.2	0.7931	0.70827	0.181792	0.38447	0.848026	0.800335	0.316149	0.288084
Cre02.g090050.t1.2	6.20006	5.29454	4.91265	4.93226	7.17978	10.3284	19.9717	18.7508
Cre02.g090100.t1.1	7.53706	8.77942	6.61003	8.06509	5.50962	4.96031	2.70757	2.14258
Cre02.g090150.t1.1	0	0	0	0	1.16129	0.567561	1.42672	0.572029
Cre02.g090200.t1.2	1.34997	1.75356	1.65032	2.41633	1.19459	1.55689	1.1741	0.392288
Cre02.g090250.t1.2	0.473713	0.230752	0.651498	0	1.04797	1.84385	1.236	1.85836
Cre02.g090300.t1.1	2.626	2.19284	5.67528	6.71474	3.98357	5.02951	6.52542	8.66653
Cre02.g090350.t1.2	0	0	0	0	0.21895	0.0535042	0.0537989	0
Cre02.g090400.t1.1	0.377175	0.734906	0.345819	0.168778	1.33505	1.63121	0.492058	0.822025
Cre02.g090450.t1.2	0.939006	0.831639	0.782677	1.22236	0.755388	1.03371	1.03941	1.19069
Cre02.g090500.t1.2	1.2833	1.44762	1.3624	0.785815	2.51026	1.81106	2.11475	2.35525
Cre02.g090550.t1.2	1.28918	1.33445	1.18201	1.51431	1.99639	1.46356	0.490539	0.561935
Cre02.g090600.t1.1	1.97226	1.18241	2.2256	2.03664	3.759	2.62451	1.18753	0.925808
Cre02.g090650.t1.2	18.0414	20.6013	18.3577	22.5664	10.659	9.30748	15.3651	15.4479
Cre02.g090689.t1.1	0.466377	0.227178	0.320704	0.104347	0.309523	0.201699	0	0
Cre02.g090700.t1.2	0.0735331	0.107457	0.10113	0	0.162674	0.159008	0.0639536	0.0641041
Cre02.g090750.t1.1	0.729888	0.62219	0.752862	0.653219	2.01837	2.20964	1.03155	0.795369
Cre02.g090800.t1.1	4.1709	4.41673	2.49402	2.59672	7.06072	8.15647	1.57719	1.10663
Cre02.g090850.t1.2	50.6176	51.8143	26.7023	26.8521	26.2258	28.3633	21.6927	23.5983
Cre02.g090900.t1.2	0.188587	0.367453	0.172909	0.506333	1.00129	0.978725	0.984115	0.98643
Cre02.g090950.t1.2	0.0731853	0.0237663	0.223671	0.349322	0.0215872	0.0211009	0.0212171	0
Cre02.g091000.t1.1	3.57941	3.36035	1.37241	1.63084	1.55492	1.51988	1.47165	1.58858
Cre02.g091050.t1.1	161.587	166.519	135.094	138.24	199.567	201.779	200.412	205.988
Cre02.g091100.t1.1	1670.24	1671.36	1543.58	1524.69	2359.54	2370.66	2241.69	2276.39
Cre02.g091150.t1.2	9.28243	9.65976	10.3805	11.2653	14.9968	12.895	15.6571	15.2035
Cre02.g091193.t1.1	11.9804	11.1852	7.78062	11.1687	5.30072	5.61305	4.77566	3.04621
Cre02.g091200.t1.2	5.71371	5.0312	4.43276	6.78526	5.44499	4.75206	7.93186	7.66316
Cre02.g091250.t1.1	26.6937	24.875	56.398	52.973	25.6753	23.0891	37.3479	43.5064
Cre02.g091300.t1.2	0	0	0	0	9.85933	19.2744	48.4513	19.4261
Cre02.g091350.t1.2	12.9126	18.4204	21.1413	21.8743	8.56978	9.57336	19.2522	24.5238
Cre02.g091400.t1.2	2.33579	2.02275	1.96315	2.43884	1.8947	1.73977	3.04725	2.26253
Cre02.g091450.t1.2	2.97113	2.79117	2.0431	3.13387	2.06576	2.29457	1.66119	1.85011
Cre02.g091500.t1.2	0.092701	0.0225779	0.0424973	0.0829635	0.102539	0.100229	0.0604683	0.141425
Cre02.g091550.t1.1	43.6461	42.9271	35.6243	37.6631	21.0165	19.2816	20.2031	18.7069
Cre02.g091600.t1.2	0	0	0.62595	0.610992	0	0	1.18753	0.595162
Cre02.g091650.t1.2	1.08848	0.848344	1.0978	0.681904	0.674241	1.22395	1.32536	1.51826
Cre02.g091700.t1.1	56.6564	62.221	36.5514	31.4372	48.1299	43.125	64.7749	63.0414
Cre02.g091750.t1.1	19.695	18.8988	18.0577	14.1805	13.1038	13.449	7.3411	8.77841
Cre02.g091800.t1.1	0	2.48199	1.55724	0.760015	6.01179	5.14179	3.69293	4.44194
Cre02.g091850.t1.1	12.6451	13.8591	12.238	16.1894	19.1157	18.9888	18.7878	21.4349
Cre02.g091900.t1.2	3.72294	2.57186	1.55156	1.02985	3.41423	2.75181	3.00245	3.00951
Cre02.g091950.t1.2	3.44463	3.21794	2.24973	1.47806	6.34685	5.2651	2.17509	1.68658
Cre02.g092000.t1.2	0.393145	0.670271	0.81104	0.791659	0.347894	0.765126	0.427411	0.599782
Cre02.g092050.t1.2	8.49413	6.86997	4.11441	5.30698	5.95644	5.54498	2.78776	4.47091
Cre02.g092079.t1.1	0.0519864	0.101293	0	0	0	0.0899326	0.045214	0.0453203
Cre02.g092100.t1.1	9.66802	11.2008	4.31236	6.31397	6.70545	4.97228	1.81806	1.59454
Cre02.g092150.t1.1	4.74711	5.71293	7.4248	7.12242	8.27788	9.4198	7.40734	6.81618
Cre02.g092200.t1.1	1.76933	1.96997	1.85399	2.26211	2.53491	2.11342	1.09917	1.1752
Cre02.g092250.t1.1	10.2036	8.75367	10.7517	12.1303	9.02918	7.77192	3.84113	4.64676
Cre02.g092300.t1.2	17.1186	15.4861	11.6595	13.5695	14.7154	13.9608	7.01884	6.18258
Cre02.g092325.t1.1	5.14234	2.5049	3.14323	5.11353	3.53925	3.4595	5.21783	3.23768
Cre02.g092334.t1.1	0	0	0	0	1.30934	1.27984	0	1.28991
Cre02.g092350.t1.1	26.6881	28.764	55.3933	55.5742	49.7429	48.2586	116.605	108.818
Cre02.g092400.t1.2	1.04388	0.677986	0.797587	1.08994	3.54098	3.76217	2.11842	2.42675
Cre02.g092450.t1.2	58.8472	58.7801	48.3735	47.7019	69.6713	66.9314	55.4166	60.6181
Cre02.g092500.t1.2	3.3854	3.11491	2.7016	2.58094	3.60599	3.90433	2.72627	2.35011
Cre02.g092550.t1.1	4.01965	4.18304	5.86327	5.80492	8.97332	7.34879	7.15089	6.61023
Cre02.g092600.t1.1	42.4782	41.9105	44.4044	51.6972	27.0545	26.2109	22.7079	24.0586
Cre02.g092650.t1.2	0.703392	1.71316	0.967376	0.314754	0.933649	1.52102	0.305879	0.613198
Cre02.g092700.t1.1	9.664	6.91221	9.64573	8.21096	9.95892	11.1101	18.5123	16.743
Cre02.g092750.t1.2	0.252342	0.204865	0.231364	0.150557	0.409379	0.727554	0.219468	0.18332
Cre02.g092800.t1.1	10.0065	9.2168	7.33968	5.21039	9.4987	6.7668	6.17113	7.13728
Cre02.g092850.t1.1	6.29362	9.29599	3.72285	2.36203	12.935	10.7119	8.65201	12.0351
Cre02.g092900.t1.1	31.8051	32.5588	30.0724	30.4657	27.3748	27.1879	10.9134	12.672
Cre02.g092950.t1.1	2.44643	2.15638	3.41798	4.3789	4.43278	4.93749	5.16732	3.96078
Cre02.g092972.t1.1	0	7.33416	6.90236	6.73742	9.99256	3.25581	0	16.4072
Cre02.g093050.t1.1	23.7058	28.8685	18.1126	7.07191	0	0	0	0
Cre02.g093300.t1.2	11.3573	13.4088	12.3546	12.6624	16.5231	15.1517	12.4728	11.8309
Cre02.g093350.t1.2	2.95991	2.42831	1.28551	1.95189	4.13563	3.50345	1.62588	2.44456
Cre02.g093400.t1.2	0.478871	0.311019	0.439061	0.285713	0.282502	0.414206	0.555315	0.417466
Cre02.g093450.t1.1	29.209	23.9196	10.9969	13.2598	11.987	11.4728	4.6635	5.90459
Cre02.g093500.t1.1	0	0	0.327336	0.511222	0	0	0	0
Cre02.g093550.t1.2	3.03308	2.4675	2.26489	1.84697	2.35194	2.40713	2.55636	2.12623
Cre02.g093589.t1.1	0.793571	1.54623	12.3692	11.3634	3.51116	5.49127	22.7762	29.0561
Cre02.g093600.t1.1	5.12432	5.46769	29.8679	27.9531	12.5239	10.2366	63.6679	67.8595
Cre02.g093650.t1.1	177.005	190.489	177.702	185.429	210.057	206.808	122.918	137.861
Cre02.g093700.t1.2	1.23797	1.20606	1.28984	1.71226	2.29055	2.77434	1.46822	1.37356
Cre02.g093750.t1.1	102.71	104.593	261.007	283.33	90.8884	86.2813	414.666	419.879
Cre02.g093800.t1.1	8.34517	8.31075	27.3751	24.5633	10.8308	10.1056	29.5159	35.2438
Cre02.g093850.t1.2	1.13143	1.58451	0.907698	0.791079	1.53309	1.31505	1.26079	1.07882
Cre02.g093900.t1.1	0	0	0	0.338932	0	0	0	0
Cre02.g093950.t1.1	1.05991	1.13585	1.94359	1.70743	5.43989	4.40054	7.00589	4.89718
Cre02.g094000.t1.2	0	0	0	0	0	0.367831	0.369857	0
Cre02.g094004.t1.1	6.20507	4.8778	4.11978	5.66817	2.76437	3.18328	2.45643	2.27568
Cre02.g094050.t1.2	1.60544	1.56406	2.49103	3.48148	1.03817	1.01478	1.77221	1.34574
Cre02.g094100.t1.1	44.9013	46.2057	42.7725	37.9233	34.229	36.4841	40.9114	36.6019
Cre02.g094150.t1.1	1.5636	1.84971	1.33121	0.949561	3.21199	2.5117	4.32254	4.08929
Cre02.g094200.t1.2	0.596879	0.290747	0.456049	0.623212	0.528178	1.97906	0.951721	0.520342
Cre02.g094250.t1.1	296.993	300.123	195.745	197.295	299.101	298.198	188.34	198.25
Cre02.g094300.t1.1	15.0979	14.8334	9.61955	9.50419	10.9825	12.7271	8.56855	11.0426
Cre02.g094350.t1.2	10.1483	10.407	6.12146	5.33783	5.43539	7.39189	7.35518	6.90685
Cre02.g094400.t1.1	0.465014	0	0.532945	0.52021	1.02873	1.00555	0.606652	1.41885
Cre02.g094450.t1.1	1.89485	2.52972	2.1234	2.82636	2.04937	2.00319	1.77008	1.52952
Cre02.g094500.t1.1	8.76316	9.55364	5.73904	7.84267	11.6318	12.2721	8.89181	8.36705
Cre02.g094550.t1.2	0	0	0.0778858	0	0	0	0.0738812	0.074055
Cre02.g094600.t1.2	1.00663	0.790872	0.803854	0.784645	2.15508	1.40435	1.12966	1.33048
Cre02.g094650.t1.1	1.01617	1.42997	0.931693	0.707334	0.699385	0.585966	0.294596	0.295289
Cre02.g094700.t1.1	1.28125	0.915364	2.03621	1.60533	4.30835	4.65457	6.98316	6.7762
Cre02.g094750.t1.1	7.29392	7.82682	4.84606	3.40579	7.76399	8.7777	7.17115	7.92526
Cre02.g094800.t1.2	0.155524	0.121212	0.028519	0	0.110099	0.107618	0.0270526	0.0271163
Cre02.g094850.t1.2	0.256722	0.375157	0.176535	0.459511	1.30625	0.610651	0.502375	0.335705
Cre02.g094900.t1.2	0.774808	0.712902	1.06559	0.693421	1.71407	1.93607	0.861056	0.825557
Cre02.g094950.t1.1	2.49815	3.65064	2.29047	3.35361	2.21061	2.1608	1.08635	1.08891
Cre02.g095000.t1.1	13.6944	9.33897	15.3182	10.7852	15.2689	14.9248	10.2429	7.87932
Cre02.g095050.t1.2	1.00076	0.649973	0.994023	0.671725	1.47595	1.80337	0.725318	0.87243
Cre02.g095100.t1.2	10.934	13.3152	14.2857	13.6997	11.3687	9.93036	11.4115	14.5362
Cre02.g095150.t1.1	5.9607	5.86513	3.82562	3.7342	6.11857	6.9603	2.28104	1.55891
Cre02.g095200.t1.1	29.9325	28.6611	25.0134	24.7218	19.6006	18.8631	25.7355	26.3925
Cre02.g095250.t1.2	0	0.0828592	0	0	0.175612	0.196177	0.197257	0.123576
Cre02.g095294.t1.1	2.19903	2.85646	1.68018	2.62405	9.40528	7.29129	6.69393	5.11213
Cre02.g095300.t1.2	0	0.0842614	0.0396503	0	0.191339	0.299245	0.639397	0.754002
Cre02.g095350.t1.2	21.6354	23.9133	14.4995	13.6321	12.5345	12.4199	5.82225	7.18921
Cre02.g095400.t1.1	1.74685	2.47538	0.728014	1.13699	4.35632	5.35704	2.07175	2.07662
Cre02.g095450.t1.1	12.1374	6.21291	5.09266	5.7074	5.82531	6.76169	3.93622	5.55954
Cre02.g095500.t1.2	0.443965	0.432521	0.569879	0.556262	1.49289	1.99687	1.31283	0.696664
Cre02.g095550.t1.2	0.548461	0.364312	0.297148	0.223113	0.330909	0.409708	0.0433646	0.152133
Cre02.g095600.t1.1	0.862363	1.57526	0.691839	0.578835	2.95704	2.33098	0.75002	0.93973
Cre02.g095650.t1.2	1.51827	2.16181	0.749565	1.14974	2.37699	2.52547	0.914175	0.814512
Cre02.g095700.t1.1	0	0	0.153018	0	0	0	0.145151	0
Cre02.g095750.t1.1	0.293513	0.0953158	0.627928	0.175121	0.865765	0.846258	0.510551	0.085292
Cre02.g095800.t1.1	10.2511	7.62439	6.67019	4.83378	7.51057	7.72271	3.73882	4.42026
Cre02.g095850.t1.2	1.79996	1.4613	0.412581	0.939684	3.7165	2.33534	1.1741	1.0461
Cre02.g095900.t1.1	6.98759	6.23586	8.26512	8.1631	10.101	10.5193	9.41747	10.3231
Cre02.g095950.t1.2	0.0846465	0.0549765	0	0.101007	0.0998717	0.0976214	0.147238	0.0737924
Cre02.g096000.t1.2	3.59875	3.30565	1.97975	2.2085	2.36566	3.3796	3.57706	2.86838
Cre02.g096050.t1.2	1.28658	0.877389	0.471847	0.921145	0.683094	0.556419	0.33569	0.67296
Cre02.g096100.t1.1	2.42475	2.06697	2.7095	3.05164	2.61503	3.27706	3.95413	4.02949
[truncated: 14,477 more rows]

## Sheet: HiExpressionCounts
gene name	full gene name	phytozome	Genename	Defline	Description	KNSW4ARBMTS1	KNSW4ARBMTS2	KNSW4ARBPTS1	KNSW4ARBPTS2	KNSWs1RBMTS1	KNSWs1RBMTS2	KNSWs1RBPTS1	KNSWs1RBPTS2
Cre01.g002300	Cre01.g002300.t1.1	19865676	CYN19-2	peptidyl-prolyl cis-trans isomerase, cyclophilin-type	Peptidyl-prolyl cis-trans isomerase (rotamase), cyclophilin type [PMID: 15051864, PMID:15047905]; identical to AF052206 CYP1 [PMID: 10527429]; cytosolic; similar to At4g38740 (ROC1, AtCYP18-3) and At2g21130 (AtCYP19-2); found in the flagellar proteome [PMID: 15998802]	672.041	679.025	819.151	805.794	847.88	861.828	830.044	819.883
Cre01.g007051	Cre01.g007051.t1.1	19866410	RPL40	Ribosomal protein L40, component of cytosolic 80S ribosome and 60S large subunit	Cytosolic 80S ribosomal protein L40; cytosolic 60S large ribosomal subunit protein L40; a ubiquitin-fusion protein: contains an N-terminal ubiquitin domain	5117.81	5048.57	5626.22	5800.12	3590.84	3512.83	3852.26	3887.17
Cre01.g010900	Cre01.g010900.t1.1	19866296	GAP3	Glyceraldehyde-3-Phosphate Dehydrogenase	Glyceraldehyde 3-phosphate dehydrogenase A, chloroplast precursor (NADP-dependent glyceraldehyde phosphate dehydrogenase subunit A); corresponds to G3PA_CHLRE; found in the flagellar proteome [PMID: 15998802]	1889.57	1901.13	1843.54	1837.36	2916.6	2912.56	3085.05	3053.99
Cre01.g011000	Cre01.g011000.t1.1	19865234	RPL6	Ribosomal protein L6, component of cytosolic 80S ribosome and 60S large subunit	Cytosolic 80S ribosomal protein L6; Cytosolic 60S large ribosomal subunit protein L6	2935.93	2955.13	3024.64	2997.93	2679.7	2731.45	2712.39	2649.04
Cre01.g017700	Cre01.g017700.t1.2	19866167				9192.94	9110.59	3448.65	3477.1	1055.55	1017.29	680.181	662.519
Cre01.g018800	Cre01.g018800.t1.1	19866026	ATP6	F1F0 ATP synthase subunit 6	subunit 6 of the mitochondrial F1F0-ATP synthase; [= yeast and bovine ATPA subunit]; part of the F0 sector	987.814	1010.2	984.658	964.947	484.193	482.557	473.382	486.457
Cre01.g027000	Cre01.g027000.t1.1	19865922	RPL11	Ribosomal protein L11, component of cytosolic 80S ribosome and 60S large subunit	Cytosolic 80S ribosomal protein L11; Cytosolic 60S large ribosomal subunit protein L11	3417.41	3448.21	3758.16	3848.13	2449.76	2484.69	2124.48	2134.66
Cre01.g032300	Cre01.g032300.t1.1	19865449	GBP1	G-strand telomere binding protein 1	[PMID: 8062839]	646.063	638.233	545.067	541.908	639.463	636.463	484.341	464.201
Cre01.g033550	Cre01.g033550.t1.1	19865819	PDI2	protein disulfide isomerase	Protein Disulfide Isomerase 2 (CrPDI2), PDI-D subfamily, PMID: 16143836, circadian expressed, possible targeting to the ER.	635.255	622.099	748.396	732.089	382.098	379.583	513.813	513.102
Cre01.g038400	Cre01.g038400.t1.1	19865127	CRT2	Calreticulin 2, calcium-binding protein	Calreticulin 2. Calreticulin (CRT) is a high-capacity calcium-binding protein mainly localized to the endoplasmic reticulum in eukaryotic cells. Higher plants contain two distinct groups of CRTs: a CRT1/CRT2 group and a CRT3 group. Similar to Arabidopsis At1g09210.1	612.599	593.532	752.538	765.92	704.468	691.869	977.926	975.827
Cre01.g039250	Cre01.g039250.t1.2	19865589	RPS2	Ribosomal protein S2, component of cytosolic 80S ribosome and 40S small subunit	Cytosolic 80S ribosomal protein S2; Cytosolic 40S small ribosomal subunit protein S2	1602.45	1572.1	1787.71	1819.34	2501.71	2501.78	2339.82	2345.57
Cre01.g039300	Cre01.g039300.t1.1	19865865	RB47	polyadenylate-binding protein RB47	almost identical to T07933, polyadenylate-binding protein RB47 precursor, chloroplast-targeted [PMID: 9482869]; regulates translation of psbA; possibly controlled by RB60, a protein disulfide isomerase whose Volvox homolog is controlled by regA (regulator of somatic development)	604.25	604.776	552.539	546.731	638.681	631.874	659.894	658.987
Cre01.g040000	Cre01.g040000.t1.1	19865600	RPL26	Ribosomal protein L26, component of cytosolic 80S ribosome and 60S large subunit	Cytosolic 80S ribosomal protein L26; Cytosolic 60S large ribosomal subunit protein L26	1242.64	1219.84	1353.74	1384.44	1858.97	1854.72	1651.26	1634.5
Cre01.g042200	Cre01.g042200.t1.1	19865115				725.769	694.631	1155.09	1142.53	541.988	520.623	928.694	946.344
Cre01.g047750	Cre01.g047750.t1.1	19864902	RPL18a	Ribosomal protein L18a, component of cytosolic 80S ribosome and 60S large subunit	Cytosolic 80S ribosomal protein L18a; Cytosolic 60S large ribosomal subunit protein L18a	2786.56	2760.64	2876.13	2901.29	3914.69	3999.24	4449.42	4414.89
Cre01.g048150	Cre01.g048150.t1.1	19864957	HLA8	High light-induced nuclease	Staphylococcal nuclease homolog. Thermonuclease family. Induced under high light condition [PMID: 12000678]. A part of post-transcriptional gene silencing machinery [PMID: 11782532]	541.789	553.491	665.644	664.759	416.634	401.733	698.681	725.145
Cre01.g051500	Cre01.g051500.t1.1	19865437	ULP1	uncharacterized lumenal polypeptide	Present in thylakoid proteome based on mass spectrometric peptide identification [PMID: 17078018]; described as reduced in the non-photosynthetic mutant cen [PMID: 8879236]; similarity to PSBQ is limited to transit peptide	564.737	541.624	511.814	528.24	1042.35	1025.97	771.622	777.143
Cre01.g062700	Cre01.g062700.t1.1	19866313				1791.96	1587.48	851.291	785.247	221.835	176.682	141.316	141.649
Cre02.g075700	Cre02.g075700.t1.1	19868797	RPL19	Ribosomal protein L19, component of cytosolic 80S ribosome and 60S large subunit	Cytosolic 80S ribosomal protein L19; Cytosolic 60S large ribosomal subunit protein L19	2234.4	2250.05	2316.18	2281.46	3269.28	3276.59	2932.13	3030.18
Cre02.g079800	Cre02.g079800.t1.1	19868289	ASA6	mitochondrial F1F0 ATP synthase associated 13.3 kDa protein	Mitochondrial ATP synthase associated protein 6; unknown evolutionary origin [PMID: 11744727, PMID: 15710684]	1332.21	1318.55	1140.33	1167.94	590.928	597.176	545.767	562.271
Cre02.g080200	Cre02.g080200.t1.1	19868419	TRK1	Transketolase	Transketolase (EC 2.2.1.1), possible plastid precursor, based on predicted organelle targeting sequence and similarity to potato transketolase plastid precursor (GenBank CAA90427)	292.309	295.845	287.999	279.215	603.332	609.316	636.375	624.583
Cre02.g080700	Cre02.g080700.t1.1	19868312	BIP1	Binding protein 1	BIP1 is one of 9 genes encoding HSP70-like proteins in Chlamydomonas; BIP1 contains an ER retention motif, an ER-targeting sequence and is most similar to ER-HSP70s from other organisms; it forms a cluster with ER-targeted chaperones HSP90B and BIP2 [PMID: 16143837]	1337.25	1330.49	2088.96	2037.96	464.409	472.264	929.029	940.007
Cre02.g082500	Cre02.g082500.t1.2	19869277	PSAN	photosystem I reaction center subunit N	_	604.775	615.848	586.795	596.295	1237.45	1284.1	994.476	1021.85
Cre02.g082750	Cre02.g082750.t1.1	19869537	PSBX	4.1 kDa photosystem II subunit	Encoding a 4.1 kDa subunit for PS2 with a single TMH [PMID: 16143838].	5585.04	5604.23	5049.81	5079.02	5887.01	5814.17	5574.61	5624.28
Cre02.g088200	Cre02.g088200.t1.1	19868407	RB60	protein disulfide isomerase 1	Protein disulfide isomerase 1 (CrPDI1 [PMID: 16143836]. Located in the chloroplast and the endoplasmic reticulum. The Rb60 protein is part of a complex involved in the control of psbA mRNA translation by light [PMID: 1721866, PMID: 7798310, PMID: 8668172, PMID: 7992056, PMID: 9482869, PMID: 9395399, PMID: 10648596, PMID: 11087734, PMID: 11593046, PMID: 11976967, PMID: 12407204, PMID: 15837918, PM…	705.046	698.123	916.268	907.026	668.685	651.191	894.499	893.311
Cre02.g091100	Cre02.g091100.t1.1	19869475	RPL15	Ribosomal protein L15, component of cytosolic 80S ribosome and 60S large subunit	Cytosolic 80S ribosomal protein L15; Cytosolic 60S large subunit ribosomal protein L15	1670.24	1671.36	1543.58	1524.69	2359.54	2370.66	2241.69	2276.39
Cre02.g096150	Cre02.g096150.t1.1	19869079	MSD1	superoxide dismutase [Mn]	Superoxide dismutase [Mn], mitochondrial precursor; the name MSD1 replaces the previous designation SodA.	819.856	841.715	849.094	828.983	538.906	547.489	514.903	539.614
Cre02.g097400	Cre02.g097400.t1.1	19869557	EIF5A	eukaryotic initiation factor	putative eukaryotic initiation factor 5A-3 (eIF-5A); Found in the flagellar proteome [PMID: 15998802]	1189.85	1206.28	1327.06	1356.21	1535.47	1536.63	1550.79	1550.9
Cre02.g097800	Cre02.g097800.t1.2	19868537				1060.73	1066.15	646.499	651.286	485.785	475.034	253.646	255.951
Cre02.g101350	Cre02.g101350.t1.1	19869759	RPL10a	Ribosomal protein L10a, component of cytosolic 80S ribosome and 60S large subunit	Cytosolic 80S ribosomal protein L10a; Cytosolic 60S large ribosomal subunit protein L10a	2525.18	2532.73	2744.46	2716.09	2798.38	2733.17	2545.26	2572.99
Cre02.g102250	Cre02.g102250.t1.1	19869686	RPS3	Ribosomal protein S3, component of cytosolic 80S ribosome and 40S small subunit	Cytosolic 80S ribosomal protein S3; Cytosolic 40S small ribosomal subunit protein S3	989.365	1059.81	1074.89	1079.17	1707.55	1743.86	1541.45	1546.49
Cre02.g106600	Cre02.g106600.t1.1	19869704	RPS19	Ribosomal protein S19, component of cytosolic 80S ribosome and 40S small subunit	Cytosolic 80S ribosomal protein S19; Cytosolic 40S small ribosomal subunit protein S19	1257.57	1292.18	1324.31	1307.44	3103.9	3045.34	2907.34	2896.06
Cre02.g114600	Cre02.g114600.t1.1	19869301	PRX2	2-cys peroxiredoxin	2-cys Peroxiredoxin, thioredoxin dependent peroxidase, probably cytosolic, more closely related to mammalian peroxiredoxins than to plant peroxiredoxins. Found in the flagellar proteome [PMID: 15998802].	492.224	497.592	617.1	587.025	1206.33	1231.36	1123.37	1081.7
Cre02.g115200	Cre02.g115200.t1.1	19869333	RPL27a	Ribosomal protein L27a, component of cytosolic 80S ribosome and 60S large subunit	Cytosolic 80S ribosomal protein L27a; Cytosolic 60S large ribosomal subunit protein L27a	1531.12	1556.13	1759.16	1731.83	3455.36	3446.34	3262.18	3203.5
Cre02.g116750	Cre02.g116750.t1.2	19868945	ATP1A	mitochondrial F1F0 ATP synthase, alpha subunit	alpha subunit of the mitochondrial ATP synthase [= human ATP5A1, yeast ATP1]; part of the F1 sector; isoform of ATP1B	1544.26	1527.65	1595.37	1613.65	800.953	800.279	776.496	805.746
Cre02.g118550	Cre02.g118550.t1.1	19868411				861.577	892.952	476.411	487.852	331.653	332.813	94.1251	97.2465
Cre02.g118850	Cre02.g118850.t1.1	19869230	_	Acyl-CoA-binding protein	Acyl-CoA-binding protein homolog (ACBP)	716.322	737.684	615.806	629.168	437.445	432.933	374.96	380.815
Cre02.g119550	Cre02.g119550.t1.1	19869039	NIP1	NaCl-inducible protein	Present in thylakoid-enriched fraction based on mass spectrometric peptide identification [PMID: 17078018] but TargetP predicts mitochondrial localization; Volvox homolog NipA is NaCl-inducible [PMID: 17184518]	4568.32	4552	4411.38	4462.69	1279.24	1275.21	1466.01	1469.46
Cre02.g120100	Cre02.g120100.t1.1	19868965	RBCS1	ribulose-1,5-bisphosphate carboxylase/oxygenase small subunit 1, chloroplast precursor	ribulose bisphosphate carboxylase/oxygenase small subunit 1 [PMID: 3820291; PMID: 521455; PMID: 11641402]	1483.92	1528.97	1394.35	1363.75	593.51	573.892	560.858	544.62
Cre02.g120150	Cre02.g120150.t1.1	19868911	RBCS2A	ribulose-1,5-bisphosphate carboxylase/oxygenase small subunit 2	RuBisCO small subunit 2, chloroplast precursor [PMID: 3820291]; almost identical to SwissProt P08475 and to RBCS2B on same scaffold, but has a gap nearby. RBCS2 is the only isoform present in the crystallized complex [PMID: 11866526]	8987.95	9145.51	8881.81	8801.77	6474.54	6535.52	6227.7	6302.44
Cre02.g126450	Cre02.g126450.t1.1	19868832	RPL24	Ribosomal protein L24, component of cytosolic 80S ribosome and 60S large subunit	Cytosolic 80S ribosomal protein L24; Cytosolic 60S large ribosomal subunit protein L24	7411.15	7391.52	7546.18	7510.19	4326.43	4487.78	4068.48	4103.99
Cre02.g129300	Cre02.g129300.t1.1	19868510	VIG1	Vasa intronic gene	Vasa intronic gene (Drosophila) homolog; putative RNA induced silencing complex (RISC) associated factor	275.655	272.465	276.343	275.135	734.227	727.785	705.471	702.532
Cre02.g132800	Cre02.g132800.t1.1	19868722	PSBO	Oxygen-evolving enhancer protein 1 of photosystem II	Oxygen-evolving enhancer protein 1, chloroplast precursor (OEE1); 33 kDa subunit of oxygen evolving complex of photosystem II [PMID: 3556163, GI:18160]	2446.28	2447.64	2262.47	2253.43	3587.77	3574.89	3238.54	3267.54
Cre02.g134700	Cre02.g134700.t1.1	19868387	RPL4	Ribosomal protein L4, component of cytosolic 80S ribosome and 60S large subunit	Cytosolic 80S ribosomal protein L4; Cytosolic 60S large ribosomal subunit protein L4	761.363	743.936	835.88	822.106	1444.4	1451.99	1412.62	1405.13
Cre02.g137700	Cre02.g137700.t1.1	19868751				9.66922	9.3065	921.68	903.201	0.206176	0.100765	1.72244	2.13273
Cre02.g139950	Cre02.g139950.t1.1	19869044				4620.35	4690.02	4447.34	4411.65	8420.37	8305.96	7554.75	7667.9
Cre02.g141400	Cre02.g141400.t1.1	19868593	PCK1b	phosphoenolpyruvate carboxykinase, splice variant	phosphoenolpyruvate carboxykinase; PEP carboxykinase (EC 4.1.1.49); based on high similarity to PEPCK from Panicum maximum (GenBank AAQ10076) and many other plants; Target-P predicts no organelle targeting, so probably cytosolic form; may represent a minor splice variant of PCK1a	580.283	578.524	312.641	308.243	653.813	661.152	428.669	421.589
Cre02.g143050	Cre02.g143050.t1.1	19868333	RPP2	Acidic ribosomal protein P2	Cytosolic 80S ribosomal protein P2; Cytosolic 60S large ribosomal subunit protein P2	5906.74	5763.08	6148.84	5963.1	4108.27	4078.64	3415.88	3443.14
Cre03.g156900	Cre03.g156900.t1.1	19872177	LHCBM5	chlorophyll a-b binding protein of LHCII	_	5054.17	5114.65	3924.17	3953.16	3812.92	3775.78	3355.97	3342.59
Cre03.g157700	Cre03.g157700.t1.1	19871031	COX5C	Cytochrome c oxidase 11 kD subunit	Cytochrome c oxidase, subunit 5c (mitochondrial precursor)(homolog of complex V subunit 5c of A. thaliana (At3g62400, At2g47380); PMID: 15710684. No counterpart in fungi or animals.	1189.66	1212.92	1205.56	1185.49	353.354	333.102	322.322	332.886
Cre03.g165100	Cre03.g165100.t1.1	19871719	PSAI	Photosystem I reaction centre, subunit VIII	chloroplast-targeted; usually encoded in chloroplast genome	3126.01	3082.47	3103.12	3187.36	3672.76	3679.17	3752.33	3702.3
Cre03.g172300	Cre03.g172300.t1.1	19872184	MPC1a	Mitochondrial Phosphate Carrier 1	(=CR057) gi|28207754|gb|AY207497.1 [Chlamydomonas reinhardtii] similar to mitochondrial phosphate carrier, mitochondrial inner membrane protein, transfers inorganic phosphate into matrix; one of two alternatively spliced isoforms suggested by EST evidence.	731.255	757.736	722.637	705.087	407.977	407.622	288.466	284.211
Cre03.g179800	Cre03.g179800.t1.1	19871942	LCI24	low-CO2-inducible membrane protein	Low-CO2 inducible gene revealed by cDNA array analyses; SOSUI prediction: 3 transmembrane region. TargetP prediction: Mitochondria (confidence: 4); regulated by CCM1 [PMID: 15235119]	1112.8	1121.69	978.101	957.441	1270.94	1238.25	1767.68	1737.01
Cre03.g181150	Cre03.g181150.t1.1	19872146	FLA14	Outer dynein arm light chain 8	_	1519.44	1504.72	1103.43	1083.91	544.521	516.803	694.961	706.606
Cre03.g182551	Cre03.g182551.t1.1	19870982	PCY1	plastocyanin, chloroplast precursor	pre-apoplastocyanin, PETE [PMID: 2165059; PMID: 8940133]; structure of plastocyanin PDB: 2PLT; mutant = ac208 [PMID: 8463310]	13854	13834.5	12792.4	12827.6	20072.9	20083	18113.3	17953.2
Cre03.g190950	Cre03.g190950.t1.1	19871532				1656.06	1687.43	1922.13	1878.62	860.049	866.501	791.465	798.061
Cre03.g195400	Cre03.g195400.t1.2	19872018				585.007	586.249	882.111	871.909	486.863	508.566	698.201	684.953
Cre03.g203450	Cre03.g203450.t1.1	19871117	RPS21	Ribosomal protein S21, component of cytosolic 80S ribosome and 40S small subunit	Cytosolic 80S ribosomal protein S21; Cytosolic 40S small ribosomal subunit protein S21	3540.74	3595.89	4523.92	4576.4	2717.62	2834.56	2284.53	2307.98
Cre03.g203850	Cre03.g203850.t1.1	19871696	ATS1	ATP-sulfurylase	ATP-sulfurylase; catalyses the synthesis of adenosine-phosphosulphate (APS) from ATP and inorganic sulphate; Genbank entry U57088	464.985	459.543	284.269	289.353	629.933	636.209	569.344	583.926
Cre03.g204250	Cre03.g204250.t1.1	19871288	SAH1	S-Adenosyl homocysteine hydrolase	S-Adenosyl homocysteine hydrolase, found in the flagellar proteome [PMID: 15998802]	123.062	126.95	171.346	161.222	819.548	844.848	733.514	734.131
Cre03.g207050	Cre03.g207050.t1.1	19871044	RPL29	Ribosomal protein L29, component of cytosolic 80S ribosome and 60S large subunit	Cytosolic 80S ribosomal protein L29; Cytosolic 60S large ribosomal subunit protein L29	17385	17836.9	18576	18694.8	9031.8	9051.85	8276.97	8146.48
Cre04.g211800	Cre04.g211800.t1.1	19873609	RPL23	Ribosomal protein L23, component of cytosolic 80S ribosome and 60S large subunit	Cytosolic 80S ribosomal protein L23; Cytosolic 60S large ribosomal subunit protein L23	5030.32	4956.74	4629.12	4643.45	4629.32	4636.03	4168.42	4283.2
Cre04.g214150	Cre04.g214150.t1.2	19873740	THI4a	full-length thiazole biosynthetic enzyme	Involved in the synthesis of the thiazole moiety of thiamine pyrophosphate	2171.57	2215.39	1689.37	1707.81	1737.67	1751.91	1619.31	1634.39
Cre04.g216850	Cre04.g216850.t1.1	19873376	TUA2	alpha tubulin 2	alpha tubulin 2 [GI:27358004; PMID: 3855249, PMID: 3460413, PMID: 14676280]	1408.19	1378.6	961.644	980.982	1154.82	1163.01	1073.7	1148.93
Cre04.g220500	Cre04.g220500.t1.1	19873575				145.017	147.632	344.502	352.111	179.985	170.02	880.171	872.496
Cre04.g222700	Cre04.g222700.t1.1	19873601	_	elongation factor EF-3	related to elongation factor EF-3 (TEF3); found in the flagellar proteome [PMID: 15998802]	424.464	412.883	412.09	427.878	1077.23	1092.71	1143.09	1126.42
Cre04.g223100	Cre04.g223100.t1.1	19873753	CAH1	carbonic anhydrase	Carbonate dehydratase 1 in Chlamydomonas reinhardtii, also known as CA1; gi:115447; Carbonic anhydrase 1 precursor (Carbonate dehydratase 1) (CA1); alpha type - Carbonic anhydrase 1 localized in the periplasmic space and low-CO2 inducible gene regulated by LCR1 [PMID: 15155888] and CCM1 [PMID: 11287669, 15235119]	8072.32	8091.41	2302.97	2253.53	4994.35	5020.27	1834.77	1851.88
Cre04.g223300	Cre04.g223300.t1.1	19873491	CCP1	low-CO2-inducible chloroplast envelope protein	low-CO2-inducible 36kDa chloroplast envelope protein (LIP36-1), CO2-responsive gene; related to mitochondrial carriers; CCP1 and LCIE are located in head-to-head orientation; regulated by CCM1 [PMID: 15235119]	812.059	796.561	420.611	421.221	607.798	577.661	181.637	175.878
Cre05.g233050	Cre05.g233050.t1.1	19868004	FAP162	Flagellar Associated Protein	Flagellar Associated Protein, found in the flagellar proteome [PMID: 15998802]	829.723	848.624	863.93	883.203	1262.21	1256.26	1269.6	1266.4
Cre05.g233950	Cre05.g233950.t1.1	19867882				1442.79	1499.93	1685.56	1674.07	1153.48	1165.07	1332.7	1324.27
Cre05.g234550	Cre05.g234550.t1.1	19867902	FBA3	fructose-1,6-bisphosphate aldolase	Fructose-1,6-bisphosphate aldolase 1 (EC:4.1.2.13); probably plastidic, but predicted mitochondrial by Target-P; 87% identical to cDNA (Q42690); glycolytic enzyme that catalyses the reversible aldol cleavage or condensation of fructose-1,6-bisphosphate into dihydroxyacetone-phosphate and glyceraldehyde 3-phosphate [PMID: 8053679; Genbank entry X69969]	1215.04	1207.16	1331.24	1343.38	2901.28	2913.11	3243.12	3251.76
Cre05.g237450	Cre05.g237450.t1.1	19867944	PSRP-1	Plastid-specific ribosomal protein 1	Plastid-specific ribosomal protein 1, imported to chloroplast; Chloroplast small ribosomal subunit protein Plastid-Specific Ribosomal Protein 1. This is a different protein from plastid ribosomal protein S1, product of the PRPS1 gene.	1351.91	1379.49	1237.21	1206.74	526.09	526.924	418.083	421.859
Cre05.g241950	Cre05.g241950.t1.1	19868102	_	Voltage-dependent anion-selective channel protein	Voltage-dependent anion-selective channel protein. Outer mitochondrial membrane protein porin.	640.818	646.018	379.389	385.746	637.508	644.369	439.548	438.459
Cre05.g242400	Cre05.g242400.t1.1	19868108	PGR5	thylakoid membrane protein	Thylakoid membrane protein involved in cyclic electron flow, possibly as part of a ferredoxin-dependent quinone reduction pathway [PMID: 12176323, 15175756]. Arabidopsis mutant (pgr5) is deficient in NPQ, cyclic electron transport, and shows increased PSI photoinhibition; high-light inducible gene revealed by cDNA array analyses; in Volvox, one of the putative targets of RegA [PMID: 10654090].	783.403	779.434	981.298	966.204	381.558	386.055	514.136	526.343
Cre05.g243800	Cre05.g243800.t1.1	19867918	CPLD45	predicted protein	conserved expressed protein with possible function in PSII and possible lumen location	764.464	774.332	560.589	577.099	434.28	438.615	332.548	324.88
Cre05.g248400	Cre05.g248400.t1.1	19868134				11968.3	12311.7	4737.62	4703.9	3908.01	4011.13	1386.83	1388.33
Cre05.g248450	Cre05.g248450.t1.1	19868099				4642.74	4610.15	1677.17	1723.6	3615.39	3691.26	1224.84	1252.19
Cre06.g249250	Cre06.g249250.t1.1	19864008				560.061	540.314	581.665	600.146	763.133	774.233	618.573	588.486
Cre06.g250200	Cre06.g250200.t1.1	19863149	METM	S-Adenosylmethionine synthetase	S-Adenosylmethionine (AdoMet) synthetase (SAS1); Methionine Adenosyl-transferase; there is a single EST, with an intron, on the other strand: could be a regulatory mechanism	1558.54	1520.61	1512.75	1522.57	2303.97	2284.67	2256.43	2272.97
Cre06.g257150	Cre06.g257150.t1.1	19863949	RPL37a	Ribosomal protein L37a, component of cytosolic 80S ribosome and 60S large subunit	Cytosolic 80S ribosomal protein L37a; Cytosolic 60S large ribosomal subunit protein L37a	861.527	848.551	962.48	966.614	1354.26	1317.74	915.74	936.065
Cre06.g257450	Cre06.g257450.t1.1	19864143	ATPvL1	vacuolar H(+)-ATPase V0 sector, c/c' subunits	vacuolar H(+)-ATPase V0 sector, c/c' subunits, vacuolar ATP synthase 16 kDa proteolipid subunit	955.219	974.47	1159.09	1171.69	651.307	633.536	787.463	772.936
Cre06.g257500	Cre06.g257500.t1.1	19864058	FTT2	14-3-3 protein	Fourteen-three-three (FTT) protein, homolog of Vigna angularis accession BAB47119. Found in the flagellar proteome [PMID: 15998802], same as centriole protein POC8 [PMID: 15964273]. In addition to its presence in the flagellar and centriole proteomes, this protein was also found in the mitochondrial proteome (soluble fraction) [PMID: 16452484]; in this study, one of the peptides contained the N-t…	1100.4	1088.14	988.073	996.111	562.055	553.761	426.795	421.593
Cre06.g257601	Cre06.g257601.t1.1	19863497	PRX1	2-cys peroxiredoxin, chloroplastic	2-cys Peroxiredoxin, thioredoxin dependent peroxidase, chloroplast precursor, PMID: 11784321. Protein processed at aa 39 to produce N-terminus of SHAEKPL as determined by Edman degradation	756.236	777.147	771.652	745.472	1037.15	1042.37	953.209	950.232
Cre06.g259900	Cre06.g259900.t1.1	19864101	ATPC	chloroplast ATP synthase gamma chain	ATP synthase gamma chain, chloroplast precursor, gi:114638, PMID: 2904436, PMID: 8349573, PMID: 8543042	352.325	346.667	424.057	434.299	804.615	808.123	891.41	882.236
Cre06.g261000	Cre06.g261000.t1.1	19863055	PSBR	10 kDa photosystem II polypeptide	similar to At1g79040, chloroplast-targeted	2563.44	2555.17	2127.91	2092.37	5907.57	5894.92	5166.62	5226.85
Cre06.g263450	Cre06.g263450.t1.1	19863704				6811.36	6818.6	6654.13	6579.32	4664.01	4695.61	4977.98	4975.4
Cre06.g272650	Cre06.g272650.t1.1	19863080	LHCA8	light-harvesting protein of photosystem I	_	2075.96	2088.35	2100.81	2109.16	2466.05	2473.05	2229.53	2229.48
Cre06.g272800	Cre06.g272800.t1.1	19863065	RPS8	Ribosomal protein S8, component of cytosolic 80S ribosome and 40S small subunit	Cytosolic 80S ribosomal protein S8; Cytosolic 40S small ribosomal subunit protein S8	4929.19	4925.94	5425.18	5398.35	6087.93	6105.25	5403.21	5526.7
Cre06.g272950	Cre06.g272950.t1.2	19864003	RPS18	Ribosomal protein S18, component of cytosolic 80S ribosome and 40S small subunit	Cytosolic 80S ribosomal protein S18; Cytosolic 40S small ribosomal subunit protein S18	1817.73	1732.66	1849.08	1893.79	2254.97	2284.47	2141.18	2070.61
Cre06.g273600	Cre06.g273600.t1.1	19863107	RPS27a	Ribosomal protein S27a, component of cytosolic 80S ribosome and 40S small subunit	Cytosolic 80S ribosomal protein S27a; Cytosolic 40S small ribosomal subunit protein S27a; ubiquitin region ends with amino acid residue 74	3347.53	3238.47	3491.19	3486.25	3641.08	3684.74	3483.84	3470.2
Cre06.g282500	Cre06.g282500.t1.1	19863190	RPL23a	Ribosomal protein L23a, component of cytosolic 80S ribosome and 60S large subunit	Cytosolic 80S ribosomal protein L23a; Cytosolic 60S large ribosomal subunit protein L23a	6927.51	6943.36	7357.67	7429.5	4773.29	4772.77	4328.45	4337.04
Cre06.g282800	Cre06.g282800.t1.1	19863437	ICL1	isocitrate lyase	isocitrate lyase (EC 4.1.3.1); isocitrase; 98% identical to cDNA (AAB61446) [PMID: 9049260]	794.229	791.146	456.586	454.054	1246.01	1242.74	858.839	865.324
Cre06.g283050	Cre06.g283050.t1.1	19862989	LHCA1	light-harvesting protein of photosystem I	_	2495.03	2418.14	2400.21	2422.09	4127.95	4101.96	3673.04	3661.69
Cre06.g283950	Cre06.g283950.t1.1	19863027	LHCBM4	chloropyll a-b binding protein of LHCII	PSII-associated chlorophyll a/b-binding protein	6526.84	6547.99	5888.57	5725.27	4079.26	3950.22	2959.77	3021.02
Cre06.g284250	Cre06.g284250.t1.1	19863754	LHCBM8	chlorophyll a-b binding protein of LHCII	_	1492.96	1445.6	1061.51	1113.45	729.983	711.479	426.964	427.968
Cre06.g284600	Cre06.g284600.t1.1	19863911	RBD2	rubredoxin	cd00730, rubredoxin	644.613	624.513	630.898	643.657	719.721	713.98	1032.22	1029.61
Cre06.g285250	Cre06.g285250.t1.1	19864033	LHCBM6	chloropyll a-b binding protein of LHCII type I, chloroplast precursor	_	6429.3	6509.73	6037.77	6003.24	7082.03	6940.58	4728.82	4775.94
Cre06.g289550	Cre06.g289550.t1.1	19863609	RPL32	Ribosomal protein L32, component of cytosolic 80S ribosome and 60S large subunit	Cytosolic 80S ribosomal protein L32; Cytosolic 60S large ribosomal subunit protein L32	1141.94	1117.76	1354.09	1357.71	2939.46	2977.56	2923.3	2947.52
Cre06.g290950	Cre06.g290950.t1.1	19863782	RPS5	Ribosomal protein S5, component of cytosolic 80S ribosome and 40S small subunit	Cytosolic 80S ribosomal protein S5; Cytosolic 40S small ribosomal subunit protein S5	5933.3	5842.54	6182.66	6102.81	5406.29	5325.1	5385.49	5444.7
Cre06.g298650	Cre06.g298650.t1.1	19864016	_	eukaryotic initiation factor 4A-like protein	putative eukaryotic IF4A subunit (EIF41), similarity to eIF4A2, 10, 11,and 7; found in the flagellar proteome [PMID: 15998802]	604.282	594.818	613.204	610.581	1015.54	990.201	965.388	977.424
Cre06.g307500	Cre06.g307500.t1.1	19864169	LCIC	low-CO2 inducible protein	low-CO2 inducible protein (identical to BAD16683 [GI:46409059; PMID: 15235119]; homologous to LCIB; differentially expressed in Volvox regA mutant, impaired in somatic differentiation; TargetP prediction: Chloroplast (confidence: 2). Regulated by CCM1 [PMID: 15235119]	1009.88	1021.08	1011.18	1002.08	752.635	751.309	462.075	468.334
Cre06.g308250	Cre06.g308250.t1.1	19863196	RPS4	Ribosomal protein S4, component of cytosolic 80S ribosome and 40S small subunit	Cytosolic 80S ribosomal protein S4; Cytosolic 40S small ribosomal subunit protein S4	2775.45	2588.36	3028.89	2985.81	2537.96	2549.24	2835.81	2792.3
Cre06.g309000	Cre06.g309000.t1.1	19863622	NAR1.2	anion transporter	Nitrite transporter-homologue, possibly chloroplastic [PMID: 11912227, AY612639]; significant similarities with two anion transporters, the chloroplastic nitrite transporter NAR1 and formate transporters in bacteria. LCIA Induced by CO2-limiting stress but not regulated by nitrogen species through CCM1 [PMID: 15235119]	1544.91	1547.87	1094.26	1125.19	796.676	800.687	369.425	373.028
Cre06.g309231	Cre06.g309231.t1.1	19863950				887.637	883.221	864.357	858.297	1168.45	1135.27	1112.77	1103.48
Cre06.g310700	Cre06.g310700.t1.1	19863858	RPL36a	Ribosomal protein L36a, component of cytosolic 80S ribosome and 60S large subunit	This gene has also been annotated as RPL41 (according to the nomenclature used for the yeast ribosomal subunits) and shown to be the site of the cycloheximide resistance mutation ACT2. See PMID: 11254126. || Cytosolic 80S ribosomal protein L36a; Cytosolic 60S large ribosomal subunit protein L36a	8507.43	8578.28	8342.88	8487.61	4878.53	4775.02	3852.91	3876.82
Cre07.g315800	Cre07.g315800.t1.1	19859071	TEF16	predicted protein	Protein with unknown function, chloroplast location proposed; present in thylakoid-enriched fraction based on mass spectrometric peptide identification [PMID: 17078018]	512.829	514.989	568.379	554.52	797.51	767.494	689.085	707.164
Cre07.g321400	Cre07.g321400.t1.2	19859740				563.147	551.603	421.009	416.758	688.416	688.394	522.837	513.705
Cre07.g323800	Cre07.g323800.t1.1	19859347				567.277	588.507	644.697	633.852	1565.07	1586.61	1115.27	1087.78
Cre07.g330250	Cre07.g330250.t1.1	19859760	PSAH	Subunit H of photosystem I	Formerly called protein P28. See PMID: 2693938.	2051.18	2074.8	1813.69	1829.92	6628.47	6576.26	5824.54	5704.04
Cre07.g331900	Cre07.g331900.t1.1	19859216	RPS13	Ribosomal protein S13, component of cytosolic 80S ribosome and 40S small subunit	Cytosolic 80S ribosomal protein S13; Cytosolic 40S small ribosomal subunit protein S13	1690.38	1590.11	1754.17	1749.83	3626.61	3643.79	3513.44	3501.41
Cre07.g334550	Cre07.g334550.t1.1	19859870	PSAO	Photosystem I subunit O	similar to 10-kDa subunit of eukaryotic photosystem I [PMID: 11801243]; microarray element: 894019E07	152.679	150.343	188.655	192.473	1263.89	1261.92	1077.07	1096.3
Cre07.g337100	Cre07.g337100.t1.1	19859240				234.083	224.718	501.193	482.075	412.263	406.753	648.606	635.058
Cre07.g338050	Cre07.g338050.t1.1	19859428	ASA3	mitochondrial F1F0 ATP synthase associated 36.3 kDa protein	Mitochondrial ATP synthase associated protein 3; unknown evolutionary origin [PMID: 11744727, PMID: 15710684]	791.526	796.875	701.491	707.403	510.128	486.594	553.34	536.645
Cre07.g340350	Cre07.g340350.t1.1	19859687	ASA1	mitochondrial F1F0 ATP synthase associated 60.6 kDa protein	Mitochondrial ATP synthase associated protein 1; ATP synthase associated protein 1 (P60 or MASAP) (CAD29654); unknown evolutionary origin [PMID: 11744727, PMID: 15710684]	882.996	920.904	888.51	894.284	381.054	378.812	381.525	382.108
Cre07.g343100	Cre07.g343100.t1.1	19859399				1068.04	1076.26	1003.61	1010.59	526.986	518.135	503.054	492.66
Cre07.g344950	Cre07.g344950.t1.1	19859799	LHCA9	light-harvesting protein of photosystem I	Encodes a less abundant light-harvesting antenna protein for PS1. The sequence of this gene was deposited in Genbank (AF244524) by Merchan and Fernandez (2002). It is designated as Lhca9 in PMID: 14555480, and Lhca7 in PMID: 14652691, respectively.	1017.28	1008.5	1082.28	1081.28	2221.81	2218.19	2084.94	2057.03
Cre07.g349350	Cre07.g349350.t1.1	19859008	_	predicted protein	Protein of unknown function	865.317	857.296	837.738	870.201	493.291	508.488	371.035	396.51
Cre07.g357850	Cre07.g357850.t1.1	19859913	RPL22	Ribosomal protein L22, component of cytosolic 80S ribosome and 60S large subunit	Cytosolic 80S ribosomal protein L22; Cytosolic 60S large ribosomal subunit protein L22	2986.99	2957.61	3060.29	3028.58	3990.81	4093.93	3383.31	3412.01
Cre08.g359750	Cre08.g359750.t1.1	19858362	RPS9	Ribosomal protein S9, component of cytosolic 80S ribosome and 40S small subunit	Cytosolic 80S ribosomal protein S9; Cytosolic 40S small ribosomal subunit protein S9	7308.66	7285.34	7977.6	7951.71	6282.18	6289.87	6187.95	6338.62
Cre08.g360900	Cre08.g360900.t1.1	19858695				3383.77	3349.26	4623	4732.57	2352.97	2408.83	2172.85	2153.68
Cre08.g367400	Cre08.g367400.t1.1	19858633				7287.47	7376.61	2093.25	2032.28	1903.72	1874.52	733.655	762.361
Cre08.g367500	Cre08.g367500.t1.1	19858557	LHCSR2 || LHCSR3.1	Stress-related chlorophyll a/b binding protein 2	Stress-related chlorophyll a/b binding protein, similar to LI8I8r-1/LHCSR1; immediately downstream of LHCSR3 on scaffold 29.	5670.14	5524	1535.6	1546.84	960.653	932.83	370.217	348.051
Cre08.g372450	Cre08.g372450.t1.1	19858571	PSBQ	Oxygen evolving enhancer protein 3	Oxygen evolving enhancer protein 3 (OEE3); [gi:131395; gi:18164; PMID: 3556163; PMID: 3468511]	2250.46	2261.22	2224.96	2190.19	2889.21	2897.92	2652	2763.97
Cre08.g374100	Cre08.g374100.t1.2	19858643				3749.97	3756.74	1778.41	1802.61	525.731	511.494	397.926	383.727
Cre08.g377000	Cre08.g377000.t1.1	19858283				510.489	514.27	729.815	724.824	167.092	159.417	270.686	269.807
Cre08.g378376	Cre08.g378376.t1.1	19858473				190.117	163.68	170.258	150.362	770.749	653.952	646.017	805.566
Cre08.g380250	Cre08.g380250.t1.1	19858427	CP12	small protein associating with GAPDH and PRK	small Intrinsically Unstructured Polypeptide, associating with GAPDH and PRK and modifying their enzymatic properties; chloroplast-targeted [PMID: 8980547, PMID: 12492483, PMID: 12846565]	876.303	862.731	894.651	904.326	1552.25	1534.95	1265.94	1288.74
Cre08.g382500	Cre08.g382500.t1.1	19858583	RPS25	Ribosomal protein S25, component of cytosolic 80S ribosome and 40S small subunit	Cytosolic 80S ribosomal protein S25; Cytosolic 40S small ribosomal subunit protein S25	17695.6	17413.2	19700.4	19544.9	9342.02	9349.94	8513.15	8620.97
Cre09.g386650	Cre09.g386650.t1.1	19862711	ANT1	Adenine Nucleotide Translocator	Adenine Nucleotide Translocator 1, mitochondrial; ADP,ATP carrier protein (ADP/ATP translocase) (Adenine nucleotide translocator) [gi:113465, PMID: 8455552]	2366.34	2358.4	2061.3	2022.6	1766.43	1782.06	1427.89	1403.15
Cre09.g388200	Cre09.g388200.t1.2	19862776	RPL10	Ribosomal protein L10, component of cytosolic 80S ribosome and 60S large subunit	Cytosolic 80S ribosomal protein L10; Cytosolic 60S large ribosomal subunit protein L10	3544.95	3610.29	3552.09	3566.85	3214.13	3203.62	3644.71	3604.17
Cre09.g392350	Cre09.g392350.t1.1	19862908	_	glycine-rich RNA-binding protein	Protein similar to glycine-rich RNA-binding protein; found in the flagellar proteome [PMID: 15998802]	1324.99	1317.75	1219.71	1236.09	1409.86	1419.12	1000.24	989.398
Cre09.g395350	Cre09.g395350.t1.2	19862791	ASA9	mitochondrial F1F0 ATP synthase associated 12.0 kDa protein	putative mitochondrial ATP synthase associated protein 9; found in mitochondrial membrane proteome (ObsMass=998 kDa) and in soluble fraction (< 25kDa) by Atteia et al; appears resistant to NaOH and NaCl extraction; N-terminal Met removed, N-terminally acetylated; unknown function; also found in thylakoid proteome (Allmer, Naumann, Markert, Zhang and Hippler)	1103.27	1095.21	1022.16	1027.4	578.803	593.664	577.197	561.099
Cre09.g398700	Cre09.g398700.t1.1	19862564	CPLD27	coclaurine N-methyltransferase	conserved expressed protein related to putative coclaurine N-methyltransferase; this protein is found in the eyespot proteome	55.7728	57.1457	872.99	894.442	31.3422	31.3292	31.0835	29.2006
Cre09.g400650	Cre09.g400650.t1.1	19862871	RPS6	Ribosomal protein S6, component of cytosolic 80S ribosome and 40S small subunit	Cytosolic 80S ribosomal protein S6; Cytosolic 40S small ribosomal subunit protein S6	1521.36	1523.07	1668.58	1629.63	2454.96	2538.06	2332.34	2343.7
Cre09.g402300	Cre09.g402300.t1.1	19862941	ASA8	mitochondrial F1F0 ATP synthase associated 10.0 kDa protein	putative mitochondrial ATP synthase associated protein 8	709.906	689.145	656.521	648.593	563.938	582.168	521.275	518.407
Cre09.g404000	Cre09.g404000.t1.2	19862423	_	thylakoid lumenal 17.4 kDa protein	thylakoid lumenal 17.4 kDa protein, chloroplast precursor; has pentapeptide repeats	752.623	767.197	634.349	637.38	356.473	378.048	386.271	385.501
Cre09.g409150	Cre09.g409150.t1.1	19862424	QCR10	Ubiquinol:cytochrome c oxidoreductase 10 kDa subunit	Subunit 10 of mitochondrial Complex III (ubiquinol:cytochrome c oxidoreductase) [PMID: 15710684]; homolog of human QCRXI, bovine subunit 6.4 kD and yeast QCR10)	935.927	1013.57	963.897	947.375	497.105	497.591	484.965	480.216
Cre09.g411100	Cre09.g411100.t1.1	19862497	RPS10	Ribosomal protein S10, component of cytosolic 80S ribosome and 40S small subunit	Cytosolic 80S ribosomal protein S10; Cytosolic 40S small ribosomal subunit protein S10	2350.14	2342.88	2393.33	2366.15	2492.64	2562.89	2695.52	2682.17
Cre09.g412100	Cre09.g412100.t1.1	19862813	PSAF	photosystem I reaction center subunit III	Plastocyanin binding subunit	1978.57	1958.75	2066.5	2076.53	2926.8	2929.5	2689.84	2674.48
Cre10.g417700	Cre10.g417700.t1.1	19872544	RPL3	Ribosomal protein L3, component of cytosolic 80S ribosome and 60S large subunit	Cytosolic 80S ribosomal protein L3; Cytosolic 60S large ribosomal subunit protein L3	2213.94	2184.35	2134.99	2115.38	2822.26	2811.66	2548.9	2549.41
Cre10.g418450	Cre10.g418450.t1.1	19872509				597.067	576.85	684.365	671.561	1051.14	1043.74	797.176	778.311
Cre10.g420350	Cre10.g420350.t1.1	19872666	PSAE	photosystem I 8.1 kDa reaction center subunit IV	Photosystem I reaction center subunit IV, chloroplast precursor (PSI-E) (Photosystem I 8.1 kDa protein) [PMID: 2693938]	16720.7	16458.7	17860.5	17974.6	8499.67	8483.42	7885.14	7844.08
Cre10.g420700	Cre10.g420700.t1.1	19873081	ATP15	F1F0 ATP synthase epsilon subunit	F1F0-ATP synthase epsilon chain, polypeptide of 8.3 kDa, mitochondrial precursor; [=yeast ATP15, human ATP5E]; part of the F1 sector	1285.99	1269.67	1186.8	1167.56	670.481	668.398	598.13	625.789
Cre10.g420750	Cre10.g420750.t1.1	19872786	RPL30	Ribosomal protein L30, component of cytosolic 80S ribosome and 60S large subunit	Cytosolic 80S ribosomal protein L30; Cytosolic 60S large ribosomal subunit protein L30	6751.27	6724.8	6995.92	6937.7	4608.63	4648.42	4133.6	4279.6
Cre10.g424100	Cre10.g424100.t1.1	19872992	IPY1	inorganic pyrophosphatase	inorganic pyrophosphatase, identical to GI:14571671=CAC42762 (ppaI); probably chloroplastic (by homology to At5g09650)	785.999	768.7	762.447	783.661	883.082	890.125	837.766	854.086
Cre10.g425900	Cre10.g425900.t1.1	19872917	LHCA5	light-harvesting protein of photosystem I	_	3590.67	3576.63	3934.03	4004.3	2344.33	2326.45	2146.05	2144.82
Cre10.g430400	Cre10.g430400.t1.1	19873144	RPL37	Ribosomal protein L37, component of cytosolic 80S ribosome and 60S large subunit	Cytosolic 80S ribosomal protein L37; Cytosolic 60S large ribosomal subunit protein L37	7528.5	7461.56	6759.09	6640.2	5501.71	5544.2	5130.5	5097.08
Cre10.g431600	Cre10.g431600.t1.1	19872699				793.001	793.714	931.241	985.765	367.851	361.852	657.454	683.699
Cre10.g432800	Cre10.g432800.t1.1	19873035	RPSa	Ribosomal protein Sa, component of cytosolic 80S ribosome and 40S small subunit	Cytosolic 80S ribosomal protein Sa; Cytosolic 40S small ribosomal subunit protein Sa	2534.8	2467.7	2841.24	2799.71	3460.14	3408.77	3860.59	3843.77
Cre10.g436050	Cre10.g436050.t1.1	19873193	FSD1	superoxide dismutase [Fe]	superoxide dismutase [Fe], chloroplast precursor; iron superoxide dismutase; (FeSOD)	643.729	628.299	689.349	673.945	666.159	660.853	655.774	651.49
Cre10.g436550	Cre10.g436550.t1.1	19872965	LCI5	low-CO2-inducible protein	regulated by CCM1 [PMID: 15235119]	2718.48	2767.65	2379.52	2405.84	1847.68	1840.56	1890.3	1867.66
Cre10.g440400	Cre10.g440400.t1.1	19872443				940.462	973.739	857.422	860.981	856.663	847.509	855.139	836.365
Cre10.g452050	Cre10.g452050.t1.1	19873037	LHCA4	light-harvesting protein of photosystem I	_	2656.24	2663.18	2369.82	2357.38	3237.63	3213.67	3175.63	3161.66
Cre10.g452100	Cre10.g452100.t1.1	19873008	PSBY1	Ycf32-related subunit of photosystem II	PsbY is found in higher plants and is a homolog of Ycf32 in Cyanobacteria and Chromophyta. Expressed as a precursor polyprotein which is processed into two Ycf32-related proteins (PsbY-A1 and -A2) in higher plants. PMID: 16143838; very similar to the psbY2 gene which contains five repeats; the homologues in higher plant have only two repeats (PMID: 9512354), while 5 are found in the unique Ostreo…	911.14	881.211	749.847	743.158	950.202	936.883	741.65	762.089
Cre10.g452350	Cre10.g452350.t1.1	19872950				329.743	337.05	434.081	421.823	543.307	548.744	736.664	736.01
Cre10.g452800	Cre10.g452800.t1.1	19872396	LCIB	low-CO2-inducible protein	low-CO2 inducible protein (identical to BAD16683, PMID: 15235119); homologous to LCIC; TargetP prediction: Chloroplast (confidence: 5); regulated by CCM1	585.616	605.435	822.213	827.469	685.353	697.14	697.19	689.764
Cre10.g456200	Cre10.g456200.t1.1	19872825	RPS24	Ribosomal protein S24, component of cytosolic 80S ribosome and 40S small subunit	Cytosolic 80S ribosomal protein S24; Cytosolic 40S small ribosomal subunit protein S24	1744.4	1699.93	1903.92	1901.47	2049.89	2006.3	1660.94	1690.17
Cre10.g458450	Cre10.g458450.t1.2	19873118	GPX5	glutathione peroxidase	GPX5 is also named GPXH. GPXH gene expression is induced by singlet oxygen [PMID: 16160847; PMID: 15597886; PMID: 15517390; PMID: 11485197]. Homologous to glutathione peroxidase from other organisms. Probably cytosolic (no obvious N-terminal transit peptide).	150.036	162.602	2171.91	2171.46	312.867	315.032	1116.7	1106.94
Cre10.g459250	Cre10.g459250.t1.1	19873140	RPL35a	Ribosomal protein L35a, component of cytosolic 80S ribosome and 60S large subunit	Cytosolic 80S ribosomal protein L35a; Cytosolic 60S large ribosomal subunit protein L35a	4059.06	3900.04	3759.87	3829.59	5627.44	5604.23	4915.93	4735.11
Cre11.g475250	Cre11.g475250.t1.1	19860106	PSBW	Photosystem II reaction center W protein	[gi:20139842, PMID: 12856936]	2403.59	2417.64	2408.55	2374.9	4589.25	4657.77	4224.93	4185.49
Cre11.g476750	Cre11.g476750.t1.1	19860184	FNR1	Ferredoxin-NADP reductase	Ferredoxin-NADP reductase, chloroplast precursor; involved in photosynthetic linear, and possibly in cyclic, electron flow; major isoform	310.755	301.573	282.47	288.161	630.874	615.272	585.182	590.287
Cre11.g480150	Cre11.g480150.t1.1	19860183				2311.4	2290.48	2135.42	2137.01	3516.45	3553.55	4330.57	4229.6
Cre11.g481450	Cre11.g481450.t1.1	19860202	ATPG	CF0 ATP synthase subunit II precursor	CF0 ATP synthase subunit II precursor; ATP synthase B' chain chloroplast precursor	2096.43	2144.27	2477.38	2455.41	1323.93	1303.25	1443.54	1457.16
Cre12.g483850	Cre12.g483850.t1.1	19874428				2079.47	2104.07	1718.52	1721.66	672.668	673.535	684.404	693.191
Cre12.g484050	Cre12.g484050.t1.1	19874928	RPL36	Ribosomal protein L36, component of cytosolic 80S ribosome and 60S large subunit	Cytosolic 80S ribosomal protein L36; Cytosolic 60S large ribosomal subunit protein L36	3854.71	3833.94	4174.82	4145.89	2730.85	2702.23	2210.09	2233.2
Cre12.g485150	Cre12.g485150.t1.1	19874719	GAP1a	glyceraldehyde 3-phosphate dehydrogenase, dominant splicing variant	Gap1a splice variant. Glyceraldehyde 3-phosphate dehydrogenase (EC 1.2.1.12), organelle targeting sequence, but not clear whether mitochondrial or plastid; nearly identical to cytosolic G3PC_CHLRE [Genbank P49644; PMID: 8114942], except predicted to have N-terminal extension and lacking met residue at 1 position of G3PC_CHLRE; ESTs fully support this model. Either the genomic sequence is incorrec…	144.867	135.829	208.109	196.505	759.789	746.463	776.483	782.792
Cre12.g486300	Cre12.g486300.t1.1	19874176	PSAL	Photosystem I reaction center subunit XI	_	3436.3	3396.44	3113.05	3100.91	3468.35	3467.83	3396.99	3432.05
Cre12.g489100	Cre12.g489100.t1.2	19875341	RPL31	Ribosomal protein L31, component of cytosolic 80S ribosome and 60S large subunit	Cytosolic 80S ribosomal protein L31; Cytosolic 60S large ribosomal subunit protein L31	4269.56	4200.38	4809.47	4746.52	4503.31	4639.99	3843.36	3800.84
Cre12.g494050	Cre12.g494050.t1.1	19874344	RPL9	Ribosomal protein L9, component of cytosolic 80S ribosome and 60S large subunit	Cytosolic 80S ribosomal protein L9; Cytosolic 60S large ribosomal subunit protein L9	2067.95	2064.7	2034.73	1997.29	2830.73	2888.66	2282.64	2310.62
Cre12.g496000	Cre12.g496000.t1.2	19873996				678.997	702.731	633.472	603.818	513.376	526.801	490.905	490.072
Cre12.g498250	Cre12.g498250.t1.1	19875015	RPS17	Ribosomal protein S17, component of cytosolic 80S ribosome and 40S small subunit	Cytosolic 80S ribosomal protein S17; Cytosolic 40S small ribosomal subunit protein S17	3937.56	3833.8	4036.41	3858.95	3343.28	3276.04	3038.62	3054.93
Cre12.g498600	Cre12.g498600.t1.1	19874685	_	eukaryotic translation elongation factor 1 alpha 1	putative eukaryotic translation initiation factor 1 alpha 1 (EEF1A1), high similarity to chlamy database EF1A2 annotation; found in the flagellar proteome [PMID: 15998802]	4919.04	5107	4951.82	4969.59	2920.49	2921.07	2968.46	2968.43
Cre12.g498900	Cre12.g498900.t1.1	19875379	RPS7	Ribosomal protein S7, component of cytosolic 80S ribosome and 40S small subunit	Cytosolic 80S ribosomal protein S7; Cytosolic 40S small ribosomal subunit protein S7	2926.78	2922.21	3097.71	3107.06	2722.89	2742.95	2492.22	2565.67
Cre12.g504200	Cre12.g504200.t1.1	19874432	RPS23	Ribosomal protein S23, component of cytosolic 80S ribosome and 40S small subunit	Cytosolic 80S ribosomal protein S23; Cytosolic 40S small ribosomal subunit protein S23	2292.19	2207.58	2224.77	2220.39	1630.25	1647.96	1395.66	1397.63
Cre12.g508750	Cre12.g508750.t1.1	19874008	LHCA2	light-harvesting protein of photosystem I	_	717.522	713.973	703.798	687.642	1951.26	1937.83	1711.23	1693.66
Cre12.g510450	Cre12.g510450.t1.1	19874879	RPS28	Ribosomal protein S28, component of cytosolic 80S ribosome and 40S small subunit	Cytosolic 80S ribosomal protein S28; Cytosolic 40S small ribosomal subunit protein S28	2309.94	2321.59	2340.31	2372.69	1110.98	1128.3	926.768	986.825
Cre12.g512600	Cre12.g512600.t1.1	19874683	RPL18	Ribosomal protein L18, component of cytosolic 80S ribosome and 60S large subunit	Cytosolic 80S ribosomal protein L18; Cytosolic 60S large ribosomal subunit protein L18	7414.28	7436.19	7463.84	7471.05	4272.5	4164.28	4019.63	3941.82
Cre12.g514500	Cre12.g514500.t1.1	19874997	RPS11	Ribosomal protein S11, component of cytosolic 80S ribosome and 40S small subunit	Cytosolic 80S ribosomal protein S11; Cytosolic 40S small ribosomal subunit protein S11	2965.16	2960.67	3088.55	3107.07	3859.17	3802.27	3242.36	3342.29
Cre12.g520500	Cre12.g520500.t1.2	19874004	RPP0	Acidic ribosomal protein P0	Cytosolic 80S acidic ribosomal protein P0; Cytosolic 60S large ribosomal subunit protein P0	813.992	791.151	809.148	859.301	2164.28	2190.94	2245.25	2203.56
Cre12.g523850	Cre12.g523850.t1.1	19873812	QCR1	Ubiquinol:cytochrome c oxidoreductase 50 kDa core 1 subunit	Core I subunit of mitochondrial Complex III (ubiquinol:cytochrome c oxidoreductase) [PMID: 12746537]; putative mitochondrial processing peptidase, beta subunit (MPPB), identified in proteomic survey of mitochondrial membranes [PMID: 15710684]	687.626	693.598	646.594	637.859	383.978	359.1	382.344	394.409
Cre12.g528000	Cre12.g528000.t1.1	19874630				779.333	813.089	951.065	931.365	704.851	712.49	740.959	742.831
Cre12.g528750	Cre12.g528750.t1.1	19874908	RPL12	Ribosomal protein L12, component of cytosolic 80S ribosome and 60S large subunit	Cytosolic 80S ribosomal protein L12; Cytosolic 60S large ribosomal subunit protein L12	3067.01	2981.07	3359.36	3488.63	3954	3934.31	3599.17	3446.2
Cre12.g529400	Cre12.g529400.t1.1	19874686	RPS27-A	Ribosomal protein S27 isoform A, component of 80S ribosome and 40S small subunit	Cytosolic 80S ribosomal protein S27, isoform A; Cytosolic 40S small ribosomal subunit protein S27, isoform A	2627.64	2631.09	3039.06	2979.16	3614.64	3573.13	3004.6	3048.82
Cre12.g529650	Cre12.g529650.t1.1	19874848	RPL7a	Ribosomal protein L7a, component of cytosolic 80S ribosome and 60S large subunit	Cytosolic 80S ribosomal protein L7a; Cytosolic 60S large ribosomal subunit protein L7a	805.564	780.202	922.22	937.542	1912.28	1953.44	1914.71	1883.69
Cre12.g530650	Cre12.g530650.t1.2	19874911	GLN2	glutamine synthetase	Glutamine synthetase (EC 6.3.1.2), chloroplast precursor (Glutamate--ammonia ligase) (GS2), CO2-responsive gene; identical to GLNA2_CHLRE cDNA [SwissProt Q42689), PMID: 8938407]; arranged head-to-head with another glutamine synthetase gene. GLN3; GLN2 & GLN3 are very nearly identical at the predicted aa level, and also nearly identical in the coding sequence at the nucleotide level	472.556	481.212	467.821	471.681	882.293	908.221	802.945	841.679
Cre12.g532550	Cre12.g532550.t1.2	19873853	RPL13a	Ribosomal protein L13a, component of cytosolic 80S ribosome and 60S large subunit	Cytosolic 80S ribosomal protein L13a; Cytosolic 60S large ribosomal subunit protein L13a	2734.44	2715.49	2782.75	2815.35	4148.46	4137.6	4404.96	4425.28
Cre12.g535850	Cre12.g535850.t1.1		RPL8	Ribosomal protein L8, component of cytosolic 80S ribosome and 60S large subunit	Cytosolic 80S ribosomal protein L8; Cytosolic 60S large ribosomal subunit protein L8	2563.94	2380.96	2990.98	2925.98	2092.03	2152.84	2050.33	2053.28
Cre12.g537800	Cre12.g537800.t1.1	19874897	RPL7	Ribosomal protein L7, component of cytosolic 80S ribosome and 60S large subunit	Cytosolic 80S ribosomal protein L7; Cytosolic 60S large ribosomal subunit protein L7	2887.41	2863.68	3214.96	3158.05	3307.56	3294.96	2999.16	2909.2
Cre12.g542250	Cre12.g542250.t1.1	19874340				685.705	688.411	494.791	514.518	697.626	696.317	633.775	621.081
Cre12.g546150	Cre12.g546150.t1.1	19874996	PETM	cytochrome b6f complex PetM subunit	cytochrome b6f complex chain PetM, chloroplast precursor; GI:2493687; PMID: 8631873, PMID: 8616155, PMID: 7493968	1337.64	1315.42	1327.92	1307.45	1099.19	1114.81	969.938	985.481
Cre12.g548400	Cre12.g548400.t1.1	19874556	LHCBM2	light-harvesting protein of photosystem II	Encoding a light-harvesting antenna protein for PS2. This gene was reported under the name of LhcII-3 in PMID: 11522911, and the sequence has been deposited in Genbank (AB051205). Also designated as LhcbM2 in PMID: 16143838 and as Lhcbm2 in PMID: 14652691, respectively.	15244.8	15599.9	16354.8	16244.1	10394.3	10319.8	8026.22	8105.12
Cre12.g548950	Cre12.g548950.t1.1	19874871				5293.12	5203.48	5500.37	5621.08	12344	12283.2	9351.93	9351.6
Cre12.g549550	Cre12.g549550.t1.1	19874227	TUB2	beta tubulin 2	Beta-tubulin 2, GI:167458; major constituent of microtubules [PMID: 3460413, PMID: 6098820]; it binds one mole of GTP that is hydrolyzed and alters dynamic instability of the microtubule cytoskeleton	1975.38	1979.85	1095.39	1069.21	952.817	985.435	915.053	929.182
Cre12.g550850	Cre12.g550850.t1.1	19874633	PSBP1	Oxygen-evolving enhancer protein 2 of photosystem II	Oxygen-evolving enhancer protein 2, chloroplast precursor (OEE2) (23 kDa subunit of oxygen evolving complex of photosystem II) (OEC 23 kDa subunit) (23 kDa thylakoid membrane protein) (OEC23);PMID: 3468511; targeted to thylakoid lumen by TAT pathway	685.241	703.813	742.625	704.799	1829.84	1857.85	1591.37	1569.38
Cre12.g554800	Cre12.g554800.t1.1	19875354	PRK1	Phosphoribulokinase	Phosphoribulokinase, chloroplast precursor. Mapped in C. reinhardtii as the AC214 locus on linkage group XII/XIII. Calvin cycle enzyme. Activity regulated by light by way of chloroplastic thioredoxins and by formation of a complex with GAPDH and CP12 [PMID: 10751409, PMID: 9210468, PMID: 9210469, PMID: 9428675, PMID: 9428676, PMID: 9689144, PMID: 10409631, PMID: 10734091, PMID: 11741988, PMID: 11…	1002.7	992.098	884.636	887.496	857.748	868.324	904.088	910.799
Cre12.g558900	Cre12.g558900.t1.1	19874508	PETO	Cytochrome b6f complex subunit V	chloroplast precursor; gi|25090906|sp|Q9LLC6|PETO_CHLRE[25090906]. PMID: 7493961, PMID: 7493968	1240.72	1241.09	1038.22	1059.84	598.081	614.591	450.146	483.962
Cre12.g559250	Cre12.g559250.t1.1	19873956	FTT1	14-3-3 protein	Fourteen-three-three (FTT) 14-3-3-like protein GF14 nu (General regulatory factor 7) [Arabidopsis thaliana]: Found in the flagellar proteome [PMID: 15998802]; PLA1 (3.1.1.4 Phospholipase A2)	510.333	525.551	474.81	480.662	732.262	753.119	580.312	554.735
Cre12.g560950	Cre12.g560950.t1.1	19875155	PSAG	photosystem I reaction center subunit V	(PSI-G) (P35 protein) [PMID: 2693938]	2300.93	2247.9	2372.48	2358.93	2626.01	2607.81	2256.1	2267.52
Cre13.g566850	Cre13.g566850.t1.1	19869927	SOUL2	SOUL heme-binding protein	similar to plant SOUL protein, putative heme-binding domain; found in Chlamydomonas phosphoproteome [PMID: 16524901]; peptide data at N-term of model suggests that phosphorylation interferes with N-terminal Met cleavage: normally the MSSI... sequence should be matured to Ac-SSI	57.9214	67.207	2748	2740.19	9.02236	10.1326	22.4521	23.4505
Cre13.g568650	Cre13.g568650.t1.1	19870267	RPS3a	Ribosomal protein S3a, component of cytosolic 80S ribosome and 40S small subunit	Cytosolic 80S ribosomal protein S3a; Cytosolic 40S small ribosomal subunit protein S3a	2964.51	2939.98	3381.52	3329.49	4036.64	4110.36	3855.35	3879.75
Cre13.g568900	Cre13.g568900.t1.1	19870718	RPL17	Ribosomal protein L17, component of cytosolic 80S ribosome and 60S large subunit	Cytosolic 80S ribosomal protein L17; Cytosolic 60S large ribosomal subunit protein L17	1946.59	1945.22	2080.18	2130.03	3078.19	3134.07	2591.26	2592.95
Cre13.g570850	Cre13.g570850.t1.1	19870568				473.363	471.022	595.342	614.257	720.114	718.81	972.026	967.896
Cre13.g573351	Cre13.g573351.t1.1	19870573	RPS16	Ribosomal protein S16, component of cytosolic 80S ribosome and 40S small subunit	Cytosolic 80S ribosomal protein S16; Cytosolic 40S small ribosomal subunit protein S16	1159.7	1108.12	1444.21	1396.12	1463.98	1474.74	1304.25	1317.02
Cre13.g577100	Cre13.g577100.t1.1	19870286	ACP2	Acyl-carrier protein	_	848.394	849.932	745.511	748.19	1156.35	1178.35	1127.7	1119.55
Cre13.g580000	Cre13.g580000.t1.1	19870358				534.598	508.925	1200.35	1218.25	792.897	808.101	2105.7	2131.66
Cre13.g595250	Cre13.g595250.t1.2	19870607	RPL21	Ribosomal protein L21, component of cytosolic 80S ribosome and 60S large subunit	Cytosolic 80S ribosomal protein L21; Cytosolic 60S large ribosomal subunit protein L21	763.923	738.667	828.503	810.239	1235.2	1234.3	1086.05	1069.43
Cre13.g598900	Cre13.g598900.t1.1	19869866	LHCA6	light-harvesting protein of photosystem I	_	993.205	1020.74	1008.66	993.668	1778.37	1743.12	1547.36	1561.15
Cre13.g599400	Cre13.g599400.t1.1	19870602	CBLP	Receptor of activated protein kinase C 1	Receptor of activated protein kinase C 1, component of 40S small ribosomal subunit; Also cytosolic 40S small ribosomal subunit protein RACK1, PMID:16005888; also called GBLP	971.299	929.319	1108.35	1104.99	1526.39	1559.92	1476.23	1465.84
Cre14.g617900	Cre14.g617900.t1.1	19860523	RPL35	Ribosomal protein L35, component of cytosolic 80S ribosome and 60S large subunit	Cytosolic 80S ribosomal protein L35; Cytosolic 60S large ribosomal subunit protein L35	3305.63	3332.64	3273.79	3297.3	3404.8	3466.78	3236.09	3303.75
Cre14.g621450	Cre14.g621450.t1.1	19860329	RPL5	Ribosomal protein L5, component of cytosolic 80S ribosome and 60S large subunit	Cytosolic 80S ribosomal protein L5; Cytosolic 60S large ribosomal subunit protein L5	2015.82	2081.36	2506.85	2511.94	3916.09	3908.9	4293.92	4261.08
Cre14.g621550	Cre14.g621550.t1.1	19860530	TRXm	Thioredoxin m	Thioredoxin m, chloroplastic. Involved in the regulation of carbon fixation enzymes by light. This protein was previously named Ch2 [PMID: 2040309, PMID: 2191628, PMID: 1741302, PMID: 7632918] but it is not TRXh2 which is a cytosolic TRX. mRNA level regulated by light, circadian clock and heavy metals [PMID: 11898433; PMID: 10436225, PMID: 10398712, PMID: 11538123]. 3D structure determined [PMID:…	1639.03	1603.89	1568.01	1575.17	1004.77	1044.73	939.933	945.326
Cre14.g626700	Cre14.g626700.t1.1	19860398	PETF	Apoferredoxin	Fe2S2 containing redox protein involved in photosynthetic electron transfer, chloroplast localization [PMID: 16656453]	9484.45	9561.59	9927.85	9961.9	8818.39	8872.29	7758.07	7730.53
Cre14.g626750	Cre14.g626750.t1.1	19860769				285.072	290.209	590.583	592.917	238.353	229.218	730.975	700.233
Cre14.g630100	Cre14.g630100.t1.1	19860814	RPL13	Ribosomal protein L13, component of cytosolic 80S ribosome and 60S large subunit	Cytosolic 80S ribosomal protein L13; Cytosolic 60S large ribosomal subunit protein L13	1166.65	1181.59	1272.85	1268.87	1453.2	1461.71	1410.05	1396.25
Cre15.g635600	Cre15.g635600.t1.1	19864697	_	Nascent polypeptide-associated complex, alpha subunit	_	370.047	359.772	429.19	429.537	872.172	873.451	787.059	787.592
Cre16.g650100	Cre16.g650100.t1.1	19861400	PETN	subunit of the chloroplast cytochrome b6f complex	chloroplast targeted; ortholog in Volvox is germline-specific and a putative target of RegA repression	512.914	505.724	539.151	535.333	988.423	974.183	944.066	953.645
Cre16.g650550	Cre16.g650550.t1.1	19861368	FAP103	Flagellar Associated Protein, nucleoside diphosphate kinase-like	Flagellar Associated Protein similar to ncleoside diphosphate kinase, found in the flagellar proteome [PMID: 15998802]	1463.71	1450.55	1453.01	1472.1	1485.42	1450.95	1402.59	1417.73
Cre16.g652550	Cre16.g652550.t1.1	19861739	PRPL24	Plastid ribosomal protein L24	Chloroplast ribosomal protein L24, imported to chloroplast; Chloroplast large ribosomal subunit protein L24	803.04	775.148	829.425	825.328	340.21	318.009	379.771	378.001
Cre16.g659700	Cre16.g659700.t1.1	19861765				112.395	104.737	121.253	113.436	758.909	757.132	648.408	672.032
Cre16.g660200	Cre16.g660200.t1.1	19861136	RPS20	Ribosomal protein S20, component of cytosolic 80S ribosome and 40S small subunit	Cytosolic 80S ribosomal protein S20; Cytosolic 40S small ribosomal subunit protein S20	1837.03	1816.6	1797.02	1827.75	2434.4	2413.2	2089.58	2050.26
Cre16.g661050	Cre16.g661050.t1.1	19861394	RPL34	Ribosomal protein L34, component of cytosolic 80S ribosome and 60S large subunit	Cytosolic 80S ribosomal protein L34; Cytosolic 60S large ribosomal subunit protein L34	1337.33	1327.7	1344.53	1346.64	2580.49	2541.65	2327.95	2322.66
Cre16.g666301	Cre16.g666301.t1.1	19861077	RPS30	Ribosomal protein S30, component of cytosolic 80S ribosome and 40S small subunit	Cytosolic 80S ribosomal protein S30; Cytosolic 40S small ribosomal subunit protein S30	4006.63	3926.21	4136.83	4124.57	5207.72	5163.5	5277.79	5288.07
Cre16.g673650	Cre16.g673650.t1.1	19861108	LHCB5	minor chlorophyll a-b binding protein of photosystem II	_	1269.93	1263.29	1326.88	1347.18	2207.39	2221.47	2336.05	2315.51
Cre16.g680000	Cre16.g680000.t1.1	19861907	ATP5	Mitochondrial ATP synthase subunit 5, OSCP subunit	Mitochondrial ATP synthase, H+ transporting, subunit 5, Oligomycin sensitivity conferral protein (OSCP) or O subunit. Component of the peripheral stalk that links F1 and F0 domains. Homologous to the bacterial ATP synthase delta subunit (but not to the eukaryotic delta subunit of the central stalk). Gene from various eukaryotics named either ATP5 or ATPO [PMID: 16045926]	1761.55	1728.36	1535.61	1507.38	563.358	583.629	597.299	588.001
Cre16.g682300	Cre16.g682300.t1.1	19861404	RPS26	Ribosomal protein S26, component of cytosolic 80S ribosome and 40S small subunit	Cytosolic 80S ribosomal protein S26; Cytosolic 40S small ribosomal subunit protein S26	3773.4	3754.14	4252.38	4219.43	4841.11	4911.4	4523.09	4552.63
Cre16.g686900	Cre16.g686900.t1.1	19861347				616.903	589.998	692.724	719.594	287.375	292.224	344.964	338.838
Cre16.g687900	Cre16.g687900.t1.1	19861461	LHCA7	light-harvesting protein of photosystem I	_	1362.12	1310.67	1392.06	1393.48	2427.73	2444.58	2271.57	2248.86
Cre16.g691850	Cre16.g691850.t1.1	19861472	COX90	cytochrome c oxidase subunit	Cytochrome c oxidase subunit Cox90, mitochondrial [gi:22001295]. Note: homologues not found in other organisms except other green algae. Identification based on mutant phenotype [PMID: 11498007]	1179.09	1160.41	1041.39	1023.88	471.388	496.713	438.511	421.877
Cre16.g693700	Cre16.g693700.t1.1	19861737	UBC9	ubiquitin conjugating enzyme	similar to many plant ubiquitin conjugating enzymes	537.775	525.141	770.974	779.978	457.303	475.868	757.439	745.863
Cre17.g698000	Cre17.g698000.t1.1	19867293	ATP2	beta subunit of mitochondrial ATP synthase	ATP synthase F1F0 beta chain, mitochondrial precursor [PMID: 1386535; GI:584796]	1357.83	1367.86	1558.5	1539.1	906.846	903.559	807.061	778.347
Cre17.g700750	Cre17.g700750.t1.1	19866793				659.501	666.989	477.411	452.07	616.789	617.98	257.102	253.292
Cre17.g701200	Cre17.g701200.t1.1	19867250	RPL14	Ribosomal protein L14, component of cytosolic 80S ribosome and 60S large subunit	Cytosolic 80S ribosomal protein L14; Cytosolic 60S large ribosomal subunit protein L14	3104.14	3055.37	3398.73	3381	2320.38	2282.95	2433.83	2431.09
Cre17.g701650	Cre17.g701650.t1.1	19866814	RPL27	Ribosomal protein L27, component of cytosolic 80S ribosome and 60S large subunit	Cytosolic 80S ribosomal protein L27; Cytosolic 60S large ribosomal subunit protein L27	5934.47	5964.75	5450.46	5521.79	5881.67	5854.85	6050.16	5947.41
Cre17.g702950	Cre17.g702950.t1.1	19867006				1290.69	1297.32	1053.15	1034.61	1156.46	1163.83	618.116	620.78
Cre17.g720250	Cre17.g720250.t1.1	19866803	LHCB4	chlorophyll a-b binding protein of photosystem II	_	2179.72	2209.01	2267.75	2285.42	4467.46	4489.95	4155.07	4244.05
Cre17.g721300	Cre17.g721300.t1.1	19867291	ASA5	mitochondrial F1F0 ATP synthase associated 14.3 kDa protein	Mitochondrial ATP synthase associated protein 5; unknown evolutionary origin [PMID: 11744727, PMID: 15710684]	2287.31	2296.6	2234.57	2265.14	1265.57	1265.51	1190.03	1199.65
Cre17.g724300	Cre17.g724300.t1.1	19866909	PSAK	photosystem I reaction center subunit psaK	8.4 kD subunit of photosystem I (polypeptide 37) [PMID: 2693938]	5377.29	5327.86	5319.77	5281.23	4829.68	4895.87	4091.69	4097.88
Cre17.g732000	Cre17.g732000.t1.2	19866885	ATP9A	F1F0 ATP synthase subunit 9, isoform A	Mitochondrial F1F0-ATP synthase, subunit c/ATP9/proteolipid. Note: ATP9B encodes a related protein also predicted to encode subunit C of an organellar F1F0-ATP synthase. ATP9A and ATP9B are adjacent on genome, and divergently transcribed.	2151.13	2173.66	2028.88	2022.68	2372.79	2355.32	2164.36	2134.41
Cre17.g738300	Cre17.g738300.t1.1	19866974	RPP1	Acidic ribosomal protein P1	Cytosolic 80S ribosomal protein P1; Cytosolic 60S large ribosomal subunit protein P1	6007.36	5884.35	7259.28	7112.97	5466.01	5343.52	4564.3	4585.89
Cre18.g743700	Cre18.g743700.t1.1	19870865	ATP4	Mitochondrial F1F0 ATP synthase, delta subunit	Mitochondrial ATP synthase, H+ transporting, delta chain. Gene in other organisms variously named ATP4, ATPD, ATP16 [PMID: 1370454; PMID: 2536736]	658.34	654.41	682.574	717.301	481.81	473.638	512.855	513.385
Cre18.g744400	Cre18.g744400.t1.1	19870814	PETC	Rieske iron-sulfur subunit of the cytochrome b6f complex, chloroplast precursor	Rieske iron-sulfur protein; cytochrome b6f complex iron-sulfur subunit, chloroplast precursor gi:1717956, PMID: 8125984	1986.34	1971.32	2134.52	2137.53	1502.65	1492.19	1615.22	1646.99
Cre18.g749500	Cre18.g749500.t1.2		RPL28	Ribosomal protein L28, component of cytosolic 80S ribosome and 60S large subunit	Cytosolic 80S ribosomal protein L28; Cytosolic 60S large ribosomal subunit protein L28	1493.19	1390.9	1651.18	1658.29	1840.49	1799.41	1558.09	1570.36
Cre18.g749750	Cre18.g749750.t1.1	19870745	LHCA3	light-harvesting chlorophyll-a/b protein of photosystem I, type III	Chlorophyll a-b binding protein, chloroplast precursor; PMID: 14988484	1395.2	1398.08	1272.39	1233.58	2025.18	2056.94	1981.97	1960.99
Cre18.g749900	Cre18.g749900.t1.1	19870777	ATPD	chloroplast ATP synthase delta chain	ATP synthase delta chain, chloroplast precursor [gi:2493039, PMID: 8543042]	844.594	806.232	1094.49	1052.89	1330.57	1324.82	1474.78	1463.4
Cre18.g750000	Cre18.g750000.t1.1	19870881				492.093	472.374	740.624	725.696	314.038	278.408	335.57	344.454
Cre19.g757350	Cre19.g757350.t1.1	19862140	_	transcription factor	pfam01849, NAC domain; RNA polymerase II general transcription factor BTF3	485.552	477.511	460.896	483.394	741.013	768.469	760.719	769.129
Cre23.g766250	Cre23.g766250.t1.1	19858900	LHCBM1	chlorophyll a-b binding protein of LHCII	_	22919.5	23082.7	23048.1	22837.7	31276.4	31446.3	35487.6	35317.8
Cre26.g773500	Cre26.g773500.t1.1	19862030	RPL38	Ribosomal protein L38, component of cytosolic 80S ribosome and 60S large subunit	Cytosolic 80S ribosomal protein L38; Cytosolic 60S large ribosomal subunit protein L38	9925.47	9807.05	8787.06	8868.09	9497.96	9614.72	9135.94	9273.7
Cre28.g777200	Cre28.g777200.t1.1	19864397				1887	1842.89	1925.27	1984.39	2298.62	2257.9	1859.66	1827.53
Cre32.g781300	Cre32.g781300.t1.1	19862251	LHCBM3	Light-harvesting complex II chlorophyll a-b binding protein M3	_	20145	20347.1	18206.2	17958.1	29185.6	29218.4	29169.6	29539.7
Cre39.g786050	Cre39.g786050.t1.2	19867719				924.063	970.168	616.925	675.975	421.895	435.669	313.224	312.844
Cre41.g786600	Cre41.g786600.t1.1	19866537	AAA1	plastidic ADP/ATP translocase	ADP,ATP carrier protein; belongs to a plant-specific transporter family; most abundantly expressed isoform in a three-member family	1959.44	1960.45	2301.9	2288.93	1850.08	1889.27	2080.41	2089.03
Cre56.g791050	Cre56.g791050.t1.1	19866573	PSAD	Photosystem I reaction center subunit II, 20 kDa	Photosystem I reaction center subunit II, chloroplast precursor (Photosystem I 20 kDa subunit) (PSI-D) gi|2499965|sp|Q39615|	3437.7	3546.79	3273.46	3314.91	5097.09	5080.73	4999.52	4947.65

## Sheet: C1(WTMvsR)
Supplemental data set 1 Genes that display significant differential expression by pair-wise comparisons (greater than 2 fold, smaller than 0.5 fold, FDR<1%)
Each sheet contains genes from a pair-wise comparison. C1, WT mock vs RB; C2, sak1 mock vs RB; C3, Mock WT vs sak1; C4, RB WT vs sak1. Final sheet contains all genes found in C1-C4 in a single list.
gene name	full gene name	Genename	Defline	Description	WT-mock 1	WT-mock 2	WT-RB 1	WT-RB 2	sak1-mock 1	sak1-mock 2	sak1-RB 1	sak1-RB 2	C1 folds	C1 fdr	C2 folds	C2 fdr	C3 folds	C3 fdr	C4 folds	C4 fdr
Cre01.g000300	Cre01.g000300.t1.2				17.4809	14.6849	112.386	108.951	16.4878	17.5649	92.4962	94.9039	2.81113	4.54013e-200	2.63464	1.61792e-177	-0.108113	0.719954	-0.356728	0
Cre01.g001400	Cre01.g001400.t1.1	ZMP1	zinc-metallopeptidase-like protein	partial sequence similar to leishmanolysin-like peptidase (peptidase M8 family); neutral zinc metallopeptidases; zinc-binding site	0.396785	0.22089	4.57348	4.00763	1.3543	1.81408	13.6066	13.8857	2.50534	1.62411e-19	3.00569	4.91313e-62	1.23763	0.001303	1.46586	0
Cre01.g002000	Cre01.g002000.t1.2	_	predicted proteim	C2-domain containing protein; C2 domain is a Ca2+-binding motif present in phospholipases, protein kinases C, and synaptotagmins (amongst others)	84.2151	77.5066	165.703	166.912	55.232	53.0206	128.339	144.071	1.15369	3.43359e-46	1.54247	3.42551e-31	-0.754434	0	-0.405898	0
Cre01.g002050	Cre01.g002050.t1.2				9.63488	10.4859	30.2422	32.5492	13.5186	12.0878	75.1153	72.3409	1.66123	1.30935e-35	2.69372	1.20028e-173	0.131408	0.679731	1.09463	0
Cre01.g003050	Cre01.g003050.t1.1	SEC8	Component of the Exocyst Complex	Hypothetical Conserved Protein. Similar to SEC8, a subunit of the Exocyst.	3.68779	2.69455	23.5628	24.8047	1.78463	1.99362	21.5495	21.349	2.78376	5.18293e-84	3.4206	2.12812e-106	-0.746281	0.010653	-0.286206	0.014059
Cre01.g003950	Cre01.g003950.t1.2				15.8021	15.5433	5.35745	3.95618	14.5678	15.8217	2.20956	2.83489	-1.49528	7.35256e-24	-2.18181	2.27593e-40	-0.23915	0.106126	-0.886758	0.007738
Cre01.g004350	Cre01.g004350.t1.1				19.6252	20.6402	55.2078	51.8262	15.1297	16.7178	51.7874	51.2612	1.49887	2.7689e-57	1.89312	5.04156e-88	-0.515984	0.000242	-0.171815	0.065188
Cre01.g004600	Cre01.g004600.t1.2	RWP12	RWP-RK transcription factor	putative RWP-RK domain transcription factor [PMID: 15785851]; model is very tentative	0.742321	0.361594	1.52003	1.37298	1.53272	1.79782	3.42176	4.12009	1.17283	6.0523e-05	1.3054	4.32582e-10	1.11837	0.00038	1.15194	0
Cre01.g004800	Cre01.g004800.t1.1	_	expressed hypothetical protein	similarity to RWP-RK transcription factor	49.5842	46.9231	18.5009	17.8773	25.752	27.0136	8.378	9.10488	-1.20697	3.07697e-25	-1.27163	4.14659e-16	-1.03637	0	-1.10037	0
Cre01.g004900	Cre01.g004900.t1.1				20.1426	21.1185	58.5703	64.038	79.6148	86.4492	219.566	220.918	1.58397	1.04272e-29	1.63134	8.38902e-115	1.7016	0	1.70035	0
Cre01.g006550	Cre01.g006550.t1.2				6.42175	8.60232	23.1836	19.0376	0.355163	1.04148	0	0.349894	1.17063	7.55255e-05	-0.485817	0.864691	-1.60242	4.3e-05	-3.52038	0
Cre01.g007000	Cre01.g007000.t1.1				1.04946	1.53361	4.08941	4.93091	1.85733	1.66419	1.36911	2.36346	1.35396	4.95278e-06	0.210275	0.739313	0.164782	0.890459	-1.1453	0.000298
Cre01.g007300	Cre01.g007300.t1.1				1.27879	1.13257	16.9477	15.1901	1.44022	1.70943	0.303326	0.202693	2.85022	4.06922e-35	-1.15497	0.0242377	0.101495	0.988057	-4.13838	0
Cre01.g008081	Cre01.g008081.t1.1				16.1814	18.4413	4.0123	4.55398	7.65476	9.1548	3.09791	2.6616	-1.6069	1.62925e-16	-1.10236	3.1471e-05	-1.12915	0	-0.562948	0.12449
Cre01.g008150	Cre01.g008150.t1.2				1.78997	1.5853	4.96079	4.66021	3.56387	2.63907	19.849	19.009	1.38138	1.2064e-10	2.75741	3.91443e-103	0.548697	0.055339	1.82322	0
Cre01.g008450	Cre01.g008450.t1.1				0.186691	0.363759	2.48198	3.00746	1.89984	1.21111	0.974221	0.488256	1.72661	8.45891e-07	-0.535985	0.377079	1.07137	0.016408	-1.39631	0.000343
Cre01.g008650	Cre01.g008650.t1.2				5.08398	5.11169	19.8406	19.1331	2.59547	2.05778	8.98505	7.6993	1.97486	6.5286e-73	1.95393	2.47341e-23	-1.20207	0	-1.31724	0
Cre01.g009150	Cre01.g009150.t1.2				9.01092	6.7131	20.4115	21.8213	5.1595	5.04324	21.2061	18.2524	1.23923	8.5656e-07	1.7857	1.18718e-11	-0.5657	0.145385	-0.19908	0.600251
Cre01.g009650	Cre01.g009650.t1.1	BUG25	basal body protein	Basal body protein of unknown function, found in basal body proteome [PMID: 15964273]. Transcript upregulated during flagellar regeneration.	0.245586	0.143554	1.03578	1.36269	0.738885	1.14708	4.74175	4.41035	1.39781	0.000144245	2.10388	3.01596e-17	1.04528	0.014216	1.54631	0
Cre01.g010100	Cre01.g010100.t1.1				20.2554	20.8364	48.5628	48.6409	18.8147	17.8466	25.3855	23.9097	1.30569	6.38237e-26	0.638064	5.70858e-05	-0.340928	0.080639	-1.06552	0
Cre01.g010700	Cre01.g010700.t1.1				42.4241	37.8612	80.4917	87.4367	38.2261	36.6952	98.303	97.1845	1.15973	3.15884e-29	1.59022	4.33323e-62	-0.286728	0.064489	0.09902	0.453381
Cre01.g011400	Cre01.g011400.t1.2				2.46464	3.27771	1.07607	0.980333	1.48859	2.09798	0.442322	0.818515	-1.027	0.000143078	-0.993449	0.0231255	-0.736435	0.025831	-0.636395	0.175198
Cre01.g012500	Cre01.g012500.t1.1	PRA1	prenylated rab acceptor family protein	Expressed Protein. Similar to Prenylated Rab Acceptor Protein	98.7382	98.9908	247.185	240.488	92.6511	95.149	216.897	222.318	1.42655	1.8136e-155	1.46004	1.81611e-165	-0.273682	0.000424	-0.269727	0
Cre01.g015400	Cre01.g015400.t1.1				22.3239	22.7321	49.8844	49.0939	13.4012	12.1289	13.5617	18.0922	1.21515	4.89315e-26	0.506953	0.0986377	-0.946197	0	-1.71498	0
Cre01.g015500	Cre01.g015500.t1.1				39.1702	36.4331	115.131	121.18	56.9137	56.6073	213.797	221.888	1.72114	4.09033e-72	2.15401	2.39959e-202	0.368054	0.007107	0.756117	0
Cre01.g016150	Cre01.g016150.t1.1				85.4377	74.8311	456.929	475.408	36.2605	37.8829	36.6487	34.1316	2.64505	0	0.17045	0.389256	-1.26284	0	-3.78365	0
Cre01.g016200	Cre01.g016200.t1.2				5.40605	5.45939	10.6991	11.2694	2.50859	2.45206	7.28202	7.12674	1.0312	1.1477e-08	1.56546	1.04108e-12	-1.10154	6e-06	-0.684043	0.000132
Cre01.g017700	Cre01.g017700.t1.2				9192.94	9110.59	3448.65	3477.1	1055.55	1017.29	680.181	662.519	-1.26128	0	-0.379974	1.06695e-20	-3.34015	0	-2.48141	0
Cre01.g018350	Cre01.g018350.t1.1				3.39518	3.78019	7.94115	6.94525	4.53725	4.73468	6.99048	7.73178	1.00713	5.26304e-06	0.824438	0.000126987	0.140343	0.794975	-0.124602	0.754159
Cre01.g018600	Cre01.g018600.t1.1				76.4519	80.5055	162.355	151.181	50.988	48.1373	117.339	117.37	1.09663	2.73194e-27	1.4394	5.3572e-36	-0.819859	0	-0.527103	0
Cre01.g019500	Cre01.g019500.t1.1				1.95317	1.79711	9.15296	10.2938	4.70498	4.12968	13.6841	14.4731	1.88495	2.65781e-14	1.7063	1.31314e-16	0.734816	0.039154	0.385215	0.09806
Cre01.g022200	Cre01.g022200.t1.1				0.71458	0.696162	4.32416	3.83712	2.02346	1.60702	9.57093	9.96721	1.43861	4.47358e-05	2.07967	1.0196e-13	0.561685	0.310817	0.961881	0.000864
Cre01.g022550	Cre01.g022550.t1.2				0.254494	0.86777	2.2167	2.73314	1.12601	2.09121	2.32407	1.77488	1.16834	0.00512696	0.415301	0.527641	0.657352	0.303721	-0.279144	0.704232
Cre01.g024300	Cre01.g024300.t1.1	_	Mov34/MPN/PAD-1 domain family protein	_	16.3973	14.1196	29.9714	28.4978	15.9142	16.5622	32.5707	34.3996	1.00822	1.21684e-12	1.23702	6.47663e-22	-0.101571	0.761382	0.07368	0.770427
Cre01.g026500	Cre01.g026500.t1.2	ASP3	pepsin-type aspartyl protease	Aspartic protease, pepsin (A1) family; directed to secretory pathway	2.23687	2.5943	5.37144	6.57768	1.03683	0.644936	4.26149	3.80722	1.06549	0.000214048	1.74691	3.0819e-07	-1.02086	0.008242	-0.578682	0.06546
Cre01.g029700	Cre01.g029700.t1.1				40.5459	43.2406	84.0293	81.3772	34.1807	37.5609	106.626	120.681	1.05878	1.25743e-16	1.84107	1.60384e-33	-0.397502	0.029825	0.329021	0.005428
Cre01.g030150	Cre01.g030150.t1.1				5.31984	5.58762	1.98152	1.41343	7.94395	7.54927	3.03634	2.24638	-1.15638	4.482e-05	-1.13831	7.39586e-06	0.263061	0.4024	0.39857	0.415158
Cre01.g030200	Cre01.g030200.t1.1	PP2C4	protein phosphatase 2C-like protein	conserved expressed protein in flagellar proteome [PMID: 15998802], related to protein phosphatase 2C; chloroplast targeted prediction in Arabidopsis	62.1488	63.3871	25.5144	24.0746	54.9956	50.0886	34.1141	34.772	-1.14458	4.58455e-23	-0.352851	0.00486144	-0.448153	2e-05	0.341303	0.030894
Cre01.g031600	Cre01.g031600.t1.1	_	expressed hypothetical protein	DUF872 domain	19.5503	19.4235	58.0345	41.7496	20.0407	20.5937	48.6533	50.9614	1.35501	0.000310369	1.45626	1.63256e-23	-0.128089	0.73737	-0.100441	0.859377
Cre01.g031650	Cre01.g031650.t1.2	CGLD12	protein with potential galactosyl transferase activity	def transferase/ transferase, transferring glycosyl groups - pfam05637, Glyco_transf_34, galactosyl transferase GMA12/MNN10 family. This family contains a number of glycosyltransferase enzymes that contain a DXD motif. This family includes a number of C. elegans homologues where the DXD is replaced by DXH. Some members of this family are included in glycosyltransferase family 34	0.202209	0.295496	10.5678	10.8581	0.626273	0.437259	1.0552	1.05768	3.29737	5.49272e-35	0.669973	0.254346	0.313034	0.767082	-2.74362	0
Cre01.g033300	Cre01.g033300.t1.1				2.91211	2.55335	215.738	230.259	1.675	1.63726	0.633184	1.14241	5.72079	0	-0.38575	0.649558	-0.556781	0.230052	-6.94039	0
Cre01.g033700	Cre01.g033700.t1.1				11.2688	11.4773	2.91174	4.49244	5.98304	6.20267	4.54398	4.19744	-1.23889	9.57447e-08	-0.20126	0.673883	-0.960932	7e-06	0.121574	0.943223
Cre01.g034600	Cre01.g034600.t1.1				3.2513	3.21275	9.0282	9.76854	2.79487	2.28998	14.0983	13.2002	1.49758	1.9514e-18	2.4818	1.17757e-57	-0.466711	0.105784	0.404235	0.0051
Cre01.g034822	Cre01.g034822.t1.1				1.05389	1.74544	4.83139	4.24435	19.5844	17.4111	46.3798	45.9376	1.24204	0.000101271	1.51513	1.02732e-40	2.80864	0	3.00846	0
Cre01.g035450	Cre01.g035450.t1.1	_	predicted protein	Conserved protein of unknown function; has domain IPR006214, which contains a subset of Bax inhibitor-1 proteins	14.2425	10.3075	52.6072	47.162	21.6055	22.8786	82.8166	84.7852	1.93996	8.0887e-32	2.06471	5.20461e-61	0.583435	0.016693	0.613417	0
Cre01.g035650	Cre01.g035650.t1.1				0.35791	0.261514	4.8403	6.7266	0.633429	0.928736	3.50194	3.35417	2.52167	9.94152e-12	1.67914	7.5357e-07	0.472845	0.46329	-0.734652	0.020989
Cre01.g036000	Cre01.g036000.t1.2				1.94026	2.57074	24.0515	22.7822	3.91461	4.16206	17.9549	16.441	3.02033	7.47866e-70	2.14439	1.06347e-36	0.502336	0.158458	-0.54746	3.5e-05
Cre01.g038250	Cre01.g038250.t1.1	SDC1	serine decarboxylase	Serine decarboxylase involved in ethanolamine production for PtdEtn biosynthesis	35.9454	31.3465	63.4457	67.8334	54.6814	56.3605	102.101	93.1871	1.06162	7.01969e-23	1.0405	4.37021e-30	0.502709	4.1e-05	0.44573	1e-06
Cre01.g039350	Cre01.g039350.t1.1	NCR2	NADPH-cytochrome P450 reductase	NADPH-cytochrome P450 reductase (NADPH-ferrihemoprotein reductase)	8.49694	9.89546	22.2971	21.1525	13.4823	11.5734	40.9423	39.5061	1.2583	5.08265e-15	1.85427	3.89762e-52	0.218567	0.434326	0.747236	0
Cre01.g039500	Cre01.g039500.t1.1	FAP89	Flagellar Associated Protein	Conserved uncharacterized Flagellar Associated Protein, similar to Notchless; found in the flagellar proteome [PMID: 15998802]	2.18049	1.63407	0.51262	0.600445	1.97899	1.9344	0.632142	0.974814	-1.00979	0.00465512	-0.786143	0.0518372	-0.117097	0.882719	0.246165	0.79001
Cre01.g041650	Cre01.g041650.t1.2				5.8866	3.91014	14.4744	14.368	14.6801	18.5152	25.1332	22.8597	1.2293	2.84282e-05	0.701491	0.00348344	1.17747	6.9e-05	0.547025	0.038469
Cre01.g043950	Cre01.g043950.t1.2				4.34295	4.34692	0.98184	0.745405	5.21184	5.55754	0.879615	0.570502	-1.58553	6.09168e-09	-2.11675	1.88453e-14	0.092167	0.871908	-0.251548	0.799667
Cre01.g048450	Cre01.g048450.t1.2				2.68556	3.59747	6.77134	8.78768	4.60439	3.70214	8.75889	7.75522	1.17882	3.67325e-05	1.10187	8.58798e-07	0.162061	0.79608	-0.023118	1
Cre01.g049200	Cre01.g049200.t1.2				6.40409	7.91618	2.52546	2.89651	3.77799	3.81199	1.61704	1.7409	-1.03804	8.22263e-06	-0.760188	0.019696	-0.959138	1e-05	-0.644264	0.078606
Cre01.g051800	Cre01.g051800.t1.1	AST2	aspartate aminotransferase	Transaminase A; Target-P gives weak prediction of mitochondrial targeting	11.881	10.8733	4.40133	3.86654	7.75238	8.40814	5.94942	4.49872	-1.07184	1.06971e-05	-0.341412	0.351915	-0.605848	0.010186	0.172352	0.777099
Cre01.g051950	Cre01.g051950.t1.1	ASP2	pepsin-type aspartyl protease	Aspartic peptidase, pepsin (A1) family; similar to chloroplast nucleoid DNA binding protein (CND41) identified in tobacco (PMID: 10683432); its reported chloroplast localization is uncertain, and it usually shows a typical signal peptide; could be secreted or lysosomial; this gene model is incomplete	28.1326	26.3031	51.5877	51.0005	30.0923	29.236	65.6055	59.651	1.01376	1.34785e-21	1.29268	4.39676e-38	-0.075016	0.773064	0.163898	0.133317
Cre01.g054200	Cre01.g054200.t1.1				21.038	24.8682	66.3544	70.5428	24.0774	24.2628	58.5514	64.558	1.55921	7.70444e-23	1.49178	3.30836e-21	-0.108735	0.809441	-0.264097	0.108073
Cre01.g055750	Cre01.g055750.t1.2				7.88685	7.07376	16.758	14.789	9.41621	10.6117	13.0655	17.7891	1.04828	3.41912e-07	0.78427	0.0167824	0.185567	0.629286	-0.154521	0.777579
Cre01.g056550	Cre01.g056550.t1.2				4.8413	5.70369	14.7617	13.8044	8.26924	9.44631	17.332	15.7042	1.34004	1.22497e-10	1.05684	1.05018e-08	0.458098	0.119371	0.08366	0.853863
Cre01.g057050	Cre01.g057050.t1.1				2.97215	2.82129	6.35848	7.09319	1.82081	2.2412	1.52446	2.05954	1.09975	4.54745e-06	0.0437451	1	-0.536134	0.144456	-1.71674	0
Cre01.g058650	Cre01.g058650.t1.2				26.5399	34.0272	100.663	89.1823	13.0719	17.217	62.6056	64.1716	1.73388	5.78574e-26	2.23357	4.69767e-82	-1.12137	0.000146	-0.690018	0
Cre01.g058850	Cre01.g058850.t1.1				2.73501	1.83185	0.548546	0.458947	2.49584	2.1439	0.297338	1.04313	-1.10682	0.00319915	-1.11714	0.014226	-0.115602	0.900426	0.067868	0.995988
Cre01.g060050	Cre01.g060050.t1.2				0.15089	0.147001	2.0752	1.95809	0.93466	0.587315	0.459316	0.657709	1.7764	6.88777e-07	-0.107422	1	0.825061	0.112689	-1.31429	0.000983
Cre01.g060650	Cre01.g060650.t1.2				0.350921	0.38461	1.32721	1.13847	0.776325	0.607067	0.343355	0.382404	1.10344	0.00240036	-0.420435	0.515969	0.390478	0.505988	-1.27434	0.00108
Cre01.g061131	Cre01.g061131.t1.1				2.96218	4.61732	1.1769	0.618573	2.88336	2.13514	0.772884	0.688625	-1.20949	0.00599138	-0.993858	0.0199704	-0.57742	0.184028	-0.206508	0.859377
Cre01.g061750	Cre01.g061750.t1.1	SPT2	serine palmitoyltransferase	similar to serine palmitoyltransferase, first step in sphingolipid biosynthesis	33.959	35.7871	106.129	108.559	32.7397	32.3449	98.7183	100.678	1.70604	2.57988e-78	1.81945	2.91007e-90	-0.28843	0.059995	-0.223962	0.00652
Cre01.g061800	Cre01.g061800.t1.1	GSD1	glutamic-gamma-semialdehyde dehydrogenase	glutamate-5-semialdehyde (GSA) dehydrogenase (EC 1.2.1.41); glutamate-5-phosphate reductase; lacks glutamate kinase domain typically associated with this enzyme (delta 1-pyrroline-5-carboxylate synthetase) in plants; glutamate kinase is encoded by a separate gene family (PROB1 & PROB2)	28.3845	26.6845	62.176	58.5157	39.8752	40.1231	132.175	131.427	1.22277	5.03617e-32	1.9365	4.54749e-154	0.322691	0.018495	0.99666	0
Cre01.g064400	Cre01.g064400.t1.1	GSTS2	glutathione S-transferase	Expression is induced by various oxidative stress conditions [PMID: 17435007; PLANT SCIENCE 168:747-759] || putative glutathione S-transferase (sigma class) (GST class-sigma)(Glutathione-dependent PGD synthetase) (Prostaglandin-H2 D-isomerase) (Hematopoietic prostaglandin D synthase) (H-PGDS); binds to glutathione beads (Joshua Rappoport, pers. comm.). Found in the flagellar proteome [PMID: 15998…	36.6715	35.9216	71.8392	69.4052	73.5903	71.4122	96.0311	95.7329	1.04008	1.67304e-16	0.634471	1.47881e-10	0.757562	0	0.314695	0.005103
Cre01.g064450	Cre01.g064450.t1.2				23.5758	18.7147	5.33725	8.33554	19.5744	15.6088	9.87251	10.1495	-1.1462	3.09269e-05	-0.472871	0.158331	-0.397225	0.17178	0.358649	0.509041
Cre01.g065250	Cre01.g065250.t1.2				4.9309	4.39497	0.673338	0.563355	5.84875	5.89846	0.273736	1.46336	-1.65322	2.42873e-07	-1.98489	1.4562e-08	0.107112	0.889464	0.052194	0.988662
Cre01.g065367	Cre01.g065367.t1.2				0.500797	0.780623	3.30599	4.21301	1.32947	1.03961	6.01067	6.28676	1.58498	1.20301e-06	2.00542	4.51893e-12	0.350347	0.62865	0.510791	0.125506
Cre01.g066000	Cre01.g066000.t1.1	MKS1	ortholog of Meckel Syndrome 1	Ortholog of the human Meckel Syndrome 1 gene	0.217782	0.848675	2.99516	3.89812	2.31259	2.26048	7.57643	7.21454	1.24059	0.00387586	1.37435	8.82769e-05	0.825397	0.145625	0.743703	0.066555
Cre01.g068250	Cre01.g068250.t1.1				1.97294	1.92209	13.4847	11.0757	4.92014	5.58497	27.7667	26.8938	1.92046	1.96677e-12	2.30373	2.08989e-29	0.785082	0.04705	0.958919	1e-06
Cre01.g068400	Cre01.g068400.t1.2				0.161975	0.473401	1.13857	1.83617	0.191109	0.653811	0.328706	0.470685	1.32786	0.00499631	0.162684	1	0.076826	1	-1.32309	0.00437
Cre01.g069550	Cre01.g069550.t1.2				3.44099	4.64164	8.41314	8.60692	3.90376	4.12106	11.6639	8.53776	1.01907	1.38892e-05	1.38849	4.62382e-05	-0.160494	0.741731	0.102756	0.842768
Cre01.g069600	Cre01.g069600.t1.1				6.77945	7.01241	1.45804	2.39697	7.48041	9.91807	1.01911	1.16743	-1.32959	4.09452e-07	-2.20782	1.87311e-10	0.105616	0.794975	-0.634185	0.153322
Cre01.g070900	Cre01.g070900.t1.1				4.09509	3.98954	1.27517	1.2447	7.52099	6.54954	3.4944	2.82904	-1.08686	0.000401398	-0.79911	0.0019219	0.50643	0.057171	0.921906	0.010146
Cre01.g072650	Cre01.g072650.t1.1	NDA1	mitochondrial type-II NADH dehydrogenase	putative mitochondrial NADH dehydrogenase (ubiquinone oxidoreductase). Rotenone-insensitive [PMID: 10571867]. Alternative enzyme to mitochondrial complex I; matrix side of inner membrane [=NDI1].	20.3923	20.7546	41.4678	46.0845	28.9328	28.2809	64.5026	60.5824	1.16267	1.74553e-21	1.33908	1.35777e-41	0.257301	0.148154	0.388582	0.000149
Cre02.g076650	Cre02.g076650.t1.1				0.552665	0.807631	4.81385	3.9569	6.3577	5.01937	14.9007	13.4903	1.20515	0.00384693	1.25021	2.98201e-05	1.34869	0.001179	1.23396	0.000154
Cre02.g076800	Cre02.g076800.t1.1	_	sterol reductase	Sterol reductase with homology to ERG4/ERG24 proteins, participates in sterol/ergosterol biosynthesis	24.7349	26.0927	64.2802	60.6292	18.9602	20.7134	77.966	75.6772	1.35773	3.25893e-28	2.11597	5.67729e-74	-0.516781	0.004986	0.175724	0.159648
Cre02.g077850	Cre02.g077850.t1.1	FAP212	Flagella Associated Protein	Flagellar Associated Protein, found in the flagellar proteome [PMID: 15998802]	30.3471	33.9393	10.789	10.1155	14.6602	11.2496	2.96256	2.02468	-1.32076	2.89613e-14	-1.73197	3.77557e-08	-1.38953	0	-1.76239	0
Cre02.g079300	Cre02.g079300.t1.1	VPS4	AAA-ATPase of VPS4/SKD1 family	Expressed Protein. Similar to VPS4/SKD1 AAA-ATPase, involved in vacuolar protein transport	26.4731	25.9029	60.7864	62.9393	33.2039	30.8629	78.3829	82.28	1.32364	7.44664e-36	1.53875	5.80512e-65	0.082517	0.752505	0.253131	0.006585
Cre02.g079550	Cre02.g079550.t1.1	DRP2	Dynamin-related GTPase	Expressed Protein. Similar to the DRP2 (ADL3/ADL6) class of Dynamin GTPases involved in many vesicle trafficking events at the Golgi, Plasma membrane, etc.; is missing GTPase domain from N-terminus, with no VISTA or cDNA support	29.5632	29.5504	67.5288	70.4268	25.48	25.0537	66.1375	60.6321	1.32459	1.28852e-52	1.53936	8.90429e-58	-0.413266	0.000969	-0.240194	0.003447
Cre02.g080950	Cre02.g080950.t1.1				4.66659	3.8391	9.22285	9.65213	5.87302	6.63767	10.5525	11.7526	1.06135	8.0764e-06	0.972836	5.37084e-06	0.289778	0.444141	0.109935	0.812406
Cre02.g083354	Cre02.g083354.t1.1				3.30048	4.14619	0.875978	1.01051	3.30489	2.92992	0.906478	1.13576	-1.19205	0.000242256	-0.992504	0.00913249	-0.352812	0.350265	-0.005736	1
Cre02.g083650	Cre02.g083650.t1.2				77.2087	78.325	196.082	207.703	78.1975	85.6945	105.579	104.04	1.47512	3.45376e-68	0.588249	6.51169e-09	-0.124648	0.463263	-1.05037	0
Cre02.g085257	Cre02.g085257.t1.1	COP4	chlamyopsin 4 light-gated ion channel	Light-gated ion channel (Channelrhodopsin-2), archaeal-type opsin 2 AF461397 [PMID: 14615590]; retinal binding protein; not a FKBP-type rotamase, in spite of interpro hit [gi:15823748]	2.92338	3.47104	0.83761	0.981114	3.63783	4.34606	0.794544	0.955695	-1.04189	0.00318193	-1.40389	5.18438e-05	0.090761	0.949299	-0.104941	1
Cre02.g087550	Cre02.g087550.t1.2				8.45107	9.66098	24.2309	26.3187	8.55905	7.77465	20.9032	21.3783	1.54746	3.70968e-44	1.56379	2.64725e-42	-0.327766	0.070552	-0.369575	0.000219
Cre02.g089900	Cre02.g089900.t1.1	_	secretory carrier membrane protein, SCAMP	Secretory carrier membrane protein (SCAMP) family protein, contains Pfam domain. Homologous to Arabidopsis At1g32050.1	107.434	108.332	203.476	196.227	61.7596	59.8254	132.586	133.308	1.01289	2.59965e-52	1.35184	6.44944e-64	-1.00581	0	-0.70173	0
Cre02.g092350	Cre02.g092350.t1.1	CYP51G1	sterol 14 desaturase	Cytochrome P450 like protein similar to CYP51A (ABC59074), possible sterol 14-demethylase involved in sterol/ergosterol biosynthesis. CYP51G1 is the P450 nomenclature for sterol 14 alpha demethylases of green plants. ERG11 is a name from the fungal ergosterol pathway. These are orthologs.	26.6881	28.764	55.3933	55.5742	49.7429	48.2586	116.605	108.818	1.09825	5.59795e-26	1.42694	9.72359e-81	0.597621	0	0.891122	0
Cre02.g093589	Cre02.g093589.t1.1				0.793571	1.54623	12.3692	11.3634	3.51116	5.49127	22.7762	29.0561	1.34027	0.00138092	1.80118	5.02586e-07	0.561658	0.421112	0.742591	0.065338
Cre02.g093600	Cre02.g093600.t1.1	_	expressed hypothetical protein	_	5.12432	5.46769	29.8679	27.9531	12.5239	10.2366	63.6679	67.8595	2.25778	9.23518e-39	2.66024	1.10601e-110	0.754266	0.002656	1.03978	0
Cre02.g093750	Cre02.g093750.t1.1	NRX2	Nucleoredoxin 2	Nucleoredoxin, nuclear thioredoxin-like protein, contains two thioredoxin motifs with a WCPPC active site in each motif.	102.71	104.593	261.007	283.33	90.8884	86.2813	414.666	419.879	1.50264	7.95408e-60	2.45369	0	-0.418568	5.3e-05	0.494999	0
Cre02.g093800	Cre02.g093800.t1.1				8.34517	8.31075	27.3751	24.5633	10.8308	10.1056	29.5159	35.2438	1.51234	5.85759e-14	1.71025	1.16999e-16	0.10263	0.899136	0.18477	0.430976
Cre02.g099000	Cre02.g099000.t1.1	SYP71	Qc-SNARE protein, SYP7-family	Expressed Protein. Similar to SYP7 Qc-SNAREs, involved in endosomal/cell plate trafficking.; part of 2-member gene family of tandemly repeated genes (<-71 <-72)	33.5697	40.1561	105.389	94.8841	34.4061	37.8577	115.492	106.132	1.50626	2.39225e-29	1.8039	1.44023e-62	-0.212864	0.306407	0.026457	0.968063
Cre02.g101650	Cre02.g101650.t1.1				4.2798	4.51694	0.490501	1.59593	3.15599	2.62215	0.620375	0.621834	-1.10046	0.0078884	-1.06269	0.0304823	-0.538397	0.208488	-0.320798	0.726881
Cre02.g101800	Cre02.g101800.t1.2				3.73383	6.54765	13.2372	13.5892	7.70948	5.3827	8.22676	7.5951	1.13293	0.000160335	0.41814	0.362673	0.116051	0.976795	-0.737287	0.018485
Cre02.g102050	Cre02.g102050.t1.2				2.78596	2.81657	5.97623	6.91543	12.6056	12.1397	12.5266	12.3727	1.14352	3.89489e-08	0.244824	0.138125	1.74138	0	0.792561	1e-06
Cre02.g102650	Cre02.g102650.t1.2				3.25362	2.30528	5.8113	5.52117	5.34695	6.0671	8.63626	9.02494	1.03147	3.38239e-07	0.832307	5.98007e-08	0.752994	0.000982	0.494643	0.003652
Cre02.g105750	Cre02.g105750.t1.2				2.12493	2.15642	8.68609	8.95397	4.70089	4.9013	20.4062	24.6994	1.71423	3.06124e-13	2.28275	1.303e-20	0.7354	0.020913	1.16353	0
Cre02.g106350	Cre02.g106350.t1.1	CGL68	vanadium-dependent haloperoxidase-like protein	Acid phosphatase/vanadium-dependent haloperoxidase related, DUF212	15.3941	16.056	34.0406	35.0101	24.0393	20.208	51.192	43.8919	1.14782	1.79718e-11	1.28331	5.57114e-13	0.254708	0.34196	0.324954	0.037875
Cre02.g106400	Cre02.g106400.t1.2				2.92289	2.84755	7.5327	8.62528	6.08169	4.91972	14.7717	12.7405	1.32815	4.6162e-09	1.45006	3.27975e-16	0.586489	0.045578	0.607714	0.001029
Cre02.g107850	Cre02.g107850.t1.1	MOB1	Cytokinesis-related protein	MOB1 proteins are involved in mitotic exit and regulation of cytokinesis.	31.8212	29.1158	59.1403	58.9778	28.3489	28.547	45.9081	43.2045	1.05655	2.55124e-25	0.867626	1.04539e-15	-0.287705	0.051358	-0.517501	0
Cre02.g108000	Cre02.g108000.t1.2				0	0.307204	3.1803	2.53988	0.651088	0.363667	1.46268	1.55775	2.07585	1.33273e-07	1.03277	0.0323465	0.669003	0.561877	-0.749291	0.071854
Cre02.g109450	Cre02.g109450.t1.1				9.51382	9.78352	20.6765	19.2364	6.08023	6.09562	4.90335	5.06848	1.01161	2.75988e-06	-0.0343601	1	-0.68766	0.020321	-1.83729	0
Cre02.g109850	Cre02.g109850.t1.2				4.67159	6.25787	13.1174	11.4974	5.81328	6.81876	7.99903	8.39965	1.06652	1.65482e-05	0.533195	0.091089	0.011243	1	-0.626602	0.014281
Cre02.g113000	Cre02.g113000.t1.1				18.8646	21.3279	51.8889	49.3984	24.5247	28.6054	60.5641	55.6308	1.33514	3.10249e-16	1.30527	3.57029e-19	0.176501	0.577259	0.074554	0.803632
Cre02.g113050	Cre02.g113050.t1.1				11.2227	11.4711	31.8813	29.1436	7.16332	6.20624	23.2016	20.6899	1.37368	1.11415e-13	1.72434	8.67928e-16	-0.779898	0.005133	-0.561574	0.002056
Cre02.g114900	Cre02.g114900.t1.2	ANK23	predicted protein	protein of unknown function with ankyrin repeats	0.94985	0.925367	4.42701	5.17129	1.1207	1.16391	0.826109	1.31108	1.71073	1.14104e-09	0.0797815	0.99651	0.04747	1	-1.79574	0
Cre02.g115800	Cre02.g115800.t1.2				37.0577	34.9123	85.5025	93.2995	16.9367	11.2716	60.5641	59.9965	1.31619	4.21786e-16	2.09191	8.98245e-25	-1.29735	0	-0.655436	2.3e-05
Cre02.g115950	Cre02.g115950.t1.1				4.08237	3.46726	11.133	11.4291	3.51987	2.89731	28.1312	27.3761	1.41399	2.52565e-10	3.02253	8.61154e-68	-0.32989	0.441978	1.12017	0
Cre02.g116650	Cre02.g116650.t1.1				35.1636	45.2273	83.3179	89.8132	48.5974	44.4267	107.383	108.325	1.19706	1.19875e-18	1.42246	1.90227e-45	0.015867	1	0.194779	0.088787
Cre02.g118200	Cre02.g118200.t1.1				16.3415	17.3568	45.7377	42.7754	8.1545	9.56491	36.2263	40.596	1.43751	2.4881e-28	2.21917	1.87606e-47	-1.00935	0	-0.317442	0.012244
Cre02.g120600	Cre02.g120600.t1.1				0.562714	0.54821	8.51291	9.1908	5.85086	3.77213	9.91049	7.48101	2.43703	6.3906e-17	0.938375	0.00794295	1.61025	9.2e-05	-0.138652	0.831147
Cre02.g121600	Cre02.g121600.t1.1	_	protein kinase	putative protein kinase	3.96341	4.55755	10.2465	8.7805	15.2363	13.8814	12.5451	12.0082	1.13556	3.97629e-09	0.00016365	1	1.42314	0	0.239234	0.258136
Cre02.g122500	Cre02.g122500.t1.2	FAP139	Flagellar Associated Protein	Flagellar Associated Protein, found in the flagellar proteome [PMID: 15998802]	8.12983	7.7317	1.59728	1.79009	5.7096	6.19485	1.79574	2.36245	-1.68493	6.77574e-14	-1.10623	1.34155e-05	-0.554562	0.008296	0.131298	0.901053
Cre02.g122550	Cre02.g122550.t1.1	_	predicted protein	expressed protein of unknown function	6.55139	8.19092	15.117	16.1239	5.02435	4.43892	8.07205	6.94877	1.07698	3.7117e-08	0.786421	0.00319865	-0.688763	0.01007	-1.08424	0
Cre02.g123000	Cre02.g123000.t1.2				2.85198	1.74941	5.32662	7.94081	2.8976	2.19276	9.55429	10.7739	1.24006	0.00490335	1.89941	2.31287e-15	-0.025121	1	0.467445	0.1646
Cre02.g123700	Cre02.g123700.t1.2				1.81068	1.17601	5.11882	5.60418	2.33665	2.61029	8.39892	9.07639	1.49162	1.97603e-08	1.80267	1.8788e-16	0.385561	0.416748	0.534767	0.02184
Cre02.g123750	Cre02.g123750.t1.1				1.17364	2.09621	5.73904	5.95202	1.90401	1.35354	6.97508	7.16201	1.187	0.000978161	1.64455	1.86943e-06	-0.090832	0.994696	0.124296	0.914765
Cre02.g123900	Cre02.g123900.t1.2				22.6031	21.6498	9.35025	8.9906	9.22629	6.91191	6.42045	7.23171	-1.05032	5.15445e-13	0.0138323	1	-1.55689	0	-0.506174	0.021039
Cre02.g126100	Cre02.g126100.t1.1	RABB1	small Rab-related GTPase	Expressed Protein. Similar to the RabB/Rab2 type GTPase, involved in vesicle trafficking in the ER-Golgi system. Identical to YPTC4 [gi|2500074|sp|Q39570|YPT4_CHLRE, PMID: 7789809]. Found in the flagellar proteome [PMID: 15998802]	155.524	152.741	313.018	305.699	137.783	132.193	233.353	238.442	1.13086	4.71237e-84	1.04078	9.92076e-64	-0.388655	0	-0.508008	0
Cre02.g127850	Cre02.g127850.t1.2				4.94006	6.54038	0.929104	2.04053	5.60444	7.01205	1.87283	2.09809	-1.22735	0.000245988	-1.09691	0.000856772	-0.050511	0.999732	0.243265	0.875963
Cre02.g128150	Cre02.g128150.t1.1				25.1822	20.7169	53.7455	56.3426	18.5698	16.9413	37.3544	35.0031	1.33057	4.53588e-27	1.21111	1.17597e-17	-0.523592	0.006953	-0.706129	0
Cre02.g128450	Cre02.g128450.t1.1				4.49263	4.87161	10.1367	9.68469	10.7167	10.5428	37.1369	36.2366	1.12906	3.84496e-14	1.99345	2.33931e-127	0.916985	0	1.73541	0
Cre02.g129600	Cre02.g129600.t1.2				5.57492	8.78872	16.3567	16.3287	3.31873	4.29605	8.81573	8.57138	1.19798	2.56345e-10	1.25263	2.08648e-07	-0.892199	0.059829	-0.959641	0
Cre02.g132300	Cre02.g132300.t1.2	DNJ12	DnaJ-like protein	DnaJ-like protein; probably cytosolic, since there seems no extension N-terminal to J-domain (pfam00226)	1.83898	1.91101	5.00209	5.59574	3.95979	3.49942	4.79821	4.16823	1.30082	8.51824e-08	0.451187	0.108397	0.622763	0.045156	-0.327397	0.258205
Cre02.g133050	Cre02.g133050.t1.2				28.9183	27.5085	5.87816	5.61562	15.0884	14.7484	5.69457	4.16206	-1.86785	3.11462e-24	-1.19952	4.08597e-07	-1.036	0	-0.294805	0.544153
Cre02.g133300	Cre02.g133300.t1.1				6.29889	7.23465	14.1646	14.3008	7.62743	8.88933	5.07464	4.97097	1.10845	6.84444e-12	-0.429601	0.0645687	0.07537	0.889463	-1.51626	0
Cre02.g135050	Cre02.g135050.t1.2				12.5669	12.6466	3.41867	4.44931	13.4423	13.3783	9.72869	8.78846	-1.22992	7.68903e-07	-0.262827	0.40522	-0.101161	0.831583	0.944805	0.001299
Cre02.g136800	Cre02.g136800.t1.1	LCR1	low-CO2 response regulator	Myb-DNA binding transcriptional factor induced under low CO2 stress condition [PMID: 15155888]; regulates CO2-responsive genes, Cah1, Lci1, and Lci6; regulated by CCM1 [PMID: 15235119]	23.6557	22.6208	9.12384	9.53079	29.5069	27.5585	6.529	7.38143	-1.07915	1.45163e-12	-1.69446	1.50986e-30	0.09463	0.654675	-0.49926	0.032836
Cre02.g137700	Cre02.g137700.t1.1				9.66922	9.3065	921.68	903.201	0.206176	0.100765	1.72244	2.13273	6.48988	0	1.79986	3.87906e-05	-3.34718	0	-8.42042	0
Cre02.g137750	Cre02.g137750.t1.2				1.77353	2.39975	19.0615	19.2232	1.65659	2.13061	1.11402	1.20253	2.72478	1.29561e-42	-0.306127	0.655584	-0.224758	0.731414	-3.4665	0
Cre02.g137800	Cre02.g137800.t1.1				8.04074	7.90739	17.3875	16.6326	10.5386	10.3668	19.5283	20.2355	1.12737	9.50247e-13	1.1185	9.98285e-16	0.170076	0.556293	0.101629	0.674746
Cre02.g137850	Cre02.g137850.t1.1				63.2922	66.1555	210.972	221.673	23.6022	25.4398	94.9214	91.7511	1.84557	1.854e-158	2.11161	1.44338e-96	-1.53173	0	-1.3201	0
Cre02.g139450	Cre02.g139450.t1.1				1.51795	1.92247	11.1341	10.5963	1.47756	1.70686	0.396059	0.793982	1.95089	5.31603e-13	-0.619099	0.359582	-0.169567	0.88482	-2.96468	0
Cre02.g139500	Cre02.g139500.t1.1				5.03392	5.99398	55.1288	52.8103	8.41409	8.95019	6.08073	6.82644	3.03914	3.55384e-87	-0.159185	0.762253	0.369784	0.294444	-2.96321	0
Cre02.g140000	Cre02.g140000.t1.2				45.9049	44.1598	127.641	132.023	35.1098	34.0194	109.141	110.202	1.6299	7.68579e-100	1.8768	4.15031e-118	-0.563981	1e-06	-0.360097	0
Cre02.g143650	Cre02.g143650.t1.1				36.9678	35.3409	68.786	66.4347	25.0157	22.4001	25.7043	24.4722	1.01309	5.65107e-29	0.316741	0.0346608	-0.780388	0	-1.51693	0
Cre02.g144050	Cre02.g144050.t1.1	ELG34	exostosin-like glycosyltransferase	belongs to the family of exostosin-like glycosyltransferases	15.1624	17.4457	35.4738	37.5506	15.4992	18.2026	40.8118	44.2124	1.21147	3.45589e-17	1.51399	9.2844e-31	-0.142812	0.641235	0.096234	0.652009
Cre02.g144650	Cre02.g144650.t1.1				24.9375	27.5485	3.47049	3.18829	2.75841	2.31108	0.3873	0.582317	-2.15221	1.23895e-19	-0.999387	0.0701302	-2.69352	0	-1.44605	0.002066
Cre02.g144850	Cre02.g144850.t1.1	CGLD26b	predicted protein	Conserved expressed protein; alternatively spliced isoform CGLD26b; contains a coiled-coil region; probably chloroplast targeted	15.7957	21.2062	6.35819	6.72345	10.5684	11.6633	5.86374	9.73992	-1.09128	0.000174586	-0.257646	0.705149	-0.797005	0.005294	0.079158	0.947931
Cre02.g145750	Cre02.g145750.t1.1	AOT2	amino acid transporter	belongs to AAAP family of amino acid/auxin permeases; most similar to plant relatives; linked to closely related AOT1	2.15091	2.57172	0.268923	0.437495	1.29774	1.43763	0.0850321	0.0852321	-1.29328	0.000738451	-1.54636	0.00186273	-0.638201	0.118595	-0.654755	0.430763
Cre02.g146150	Cre02.g146150.t1.2				1.68019	1.89264	0.433268	0.281943	2.04435	2.6341	0.456657	0.457731	-1.2826	0.00024312	-1.50213	1.22481e-05	0.138609	0.827812	0.140322	0.998892
Cre02.g146850	Cre02.g146850.t1.1				2.33398	2.14389	6.23642	8.23589	4.36671	3.69152	12.5275	12.7314	1.48496	5.71154e-07	1.74608	1.28004e-23	0.51159	0.112289	0.656537	0.000273
Cre02.g147450	Cre02.g147450.t1.2				6.79877	6.9246	2.1723	1.93601	4.28429	5.07877	0.895918	0.449013	-1.18859	2.15543e-05	-1.78962	3.61159e-07	-0.626394	0.024252	-1.10638	0.01472
Cre02.g147600	Cre02.g147600.t1.2				4.78186	3.70963	0.893105	0.911389	2.54672	2.29785	1.23227	0.77198	-1.60508	2.86623e-09	-0.854224	0.0102374	-0.861426	0.000543	0.001033	1
Cre03.g151400	Cre03.g151400.t1.2				3.7429	3.71589	11.766	11.0382	2.8074	2.71331	6.75862	6.0287	1.62059	9.59331e-31	1.3502	2.96665e-15	-0.562267	0.012981	-0.921906	0
Cre03.g153700	Cre03.g153700.t1.2				3.49408	4.14865	1.10124	1.07492	4.348	4.62781	2.75399	2.85566	-1.03965	0.00318066	-0.345955	0.451108	0.025078	1	0.856521	0.049765
Cre03.g155100	Cre03.g155100.t1.1				0.107795	0.105017	3.45919	2.60475	1.24005	0.186478	4.96888	4.98057	2.03021	1.32381e-08	2.25875	6.45978e-11	0.653832	0.538403	0.495548	0.199885
Cre03.g156250	Cre03.g156250.t1.1				231.123	233.707	483.555	493.577	172.961	166.824	431.313	449.176	1.20082	1.44159e-130	1.60736	3.87771e-213	-0.647201	0	-0.269351	0
Cre03.g159700	Cre03.g159700.t1.2				2.52979	2.33487	7.56884	7.26882	3.06337	3.33985	2.54763	2.2054	1.25808	1.20247e-05	-0.136036	0.917614	0.129601	0.913664	-1.40432	3e-06
Cre03.g159950	Cre03.g159950.t1.2				2.01357	1.12095	4.044	4.8913	2.63029	2.23928	2.25161	1.33743	1.16624	0.000181	-0.167733	0.900123	0.312331	0.609166	-1.15176	0.000468
Cre03.g161650	Cre03.g161650.t1.1				0.754043	1.17537	3.18024	4.31896	4.53732	3.78287	7.73856	10.3862	1.1533	0.00204784	1.12424	0.000220363	1.12044	0.004165	0.950927	0.003384
Cre03.g161700	Cre03.g161700.t1.2				19.1751	18.9266	5.32057	6.32244	21.2101	21.3869	6.58305	5.49878	-1.2024	6.84734e-06	-1.32413	6.31636e-07	-0.036823	1	-0.050494	1
Cre03.g162800	Cre03.g162800.t1.1	LCI1	low-CO2-inducible membrane protein	Low-CO2-inducible gene encoding 21 kDa transmembrane protein; SOSUI prediction: signal peptide in N-terminal end and 3 transmembrane helices. Regulated by CO2 through MYB-transcription factor LCR1 [PMID: 15155888] and CCM1 [PMID: 15235119]	227.027	217.7	53.981	61.4729	220.236	239.001	27.3484	27.996	-1.75564	4.18755e-90	-2.72735	4.79715e-118	-0.155818	0.072702	-1.12227	0
Cre03.g163400	Cre03.g163400.t1.2				3.02615	2.14411	11.7289	11.8179	3.89504	4.52115	3.34972	2.75803	1.76407	2.011e-12	-0.16825	0.842463	0.355508	0.468541	-1.73424	0
Cre03.g165471	Cre03.g165471.t1.1				193.529	178.44	47.8455	47.9394	22.0184	18.2341	12.3232	12.6535	-1.72162	2.72911e-49	-0.370087	0.314933	-3.1543	0	-1.83041	0
Cre03.g169300	Cre03.g169300.t1.1				2.83758	3.21273	13.1491	12.9035	8.07586	9.2206	41.2876	40.4488	1.91423	3.19827e-23	2.3908	3.91337e-95	1.1119	1e-06	1.48462	0
Cre03.g172950	Cre03.g172950.t1.1	CBF5	centromere/microtubule binding protein	Centromere/microtubule binding protein (centromere binding factor 5), putative; Pseudouridine synthase, putative (PSI1); Homologue of AtNAP57 and yeast CBF5, pseudouridine synthases involved in rRNA biogenesis and localized in the nucleolus (TruB) [PMID: 11833778]	27.4136	23.9839	8.0825	11.834	16.0771	17.7605	5.14245	5.34199	-1.13785	3.57852e-07	-1.30961	4.99792e-11	-0.756024	0	-0.906736	0.021366
Cre03.g173350	Cre03.g173350.t1.1	ANK22b	predicted protein	protein of unknown function with ankyrin repeats; this is ANK22b, the longer, less abundant splicing isoform (PMID: 12836870)	29.3712	28.3454	58.0311	59.4828	84.9269	81.105	139.717	145.576	1.11116	7.86049e-22	1.0141	1.9689e-48	1.27454	0	1.14392	0
Cre03.g174950	Cre03.g174950.t1.2				2.29643	2.85138	6.72941	6.7701	2.35087	1.90843	6.07012	5.41707	1.33504	5.7387e-12	1.50573	1.59687e-13	-0.389149	0.231291	-0.334127	0.110896
Cre03.g179100	Cre03.g179100.t1.1	_	ubiquitin fusion degradation protein	_	2.40383	1.61003	7.98947	7.12626	2.26009	3.24878	13.5893	15.8479	1.40934	2.44204e-06	2.20832	2.3425e-19	0.157546	0.882719	0.749435	0.002182
Cre03.g179200	Cre03.g179200.t1.1				1.09987	0.714351	3.52954	3.19911	2.02767	1.82342	0.876874	1.11865	1.28161	0.000115894	-0.476416	0.396621	0.540575	0.274366	-1.36021	0.000131
Cre03.g180250	Cre03.g180250.t1.1	_	Myo-inositol-1-phosphate synthase	inositol-3-phosphate synthase activity	121.282	122.107	239.913	247.411	147.959	153	342.277	345.591	1.12833	2.45308e-90	1.42991	1.72788e-210	0.101644	0.255028	0.375983	0
Cre03.g180450	Cre03.g180450.t1.1	FAP215	Flagellar Associated Protein	Conserved uncharacterized Flagellar Associated Protein; found in the flagellar proteome [PMID: 15998802]	46.8204	50.038	13.2849	14.3223	24.5909	24.2239	11.6614	12.2544	-1.57353	2.49568e-36	-0.742463	4.41099e-06	-1.14479	0	-0.304446	0.19181
Cre03.g181450	Cre03.g181450.t1.2				0.107215	0	1.27792	1.15143	0.569245	0.834629	1.11897	0.747733	1.47375	0.00217587	0.351231	0.675491	1.05871	0.102916	-0.30946	0.748724
Cre03.g182050	Cre03.g182050.t1.1				34.3066	32.9695	86.5214	89.6959	48.5398	50.5019	121.452	123.602	1.49052	8.04435e-74	1.53472	1.13465e-119	0.344809	0.001615	0.353204	0
Cre03.g185100	Cre03.g185100.t1.2				8.95801	8.72712	22.9353	23.7486	10.1704	12.4266	27.342	28.1431	1.32333	3.46473e-11	1.42325	3.39139e-15	0.120586	0.82281	0.12232	0.696646
Cre03.g185850	Cre03.g185850.t1.2	_	PfkB-type carbohydrate kinase	PfkB-type carbohydrate kinase family protein, ribokinase; strong similarity to proteins in plants and bacteria - cd01168, adenosine_kinase.	5.61579	6.56526	17.4128	15.4432	17.4382	14.9256	30.3709	34.6259	1.37444	2.58884e-13	1.20256	8.89326e-15	1.07088	0	0.831305	0
Cre03.g186150	Cre03.g186150.t1.1				30.8709	31.1063	63.7255	64.8867	27.0054	27.7702	70.8818	72.4326	1.12794	1.98646e-19	1.57356	2.8717e-40	-0.354998	0.056487	0.035414	0.930349
Cre03.g186200	Cre03.g186200.t1.1	PCT1	Phosphatidate cytidylyltransferase	Phosphatidate cytidylyltransferase (CDP-diglyceride synthetase)	38.0644	34.6735	78.9975	81.2912	35.5072	31.9734	90.4726	91.1647	1.23443	1.51194e-34	1.63665	1.0221e-67	-0.297257	0.052227	0.059765	0.714653
Cre03.g188500	Cre03.g188500.t1.1	VPS46	subunit of the ESCRT-III complex	Expressed Protein. Similar to yeast Did2p/Vps46p, SNF7-domain protein, component of the ESCRT-III complex involved in the ubiquitin-mediated internalization into the multi-vesicular bodies (late endosomes)	32.4682	33.1297	75.5195	80.597	41.887	35.4743	123.06	124.84	1.32392	6.6955e-31	1.88465	2.69463e-91	0.028402	0.987815	0.539631	0
Cre03.g190000	Cre03.g190000.t1.1				2.97151	3.1017	6.42198	6.39516	4.31987	5.14048	1.41526	2.09705	1.00198	2.66408e-05	-0.994255	0.000790727	0.35516	0.287474	-1.7011	0
Cre03.g191850	Cre03.g191850.t1.1				41.0687	44.3635	90.1367	78.4609	26.3618	19.8781	37.3841	43.2227	1.06306	2.21831e-13	0.993349	1.17835e-06	-1.01455	0	-1.14715	0
Cre03.g192450	Cre03.g192450.t1.2	_	predicted protein	Protein of unknown function; possible guanylate or adenylate cyclase, although the homology only appears to be in a single domain	0.954933	0.950994	0.194566	0.208908	0.845021	0.734205	0.221475	0.295994	-1.34743	2.49698e-05	-1.00261	0.00767569	-0.374236	0.31751	0.140696	0.956076
Cre03.g194750	Cre03.g194750.t1.2				20.9049	20.9165	81.8483	79.0497	46.8302	48.8701	70.2691	65.6731	1.94777	1.73746e-52	0.72894	2.36793e-10	0.922061	0	-0.355684	0.001608
Cre03.g195500	Cre03.g195500.t1.1				10.9984	12.1596	40.3362	33.5108	14.1066	13.1474	46.9681	50.3105	1.66178	7.49434e-15	1.98856	1.83879e-55	0.02911	1	0.275792	0.104263
Cre03.g196050	Cre03.g196050.t1.1				3.48179	2.66518	10.2611	9.1256	2.86097	4.94766	11.4639	9.32279	1.17622	0.000318898	1.27995	0.000108031	0.067798	1	-0.019779	1
Cre03.g197300	Cre03.g197300.t1.2				2.32381	2.01917	6.79497	8.48748	2.44538	3.04218	13.9291	14.2356	1.6074	4.88932e-11	2.37929	1.13263e-42	0.10108	0.912828	0.731568	7e-06
Cre03.g197750	Cre03.g197750.t1.1	GPX3	Glutathione peroxidase	Homologous to glutathione peroxidase from other organisms. Possibly mitochondrial (prediction programs)	8.48479	7.55757	1.55588	2.82045	9.43887	13.6296	4.84934	4.22674	-1.07354	0.0034284	-0.849527	0.0176796	0.236019	0.572227	0.628466	0.25903
Cre03.g200000	Cre03.g200000.t1.1	_	calcium-binding protein	Similar to C. reinhardtii putative programmed cell death protein 6 but has only 2 EF hand domains (IPR002048)	9.48233	10.0077	20.2861	21.0389	10.8383	11.1067	23.1948	22.216	1.02939	4.16917e-06	1.16442	2.32003e-08	-0.02599	1	0.014857	1
Cre03.g201300	Cre03.g201300.t1.2	SSA10	dopamine beta-monooxygenase-like protein	identified by comparative genomics as being present only in organisms having cilia, including non-motile cilia; may have role in sensing, structure and/or assembly (SSA)	17.5314	18.4861	70.5365	71.3429	14.236	13.2016	63.8602	64.2802	2.02757	2.90036e-86	2.38622	5.78684e-110	-0.55153	0.001641	-0.263279	0.002978
Cre03.g207600	Cre03.g207600.t1.1				5.90018	5.7481	1.13226	1.4736	4.37113	3.7979	1.19338	1.07657	-1.28953	8.11953e-05	-1.08428	0.00719221	-0.546916	0.113924	-0.179798	0.923231
Cre03.g207800	Cre03.g207800.t1.1				6.18569	5.2958	24.4045	24.8278	10.7816	13.1328	63.091	62.9126	1.84021	5.53478e-18	2.48048	6.00413e-65	0.677662	0.0231	1.18556	0
Cre03.g210150	Cre03.g210150.t1.1				13.8915	14.2294	80.5682	81.7688	10.1853	11.6036	91.4761	89.3385	2.57085	1.97915e-173	3.21151	1.88084e-284	-0.531782	0.002493	0.035259	0.80794
Cre03.g210750	Cre03.g210750.t1.2				9.50284	8.05035	21.7821	22.0628	6.52008	7.7431	9.40278	7.98415	1.3656	2.21691e-23	0.492759	0.0174013	-0.45451	0.032845	-1.396	0
Cre03.g211100	Cre03.g211100.t1.1				6.04518	11.1747	22.4548	19.1437	10.8359	14.614	37.3428	34.0524	1.25652	3.02007e-05	1.63492	4.02961e-25	0.341962	0.688264	0.630866	7.7e-05
Cre03.g211283	Cre03.g211283.t1.1				6.02459	5.31906	12.3421	12.8054	9.32954	9.52645	18.7485	20.4338	1.11748	2.65234e-08	1.22169	8.5532e-15	0.461443	0.075777	0.493115	0.003827
Cre03.g211450	Cre03.g211450.t1.1				30.8892	28.4261	9.90834	10.3969	22.4728	20.798	10.9654	10.1276	-1.30735	1.21251e-20	-0.751284	1.61467e-06	-0.629845	1e-06	-0.061129	0.937026
Cre03.g211500	Cre03.g211500.t1.2				0.584484	0.355887	0.0334934	0.0326931	0.290931	0.284376	0.0635427	0.127384	-1.22487	0.00555163	-0.618894	0.400953	-0.467855	0.3776	0.384194	0.798456
Cre04.g212600	Cre04.g212600.t1.1				9.57127	8.56338	20.9539	21.6769	14.1737	12.8406	24.4635	21.4559	1.15338	1.54257e-07	0.918603	6.63672e-06	0.308745	0.37458	-0.01433	1
Cre04.g213150	Cre04.g213150.t1.1				14.4298	14.0579	29.9538	30.1086	11.1907	9.04538	27.4971	29.1872	1.15018	2.35706e-20	1.66266	5.94995e-38	-0.6496	0.000193	-0.199185	0.144906
Cre04.g213450	Cre04.g213450.t1.1	VPS2A	subunit of the ESCRT-III complex	Expressed Protein. Similar to yeast Vps2p/Did4p, SNF7-domain protein, component of the ESCRT-III complex involved in the ubiquitin-mediated internalization into the multi-vesicular bodies (late endosomes)	51.6286	61.3053	121.291	127.24	51.9351	52.8009	170.33	178.392	1.24751	8.79743e-44	1.94867	4.22356e-145	-0.296073	0.07367	0.365314	0
Cre04.g214250	Cre04.g214250.t1.2	AGO3	Argonaute-like protein	Argonaute-like protein presumably involved in posttranscriptional gene silencing/RNA interference, ChromDB AGO3402	8.21103	7.79428	21.6201	22.0456	8.01117	10.6533	11.2614	11.1961	1.42522	2.21628e-17	0.481368	0.0408272	0.005372	1	-1.01895	0
Cre04.g214400	Cre04.g214400.t1.2				1.48018	1.70422	5.5519	3.73325	4.16759	4.65564	8.30927	7.9769	1.05909	0.00281823	0.949806	0.000726804	0.834971	0.027237	0.604739	0.065884
Cre04.g214750	Cre04.g214750.t1.2	VMPL2	R-SNARE protein, VAMP-like family	Expressed Protein. Contains R-SNARE domain distantly similar to VAMP4, not found in land plants. Part of 2 member gene family on same scaffold separated by one gene (<-VMPL1, IFM1, <-VMPL2)	4.2364	3.53761	14.5658	17.0613	6.15873	5.62736	12.6326	12.2666	1.7164	9.27291e-14	1.14863	2.28891e-06	0.297562	0.522211	-0.422136	0.078357
Cre04.g215300	Cre04.g215300.t1.2				8.72361	7.60415	32.8355	36.9818	17.6059	16.1502	23.0277	20.4134	1.97367	5.42489e-31	0.567266	0.00281633	0.731967	0.001773	-0.767043	0
Cre04.g215600	Cre04.g215600.t1.1				11.5709	13.1173	37.6137	37.2797	32.7651	28.5694	84.7165	87.8503	1.5299	4.42844e-17	1.67532	1.20118e-44	0.979654	2e-06	1.04948	0
Cre04.g217500	Cre04.g217500.t1.1				2.61543	2.68958	9.45879	9.10273	2.05724	1.88521	2.65382	1.52004	1.42094	2.15599e-07	0.18875	0.819538	-0.390267	0.459194	-1.81563	0
Cre04.g218800	Cre04.g218800.t1.2	THB3	truncated hemoglobin	Truncated hemoglobin, plastid-located. Orthologous to C. eugametos LI637 and LI410 [PMID: 8177215, PMID: 10563822]; Truncated hemoglobins (trHbs) are a family of oxygen-binding heme proteins found in cyanobacteria, other eubacteria and unicellular eukaryotes (Paramecium, Tetrahymena); the C. eugametos orthologue has been localized to the plastid, particularly in the pyrenoid and the thylakoid reg…	4.15736	2.38858	7.42803	8.10915	5.65978	4.79462	3.05949	2.69497	1.11422	2.78704e-05	-0.500654	0.177751	0.394875	0.403779	-1.30791	1e-06
Cre04.g219950	Cre04.g219950.t1.1				1.73829	2.50636	4.59009	5.04045	10.2753	9.5626	9.85716	9.51666	1.04185	0.000114246	0.198955	0.42266	1.71823	0	0.818011	7.1e-05
Cre04.g220500	Cre04.g220500.t1.1				145.017	147.632	344.502	352.111	179.985	170.02	880.171	872.496	1.36269	2.92786e-75	2.54874	0	0.053174	0.792156	1.20511	0
Cre04.g220850	Cre04.g220850.t1.1				2.87327	2.63926	9.86023	7.20009	2.17934	2.20124	4.64093	3.64991	1.42632	2.08888e-05	0.941865	0.00178677	-0.391869	0.348537	-1.03096	0.00279
Cre04.g221850	Cre04.g221850.t1.1				12.4307	9.64118	25.1183	28.8384	30.757	27.663	65.1825	69.7547	1.30457	1.90062e-13	1.41761	3.01694e-46	1.11511	0	1.17504	0
Cre04.g223100	Cre04.g223100.t1.1	CAH1	carbonic anhydrase	Carbonate dehydratase 1 in Chlamydomonas reinhardtii, also known as CA1; gi:115447; Carbonic anhydrase 1 precursor (Carbonate dehydratase 1) (CA1); alpha type - Carbonic anhydrase 1 localized in the periplasmic space and low-CO2 inducible gene regulated by LCR1 [PMID: 15155888] and CCM1 [PMID: 11287669, 15235119]	8072.32	8091.41	2302.97	2253.53	4994.35	5020.27	1834.77	1851.88	-1.68553	0	-1.19575	0	-0.893379	0	-0.42496	0
Cre04.g224400	Cre04.g224400.t1.2				1.38367	1.34801	4.14748	4.096	2.91975	3.17618	2.40683	2.22691	1.34041	1.36644e-07	-0.128735	0.844987	0.737787	0.017575	-0.831891	0.001446
Cre04.g224500	Cre04.g224500.t1.2	_	PDR-like ABC transporter	_	2.2375	1.98606	9.11772	8.81085	2.90394	2.7525	4.32446	5.46164	1.91327	2.29901e-24	0.919034	7.73917e-05	0.178293	0.721862	-0.940314	0
Cre04.g224800	Cre04.g224800.t1.1	VAMP74	R-SNARE protein, VAMP72-family	Expressed Protein. Similar to VAMP7 R-SNAREs, involved in Golgi/PM and Golgi/endosomal trafficking; most similar to VAMP72-family of land plants, part of 4-member gene family in Chlamydomonas all on same scaffold and in 2 tandem arrays (74-> <-71; and <-73 72->), location and order of gene family members are syntenic in Volvox	25.7727	27.0398	155.868	152.883	26.3149	31.0093	131.186	121.989	2.57919	8.67558e-160	2.3275	1.37561e-113	-0.082918	0.833203	-0.402873	0
Cre04.g225050	Cre04.g225050.t1.2	_	predicted protein	Conserved expressed protein of unknown function; has homologues in viridiplantae and Cyanobacteria	68.0604	65.3852	132.172	130.564	90.2006	94.8456	350.641	359.57	1.09015	1.93625e-39	2.16686	0	0.261626	0.014541	1.30592	0
Cre04.g228550	Cre04.g228550.t1.2				0.731147	0.735279	0.194622	0.168863	0.646992	0.897621	0.492308	0.472905	-1.1021	0.00246219	-0.319462	0.521939	-0.106406	0.954058	0.829965	0.081786
Cre05.g231700	Cre05.g231700.t1.2				13.0126	12.3184	30.2773	31.7511	8.79909	9.34412	22.101	23.9723	1.31418	4.61555e-18	1.47407	3.92672e-18	-0.601829	0.007901	-0.528416	0.000281
Cre05.g232100	Cre05.g232100.t1.1				7.85635	6.08829	2.29194	1.27838	10.2701	8.49431	4.1929	3.58013	-1.16957	0.000590272	-0.823198	0.012535	0.182978	0.72628	0.697112	0.164061
Cre05.g233600	Cre05.g233600.t1.2				5.86407	6.07914	2.20578	2.22035	8.94791	9.78675	3.13854	2.851	-1.12941	5.93999e-09	-1.31481	2.37565e-16	0.418965	0.009652	0.280648	0.404394
Cre05.g233700	Cre05.g233700.t1.2				26.0997	21.3672	4.02185	5.88862	13.5857	16.1252	2.8613	3.05923	-1.67542	2.33672e-12	-1.62812	3.57707e-08	-0.768485	0.000405	-0.592341	0.196665
Cre05.g234100	Cre05.g234100.t1.1	CYP745A1	cytochrome P450	_	21.8991	22.9674	42.5134	42.6974	21.8503	23.3875	56.0698	59.1238	1.01228	6.61667e-17	1.54842	4.20103e-49	-0.180603	0.381863	0.308423	0.004225
Cre05.g234850	Cre05.g234850.t1.2				5.38229	4.78427	11.8148	12.2005	7.05728	7.30604	6.93625	6.71283	1.2876	1.39702e-20	0.163228	0.480783	0.275393	0.191372	-0.900505	0
Cre05.g235900	Cre05.g235900.t1.2				0.533494	0.80849	1.90223	2.12202	1.20645	1.28181	1.44354	1.44693	1.09901	0.00154688	0.343056	0.529087	0.432939	0.422238	-0.468024	0.270452
Cre05.g237400	Cre05.g237400.t1.1	DAE1	diaminopimelate epimerase	putative diaminopimelate (DAP) epimerase (EC:5.1.1.7); lysine biosynthesis pathway (dapF); organelle (mitochondria) targeting predicted by Target-P; plastid location expected based on homology	12.3873	14.247	34.8614	32.0267	20.8575	17.8577	19.4523	18.8982	1.31679	1.8187e-14	0.218016	0.436957	0.297196	0.277772	-0.869643	0
Cre05.g238650	Cre05.g238650.t1.2				38.0231	37.4708	10.2252	8.88057	35.3562	33.3443	5.57526	6.12424	-1.72651	2.88183e-40	-2.17866	1.5214e-51	-0.329682	0.003864	-0.750193	0.000722
Cre05.g239500	Cre05.g239500.t1.1				9.27358	11.064	20.1476	21.4102	24.4402	23.0758	45.1783	44.9331	1.1013	4.94848e-16	1.14693	3.86945e-39	0.972379	0	0.978086	0
Cre05.g240000	Cre05.g240000.t1.1				15.4088	15.8364	28.8766	34.3998	18.1304	18.3077	47.4204	57.1269	1.04038	2.63401e-09	1.67302	1.29344e-14	0.016687	1	0.582372	0.008614
Cre05.g241600	Cre05.g241600.t1.1	_	hypothetical protein	_	84.3258	84.7668	198.016	198.846	71.1202	75.2599	279.479	268.808	1.34838	7.53821e-92	2.12935	1.32e-283	-0.402701	1.7e-05	0.344265	0
Cre05.g242600	Cre05.g242600.t1.1				27.6999	28.1143	61.9443	57.7	50.5607	49.338	113.322	114.261	1.19707	8.78492e-35	1.41577	9.80399e-95	0.61637	0	0.800243	0
Cre05.g245950	Cre05.g245950.t1.1	DRP1	Dynamin-related GTPase	Expressed Protein. Similar to Arabidopsis DRP1 group, a Dynamin-type GTPase.	113.729	114.703	210.686	215.997	73.8295	75.3106	183.962	190.653	1.0318	5.97274e-95	1.56177	1.07329e-185	-0.807879	0	-0.306514	0
Cre05.g246400	Cre05.g246400.t1.1				4.96015	3.02019	8.81136	11.514	5.89804	6.16737	17.3907	14.729	1.14583	0.000289158	1.45035	6.94664e-11	0.315915	0.521937	0.495897	0.051195
Cre05.g247700	Cre05.g247700.t1.2				23.0923	25.4112	53.4251	54.8255	40.1276	36.8432	118.11	115.676	1.23912	1.94351e-27	1.81759	1.283e-115	0.441633	0.001814	0.977737	0
Cre05.g248400	Cre05.g248400.t1.1				11968.3	12311.7	4737.62	4703.9	3908.01	4011.13	1386.83	1388.33	-1.22043	0	-1.26254	1.82055e-211	-1.81594	0	-1.87931	0
Cre05.g248450	Cre05.g248450.t1.1				4642.74	4610.15	1677.17	1723.6	3615.39	3691.26	1224.84	1252.19	-1.29726	3.63659e-239	-1.30958	2.93223e-201	-0.54222	0	-0.573459	0
Cre06.g249750	Cre06.g249750.t1.2				3.96726	4.37356	8.51929	9.43694	4.89641	5.3279	8.35367	9.46549	1.01455	3.09025e-05	0.920794	0.000114504	0.072357	0.970787	-0.119934	0.805223
Cre06.g249800	Cre06.g249800.t1.1	_	unknown conserved protein	unknown conserved protein	7.41425	8.78109	18.9275	16.0031	8.74784	8.92797	21.8739	21.7986	1.06823	3.9561e-07	1.41574	4.31547e-14	-0.060569	0.966194	0.1946	0.46679
Cre06.g251600	Cre06.g251600.t1.1	EIF5Bb	eukaryotic initiation factor	eukaryotic translation initiation factor eIF5-like, eIF2 epsilon-like; probe 7 gene in PMID: 11805055.	123.513	130.999	253.937	253.859	79.7921	86.2041	204.262	204.318	1.12542	3.74094e-100	1.53184	5.89543e-151	-0.807944	0	-0.431494	0
Cre06.g255900	Cre06.g255900.t1.1				0.837473	0.979064	4.29997	3.44771	0.148216	0	1.16539	0.876102	1.17458	0.00198765	1.33946	0.0356324	-1.07066	0.074867	-1.29016	0.001919
Cre06.g256750	Cre06.g256750.t1.1	FAT1	acyl carrier protein thioesterase	acyl carrier protein thioesterase, putative; pfam01643, Acyl-ACP_TE, Acyl-ACP thioesterase. This family consists of various acyl-acyl carrier protein (ACP) thioesterases (TE). These enzymes terminate fatty acyl group extension via hydrolysing an acyl group on a fatty acid.	30.2765	29.9499	76.0183	68.1573	29.5739	32.9364	79.0979	75.7309	1.34686	1.25938e-30	1.52104	9.24096e-61	-0.144624	0.454889	-0.015073	1
Cre06.g258600	Cre06.g258600.t1.1				2.70154	2.63191	14.8618	12.5978	5.03284	4.79645	1.60762	1.73536	1.90533	2.79883e-15	-0.946955	0.0143847	0.479078	0.251936	-2.51198	0
Cre06.g258950	Cre06.g258950.t1.2				15.9283	14.8876	40.0317	36.6148	9.58745	8.53219	31.7148	32.0714	1.3853	2.55918e-34	1.97249	7.35886e-55	-0.894591	0	-0.375836	0.00036
Cre06.g259750	Cre06.g259750.t1.2				1.46453	1.01255	4.76469	3.88979	1.67221	1.47108	4.23209	4.40679	1.53564	1.86232e-10	1.47107	4.63264e-10	0.114431	0.939522	-0.106087	0.82583
Cre06.g260150	Cre06.g260150.t1.1				17.7401	15.9362	5.28096	6.18573	7.33945	8.9676	3.20604	5.22207	-1.08688	6.2292e-05	-0.557196	0.20306	-1.01933	7.2e-05	-0.435944	0.419443
Cre06.g261200	Cre06.g261200.t1.1	ERG25	sterol desaturase	similar to SUR2 proteins from Arabidopsis and yeast	1.55756	2.40257	17.0179	15.1011	3.44571	5.05211	5.19282	7.01548	2.41666	1.3902e-25	0.637861	0.0942542	0.612841	0.128045	-1.37025	0
Cre06.g262000	Cre06.g262000.t1.1				8.70448	8.61914	17.4009	19.9224	18.1832	19.8717	45.0507	44.4103	1.07665	9.43959e-08	1.41506	7.82791e-27	0.820384	0.000112	1.09619	0
Cre06.g263500	Cre06.g263500.t1.1				11.6554	11.5474	79.3331	82.0341	15.3834	16.7455	28.3492	29.9658	2.66619	7.04898e-78	1.02194	2.65075e-08	0.2266	0.514155	-1.53179	0
Cre06.g263550	Cre06.g263550.t1.1	LCI7	R53.5-related protein	Identified in the flagellar and basal body proteome [PMID: 15137946] and upregulated by deflagellation; putative R53.5-related protein. Low-CO2 and high-light inducible gene LCI7 revealed by cDNA array analyses; regulated by CCM1 [PMID: 15235119]	10.6803	11.2375	275.756	278.725	19.6582	19.9543	56.1054	66.293	4.45816	0	1.76539	3.56646e-19	0.555698	0.033434	-2.26807	0
Cre06.g263950	Cre06.g263950.t1.2	_	sodium/potassium-transporting ATPase alpha subunit	Related to mammalian sodium/potassium-transporting ATPase alpha-1 chain precursor	12.6788	12.6785	1.84358	1.69955	4.59654	4.49297	0.534353	0.730378	-2.30272	1.8988e-35	-2.03944	9.33639e-13	-1.53921	0	-1.15681	0.002192
Cre06.g264550	Cre06.g264550.t1.1	CGL81	predicted protein	Conserved expressed protein of unknown function; putative plastid protein	11.5482	12.6006	29.3646	28.1117	18.1218	16.3816	50.6207	49.3975	1.24535	7.83831e-13	1.69801	9.43016e-37	0.275714	0.322938	0.656108	1e-06
Cre06.g266250	Cre06.g266250.t1.1				41.7557	45.869	167.317	162.243	72.0747	65.8432	153.484	159.088	1.98961	8.91046e-115	1.4046	1.12122e-72	0.434189	0.000552	-0.194483	0.011161
Cre06.g267800	Cre06.g267800.t1.2	MITC8	mitochondrial substrate carrier protein	_	10.1337	7.66418	18.827	20.7638	11.0912	9.91859	14.6119	12.9027	1.14227	2.87829e-09	0.577225	0.0101791	0.039777	1	-0.603662	0.001626
Cre06.g269250	Cre06.g269250.t1.1				3.21088	4.37936	27.6731	26.7245	3.97783	3.74934	5.44553	5.17843	2.43848	8.04385e-33	0.548072	0.170106	-0.114459	0.911558	-2.20801	0
Cre06.g269300	Cre06.g269300.t1.1				3.14099	3.79444	49.5339	53.8599	3.6689	3.91225	4.6987	4.38117	3.49788	8.91873e-109	0.404878	0.337622	-0.051217	1	-3.34442	0
Cre06.g272200	Cre06.g272200.t1.1				4.31055	3.39955	0.941	0.183703	3.63277	4.61619	0.892617	0.894717	-1.24202	0.00389375	-1.1347	0.0125277	-0.069382	1	0.303604	0.930349
Cre06.g273750	Cre06.g273750.t1.2	_	CysA-like protein	CysA-like protein, chloroplast location proposed; present in thylakoid-enriched fraction based on mass spectrometric peptide identification [PMID: 17078018]	19.7423	16.1512	4.87336	5.66299	21.2775	21.6738	9.13552	8.93636	-1.37672	2.86144e-10	-0.928584	7.27014e-07	0.05784	0.934084	0.574375	0.054337
Cre06.g275600	Cre06.g275600.t1.1				9.59392	10.3851	21.5022	18.985	9.52729	10.6957	20.582	20.8163	1.04587	7.9092e-10	1.20021	1.78101e-13	-0.16567	0.630402	-0.081454	0.804213
Cre06.g276050	Cre06.g276050.t1.1				5.88774	6.98747	13.4466	14.4666	4.3575	2.87041	6.33106	6.06599	1.08908	8.68219e-08	0.878818	0.0027681	-0.84037	0.002989	-1.17323	0
Cre06.g278700	Cre06.g278700.t1.2				9.45204	11.3684	3.74468	3.13303	7.12499	7.67099	2.43576	2.54322	-1.15814	3.13054e-06	-1.07995	0.000296822	-0.596653	0.012973	-0.444607	0.336932
Cre06.g281250	Cre06.g281250.t1.1	CFA1	cyclopropane fatty acid synthase	Cyclopropane fatty acid synthase, uses AdoMet to introduce a methylene group into fatty acids	4.21573	4.64277	294.432	288.326	0.594717	0.739858	1.541	2.024	5.91874	0	1.15894	0.00184491	-2.10194	0	-7.10766	0
Cre06.g283900	Cre06.g283900.t1.1				0.845608	0.988575	2.86865	3.17849	7.48279	6.21706	35.6692	34.7211	1.17813	0.000439303	2.47671	4.05852e-79	1.95446	0	3.15929	0
Cre06.g287050	Cre06.g287050.t1.1				4.53757	4.65328	1.3138	1.06867	4.08575	3.23626	0.900066	1.31858	-1.27786	1.42694e-05	-1.12749	0.00105187	-0.440342	0.170083	-0.157366	0.930349
Cre06.g288600	Cre06.g288600.t1.2				0.927447	1.15453	4.34621	5.44129	0.683916	1.47071	7.75256	8.62424	1.81803	5.22585e-13	2.77395	3.38116e-38	-0.145496	0.983576	0.587757	0.002896
Cre06.g292900	Cre06.g292900.t1.2				8.73561	8.65976	21.2881	19.9565	6.10275	8.1525	22.4595	22.7128	1.27859	3.13595e-18	1.81818	7.92291e-37	-0.450389	0.053722	0.011669	1
Cre06.g292950	Cre06.g292950.t1.1				4.90919	5.19854	16.0473	16.0459	8.6883	5.72323	5.38347	5.39614	1.38152	8.30877e-08	-0.11631	0.894239	0.205938	0.706387	-1.42124	0
Cre06.g293100	Cre06.g293100.t1.1	_	Qc-SNARE SYP6-like protein	Expressed Protein. Has SYP6-like SNARE domain, but has structure different from other SNAREs. Specific to Chlamydomonas.	5.99397	7.21347	46.39	40.706	14.6642	14.0288	117.908	113.421	2.47584	1.96164e-45	3.11212	7.65733e-162	0.760043	0.004837	1.26363	0
Cre06.g295700	Cre06.g295700.t1.2	MCM3	minichromosome maintenance protein 3	homologous to MCM3 DNA replication protein	1.72511	1.74067	7.68252	6.83727	7.46919	7.56735	21.4875	20.8935	1.78053	8.19797e-16	1.66325	1.43578e-37	1.58762	0	1.36655	0
Cre06.g296250	Cre06.g296250.t1.2	SYK1	tRNA synthetase, class II	putative tRNA synthetase class II (D, K and N) family protein	4.04931	4.78174	16.2008	14.386	3.69182	2.335	3.62851	4.49282	1.60271	5.96686e-14	0.542478	0.189632	-0.568618	0.129905	-1.79191	0
Cre06.g297200	Cre06.g297200.t1.1	FAP108	Flagellar Associated Protein	Flagellar Associated Protein, found in the flagellar proteome [PMID: 15998802]	10.7132	14.5895	27.1441	27.8358	20.0816	18.832	69.7314	67.6861	1.17013	5.92632e-14	2.00424	5.61724e-83	0.396756	0.110591	1.17361	0
Cre06.g297400	Cre06.g297400.t1.2				0.586407	1.14258	3.58439	4.54835	3.63239	4.22683	35.7009	33.3993	1.19627	0.00241122	2.90942	1.43235e-45	1.04715	0.015713	2.58131	0
Cre06.g297450	Cre06.g297450.t1.1				3.30078	3.42317	14.4485	16.1997	4.80529	4.05233	8.33451	7.79717	1.92539	1.08504e-20	0.964862	0.000135722	0.145713	0.830569	-0.964213	1e-06
Cre06.g298750	Cre06.g298750.t1.1	AOT4	amino acid transporter	belongs to AAAP family of amino acid/auxin permeases; most similar to plant and fungal relatives	33.4119	34.9047	2.97939	2.75906	34.6536	34.3053	3.84074	3.99505	-3.0274	5.97118e-84	-2.69789	6.96814e-72	-0.18378	0.161271	0.274974	0.557394
Cre06.g299700	Cre06.g299700.t1.1	SOUL1	SOUL heme-binding protein	_	16.8485	21.4444	410.613	415.15	7.69509	8.69697	11.1083	9.00234	4.31809	0	0.429838	0.285935	-1.13455	1e-05	-5.18579	0
Cre06.g302050	Cre06.g302050.t1.1	GTR12	glycosyl transferase	might be a 1,3-beta-D-glucan synthase	0.350437	0.183833	2.00197	1.73701	0.787181	1.00261	5.97845	6.08652	2.02684	2.13585e-13	2.69821	1.98021e-50	1.0105	0.006984	1.46825	0
Cre06.g304950	Cre06.g304950.t1.1				1.44402	2.2953	4.87779	4.14908	3.22816	3.08968	1.4542	1.52388	1.07401	0.000193244	-0.654868	0.0841312	0.432703	0.314449	-1.38452	2e-06
Cre06.g305750	Cre06.g305750.t1.1				5.12432	6.18087	13.7594	13.7582	5.93805	5.69873	22.6021	19.8898	1.20067	3.65501e-08	1.91536	2.51021e-25	-0.125915	0.835551	0.474801	0.011568
Cre06.g306041	Cre06.g306041.t1.1				0.7985	1.81514	4.63675	4.16864	0.824359	0.805784	3.12514	2.78444	1.20032	0.000728969	1.30737	0.001257	-0.387002	0.496289	-0.540037	0.194071
Cre06.g306057	Cre06.g306057.t1.1				35.6076	34.6898	78.4592	79.6683	18.8039	15.3996	34.9648	35.0471	1.13714	9.5345e-09	1.07072	0.000123399	-0.984192	0.000361	-1.18308	0
Cre06.g307350	Cre06.g307350.t1.2				11.5373	11.5319	23.4918	22.7293	11.4027	9.26652	28.2133	26.7775	1.07099	2.13023e-15	1.5965	2.56384e-37	-0.340092	0.098515	0.127127	0.450257
Cre06.g308500	Cre06.g308500.t1.1	CMPS1	carbamoyl phosphate synthase, small subunit	Putative carbamoyl phosphate synthase (glutamate dependent), small subunit (EC 6.3.5.5); Target-P predicts organelle (weakly mitochondrial) targeting	195.928	193.869	75.9921	76.2068	245.893	253.397	138.598	143.578	-1.1975	1.27015e-71	-0.574607	6.43054e-27	0.152622	0.011305	0.761749	0
Cre06.g308750	Cre06.g308750.t1.1				7.05381	7.35144	23.1623	17.3237	8.85482	4.54049	16.4072	13.7287	1.36117	1.05043e-05	1.28607	0.000102021	-0.291247	0.717284	-0.49663	0.123458
Cre06.g309100	Cre06.g309100.t1.1	CPN60C	Chaperonin 60C	GroEL/HSP60-homolog, targeted to mitochondria; forms stacks of two homo-oligomeric heptameric rings; Cpn60s require mitochondrial Cpn10s to fold non-native proteins to the native state in an ATP-consuming process; PMID: 16143837	107.83	106.507	246.186	249.762	82.1926	76.0004	120.246	117.551	1.33676	2.27366e-147	0.825628	1.19181e-36	-0.633087	0	-1.17379	0
Cre06.g310500	Cre06.g310500.t1.1				0.840886	1.29709	4.49739	4.32721	2.79038	2.84873	2.86442	2.68789	1.57024	1.86219e-08	0.183822	0.748284	0.852198	0.017643	-0.676802	0.021248
Cre07.g315050	Cre07.g315050.t1.2				2.58192	2.66333	8.21584	6.25251	3.22552	3.54695	2.50974	3.04526	1.11613	0.000241099	-0.0323987	1	0.108364	0.954058	-1.17531	0.000235
Cre07.g317300	Cre07.g317300.t1.2	MAPKKKK1	Mitogen Activated Protein Kinase Kinase Kinase Kinase 1	MAPKKKK1; MAP (Mitogen-Activated Protein) Kinase Kinase Kinase Kinase; MAP4K; (Ste20-like)	11.3019	10.9239	29.8632	28.3531	16.0647	17.0883	65.9433	68.1931	1.42523	1.08592e-25	2.20358	1.4293e-118	0.34536	0.078866	1.06527	0
Cre07.g317750	Cre07.g317750.t1.2	_	Chlamydomonas specific family protein	_	1.62416	1.29461	0.338441	0.198212	1.11058	1.14941	0.192624	0.386154	-1.10443	0.00752408	-0.960297	0.0659671	-0.359703	0.489384	-0.012488	1
Cre07.g318000	Cre07.g318000.t1.1				14.8879	14.2562	35.5839	37.1251	34.0055	35.2204	74.5915	67.2237	1.35007	5.89391e-21	1.24799	2.41718e-30	0.975571	0	0.823913	0
Cre07.g318950	Cre07.g318950.t1.1				7.95646	9.85345	20.6486	22.388	15.931	13.5891	40.5813	39.1485	1.32449	3.36659e-22	1.6391	6.13227e-61	0.493045	0.019359	0.755115	0
Cre07.g321750	Cre07.g321750.t1.1				9.29978	8.32943	0.962688	1.74513	1.32732	1.42715	0.652279	0.130763	-1.70896	9.5345e-09	-0.801511	0.254887	-1.96932	0	-0.939697	0.121653
Cre07.g326450	Cre07.g326450.t1.2	VPS5B	subunit of Retromer complex	Hypothetical Conserved Protein. Similar to VPS5/SNX1, component of Retromer Coat complex involved in endosomal to Golgi trafficking.	15.1622	18.1953	33.5115	32.6209	27.1007	27.5323	67.7689	61.2756	1.06622	5.09123e-16	1.4505	4.11971e-40	0.485588	0.001759	0.826831	0
Cre07.g326900	Cre07.g326900.t1.1				20.3015	18.1021	3.9436	4.46526	17.5081	17.56	7.78093	7.04931	-1.63089	2.40259e-12	-0.882187	0.0002584	-0.298259	0.231947	0.561706	0.141253
Cre07.g327100	Cre07.g327100.t1.1				81.8733	88.7576	204.917	202.203	84.6274	86.9395	334.977	326.35	1.36817	1.39737e-78	2.16918	8.89753e-285	-0.18943	0.102916	0.576464	0
Cre07.g327450	Cre07.g327450.t1.1	DNJ34	DnaJ-like protein	DnaJ-like protein, perhaps targeted to the chloroplast (contains N-terminal extension that is predicted by ChloroP to be chloroplast transit peptide); no homology with other proteins in protein database	237.547	236.439	101.781	106.496	132.232	132.477	57.1876	49.4317	-1.03832	3.85683e-101	-1.06028	7.67554e-52	-1.03689	0	-1.07774	0
Cre07.g328700	Cre07.g328700.t1.2				4.09708	3.20442	7.14259	7.64329	9.29355	10.6314	25.9471	25.7063	1.01037	8.10506e-07	1.56901	9.82196e-44	1.11887	0	1.62341	0
Cre07.g329350	Cre07.g329350.t1.1	_	predicted protein	Chlamydomonas-specific family protein	4.76011	3.73986	10.559	9.0699	4.75574	4.64858	12.6871	10.8429	1.03397	0.000177285	1.32692	1.39921e-07	-0.036053	1	0.126175	0.816789
Cre07.g329882	Cre07.g329882.t1.2	KCN5	voltage-gated K+ channel, alpha subunit	Voltage-dependent 1-domain potassium channel (Shaker-like), alpha subunit; P-loop contains conserved motif for K+ selectivity, cyclic nucleotide binding domain at C-terminus	0.382221	0.325823	1.44559	1.02622	1.14152	0.950494	2.16078	2.54072	1.09229	0.00315658	1.12828	0.000209153	0.78265	0.071452	0.668919	0.056365
Cre07.g330300	Cre07.g330300.t1.1				9.26208	8.62526	21.1054	17.3098	24.9496	21.7956	70.7223	65.7828	1.08015	6.06452e-08	1.73663	6.28998e-57	1.05753	0	1.65759	0
Cre07.g330950	Cre07.g330950.t1.1	AP4S4	Sigma4-Adaptin	Expressed Protein. Sigma4-Adaptin. Clathrin Adaptor Complex Small Subunit, putative member of AP-4 complex	56.728	63.6853	123.935	128.311	80.5924	73.7931	210.264	194.531	1.1649	1.2683e-30	1.60866	1.49452e-67	0.150166	0.388462	0.554753	0
Cre07.g332276	Cre07.g332276.t1.1				12.0509	14.4153	1.67834	1.77475	10.1239	10.9513	1.45938	1.72877	-1.98848	2.88571e-14	-1.89563	2.61069e-10	-0.457141	0.072078	-0.146737	0.955548
Cre07.g336900	Cre07.g336900.t1.2				6.57401	6.76038	36.7231	36.6082	18.9602	15.5846	75.7051	80.3407	2.3247	1.49956e-49	2.34822	1.31115e-110	1.02243	1e-06	0.949604	0
Cre07.g337100	Cre07.g337100.t1.1				234.083	224.718	501.193	482.075	412.263	406.753	648.606	635.058	1.22897	8.68943e-143	0.890174	7.73129e-123	0.628078	0	0.264099	0
Cre07.g339650	Cre07.g339650.t1.2	DNJ20	DnaJ-like protein	DnaJ-like protein, probably cytosolic; contains N-terminal J-domain (pfam00226) and DnaJ_C, DnaJ C terminal region (pfam01556); weak similarity to Xanthomonas axonopodis Q8PMA9 and to Porphyromonas gingivalis Q9XCA6	0.871191	0.231473	2.17845	1.98464	1.40167	1.09607	5.235	4.76401	1.22558	0.00159499	1.77619	2.95427e-10	0.601579	0.320963	0.952614	0.001422
Cre07.g339950	Cre07.g339950.t1.2				0.912829	0.254086	2.86952	2.45083	2.30789	1.01515	2.72198	3.52416	1.21055	0.00309153	0.848623	0.0535814	0.64143	0.419831	0.078649	1
Cre07.g340050	Cre07.g340050.t1.1				3.87233	3.60104	1.21037	1.18144	5.84084	7.9168	2.37281	2.83873	-1.00721	0.00253608	-0.971724	0.00224393	0.551463	0.058543	0.726491	0.085548
Cre07.g340250	Cre07.g340250.t1.2				0.529406	1.03152	3.81382	3.85806	0.602321	0.654167	0.263108	0.329658	1.63032	7.3679e-08	-0.41108	0.630027	-0.238919	0.739172	-2.50833	0
Cre07.g342100	Cre07.g342100.t1.1				3.73168	4.93389	121.706	115.697	4.24564	3.68887	11.1276	9.87571	4.42571	9.14075e-275	1.39898	2.35152e-08	-0.238339	0.627005	-3.47776	0
Cre07.g342800	Cre07.g342800.t1.2	CGL16	predicted protein	Conserved protein	4.26834	2.54865	11.2355	11.8296	2.92417	2.62009	3.47278	2.88079	1.49493	2.5956e-09	0.321946	0.57384	-0.31809	0.505988	-1.66393	0
Cre07.g343050	Cre07.g343050.t1.1				27.647	21.8842	7.28773	8.35073	27.8287	22.419	10.8204	12.9548	-1.15009	2.31132e-05	-0.710592	0.0135964	-0.155617	0.712148	0.3767	0.434528
Cre07.g344300	Cre07.g344300.t1.1				1.68492	1.4687	3.98408	3.96824	4.15906	4.67899	8.40686	8.89049	1.03177	0.00105445	1.07918	1.56011e-06	0.939271	0.003504	0.887228	0.000285
Cre07.g346350	Cre07.g346350.t1.1				0.996934	0.388495	4.9359	6.06706	7.0575	4.48401	79.4226	73.5258	1.60165	7.82079e-06	3.6229	7.24209e-116	1.5316	0.000383	3.34773	0
Cre07.g346900	Cre07.g346900.t1.2				39.6785	28.9919	85.8567	83.8051	34.4093	30.202	64.5327	65.7222	1.32001	1.39488e-15	1.16781	3.34747e-11	-0.243284	0.506458	-0.47892	0.002848
Cre07.g348000	Cre07.g348000.t1.1				81.429	79.6949	18.0213	17.2556	30.1478	31.4115	15.141	17.1349	-1.90908	6.77941e-47	-0.640858	0.000889549	-1.51724	0	-0.228806	0.469989
Cre07.g348350	Cre07.g348350.t1.1				3.78541	4.14883	1.0846	1.55274	4.60586	4.91136	1.16601	1.44376	-1.0287	0.00116044	-1.2885	2.55873e-05	0.049505	1	-0.086009	1
Cre07.g348600	Cre07.g348600.t1.2	SULP1	chloroplast sulfate permease	transmembrane component of chloroplast sulfate-transporting ABC transporter; ATP-dependent sulfate-transport system of chloroplast envelope, homologous to SulP2; [GI:18542422]	70.7033	67.5351	15.8897	15.0605	28.8934	32.9133	10.0485	12.0428	-1.90814	1.25984e-58	-1.16917	2.0238e-13	-1.32043	0	-0.564676	0.008552
Cre07.g349200	Cre07.g349200.t1.1				104.075	103.757	52.858	38.2888	93.1696	90.8079	29.8202	35.1807	-1.00247	1.65506e-10	-1.19932	9.84373e-17	-0.364983	0.004254	-0.556332	0.117699
Cre07.g350500	Cre07.g350500.t1.1				17.3361	19.3885	6.70009	6.19211	14.584	14.1882	12.1703	11.9956	-1.24235	2.19266e-14	-0.0062938	1	-0.522102	0.000477	0.731879	0.000171
Cre07.g350750	Cre07.g350750.t1.1	PTOX1	alternative oxidase	alternative oxidase, possibly chloroplast-localized; quinol-to-oxygen oxidoreductase; shares similarities with plastid terminal oxidase IMMUTANS [PMID: 12227339, PMID: 14503001]	72.0519	67.0961	146.368	151.958	72.5269	68.1417	206.615	212.22	1.21872	3.48846e-68	1.80198	3.70288e-197	-0.183274	0.089817	0.367448	0
Cre07.g351150	Cre07.g351150.t1.1	FA2	Flagellar Autonomy 2 NIMA family kinase	Flagellar Autonomy 2 protein, NIMA family kinase; PMID: 11950892	4.89403	4.66645	11.0747	11.0897	4.60716	3.96295	14.8523	11.9825	1.13267	3.34948e-07	1.67801	7.98269e-12	-0.288707	0.475017	0.138041	0.665203
Cre07.g353250	Cre07.g353250.t1.1				8.39829	8.52274	2.08545	2.66196	2.63205	2.27007	3.19559	2.89805	-1.15794	0.000244843	0.379913	0.53064	-1.40859	2e-06	0.167864	0.914765
Cre07.g354850	Cre07.g354850.t1.1				1.17214	0.986212	0.24425	0.0953652	1.17867	1.38253	0.185353	0.185789	-1.20723	0.00330396	-1.46429	0.000566918	0.030114	1	0.037265	1
Cre07.g355850	Cre07.g355850.t1.1				105.962	117.242	217.041	222.211	397.884	398.213	406.013	397.457	1.10077	2.2355e-62	0.257227	1.24806e-09	1.61621	0	0.747577	0
Cre07.g357200	Cre07.g357200.t1.1	UGD1	UDP-glucose dehydrogenase	Protein belonging to the UDP-glucose/GDP-mannose dehydrogenase family. Found in the flagellar proteome [PMID: 15998802]	89.1242	88.0099	163.43	179.846	70.0554	67.3216	122.923	119.296	1.07682	4.18085e-28	1.05027	1.43285e-49	-0.559091	0	-0.616853	0
Cre07.g357250	Cre07.g357250.t1.2				0.668772	0.868712	2.75929	2.29434	1.47949	1.34974	3.10212	3.01225	1.01721	0.0097544	0.962165	0.013299	0.353402	0.606755	0.122003	0.93423
Cre07.g357750	Cre07.g357750.t1.1				3.49088	4.81795	15.4699	16.6624	3.34651	2.89367	11.7649	13.6946	1.69231	8.07008e-14	1.88889	2.97164e-14	-0.423322	0.313829	-0.42191	0.075411
Cre08.g358200	Cre08.g358200.t1.2	ACV4	protein kinase	described in AAK14340, next to MCA1 gene	2.50545	3.17313	6.94893	5.60568	4.76671	5.09273	2.23353	2.07497	1.06923	4.01873e-06	-0.815337	0.00294599	0.501944	0.086237	-1.44464	0
Cre08.g359200	Cre08.g359200.t1.2				0.490393	0.71663	1.7985	2.12126	0.867899	1.4846	7.03738	5.41514	1.03332	0.00761377	2.11509	7.06018e-11	0.395283	0.495553	1.28886	3e-06
Cre08.g359950	Cre08.g359950.t1.1				0.547237	0.533131	4.01395	3.42828	1.21063	0.710009	1.66581	2.86239	1.15404	0.007806	0.700243	0.244924	0.18231	0.954854	-0.52808	0.40571
Cre08.g360350	Cre08.g360350.t1.2	ADI1	arginine deiminase	arginine deiminase is part of the arginine dihydrolase pathway, allowing use of arginine as a carbon source in anaerobic conditions (PMID: 12450748)	2.88717	3.75034	0.882385	0.738257	5.23138	4.04324	2.7502	2.75666	-1.0167	0.00981186	-0.38053	0.427156	0.202582	0.752964	1.01418	0.029193
Cre08.g360800	Cre08.g360800.t1.2	_	haloacid dehalogenase-like hydrolase	conserved protein related to haloacid dehalogenase-like hydrolase family protein	3.11657	3.89018	8.66174	9.41355	6.46372	8.42411	23.4633	23.6034	1.22724	2.18291e-07	1.79253	3.32463e-30	0.720175	0.009249	1.19147	0
Cre08.g362550	Cre08.g362550.t1.1	VPS37	subunit of the ESCRT-I complex	Expressed Protein. Similar to the VPS37 class of Ub-binding enzymes that are components of the ESCRT-I complex involved in protein sorting at the MVB.	4.48606	4.76774	9.348	11.0712	5.89443	3.99785	16.6706	12.799	1.01379	7.89287e-05	1.60033	6.01962e-07	-0.097022	0.959451	0.367606	0.226219
Cre08.g363300	Cre08.g363300.t1.1				26.0793	23.8109	54.4576	51.8121	12.0825	10.8654	27.6695	25.473	1.16752	8.9106e-22	1.35978	1.65891e-16	-1.20273	0	-1.08521	0
Cre08.g363600	Cre08.g363600.t1.1				7.878	9.86778	2.57967	2.89573	6.59778	6.81417	3.3035	2.08487	-1.14011	6.06867e-05	-0.864112	0.0140815	-0.494556	0.087607	-0.122179	0.985977
Cre08.g364050	Cre08.g364050.t1.1				18.1078	19.4727	4.80836	5.40191	12.6087	10.9552	5.93808	6.12457	-1.52289	1.55471e-16	-0.650795	0.00409095	-0.811826	1e-06	0.106836	0.905904
Cre08.g364150	Cre08.g364150.t1.2				1.4665	2.27699	15.4627	16.6518	2.47375	2.49729	18.0158	16.6998	2.88307	1.71815e-74	2.84484	6.1426e-87	0.188129	0.767229	-0.007425	1
Cre08.g364179	Cre08.g364179.t1.1				2.52456	1.36638	14.9169	12.8031	1.48933	2.66891	14.3939	9.04791	1.85627	1.09254e-09	1.89354	0.000225988	-0.047694	1	-0.330571	0.491182
Cre08.g365500	Cre08.g365500.t1.2				0.893006	0.362495	2.52454	2.06461	0.987777	0.901153	3.49501	3.37349	1.23133	0.000603641	1.58003	4.97197e-07	0.250597	0.831609	0.385389	0.352646
Cre08.g365900	Cre08.g365900.t1.1	LHCSR1	stress-related chlorophyll a/b binding protein 1	LI818r-1, stress-related chlorophyll a/b binding protein LhcSR1; Low-CO2 and high-light inducible chlorophyll a/b binding protein, possibly related to photoprotection; regulated by CCM1 [PMID: 15235119]	122.281	115.4	36.2018	34.4801	190.156	192.288	155.885	167.517	-1.52595	4.75534e-38	0.00213142	1	0.474013	0	2.01326	0
Cre08.g366650	Cre08.g366650.t1.2				0.746565	0.509126	1.81393	2.50554	0.594572	0.516601	0.909029	1.36675	1.37178	4.24318e-05	0.918059	0.016482	-0.224392	0.753111	-0.878425	0.021876
Cre08.g367400	Cre08.g367400.t1.1				7287.47	7376.61	2093.25	2032.28	1903.72	1874.52	733.655	762.361	-1.68528	0	-1.08568	1.39595e-111	-2.15392	0	-1.57499	0
Cre08.g367500	Cre08.g367500.t1.1	LHCSR2 || LHCSR3.1	Stress-related chlorophyll a/b binding protein 2	Stress-related chlorophyll a/b binding protein, similar to LI8I8r-1/LHCSR1; immediately downstream of LHCSR3 on scaffold 29.	5670.14	5524	1535.6	1546.84	960.653	932.83	370.217	348.051	-1.71437	0	-1.14093	4.0652e-62	-2.75426	0	-2.20154	0
Cre08.g368950	Cre08.g368950.t1.1	DHQS	3-dehydroquinate synthase	Putative 3-dehydroquinate synthase; catalyzes conversion of 3-deoxy-arabino-heptulosonate-7-phosphate to dehydroquinate in the chorismate biosynthesis pathway. Predicted plastid location by Target-P and by homology	19.9226	19.4091	102.292	98.9561	25.2323	25.7408	69.4172	67.6266	2.38836	5.46276e-126	1.62574	2.45046e-56	0.159882	0.485794	-0.665301	0
Cre08.g372100	Cre08.g372100.t1.1	HSP70A	Heat shock protein 70A	HSP70A is one of 9 genes encoding HSP70-like proteins in Chlamydomonas; HSP70A is localized to the cytosol and to flagella; it is inducible by heat shock and light [PMID: 2779571, 1541398, 16151252, 16143837]. Found in the flagellar proteome [PMID: 15998802]	152.75	154.383	339.175	336.004	172.394	179.549	250.249	244.696	1.26752	3.08156e-190	0.733797	2.30074e-63	-0.006958	1	-0.566206	0
Cre08.g372350	Cre08.g372350.t1.2	FAP188	Flagellar Associated Protein	Flagellar Associated Protein, found in the flagellar proteome [PMID: 15998802]	9.83818	9.88412	4.51015	2.75149	10.2021	7.84484	7.35325	10.4528	-1.00245	0.000598002	0.188868	0.748745	-0.286965	0.41445	0.97214	0.023226
Cre08.g375150	Cre08.g375150.t1.2				24.8409	23.6452	56.3794	55.9068	9.58546	10.8489	36.976	35.2879	1.30864	2.13248e-44	1.98789	7.64444e-62	-1.36159	0	-0.744142	0
Cre08.g377300	Cre08.g377300.t1.2				11.6731	13.0687	26.4907	23.4336	15.9795	14.5038	49.6965	50.4318	1.09342	4.54365e-16	1.91877	3.06353e-100	0.092978	0.747051	0.872507	0
Cre08.g377400	Cre08.g377400.t1.2				0.481596	0.117296	1.04871	1.29303	1.33177	1.51004	2.77493	2.46657	1.12201	0.00839429	0.897884	0.00582103	1.18915	0.005508	0.822763	0.021413
Cre08.g377750	Cre08.g377750.t1.2				1.64661	1.91466	3.55516	4.80125	1.97412	1.60804	8.13065	9.58525	1.08046	0.000341217	2.26726	4.93314e-26	-0.148727	0.83321	0.905245	0.000101
Cre08.g379400	Cre08.g379400.t1.2				4.13498	3.01024	7.49914	8.62127	13.8722	13.8348	47.6213	46.5054	1.1832	1.41889e-09	1.97483	3.65571e-138	1.63155	0	2.37483	0
Cre08.g380000	Cre08.g380000.t1.1				58.096	56.0097	317.381	314.801	47.4649	42.9321	112.422	109.328	2.58575	0	1.52568	1.06923e-131	-0.530729	0	-1.62532	0
Cre08.g380300	Cre08.g380300.t1.2	MSRA3	peptide methionine sulfoxide reductase	_	31.138	28.6807	337.142	332.633	26.5521	30.6059	40.1299	38.4968	3.45256	1.87649e-282	0.65855	0.000581841	-0.242565	0.385878	-3.12945	0
Cre08.g380350	Cre08.g380350.t1.1				1.09725	1.52709	13.2221	10.1005	0.416123	0.949075	0.681644	0.409949	2.20566	5.31359e-13	-0.0148565	1	-0.519927	0.406719	-3.06444	0
Cre08.g380950	Cre08.g380950.t1.1				12.4736	12.5348	31.9685	32.1714	12.2546	14.2723	25.8828	24.5737	1.39811	6.97072e-25	1.12085	2.14123e-15	-0.111573	0.766722	-0.45283	0.0004
Cre08.g381000	Cre08.g381000.t1.1				4.85089	3.81385	1.56057	0.913968	7.00365	7.8764	1.99845	2.44829	-1.16762	0.000182684	-1.27137	1.07091e-06	0.495612	0.071989	0.545194	0.276463
Cre08.g381510	Cre08.g381510.t1.1				13.6989	11.7068	227.182	216.377	6.38007	7.69145	11.0782	10.8947	3.94034	8.70649e-256	0.727714	0.0269563	-0.820677	0.005584	-4.21254	0
Cre08.g383000	Cre08.g383000.t1.2				8.76941	8.51361	2.82954	3.22681	7.19225	8.14023	3.13583	2.79692	-1.26649	4.00484e-17	-1.0624	8.754e-12	-0.361451	0.011936	-0.137053	0.729314
Cre08.g385350	Cre08.g385350.t1.1				5.65488	6.76836	1.03696	1.01218	7.50601	8.38502	1.33494	1.19723	-1.75003	7.07786e-11	-1.96658	5.683e-14	0.136354	0.753111	0.122365	0.974283
Cre09.g387700	Cre09.g387700.t1.1				12.3219	12.0043	3.81888	4.81485	8.29289	7.05526	3.01877	2.4207	-1.04071	0.000178822	-0.959988	0.00626481	-0.720364	0.006813	-0.568687	0.216435
Cre09.g389050	Cre09.g389050.t1.2				7.35644	7.0396	2.07535	2.49324	3.31264	3.76511	1.24933	2.20096	-1.3218	8.52952e-12	-0.725519	0.0536569	-1.11088	0	-0.479726	0.341191
Cre09.g389500	Cre09.g389500.t1.2	_	Chlamydomonas specific family protein	_	2.73601	2.32156	0.728291	0.552913	1.7963	1.98484	0.690845	0.615529	-1.05939	0.00476802	-0.821303	0.0808706	-0.434858	0.313837	-0.045637	1
Cre09.g390300	Cre09.g390300.t1.2				1.7882	1.74211	0.322052	0.485824	0.395594	0.497161	0.305493	0.250537	-1.3748	4.99625e-06	-0.267157	0.761237	-1.57202	0	-0.390325	0.569029
Cre09.g390550	Cre09.g390550.t1.2				27.7158	27.0014	77.9292	73.1731	17.168	19.1785	56.647	51.5452	1.40336	5.43257e-14	1.60638	5.92295e-14	-0.642119	0.027232	-0.567158	0.001976
Cre09.g391850	Cre09.g391850.t1.2				0.884031	0.287082	2.22898	2.10979	0.26076	0.764653	1.02515	0.963341	1.24397	0.000775561	0.766091	0.184502	-0.174489	0.959451	-0.903975	0.022001
Cre09.g391900	Cre09.g391900.t1.2	TRXH	Thioredoxin h1	Thioredoxin h1, cytosolic. This protein was previously named Ch1 [PMID: 2040309, PMID: 2191628, PMID: 11538123, PMID: 7632918]. mRNA level regulated by light, circadian clock and heavy metals [PMID: 11898433; PMID: 10436225, PMID: 10398712, PMID: 11538123]. 3D structure determined by X-ray crystallography and RMN [PMID: 7744070, PMID: 9030762, PMID: 11563970, 9030762, PMID: 11582571]. Many bioche…	170.306	179.916	348.179	355.457	311.96	298.583	405.267	431.81	1.12606	1.50143e-56	0.6944	6.14156e-27	0.588859	0	0.129068	0.065859
Cre09.g392000	Cre09.g392000.t1.2				1.97548	1.50618	5.11877	5.30393	3.1922	2.89739	19.6464	16.8473	1.27144	5.34498e-06	2.54109	8.65302e-36	0.436969	0.310949	1.5612	0
Cre09.g392500	Cre09.g392500.t1.1				63.449	63.3006	116.249	116.983	40.3248	39.8877	69.2161	66.5277	1.00069	2.34345e-43	0.98469	2.29955e-28	-0.840108	0	-0.89127	0
Cre09.g392900	Cre09.g392900.t1.2				0.061577	0.0599898	0.451663	0.44087	0.245203	0.106523	0.508773	0.483129	1.20893	0.00437864	1.05401	0.0261177	0.426499	0.554867	0.02183	1
Cre09.g395750	Cre09.g395750.t1.2				6.05124	5.48714	15.5349	12.8725	13.3869	13.1658	28.5008	31.1243	1.33472	1.00605e-10	1.38034	1.76537e-45	0.938	0	0.9356	0
Cre09.g395900	Cre09.g395900.t1.1				16.8683	15.5206	2.70986	3.67734	5.10317	5.73642	0.626957	1.19402	-1.93246	5.27632e-27	-1.86002	2.25888e-10	-1.6237	0	-1.47099	4.8e-05
Cre09.g396100	Cre09.g396100.t1.1	PHC15	cell wall protein pherophorin-C15	Pherophorin-C15 (PHC15) [PMID: 16367971]; partial sequence similar to extracellular matrix protein (cell wall protein) pherophorin-C2 [Genbank entry DQ196108], which belongs to the large pherophorin-family, a family of glycoproteins with a central hydroxyproline-rich (HR) domain.	53.4297	43.6649	94.2612	99.4873	233.263	255.166	324.623	327.374	1.08425	6.43088e-19	0.657692	3.2307e-28	2.06718	0	1.60999	0
Cre09.g396950	Cre09.g396950.t1.2	CGL15	permease of major facilitator superfamily	Conserved expressed permease of the major facilitator superfamily	38.4441	38.7663	74.8509	73.809	81.7257	83.6592	165.17	166.957	1.06586	5.51187e-52	1.24455	7.33299e-166	0.882743	0	1.03442	0
Cre09.g397900	Cre09.g397900.t1.1	_	transmembrane protein	transmembrane protein, similar to cleft lip and palate associated protein	34.6656	34.0958	95.9607	93.7668	28.4215	26.44	93.7238	97.9995	1.55822	9.08012e-72	2.0082	6.20794e-119	-0.506917	0.000104	-0.104005	0.280645
Cre09.g398500	Cre09.g398500.t1.2	_	predicted protein	Protein of unknown function	19.881	16.7181	5.18066	7.30436	19.0742	19.7305	7.18942	8.84829	-1.25128	4.90055e-08	-0.963874	9.61984e-08	-0.106584	0.696246	0.225067	0.66773
Cre09.g398700	Cre09.g398700.t1.1	CPLD27	coclaurine N-methyltransferase	conserved expressed protein related to putative coclaurine N-methyltransferase; this protein is found in the eyespot proteome	55.7728	57.1457	872.99	894.442	31.3422	31.3292	31.0835	29.2006	4.05069	0	0.179876	0.391857	-1.00388	0	-4.92793	0
Cre09.g399550	Cre09.g399550.t1.1				6.39245	7.14653	16.334	15.9437	14.0026	13.8684	51.0397	57.372	1.22292	1.11936e-10	2.12295	3.90032e-46	0.743212	0.000535	1.57455	0
Cre09.g400300	Cre09.g400300.t1.2	_	predicted protein	protein of unknown function, homologous to a nearby gene	2.91128	2.47027	0.68884	0.67238	3.65653	3.08676	0.898456	1.30992	-1.05667	0.00477073	-0.998374	0.00912736	0.090837	0.954058	0.32735	0.69595
Cre09.g403600	Cre09.g403600.t1.2				4.46679	3.92596	0.578706	0.477973	2.27708	2.60374	0.295589	0.677222	-2.01833	1.71901e-14	-1.58187	3.4172e-06	-0.834804	0.000504	-0.189284	0.959433
Cre09.g406250	Cre09.g406250.t1.2				0.10151	0.296681	1.58221	1.7261	0.449131	0.790221	1.58915	0.973429	1.33593	0.00132938	0.732898	0.16911	0.512409	0.484675	-0.344825	0.651498
Cre09.g407950	Cre09.g407950.t1.1				2.10005	1.85993	0	0.17086	0.506819	1.32107	0.166043	0.665733	-1.33657	0.00970217	-0.361227	0.768046	-0.647081	0.25078	0.590675	0.729598
Cre09.g408000	Cre09.g408000.t1.2				35.611	34.8925	5.25411	4.39591	22.6381	20.0037	5.16197	5.88778	-2.23553	2.62697e-27	-1.46148	2.15655e-09	-0.852275	1e-06	0.059418	1
Cre09.g409050	Cre09.g409050.t1.1				3.09923	2.76774	8.87995	10.748	2.97105	4.80295	9.65881	9.23123	1.43001	2.29304e-08	1.3143	5.86695e-07	0.123069	0.860628	-0.152375	0.72092
Cre09.g409100	Cre09.g409100.t1.1	UROS	Uroporphyrinogen-III synthase	Uroporphyrinogen-III synthase, putative chloroplast precursor [PMID: 15849308]; UROS; hemD; hem4; predicted transit peptide 1-39; converts the linear tetrapyrrole hydroxymethyl bilane to the cyclic tetrapyrrole uroporphyrinogen III	44.8703	38.3265	80.2522	80.0313	58.58	62.1798	120.785	118.039	1.04788	3.94314e-23	1.20831	1.01193e-47	0.325104	0.015552	0.448901	0
Cre09.g410050	Cre09.g410050.t1.1	_	calcium transporting ATPase	high homology to bacterial genes; related to Cation-transporting ATPase pma1	34.6559	33.5942	110.935	105.267	23.3253	23.3977	28.3372	28.4792	1.76423	2.08944e-124	0.511591	2.52682e-05	-0.721777	0	-2.01743	0
Cre09.g410750	Cre09.g410750.t1.1	NII1	Nitrite reductase	nitrite reductase structural gene (Nii1) [GI:3776043, PMID: 9737004]	4.49936	4.54573	0.611157	0.820261	2.06447	2.23417	0.797134	0.508461	-1.63885	6.01142e-08	-0.985408	0.0234482	-0.981995	0.000668	-0.148856	0.979049
Cre09.g411700	Cre09.g411700.t1.2				0.326316	0.190743	3.05172	3.7381	2.1368	1.97576	9.53586	10.241	2.21563	3.24877e-13	2.21224	1.08837e-27	1.55123	3.1e-05	1.3001	0
Cre09.g411750	Cre09.g411750.t1.2				11.7575	12.5172	34.7851	39.2694	9.86791	11.3231	31.9424	33.9196	1.61123	2.39225e-29	1.77482	2.65406e-33	-0.355752	0.162974	-0.278626	0.046338
Cre09.g413050	Cre09.g413050.t1.2				1.81208	1.07184	5.34035	4.98106	4.12333	4.0864	17.5613	16.5871	1.53315	2.19507e-09	2.1419	8.7929e-43	1.03001	0.000575	1.51279	0
Cre09.g413065	Cre09.g413065.t1.1				13.1572	11.7984	41.5364	35.0578	14.9504	16.1654	27.6976	30.1089	1.59509	1.34804e-16	1.06994	3.3e-11	0.102742	0.826681	-0.502309	0.002895
Cre09.g413150	Cre09.g413150.t1.2				2.37564	2.19868	6.47998	6.80351	5.1504	4.72612	17.6139	17.9143	1.38914	2.49317e-10	1.97345	1.38557e-42	0.751632	0.00459	1.23933	0
Cre09.g416309	Cre09.g416309.t1.2				13.0094	12.6741	1.79735	1.59491	2.36548	2.15804	0.929967	0.155359	-1.89643	8.53359e-12	-1.01621	0.0921534	-1.97456	0	-0.948977	0.138587
Cre10.g417730	Cre10.g417730.t1.1				0.527045	1.28365	5.31554	4.95268	1.39915	1.8235	1.83354	1.60812	1.26956	0.0015975	0.174828	0.939445	0.26896	0.841261	-1.05677	0.018267
Cre10.g418700	Cre10.g418700.t1.1				7.48154	5.98047	30.6043	26.9543	6.28091	6.30532	5.50583	4.84983	1.87495	1.94317e-20	-0.0305219	1	-0.221221	0.6635	-2.27123	0
Cre10.g419550	Cre10.g419550.t1.1				38.7783	43.5661	93.5008	97.9122	31.8326	31.9717	98.596	90.3406	1.30755	1.34466e-37	1.75913	5.75392e-66	-0.538261	0.000203	-0.137573	0.227874
Cre10.g421950	Cre10.g421950.t1.1	TEF26	predicted protein	Protein with unknown function, mitochondrial localization assumed; present in thylakoid-enriched fraction based on mass spectrometric peptide identification [PMID: 17078018]	5.62298	5.47805	1.88617	2.08658	3.64082	3.2029	1.66991	1.01626	-1.05804	4.90904e-05	-0.897627	0.00919252	-0.761858	0.002168	-0.540359	0.246048
Cre10.g422450	Cre10.g422450.t1.1				10.7488	10.9221	37.1954	34.5482	12.4776	12.2964	45.1341	43.8296	1.717	1.05176e-32	1.9946	1.51517e-54	-0.009055	1	0.186528	0.192414
Cre10.g424050	Cre10.g424050.t1.2				1.26398	1.50504	3.64839	3.01655	2.44412	2.34856	4.88584	5.79518	1.09408	3.20553e-05	1.25068	2.39768e-09	0.459747	0.204881	0.512873	0.029254
Cre10.g424350	Cre10.g424350.t1.2	_	metalloprotease	Expressed Protein. Similar to conserved proteins of unknown function. Contains Zn-binding LIM-domain and Zn-metalloprotease domains.	1.86691	1.09128	10.8694	11.8628	3.96488	2.90666	23.0566	19.2861	2.37196	1.29386e-24	2.59749	9.83489e-27	0.717061	0.058179	0.734531	3.4e-05
Cre10.g424500	Cre10.g424500.t1.1	_	PfkB-type carbohydrate kinase	PfkB-type carbohydrate kinase family protein, ribokinase	9.81445	8.19556	2.85668	1.95189	6.89271	6.87215	1.62588	1.76551	-1.25655	2.13456e-05	-1.30574	0.000160554	-0.477199	0.121884	-0.392341	0.535623
Cre10.g424583	Cre10.g424583.t1.1				167.663	168.186	73.4888	74.9367	184.708	172.977	68.067	69.0941	-1.02493	1.19946e-63	-1.12764	7.9164e-63	-0.112285	0.075596	-0.230909	0.007347
Cre10.g424700	Cre10.g424700.t1.2				3.39754	3.25658	0.753652	1.32416	6.25543	6.11448	2.14471	2.19752	-1.14911	0.000113608	-1.1185	1.16905e-06	0.604007	0.010047	0.764764	0.052162
Cre10.g424900	Cre10.g424900.t1.1	_	prolyl 4-hydroxylase alpha subunit	_	19.1591	19.6908	43.6263	47.2944	27.5733	25.4952	68.4836	71.5814	1.23967	2.04026e-14	1.57371	1.77596e-33	0.221008	0.425137	0.488305	0.000232
Cre10.g425850	Cre10.g425850.t1.1				9.63753	8.46862	40.1967	37.0376	13.0432	16.5087	78.0677	89.2889	1.94765	1.08864e-27	2.61	7.96846e-43	0.417388	0.154449	0.965078	0
Cre10.g426643	Cre10.g426643.t1.1				20.8304	21.6547	44.719	45.3555	22.3667	17.9077	49.8211	47.7237	1.15498	1.09774e-19	1.47317	2.59596e-34	-0.267975	0.200994	-0.005134	1
Cre10.g426750	Cre10.g426750.t1.1	CYP739A5	cytochrome P450, CYP85 clan	Cytochrome P450. The CYP85 clan families CYP85 and CYP90 make brassinosteroids in higher plants. The CYP737-740 families in Chlamydomonas may metabolize sterols.	58.8592	62.4577	25.5275	25.9011	38.7933	37.9192	20.4978	21.6106	-1.05044	6.11344e-21	-0.597535	1.18729e-05	-0.836925	0	-0.39096	0.018732
Cre10.g426800	Cre10.g426800.t1.2	_	acetyltransferase	_	39.0383	37.7949	4.83688	5.22975	23.1258	20.2179	8.75285	8.34892	-2.55865	7.24436e-77	-1.03758	5.61026e-12	-0.996171	0	0.583947	0.01603
Cre10.g428966	Cre10.g428966.t1.1				3.74945	4.22493	1.20114	1.09158	5.63642	6.29089	3.92891	4.84392	-1.29709	2.23586e-07	-0.188693	0.530887	0.339735	0.157462	1.545	0
Cre10.g429000	Cre10.g429000.t1.2				33.2734	32.0718	12.3	12.638	17.963	21.5279	18.5761	20.3894	-1.17521	2.82512e-19	0.220858	0.278359	-0.89553	0	0.498011	0.002516
Cre10.g431950	Cre10.g431950.t1.1				13.1829	14.0339	4.12238	4.02387	11.9746	11.4782	3.75856	3.99573	-1.47394	7.64168e-24	-1.27625	1.19627e-16	-0.400228	0.002538	-0.175231	0.626575
Cre10.g435200	Cre10.g435200.t1.1				12.4242	9.37084	25.7225	27.6186	15.6047	13.1731	28.2342	32.1439	1.10443	4.58938e-05	1.1279	8.14779e-06	0.151503	0.841261	0.05093	1
Cre10.g435400	Cre10.g435400.t1.1				29.1555	26.9956	82.2939	93.8052	33.3691	36.6813	158.535	161.429	1.7231	1.22994e-28	2.39874	4.45862e-230	0.110059	0.597046	0.737911	0
Cre10.g437900	Cre10.g437900.t1.2				10.9966	9.60873	26.1936	27.5968	9.42996	10.1981	27.509	24.1146	1.38967	1.1165e-18	1.53659	6.08997e-23	-0.239024	0.423186	-0.175191	0.362342
Cre10.g440250	Cre10.g440250.t1.2				6.09846	7.18479	12.6133	15.3582	9.78905	10.5499	24.2996	24.7277	1.01015	1.00854e-05	1.40046	1.39827e-15	0.345202	0.302489	0.652742	0.000491
Cre10.g441550	Cre10.g441550.t1.2	MAM3B	predicted protein	contains a DUF21 transmembrane domain of unknown function usually associated with CBS domains (found in Hemolysins and Mg2+/CO2 transporters CorB CorC); similarity to many Arabidopsis proteins and to yeast Mam3p, involved in mitochondrial biogenesis	0.539216	0.450272	1.48317	2.06818	3.54456	3.9311	11.4563	12.3562	1.06837	0.00515612	1.73342	1.17053e-19	1.72698	0	2.29248	0
Cre10.g444550	Cre10.g444550.t1.1	SPP1A	signal peptide peptidase	SppA, protease IV, signal peptide peptidase, serine endopeptidase of S49 family (ClpP clan); contains 2 functional S49 domains; probably associated with thylakoid membrane and involved in cleavage of membrane proteins or signal peptide; called SPPA1-1 in Sokolenko, 2005, Physiol. Plantarum 123:391	14.277	14.1853	48.026	48.6554	8.78504	9.15958	11.3481	10.7978	1.80535	2.48909e-55	0.505945	0.0182822	-0.787968	2.1e-05	-2.16246	0
Cre10.g445050	Cre10.g445050.t1.1	SLT3	sodium/sulfate co-transporter	SAC1-like transporter 3, putative sodium/sulfate co-transporter, transcript is down-regulated during sulfur-deprivation; related to the SAC1 protein which regulates sulfur-deficiency responses [PMID: 16307308]	70.2893	72.388	23.7928	26.3988	32.7928	31.731	9.57984	11.3113	-1.32572	2.08984e-45	-1.32404	5.24807e-22	-1.31473	0	-1.31906	0
Cre10.g446700	Cre10.g446700.t1.1	ANK28	predicted protein	protein of unknown function with ankyrin repeats	7.15604	5.49277	18.0928	18.2427	14.008	11.7229	24.0465	22.8742	1.4624	4.06346e-15	1.0565	4.69809e-12	0.721944	0.001493	0.237667	0.214902
Cre10.g447700	Cre10.g447700.t1.2				5.5117	4.73256	1.48464	1.44917	3.16887	3.23215	0.758321	0.787251	-1.43226	1.86613e-13	-1.53859	4.72438e-10	-0.801632	6e-06	-0.846033	0.009805
Cre10.g447950	Cre10.g447950.t1.1				191.447	189.55	451.121	442.76	187.438	199.576	359.226	359.165	1.35536	9.4063e-140	1.12973	2.79454e-95	-0.178832	0.029793	-0.433161	0
Cre10.g448850	Cre10.g448850.t1.1	FAP135	Flagellar Associated Protein	Flagellar Associated Protein; found in the flagellar proteome [PMID: 15998802]; similar to Calpain-Like Protein	4.32521	4.86919	1.93876	1.11825	3.0619	3.15919	1.67189	1.25686	-1.0272	0.00156862	-0.629939	0.144196	-0.594844	0.063485	-0.1039	0.971475
Cre10.g450000	Cre10.g450000.t1.1				2.56003	2.79819	9.50332	10.5056	4.64124	3.56453	15.9658	16.6021	1.74228	2.7395e-19	2.09113	1.0739e-40	0.330092	0.334187	0.560377	0.000194
Cre10.g450850	Cre10.g450850.t1.2				16.0423	10.9774	3.76471	2.7347	8.11189	6.69019	5.23214	4.2455	-1.58671	0.000383363	-0.350399	0.282225	-0.942032	0.023822	0.361146	0.379626
Cre10.g451150	Cre10.g451150.t1.2				5.8912	6.18774	1.94115	0.90619	4.96876	4.06061	0.800583	0.48148	-1.43746	6.06855e-07	-1.81834	9.63255e-08	-0.521506	0.071255	-0.736096	0.293658
Cre10.g452250	Cre10.g452250.t1.2				3.71038	2.84016	1.09348	0.474376	7.97377	7.56487	4.26426	3.2346	-1.06458	0.007806	-0.677291	0.038168	0.811877	0.008359	1.41275	0.000635
Cre10.g453100	Cre10.g453100.t1.1				11.4594	12.7463	29.4519	28.9903	8.46363	8.97535	25.5048	22.733	1.32062	1.71972e-22	1.61699	1.25341e-28	-0.609494	0.002085	-0.387468	0.003125
Cre10.g453850	Cre10.g453850.t1.1				0	0	1.69131	2.88906	0.204042	0	6.21684	4.42233	1.61753	0.00132336	2.56348	3.34653e-09	0.25752	1	0.751447	0.112815
Cre10.g454250	Cre10.g454250.t1.1	FKB16-9	peptidyl-prolyl cis-trans isomerase, FKBP-type	FKBP-type peptidyl-prolyl cis-trans isomerase (EC 5.2.1.8) (PPIase) (Rotamase); possibly targeted to thylakoid lumen (by homology to At5g45680 and presence of a RR motif); [PMID: 15701785]	3.70773	3.46166	0.849875	0.553044	3.55439	4.27607	0.94054	1.07743	-1.13913	0.00389509	-1.09452	0.00995151	-0.055672	1	0.204171	0.930349
Cre10.g456750	Cre10.g456750.t1.1	_	dehydroascorbate reductase	Catalyzes the reduction of dehydroascorbate to ascorbate in environmental stress adaptation. Similar to Arabidopsis At1g19570.1	20.4318	20.3717	41.5645	40.2856	25.284	26.095	42.3428	42.0249	1.05972	6.66764e-13	0.920037	1.61806e-11	0.118938	0.703726	-0.073573	0.796154
Cre10.g457100	Cre10.g457100.t1.1	_	hypothetical protein	_	12.3003	13.143	25.6479	31.782	26.3337	23.6811	126.477	118.127	1.1416	1.90961e-07	2.44757	6.27469e-113	0.679403	0.002077	1.91733	0
Cre10.g458450	Cre10.g458450.t1.2	GPX5	glutathione peroxidase	GPX5 is also named GPXH. GPXH gene expression is induced by singlet oxygen [PMID: 16160847; PMID: 15597886; PMID: 15517390; PMID: 11485197]. Homologous to glutathione peroxidase from other organisms. Probably cytosolic (no obvious N-terminal transit peptide).	150.036	162.602	2171.91	2171.46	312.867	315.032	1116.7	1106.94	3.90814	0	2.0616	0	0.793735	0	-1.08441	0
Cre10.g458700	Cre10.g458700.t1.1				8.45385	8.44713	2.98118	1.93996	7.09718	7.68725	3.95905	2.45661	-1.07024	0.00185469	-0.730693	0.0795831	-0.304402	0.476063	0.165732	0.914133
Cre10.g459200	Cre10.g459200.t1.1	PMA2	plasma membrane-type proton ATPase	Putative plasma membrane-type proton ATPase GI:16751320; Low-CO2 inducible gene revealed by cDNA array analyses; regulated by CCM1 [PMID: 15235119]	245.962	248.186	80.7139	79.2804	78.335	79.1223	44.0563	44.3207	-1.47747	1.09024e-266	-0.582652	3.32004e-19	-1.84215	0	-0.967138	0
Cre10.g459550	Cre10.g459550.t1.2				0.405154	0.296033	2.0431	1.45038	0.717042	1.13894	2.5547	2.82561	1.12643	0.00603553	1.21651	0.00180556	0.503568	0.412943	0.38197	0.494735
Cre10.g459800	Cre10.g459800.t1.1				2.96323	4.81142	14.9429	14.3648	5.46284	2.77667	19.9733	16.7912	1.47649	2.23957e-07	1.9655	4.14686e-13	-0.089879	1	0.179833	0.671557
Cre10.g461250	Cre10.g461250.t1.1	_	N-ethylmaleimide sensitive fusion protein	Expressed protein, similar to NEM-sensitive fusion protein	24.6527	23.3934	57.242	54.537	21.2486	20.1236	93.097	93.6881	1.30179	4.64276e-34	2.36239	1.19099e-150	-0.395448	0.012964	0.613183	0
Cre10.g461319	Cre10.g461319.t1.1				3.08269	3.86131	9.38776	10.3458	6.81969	5.2376	29.5878	30.6172	1.32013	4.18036e-08	2.38479	4.70785e-51	0.463116	0.181997	1.40998	0
Cre10.g461350	Cre10.g461350.t1.2	BUG23	basal body protein	Basal body protein of unknown function; found in basal body proteome [PMID: 15964273]. Transcript upregulated during flagellar regeneration.	3.1395	2.88866	0.159917	0.312191	2.00644	1.50864	0	0.152052	-1.37797	0.000877043	-1.57759	0.00833309	-0.576972	0.224938	-0.48089	0.908243
Cre10.g462650	Cre10.g462650.t1.1				11.572	8.5744	21.6683	21.8799	11.6823	13.9567	26.2244	25.1493	1.09704	5.83456e-08	1.15847	1.24029e-10	0.131217	0.809441	0.111591	0.746441
Cre10.g463050	Cre10.g463050.t1.1				4.22152	3.36494	0.985237	1.37385	4.61859	4.78008	1.93592	1.94047	-1.07561	0.000653314	-0.851376	0.00553681	0.093627	0.920901	0.442471	0.419167
Cre10.g463501	Cre10.g463501.t1.1				5.29593	6.03763	1.54968	1.81518	8.17622	6.82244	0.294	1.277	-1.11779	0.000321048	-2.29488	2.37861e-12	0.165283	0.726478	-0.841714	0.15811
Cre10.g463550	Cre10.g463550.t1.2				1.16302	1.1897	0.373217	0.104085	0.823326	1.45866	0.455179	0.152083	-1.11037	0.00989031	-1.02137	0.1037	-0.189661	0.857307	0.114869	1
Cre10.g463600	Cre10.g463600.t1.1				1.09663	1.03599	3.2906	3.12275	1.52913	1.69588	3.52604	3.56331	1.39216	2.48588e-09	1.23132	1.40121e-08	0.305558	0.456383	0.023161	1
Cre10.g464500	Cre10.g464500.t1.1				27.2024	30.7721	9.27557	8.45033	25.3645	25.5708	7.82103	6.66351	-1.42432	3.03558e-19	-1.46214	1.24195e-17	-0.368309	0.012482	-0.370233	0.212922
Cre10.g464900	Cre10.g464900.t1.1				1.71664	2.61766	0.273727	0.267186	0.594413	1.29116	0.19474	0	-1.45108	6.95194e-05	-1.50632	0.0615694	-0.937044	0.04283	-0.758502	0.583694
Cre10.g466850	Cre10.g466850.t1.1	FKB18	peptidyl-prolyl cis-trans isomerase, FKBP-type	FKBP-type peptidyl-prolyl cis-trans isomerase (EC 5.2.1.8) (PPIase) (Rotamase); probably directed to thylakoid lumen (homology to AtFKBP18 and bipartite cTP: 29 + RR motif); present in thylakoid proteome based on mass spectrometric peptide identification [PMID: 17078018]	94.9695	100.955	36.6507	35.3191	45.5115	45.1468	31.666	32.6284	-1.22792	1.78922e-21	-0.23684	0.28701	-1.25286	0	-0.265417	0.248152
Cre11.g467450	Cre11.g467450.t1.2				1.36318	1.43872	7.6033	5.79495	1.00523	0.58955	2.56879	3.36708	1.64081	6.30318e-09	1.39893	0.000279755	-0.538981	0.322579	-1.06875	0.000268
Cre11.g467500	Cre11.g467500.t1.1	_	predicted protein	significant homology with region of a protein in Arabidopsis of unknown function. pfam05664, DUF810, Protein of unknown function (DUF810). This family consists of several plant proteins of unknown function	4.77255	6.49879	12.5307	12.0371	4.70315	3.89353	13.3958	12.9545	1.16898	2.51998e-13	1.74824	1.92932e-29	-0.515319	0.116057	-0.018101	1
Cre11.g468050	Cre11.g468050.t1.1				69.4926	68.8181	30.4783	26.5442	50.2096	45.6081	42.4945	41.7201	-1.09038	1.34785e-21	0.0586329	0.831372	-0.71184	0	0.430296	0.002736
Cre11.g469600	Cre11.g469600.t1.1				12.6527	13.1363	2.54033	1.9837	5.31214	6.31082	3.93586	3.46204	-1.92384	1.18672e-18	-0.346167	0.338583	-1.1997	0	0.475434	0.252387
Cre11.g471150	Cre11.g471150.t1.1				33.4443	25.1349	5.91377	6.20005	20.2936	18.5966	3.94757	4.78988	-1.70401	8.06036e-08	-1.56535	1.1281e-08	-0.696845	0.01482	-0.440828	0.384159
Cre11.g471500	Cre11.g471500.t1.1	MFT10	predicted protein	related to major facilitator superfamily	14.2093	14.0395	29.4749	28.8607	62.5126	63.8062	109.208	106.654	1.10646	2.28955e-15	1.00658	1.97204e-49	1.87317	0	1.73858	0
Cre11.g471550	Cre11.g471550.t1.1				32.3537	30.6927	73.5114	75.216	34.2222	35.9803	112.555	116.438	1.33929	2.43361e-52	1.92297	5.70363e-155	-0.046407	0.883038	0.498093	0
Cre11.g471950	Cre11.g471950.t1.1	CPR1	cysteine protease-related protein	partial sequence similar to Volvox carteri clone B cysteine protease; belongs to the peptidase C1 family; [PMID: 9596636, Genbank entry AF058717]	13.6653	11.0202	31.9495	29.8951	44.5403	41.3041	83.8554	88.487	1.39158	6.29965e-30	1.23647	1.71804e-73	1.5352	0	1.3409	0
Cre11.g472350	Cre11.g472350.t1.1				50.4523	45.494	163.732	179.141	38.831	40.1887	86.3306	84.8971	1.90175	1.60085e-62	1.3116	2.07573e-27	-0.451388	0.00609	-1.10105	0
Cre11.g472600	Cre11.g472600.t1.2				17.2234	14.9279	41.8204	45.4984	26.3826	24.3498	110.642	108.832	1.48485	2.12523e-30	2.30701	1.08048e-153	0.42607	0.016075	1.19244	0
Cre11.g472900	Cre11.g472900.t1.2				7.49024	6.27102	40.2396	41.1634	5.48891	4.85908	4.17332	4.18314	2.44501	3.71346e-60	-0.0505769	1	-0.498845	0.100977	-3.12174	0
Cre11.g474600	Cre11.g474600.t1.1				0.15032	0.146446	11.6461	12.175	1.66273	1.8203	2.15717	2.22776	3.90236	2.49387e-56	0.442592	0.331845	1.55471	0.000109	-2.25987	0
Cre11.g475500	Cre11.g475500.t1.1				12.9578	17.8275	37.8184	33.6393	20.832	23.2716	49.9826	41.3908	1.28883	2.32659e-12	1.25518	1.66532e-09	0.30969	0.351798	0.22603	0.327024
Cre11.g476250	Cre11.g476250.t1.1				14.6043	14.7143	58.8255	59.1514	9.55447	8.58342	10.6934	11.1538	2.07934	9.1015e-121	0.487682	0.00485639	-0.840911	0	-2.49269	0
Cre11.g478100	Cre11.g478100.t1.1				117.235	122.514	32.8663	35.4994	76.181	82.8513	58.7753	58.1451	-1.56481	4.21854e-33	-0.190234	0.291394	-0.767006	0	0.619834	0.000331
Cre11.g479100	Cre11.g479100.t1.2				1.6806	2.00112	0.627768	0.334236	1.81764	1.9382	0.649626	0.488366	-1.06516	0.00465512	-1.02198	0.0118587	-0.125272	0.885604	0.089225	1
Cre11.g480700	Cre11.g480700.t1.2				10.4208	9.70525	22.1135	20.9986	8.58342	9.80725	20.2355	23.2542	1.16379	1.18672e-18	1.42464	2.71007e-18	-0.309448	0.140249	-0.107394	0.582799
Cre11.g480950	Cre11.g480950.t1.1	_	High mobility group protein	High mobility group protein, ChromDB HMGB3406; a putative chromatin-associated HMGB protein containing a single HMG box	26.0395	23.8308	49.6788	57.4367	48.1794	43.2263	55.3598	59.6174	1.12486	8.44616e-12	0.551531	0.000261863	0.611605	0.001234	-0.014438	1
Cre11.g482000	Cre11.g482000.t1.2	FAP208	Flagella Associated Protein	Flagellar Associated Protein, found in the flagellar proteome [PMID: 15998802]	9.51612	9.82849	2.16486	3.71398	10.5735	10.7685	5.35167	5.42663	-1.36389	2.82674e-10	-0.683401	0.000695212	-0.05646	0.930327	0.693331	0.036831
Cre11.g482650	Cre11.g482650.t1.2				1.06264	1.42346	4.74969	7.84587	7.16999	7.12333	55.3366	57.8985	1.57363	0.00198765	3.02228	2.07511e-104	1.58284	1e-06	2.88228	0
Cre11.g483100	Cre11.g483100.t1.2				0.649891	0.569826	3.21767	3.31527	0.575089	0.674558	0.395659	0.169967	1.6639	2.64925e-08	-0.490774	0.545234	-0.08796	1	-2.46168	0
Cre12.g485400	Cre12.g485400.t1.2				0.241477	0.235253	3.32103	2.7014	0.641049	1.14878	9.1358	8.73627	1.70349	2.71258e-06	2.6429	2.89288e-20	0.603592	0.31716	1.21954	1.3e-05
Cre12.g486700	Cre12.g486700.t1.1	FAP271	Flagellar Associated Protein	Flagellar Associated Protein; found in the flagellar proteome [PMID: 15998802]; transcript upregulated during flagellar regeneration [PMID: 15738400]	5.72732	6.39624	2.17733	1.75024	4.57366	4.10813	3.64478	2.80091	-1.0055	0.00239643	-0.148487	0.887028	-0.525324	0.126276	0.418886	0.449061
Cre12.g487850	Cre12.g487850.t1.1	CGL49	ARF/SAR superfamily small monomeric GTP binding protein	Expressed Protein. Similar to the ArfB-type GTPase, involved in vesicle trafficking in the late secretory system	186.354	202.079	358.629	364.596	133.439	138.596	348.78	355.341	1.02495	3.60145e-68	1.60181	7.86906e-155	-0.70401	0	-0.157685	0.005979
Cre12.g489700	Cre12.g489700.t1.1	OTC1	Ornithine carbamoyltransferase	Ornithine carbamoyltransferase (OTC) (ARG3 in yeast); chloroplast-targeted (by homology to At1g75330); arg4 is probably a mutant in that gene; note however that arg4 is not rescued by citrulline, whereas an OTC mutant should	14.9377	16.122	5.90801	6.16003	23.3265	25.5877	12.2274	9.31983	-1.01612	1.17336e-05	-0.877351	4.16297e-06	0.413433	0.040793	0.612055	0.030608
Cre12.g492600	Cre12.g492600.t1.1	FAS3	fasciclin-like protein	similar to fasciclin/TGFbeta-induced protein/Volvox CAM (algal-CAM) [PMID: 7925267]; contains 3 (!) FAS1 (BIgH3) domains, involved in cell recognition; probably extracellular, GPI-anchored (by homology)	12.2138	11.5685	3.83651	4.55453	0.700521	1.27165	0.983582	1.97179	-1.12435	1.50931e-06	0.48528	0.511732	-2.76046	0	-1.23907	0.000645
Cre12.g492650	Cre12.g492650.t1.1	FAS2	fasciclin-like protein	similar to periostin/fasciclin/TGFbeta-induced protein; contains 4 FAS1 (BIgH3) domains, involved in cell recognition; probably extracellular, GPI-anchored (by homology)	10.2931	11.4603	176.903	183.674	4.74006	4.36072	4.11068	4.02879	4.0103	0	0.070594	0.982895	-1.23736	0	-5.30079	0
Cre12.g497950	Cre12.g497950.t1.1				3.90117	1.90031	13.4132	14.4892	10.7017	8.43591	65.9928	62.407	1.7661	6.81171e-11	2.77766	5.50749e-74	1.11684	0.00073	1.96419	0
Cre12.g498000	Cre12.g498000.t1.2				1.8056	3.1663	6.8427	7.86421	8.20191	8.74593	20.6242	20.8826	1.27908	6.37483e-06	1.42026	6.76965e-16	1.23426	1.9e-05	1.27134	0
Cre12.g499300	Cre12.g499300.t1.1				16.1227	14.1748	5.28802	3.75393	8.00346	6.23582	2.62207	1.71407	-1.33081	4.25022e-09	-1.16311	0.000301649	-1.12621	0	-0.893917	0.016738
Cre12.g500450	Cre12.g500450.t1.2				1.38121	1.56987	3.51773	4.12041	2.51236	2.5885	7.07415	9.16452	1.07887	0.000340452	1.65488	1.48588e-08	0.414639	0.353092	0.859892	0.001664
Cre12.g500500	Cre12.g500500.t1.2	SMT1	sterol-C24-methyltransferase	Similar to sterol-C24-Methyltransferase from arabidopsis	233.27	242.807	604.909	594.026	269.706	262.434	480.775	487.392	1.46333	9.2928e-281	1.10411	2.016e-165	-0.042129	0.641074	-0.427227	0
Cre12.g502600	Cre12.g502600.t1.1	SLT1	sodium/sulfate co-transporter	SAC1-like transporter 1, putative sodium/sulfate co-transporter, transcript is up-regulated during sulfur-deprivation; related to the SAC1 protein which regulates sulfur-deficiency responses [PMID: 16307308]	10.0071	7.67649	2.09512	2.6092	11.8535	9.67807	3.5636	3.09114	-1.4305	7.7909e-07	-1.29312	5.80905e-09	0.077825	0.938734	0.313639	0.510165
Cre12.g503300	Cre12.g503300.t1.1	_	Phosphoribosylaminoimidazole carboxylase, eukaryotic-type	Phosphoribosylaminoimidazole carboxylase is a bifunctional fusion protein in plants, animals and fungi, but consists of two non-interacting proteins in bacteria, PurK and PurE. This is the eukaryotic type, probably directed to chloroplast (by homology to At2g37690). There is also a bacterial-type pathway leading to CAIR (PurK, PurE).	45.7283	49.4112	14.2252	15.1845	38.0564	39.7102	17.2026	18.034	-1.47834	4.29024e-38	-0.869583	1.06868e-13	-0.480522	1e-06	0.134644	0.608677
Cre12.g503600	Cre12.g503600.t1.1				22.652	23.1903	43.4739	46.7302	14.0993	13.7816	34.0595	28.617	1.02762	2.02603e-11	1.30007	9.78551e-13	-0.814484	8e-05	-0.621648	3.8e-05
Cre12.g503900	Cre12.g503900.t1.1	_	hypothetical protein	_	1.80141	2.19373	7.01954	6.8518	2.59036	2.33723	23.501	23.7526	1.16379	0.000958003	2.77211	3.29563e-28	0.054098	1	1.43315	0
Cre12.g503950	Cre12.g503950.t1.1	_	phosphatidylinositol phosphatidylcholine transfer protein	Putative phosphatidylinositol/phosphatidylcholine transfer protein SEC14; related to cellular retinaldehyde binding/alpha-tocopherol transport	28.798	30.1163	268.962	272.437	14.8293	17.0283	18.6786	15.3185	3.23675	0	0.308416	0.220872	-0.999492	0	-4.00649	0
Cre12.g505650	Cre12.g505650.t1.1				25.8995	24.682	49.5634	55.2633	25.2291	23.5619	29.5839	28.7307	1.1561	1.14771e-23	0.491074	4.86025e-06	-0.246808	0.064168	-0.948674	0
Cre12.g505800	Cre12.g505800.t1.2	MSCL2	predicted protein	protein of unknown function with mechanosensitive ion channel (MSC) like domain; partial sequence	5.24588	4.05114	29.7385	32.2914	5.37802	6.08687	21.9221	19.1294	2.66035	2.45308e-90	1.97283	7.61109e-32	0.093411	0.883813	-0.701706	0
Cre12.g507450	Cre12.g507450.t1.1	SYP4	Qa-SNARE protein, Tlg2/Syntaxin16-family	Expressed Protein. Similar to SYP4/syntaxin 16/Tlg2p Qa-SNAREs, involved in Trans-Golgi Network trafficking.	9.67552	10.1512	25.0781	20.3158	15.4772	15.7723	39.3242	40.7144	1.13382	7.29318e-08	1.49878	5.90353e-21	0.385603	0.19209	0.669465	5.6e-05
Cre12.g507895	Cre12.g507895.t1.1				23.242	21.2387	7.59885	7.25602	4.46412	5.14274	3.44737	5.18323	-1.20981	2.81249e-08	0.0529872	1	-1.9899	0	-0.738183	0.041419
Cre12.g508350	Cre12.g508350.t1.1	TPR2	predicted protein	TPR protein, strong similarity to rice protein BAB93301 and cyanobacterial proteins. Mitochondrial targeting predicted by multiple programs. Arabidopsis homolog is plastid predicted	14.0705	11.677	1.43342	3.49791	5.30319	4.50757	3.62591	4.99736	-1.49593	2.67572e-06	0.0340402	1	-1.17035	7.8e-05	0.486177	0.490005
Cre12.g508550	Cre12.g508550.t1.2	PANB	Ketopantoate hydroxymethyltransferase	Ketopantoate hydroxymethyltransferase (KPHMT)	1.7934	1.56326	10.0389	9.12326	3.84217	3.51066	30.8669	27.895	2.01985	3.09959e-17	2.96742	1.21812e-76	0.66097	0.074023	1.42431	0
Cre12.g508900	Cre12.g508900.t1.1	MAPK6	Mitogen-Activated Protein Kinase 6	Downstream kinase in the canonical MAP kinase pathway	85.914	88.8558	40.5144	36.0213	38.2305	36.8368	34.1493	34.2296	-1.02179	9.98814e-28	0.107264	0.594309	-1.38357	0	-0.271955	0.052348
Cre12.g509250	Cre12.g509250.t1.1	EYE2	thioredoxin superfamily protein	EYE2 is a thioredoxin superfamily protein required for eyespot assembly; EYE2 contains a LysM domain; the conserved thioredoxin active site cys residues are not required for eyespot assembly, suggestive of a chaperonin-type function; PMID: 11454753; Genbank entry AF233430	2.59549	2.41366	0.108169	0.633506	3.96712	2.44909	1.94954	1.85128	-1.30932	0.00195542	-0.348199	0.49945	0.085747	0.954058	1.29929	0.014252
Cre12.g511650	Cre12.g511650.t1.2				15.0204	14.0271	28.9287	27.9193	13.0556	11.8389	47.1526	46.4113	1.04289	3.27473e-15	2.08176	9.27955e-78	-0.394482	0.037958	0.586476	0
Cre12.g512950	Cre12.g512950.t1.1				77.9753	77.7083	32.2249	29.9481	6.89073	5.82527	4.02693	4.77029	-1.1492	5.20592e-35	-0.245141	0.571621	-3.56114	0	-2.70806	0
Cre12.g513450	Cre12.g513450.t1.1	TUH	Eta tubulin	similar to eta-tubulin from Paramecium [gi:9501681]	2.74678	2.27954	5.50324	6.82847	4.86125	4.9277	10.706	9.57825	1.07633	0.000112976	1.14798	2.38905e-07	0.577589	0.099267	0.54405	0.032503
Cre12.g513900	Cre12.g513900.t1.2				2.37525	2.80353	0.628208	0.531437	2.30396	2.52861	1.15209	0.756592	-1.38885	2.47367e-06	-0.894802	0.0072489	-0.247667	0.506286	0.398959	0.479722
Cre12.g516841	Cre12.g516841.t1.1				14.9125	16.0847	3.9065	3.33651	9.42574	3.22468	0	3.71436	-1.11661	0.00254634	-1.09647	0.557975	-1.03625	0.006556	-0.879869	0.571438
Cre12.g517050	Cre12.g517050.t1.1	FAP117	Flagellar Associated Protein	Flagellar Associated Protein, found in the flagellar proteome [PMID: 15998802]	27.2933	27.4762	10.4268	7.59932	16.3696	19.2796	8.70382	8.7243	-1.30086	2.95051e-12	-0.707409	0.00170761	-0.762169	8e-06	-0.133577	0.7971
Cre12.g517400	Cre12.g517400.t1.1	RABF1	small Rab-related GTPase	Expressed Protein. Similar to the RabF/Rab5 type of small GTPase, involved in vesicle trafficking in the endosomal system; Found in the flagellar proteome [PMID: 15998802]	114.223	120.65	228.195	230.274	105.154	102.958	163.828	166.834	1.08546	6.83295e-53	0.900285	6.93041e-32	-0.368809	9.7e-05	-0.586058	0
Cre12.g517450	Cre12.g517450.t1.2	_	Type I metacaspase	Putative metacaspase type I [PMID: 11090634]	4.69917	4.12024	15.7261	14.6143	8.52451	8.23083	25.5437	25.2965	1.60429	2.25634e-14	1.7177	5.90944e-26	0.592511	0.04302	0.594731	0.000314
Cre12.g518700	Cre12.g518700.t1.2				3.47845	3.38879	0.245329	0.7184	1.18388	0.694322	0	0	-1.38373	0.000323357	-1.60875	0.0186257	-1.22992	0.000827	-1.23823	0.120732
Cre12.g521600	Cre12.g521600.t1.2				11.6974	10.6836	30.1639	32.2238	9.54233	12.0149	127.169	122.688	1.4221	8.57827e-15	3.5867	1.47445e-196	-0.221024	0.584104	1.83227	0
Cre12.g522700	Cre12.g522700.t1.1				0.629153	0.278608	2.62205	1.79157	1.11348	1.03892	4.27804	5.73409	1.49307	0.000136115	2.01185	5.44872e-09	0.627646	0.220033	0.933302	0.009384
Cre12.g525200	Cre12.g525200.t1.1	NOP56	Nucleolar protein, Component of C/D snoRNPs	Structural Component of C/D snoRNPs. Required for pre-Ribosomal RNA processing and snoRNA guided pre-rRNA methylation	57.1303	61.3006	25.7077	24.5044	46.8272	47.3661	20.9513	18.5907	-1.04576	5.06712e-19	-0.97134	7.00943e-14	-0.516435	1e-06	-0.443809	0.010607
Cre12.g528850	Cre12.g528850.t1.1	DLC3	Flagellar outer dynein arm 16 kDa light chain LC3	outer dynein arm light chain 3	45.0776	38.585	16.7232	17.0232	41.5033	42.1458	38.0721	33.1643	-1.02583	9.55528e-08	0.00947033	1	-0.185197	0.420274	0.874708	2.3e-05
Cre12.g531400	Cre12.g531400.t1.2	NPH4	nephrocystin-4-like protein	Found in basal body proteome as POC10 [PMID: 15964273]. Mammalian homolog is NPHP-4, also known as nephroretinin, gene mutated in Senior-Loken syndrome.	0.210126	0.122826	0.770632	0.789828	0.520635	0.254452	1.13306	1.35555	1.14448	0.004913	1.35134	0.000319338	0.427997	0.502896	0.413774	0.404483
Cre12.g535250	Cre12.g535250.t1.2				8.97016	9.78241	2.27093	2.63603	6.1606	5.96389	1.6884	1.40058	-1.50558	7.80002e-13	-1.45648	2.14657e-08	-0.749777	8.9e-05	-0.620936	0.10487
Cre12.g536000	Cre12.g536000.t1.1	ALA2	ATPase, aminophospholipid transporter	phospholipid-translocating P-type ATPase, flippase	12.2444	11.4823	26.8955	25.6668	16.4554	14.782	42.1414	39.7861	1.22115	4.26759e-24	1.59811	5.32172e-62	0.181429	0.36765	0.511183	0
Cre12.g536650	Cre12.g536650.t1.1				0	0.139591	2.62744	1.79526	0.253584	0.24787	0.49847	0.374732	1.72051	8.53497e-05	0.347558	0.790126	0.431687	0.90212	-1.29317	0.005404
Cre12.g536750	Cre12.g536750.t1.1				107.844	103.436	209.778	196.713	73.7061	70.4888	172.721	163.714	1.06935	1.87189e-56	1.45105	4.45541e-109	-0.740443	0	-0.39017	0
Cre12.g537200	Cre12.g537200.t1.1	OGD1	2-oxoglutarate dehydrogenase, E1 subunit	Probable 2-oxoglutarate dehydrogenase (alpha-ketoglutarate dehydrogenase) E1 subunit (EC 1.2.4.2); mitochondrial location predicted by Target-P	169.413	161.825	301.563	311.56	95.7157	96.6579	111.211	109.191	1.02349	4.92635e-143	0.438477	5.74868e-17	-0.979875	0	-1.59027	0
Cre12.g537225	Cre12.g537225.t1.1				41.5011	45.5309	227.62	213.481	71.7944	77.2915	414.925	411.664	2.34136	2.72433e-91	2.65824	3.66555e-220	0.530778	0.002979	0.778258	0
Cre12.g537227	Cre12.g537227.t1.1				15.1331	14.8582	57.0177	61.6863	20.7146	20.7592	204.519	197.683	2.00204	2.16914e-63	3.45083	0	0.244368	0.273185	1.62517	0
Cre12.g537250	Cre12.g537250.t1.1				15.6859	16.4972	1.08954	1.22303	14.0382	11.6662	1.39525	1.55392	-3.02652	4.62793e-59	-2.54119	1.38473e-24	-0.506649	0.000335	0.171841	0.860774
Cre12.g540150	Cre12.g540150.t1.2				5.03581	5.51927	15.0058	16.0556	2.2281	2.72237	1.64242	1.3719	1.19074	7.58071e-05	-0.235133	0.864795	-0.722986	0.105618	-2.34693	0
Cre12.g541550	Cre12.g541550.t1.1				39.741	37.3277	1.63396	1.59491	4.73096	5.24095	2.01493	2.01967	-3.34603	8.50032e-56	-0.742324	0.0875779	-2.69551	0	0.121487	0.995282
Cre12.g545850	Cre12.g545850.t1.1				9.08453	8.56488	3.62728	1.83587	8.03891	5.32301	4.71514	4.98171	-1.1656	9.81008e-05	-0.158273	0.774886	-0.514561	0.099453	0.584219	0.208468
Cre12.g547100	Cre12.g547100.t1.2	CGL2	methyltransferase	Strong homology to methyltransferase in Arabidopsis, rice and cyanobacteria - COG2226, UbiE, Methylase involved in ubiquinone/menaquinone biosynthesis [Coenzyme metabolism]	151.951	147.651	58.5751	48.731	79.4939	73.4521	39.4927	33.9306	-1.30469	4.93485e-44	-0.789862	1.24029e-10	-1.14689	0	-0.640414	0.001429
Cre12.g547600	Cre12.g547600.t1.2				1.50104	1.75482	0.412877	0.537348	2.61227	1.29835	0.435165	0.741521	-1.00341	0.00597635	-1.05414	0.170484	-0.002492	1	0.098641	1
Cre12.g548300	Cre12.g548300.t1.1				0	0.725572	4.09712	3.99922	1.53777	1.50313	4.31829	4.54488	1.59613	0.000522267	1.07687	0.0149629	0.822076	0.362968	0.007272	1
Cre12.g548955	Cre12.g548955.t1.1				4.42132	8.13613	14.4134	18.9052	12.172	13.1725	14.0996	14.1327	1.01138	0.00430955	0.310368	0.559951	0.547159	0.255726	-0.277554	0.583694
Cre12.g550800	Cre12.g550800.t1.2	REV1	Deoxycytidyl transferase	Homologous to eukaryotic Rev1; UV-revertible gene 1 product; constitutes the complex with translesion DNA polymerase, Polz; nuclear; functions in translesion synthesis (TLS) of damaged DNA.	1.40931	1.37298	2.79271	3.66176	1.12641	1.10103	2.21419	2.65536	1.04843	5.71125e-05	1.1113	0.000147079	-0.376786	0.391769	-0.457458	0.120146
Cre12.g551700	Cre12.g551700.t1.1				10.6451	11.6769	3.02394	2.95168	5.62346	5.07928	3.38151	3.76348	-1.64657	1.5157e-36	-0.320578	0.0942542	-1.20996	0	0.12715	0.717676
Cre12.g551750	Cre12.g551750.t1.2				2.17733	2.72728	7.98531	8.07287	1.92673	2.4214	6.49263	6.91465	1.29876	1.1637e-05	1.41113	1.1785e-05	-0.228031	0.766405	-0.324502	0.407897
Cre12.g553000	Cre12.g553000.t1.1				7.01621	8.88597	27.0183	28.8844	22.972	29.13	68.9546	75.845	1.26628	8.94261e-05	1.5093	2.10888e-11	1.00259	0.004758	1.10568	4e-06
Cre12.g553650	Cre12.g553650.t1.2				3.2271	4.1919	0.92826	1.1326	3.13563	3.44811	0.880532	0.827441	-1.21446	3.09004e-05	-1.30178	5.91215e-05	-0.302621	0.369383	-0.260311	0.750294
Cre12.g554350	Cre12.g554350.t1.1				18.4439	18.8866	45.3007	45.4231	12.8662	10.3638	16.3924	19.1303	1.33086	1.1767e-23	0.79481	4.08937e-05	-0.804664	3.3e-05	-1.41597	0
Cre12.g556750	Cre12.g556750.t1.2	Tic32-like 1	Short-chain dehydrogenase, classical family, similar to PsTic32	Similar to Tic32 from Pisum sativum (AAS38575); belongs to the classical family of short chain dehydrogenases [PMID: 15180984]; lacks a calmodulin-binding domain [PMID: 17035502]	1.08806	1.36288	6.27067	7.79015	4.26394	3.76452	11.8965	13.0085	1.65689	7.77761e-08	1.57737	3.69609e-10	0.903913	0.025699	0.624006	0.025488
Cre12.g557150	Cre12.g557150.t1.1				41.9204	44.5303	99.5617	92.6625	28.3802	25.9933	78.1897	82.1162	1.22216	5.58752e-23	1.71794	1.21783e-36	-0.799941	4e-06	-0.371973	0.001848
Cre12.g557900	Cre12.g557900.t1.1	CDI1	C-8,7 sterol isomerase	Probable 3-beta-hydroxysteroid-delta(8),delta(7)-isomerase (EC 5.3.3.5) (C-8,7 sterol isomerase) (Cholesterol delta-isomerase) (Delta8-delta7 sterol isomerase) (D8-D7 sterol isomerase) (EBP)	50.6647	57.0369	149.475	159.204	64.1614	55.5092	141.006	130.345	1.60074	1.72035e-60	1.39578	2.11275e-42	-0.04991	0.901959	-0.302094	0.000551
Cre12.g558321	Cre12.g558321.t1.1				3.38238	4.89827	1.42487	1.06357	2.50771	4.1117	0.556546	1.51418	-1.06858	0.00217173	-1.07963	0.101931	-0.4209	0.442791	-0.309872	0.841273
Cre12.g559100	Cre12.g559100.t1.1				3.62563	5.37506	15.6094	18.1991	4.88224	4.22683	12.6132	9.48218	1.65674	4.58493e-13	1.26988	1.84539e-05	-0.121536	0.866836	-0.675864	0.002945
Cre13.g561800	Cre13.g561800.t1.2				0.594724	0.786322	2.02534	1.74883	1.95472	1.91068	3.06654	4.40694	1.10024	0.000487379	1.03137	0.00695496	0.924497	0.00605	0.746533	0.048791
Cre13.g563000	Cre13.g563000.t1.1				72.3439	70.8561	19.5088	20.4275	40.7382	43.5012	30.282	33.7259	-1.48741	1.28673e-15	-0.139569	0.721904	-0.891302	0	0.495527	0.077706
Cre13.g563400	Cre13.g563400.t1.2				3.64771	2.8627	0.836117	0.846365	2.27146	2.16185	0.969378	1.17777	-1.41861	1.44804e-08	-0.680216	0.0266182	-0.650313	0.00459	0.177216	0.821331
Cre13.g564900	Cre13.g564900.t1.1				9.76453	8.57147	82.3003	83.5197	7.24554	7.78611	7.74053	8.51244	3.21569	0	0.337413	0.0818311	-0.453493	0.009968	-3.39957	0
Cre13.g565600	Cre13.g565600.t1.2				3.06556	3.70744	9.5952	9.17671	2.71272	2.46873	7.81472	9.58403	1.29189	8.84121e-08	1.66331	2.78804e-11	-0.423188	0.301945	-0.214656	0.536911
Cre13.g566850	Cre13.g566850.t1.1	SOUL2	SOUL heme-binding protein	similar to plant SOUL protein, putative heme-binding domain; found in Chlamydomonas phosphoproteome [PMID: 16524901]; peptide data at N-term of model suggests that phosphorylation interferes with N-terminal Met cleavage: normally the MSSI... sequence should be matured to Ac-SSI	57.9214	67.207	2748	2740.19	9.02236	10.1326	22.4521	23.4505	5.52581	0	1.33435	1.1539e-09	-2.59703	0	-6.90419	0
Cre13.g566900	Cre13.g566900.t1.2				0.0854078	0.194148	2.58415	2.42049	0.151155	0.172374	0.0495209	0.0992748	2.76119	2.27977e-24	-0.382038	0.732221	0.030223	1	-3.45402	0
Cre13.g568600	Cre13.g568600.t1.2				9.48543	8.97438	3.17771	2.53039	2.34054	3.0767	1.58649	1.35169	-1.26002	1.19699e-07	-0.464299	0.326939	-1.62512	0	-0.800374	0.040247
Cre13.g570600	Cre13.g570600.t1.1	CTR1	CTR type copper ion transporter	CTR type copper ion transporter	5.49507	5.07654	16.244	17.3821	4.27573	4.99888	7.99281	7.84643	1.58264	4.75593e-18	0.898555	0.000212745	-0.323262	0.366322	-1.1243	0
Cre13.g571500	Cre13.g571500.t1.1	CST2	membrane transporter	transmembrane protein; shows similarity to various transporters and permeases; highly expressed; small gene family appears specific to Chlamydomonas	196.828	175.833	546.824	571.702	198.276	189.302	328.159	321.91	1.70791	4.77007e-147	0.982781	2.09485e-60	-0.142462	0.266726	-0.898068	0
Cre13.g571800	Cre13.g571800.t1.2				7.60618	6.72874	34.5486	36.9311	4.7966	6.50343	8.82038	7.62167	2.2683	1.03031e-62	0.716268	0.00234313	-0.47955	0.076815	-2.13964	0
Cre13.g572200	Cre13.g572200.t1.1	_	tyrosine/tryptophan transporter protein	similar to Mtr/TnaB/TyrO permease family protein	10.4063	11.7152	29.0478	28.3537	14.4268	15.1019	47.3652	43.747	1.38716	2.72866e-19	1.79351	1.00635e-47	0.194092	0.506286	0.530697	9e-06
Cre13.g572800	Cre13.g572800.t1.2				3.16896	3.48308	0.521503	0.872642	1.07854	1.26509	0.777369	0.92087	-1.3314	6.30336e-05	-0.139285	0.942866	-1.18926	0.000173	0.113065	1
Cre13.g573800	Cre13.g573800.t1.1				18.4127	19.2337	7.6907	6.68299	12.4916	13.4489	7.82907	8.02584	-1.11411	8.33496e-10	-0.42661	0.0664662	-0.685481	4.8e-05	0.022181	1
Cre13.g576150	Cre13.g576150.t1.2				10.0611	9.72465	3.41388	3.61591	3.71548	4.317	1.51582	1.45033	-1.1434	1.28935e-07	-0.939276	0.00441836	-1.30624	0	-1.07021	0.001204
Cre13.g577950	Cre13.g577950.t1.1	VPS60	subunit of the ESCRT-III complex	Expressed Protein. Similar to VPS60, a SNF7-domain protein, component of the ESCRT-III complex involved in the ubiquitin-mediated internalization into the multi-vesicular bodies (late endosomes); exons missing in sequence gap supported by cDNA	60.1143	55.9575	143.266	154.951	50.8269	42.2027	153.984	151.834	1.4526	5.07122e-55	1.92214	4.58889e-96	-0.50249	0.000292	-0.081559	0.478048
Cre13.g579450	Cre13.g579450.t1.2	CST1	membrane transporter	transmembrane protein; shows similarity to various transporters and permeases; highly expressed; small gene family appears specific to Chlamydomonas	65.9263	62.7632	287.591	293.83	257.287	275.696	534.173	525.441	2.26599	2.54105e-218	1.23137	3.70351e-177	1.81149	0	0.742826	0
Cre13.g580000	Cre13.g580000.t1.1				534.598	508.925	1200.35	1218.25	792.897	808.101	2105.7	2131.66	1.34455	3.22519e-237	1.6453	0	0.412043	0	0.687863	0
Cre13.g581200	Cre13.g581200.t1.2				14.908	14.6329	4.72749	6.82147	12.3986	11.7314	4.87437	4.69041	-1.05746	8.23986e-07	-0.96523	3.86385e-05	-0.449506	0.030791	-0.315652	0.406527
Cre13.g583300	Cre13.g583300.t1.1				0.730811	0.915396	5.83907	6.54045	1.01623	1.35455	0.635605	0.455072	1.97541	6.58661e-12	-0.476289	0.495441	0.165701	0.90791	-2.52298	0
Cre13.g583450	Cre13.g583450.t1.1	_	predicted protein	Unknown protein, contains a cysteine-rich domain. This corresponds to the never published Class VIII zygote-specific cDNA identified by G. Matters in the Goodenough lab (Genbank AF231332, AF231333). However, the EST evidence suggests there is expression under other conditions.	13.1824	12.6759	108.622	108.018	19.2399	22.3604	178.379	163.128	2.98116	4.37462e-133	3.18473	3.99554e-127	0.425667	0.070836	0.529366	0
Cre13.g585000	Cre13.g585000.t1.1	_	expressed hypothetical protein	protein sequence highly similar to 5' adjacent gene	5.28228	5.14612	14.7657	14.2975	1.48209	2.3402	29.9179	29.7636	1.34608	7.08961e-10	3.59855	1.50622e-73	-1.16613	0.000306	0.871113	0
Cre13.g585600	Cre13.g585600.t1.2				9.09306	8.0582	2.91297	2.5002	6.25297	5.82779	1.19103	1.05058	-1.3161	2.70105e-11	-1.84319	7.95305e-14	-0.646601	0.000408	-1.1099	0.000446
Cre13.g586450	Cre13.g586450.t1.1				42.6064	40.728	371.553	364.681	65.6249	59.7128	290.317	290.721	3.21022	0	2.42992	0	0.369838	0.004016	-0.459377	0
Cre13.g587300	Cre13.g587300.t1.2				4.85428	5.1045	1.27164	1.17229	5.65923	6.26483	2.61355	3.22425	-1.35787	1.50947e-06	-0.682343	0.0157609	0.047494	0.994696	0.858905	0.021248
Cre13.g588047	Cre13.g588047.t1.1				6.98104	7.70791	1.70685	1.24955	2.67693	4.22683	2.42863	0.811449	-1.24492	0.000487313	-0.556755	0.478375	-0.887305	0.013731	-0.053005	1
Cre13.g588150	Cre13.g588150.t1.1				18.4014	17.9271	64.9694	60.0966	36.0467	34.1435	102.607	103.625	1.8593	1.98046e-87	1.77916	8.58897e-158	0.719748	0	0.597819	0
Cre13.g588650	Cre13.g588650.t1.1				16.8814	18.2199	33.9909	34.808	48.8426	46.239	44.1186	46.8194	1.05937	1.11596e-19	0.177728	0.0931191	1.19089	0	0.276956	0.008695
Cre13.g591550	Cre13.g591550.t1.2	SRR20	Scavenger receptor cysteine rich (SRCR) protein	Scavenger receptor cysteine-rich protein; contains ligand-binding SRCR domain found in speract/scavenger receptor (PMID: 14995912)	4.37411	4.26137	1.12294	1.25269	2.63205	2.49707	0.760855	0.83891	-1.17713	0.000163216	-0.984649	0.0163327	-0.737578	0.016256	-0.428249	0.517478
Cre13.g591850	Cre13.g591850.t1.2				12.8993	13.1558	25.8714	28.1392	17.4785	16.9104	25.7682	22.6661	1.03591	2.15541e-07	0.677225	0.000897962	0.169948	0.664493	-0.260999	0.274742
Cre13.g593050	Cre13.g593050.t1.2				4.83879	3.27212	0.991694	1.32463	4.33222	5.7118	1.8319	1.48882	-1.23698	0.00274661	-1.14916	0.00011615	0.101616	0.953365	0.307587	0.606611
Cre13.g593700	Cre13.g593700.t1.1	_	monooxygenase, DBH-like	Similar to copper type II, ascorbate-dependent monooxygenase	30.3807	31.7786	73.0097	68.88	19.4319	21.7602	51.4551	51.6691	1.28675	9.17004e-42	1.52408	5.01706e-45	-0.758382	0	-0.570779	0
Cre13.g593850	Cre13.g593850.t1.2				2.51102	2.79576	5.92012	6.90228	4.28529	4.34387	16.4572	18.2941	1.09874	2.71306e-05	2.0527	1.11274e-30	0.385701	0.320963	1.22842	0
Cre13.g593869	Cre13.g593869.t1.1				3.87816	5.00056	10.0398	10.3103	3.7346	4.73572	12.3013	13.2252	1.09583	5.54387e-06	1.61855	1.59335e-13	-0.208224	0.679241	0.190083	0.553131
Cre13.g594250	Cre13.g594250.t1.1				36.1887	34.8286	141.167	134.26	35.905	37.5622	100.145	93.8801	1.9984	1.24845e-77	1.59044	2.4145e-44	-0.143628	0.575604	-0.615272	0
Cre13.g594400	Cre13.g594400.t1.2				1.83011	3.56589	9.06105	9.82726	6.36991	6.96511	16.0231	15.4226	1.51635	7.30151e-09	1.34026	2.1809e-11	0.873941	0.008123	0.56762	0.009495
Cre13.g594450	Cre13.g594450.t1.1				1.68516	1.77854	7.27471	7.16372	4.84641	4.98014	14.412	12.3647	1.73578	8.70202e-14	1.56256	3.46465e-20	1.02123	0.000292	0.722256	3.4e-05
Cre13.g594650	Cre13.g594650.t1.1	_	BPI/LBP/CETP N-terminal domain protein	Expressed Protein of unknown function. Contains BPI/LBP/CETP N-terminal domain.	47.1659	52.592	110.345	111.07	22.6538	26.8368	61.3506	67.0744	1.25693	1.83437e-47	1.57224	6.81982e-39	-1.15846	0	-0.893926	0
Cre13.g595500	Cre13.g595500.t1.1				12.1784	10.0611	24.0291	23.4549	42.3306	41.7982	75.0749	74.9118	1.14129	7.07708e-14	1.06206	2.34194e-39	1.62649	0	1.50757	0
Cre13.g597100	Cre13.g597100.t1.1				1.12911	1.18463	0.159269	0.155463	1.1913	1.4274	0.377699	0.567882	-1.3816	0.000185332	-0.87121	0.0362645	-0.020789	1	0.739157	0.209448
Cre13.g598500	Cre13.g598500.t1.1				11.5163	10.2758	25.7558	22.2507	11.9051	11.9161	41.5618	41.5657	1.16626	2.0077e-13	1.95702	3.26105e-53	-0.065208	0.924752	0.65617	0
Cre13.g600650	Cre13.g600650.t1.1				5.83182	5.7778	175.092	177.542	7.2598	9.74662	26.392	21.5424	4.75635	0	1.64024	1.20236e-10	0.286163	0.341678	-2.95915	0
Cre13.g600700	Cre13.g600700.t1.1				7.1123	7.05496	109.079	111.218	18.881	16.4423	43.975	43.0639	3.78293	2.92603e-228	1.48441	7.31326e-31	0.974797	4e-06	-1.43508	0
Cre13.g601050	Cre13.g601050.t1.2				10.8715	8.77564	3.7023	3.68333	5.22239	6.78391	2.02612	2.03089	-1.07434	5.04597e-07	-1.09991	4.87066e-05	-0.81575	0.001434	-0.801369	0.014536
Cre13.g602500	Cre13.g602500.t1.2				6.75518	6.58107	23.9838	25.9832	7.75824	8.32935	38.126	37.8398	1.76407	5.57773e-21	2.30175	2.43405e-47	0.054461	0.996178	0.46654	0.002021
Cre13.g603550	Cre13.g603550.t1.1				5.07134	5.06414	0.92995	1.47506	6.73145	7.23776	1.654	1.76842	-1.23281	0.000253553	-1.37278	1.51593e-05	0.208246	0.646541	0.257615	0.823598
Cre13.g604700	Cre13.g604700.t1.2				5.89645	7.49279	14.4559	15.3724	15.313	12.4179	30.8813	33.4124	1.10768	2.52537e-07	1.38642	3.55167e-21	0.731913	0.002067	0.939248	0
Cre13.g606200	Cre13.g606200.t1.2				1.22514	1.02305	0	0.0783175	1.08412	1.13539	0.456657	0.228865	-1.49672	0.00177874	-0.786515	0.177304	-0.125792	0.954058	0.936303	0.315333
Cre13.g607450	Cre13.g607450.t1.2	DAK1	dihydroxyacetone kinase	contains Pfam domains, PF02733: DAK1 domain and PF02734: DAK2 domain	4.43678	3.68987	9.42572	9.00679	3.7346	5.24167	8.56462	7.73572	1.07271	1.16299e-05	0.970382	0.000160463	-0.055406	1	-0.270123	0.390881
Cre13.g607850	Cre13.g607850.t1.1				3.28429	3.63202	1.22078	0.953288	9.58284	9.21337	1.69842	1.7798	-1.00135	0.00361966	-1.83453	2.50995e-13	1.04641	1e-05	0.385689	0.544002
Cre14.g609350	Cre14.g609350.t1.2				10.3586	10.7194	4.22616	3.68161	6.57873	5.5731	2.1553	2.59245	-1.15183	1.26417e-11	-0.996619	6.265e-06	-0.930007	0	-0.755251	0.003617
Cre14.g609488	Cre14.g609488.t1.1				14.721	14.6227	48.431	51.6652	12.5157	13.4821	41.171	41.0162	1.65788	4.92856e-19	1.71142	5.29401e-18	-0.30563	0.41743	-0.382508	0.039036
Cre14.g609550	Cre14.g609550.t1.1				4.32689	4.12754	9.67001	9.84231	6.86005	8.2649	3.44961	3.0648	1.13038	2.88497e-07	-0.835938	0.00155745	0.531241	0.050894	-1.49795	0
Cre14.g609600	Cre14.g609600.t1.2				1.69728	1.65354	7.60802	5.90722	2.33633	2.60993	0.492058	1.80845	1.31508	7.05836e-05	-0.577563	0.453085	0.194673	0.84848	-1.86457	1e-06
Cre14.g609850	Cre14.g609850.t1.1				6.27797	6.2771	1.06033	2.21784	5.26299	4.8586	5.02905	4.0327	-1.16352	0.000921572	0.0619768	1	-0.389204	0.326499	0.966283	0.027523
Cre14.g610250	Cre14.g610250.t1.1				0.564997	0.366956	3.45351	3.20244	2.49983	1.629	15.7246	15.4332	1.30153	0.00120255	2.4672	5.10133e-20	0.800184	0.121818	1.72919	0
Cre14.g610500	Cre14.g610500.t1.1				23.8001	19.189	7.07319	8.96074	14.3794	14.7653	9.85014	7.01148	-1.09489	5.21052e-06	-0.498388	0.0812966	-0.679362	0.000937	-0.04854	1
Cre14.g611700	Cre14.g611700.t1.2	PLAP8	plastid lipid associated protein	conserved expressed protein related to plastid lipid associated protein PAP/fibrillin; Arabidopsis homologue is in plastoglobuli PMID: 16461379	3.55479	3.2158	0.407409	0.795348	1.29196	1.53738	1.15939	0.774742	-1.56734	3.45017e-07	-0.22685	0.793455	-1.10571	0.000135	0.3764	0.630269
Cre14.g613150	Cre14.g613150.t1.2				2.24714	2.68677	6.18099	6.67319	5.33279	3.26894	9.23897	7.83598	1.14774	3.22941e-05	1.10161	4.80612e-05	0.422307	0.381289	0.256465	0.445678
Cre14.g613800	Cre14.g613800.t1.2				12.8126	13.4972	4.87089	5.1274	11.3379	10.1814	6.79477	6.90157	-1.06819	6.56668e-07	-0.366209	0.175743	-0.446946	0.035765	0.291535	0.437784
Cre14.g613950	Cre14.g613950.t1.1				21.1383	18.9642	241.097	237.91	17.2254	15.5065	36.8272	36.7388	3.65424	0	1.37992	1.34251e-43	-0.474084	0.000393	-2.80227	0
Cre14.g614050	Cre14.g614050.t1.2	MAP65	microtubule associated protein MAP65	similar to microtubule-associated protein MAP65, which binds tubulin dimers and promotes tubulin assembly/polymerization in Arabidopsis (PMID: 17394772)	16.8123	17.9753	44.3499	44.0552	9.58196	10.2903	8.79806	8.69455	1.43109	2.73783e-46	0.0578831	0.927265	-0.946614	0	-2.37388	0
Cre14.g614300	Cre14.g614300.t1.1				55.815	53.8585	18.6179	17.6022	52.6834	52.6918	18.8627	17.9803	-1.3896	5.02902e-34	-1.23245	1.57731e-27	-0.254316	0.017366	-0.090598	0.794948
Cre14.g614850	Cre14.g614850.t1.2	ANK17	Flagellar Associated Protein	Protein of unknown function with ankyrin repeats, flagella associated; found in the flagellar proteome as FAP33 [PMID: 15998802]	4.31237	4.34126	1.28501	1.2543	7.66385	8.42367	4.40693	4.88723	-1.34787	1.16263e-09	-0.519425	0.00170102	0.641352	0.000107	1.55079	0
Cre14.g615500	Cre14.g615500.t1.2				5.38332	3.97572	14.887	17.0956	2.45869	2.25308	0.755163	1.13541	1.68015	2.67305e-20	-0.757255	0.0910475	-0.910991	0.001544	-3.46956	0
Cre14.g615600	Cre14.g615600.t1.1				1.75185	1.70669	14.1724	15.7705	1.36783	1.60441	0.3585	1.07803	2.53457	4.53719e-31	-0.544795	0.455153	-0.261174	0.703623	-3.56237	0
Cre14.g616900	Cre14.g616900.t1.1	SULP2	chloroplast sulfate permease	transmembrane component of chloroplast sulfate-transporting ABC transporter [GI:42559329]; homologous to SulP1	22.7857	20.8393	6.53746	7.62975	21.9462	19.8428	9.97605	7.97259	-1.26652	9.23125e-10	-0.891087	2.53673e-05	-0.2439	0.295106	0.187118	0.710088
Cre14.g616950	Cre14.g616950.t1.1	SelT	Selenoprotein T	conserved in plants and animals; has Selenocysteine in position 61 (replaced by Cys in plants)	10.3407	8.31522	33.7105	38.3402	16.5581	19.8763	34.2614	34.7712	1.85119	2.9905e-27	1.10645	1.314e-12	0.663868	0.004517	-0.171842	0.377986
Cre14.g617100	Cre14.g617100.t1.1				73.7764	74.8084	170.258	179.215	58.8451	51.4417	106.942	99.9744	1.32953	5.1026e-46	1.12064	8.5234e-24	-0.606413	5e-06	-0.862008	0
Cre14.g617800	Cre14.g617800.t1.2				94.5112	94.7269	225.578	225.06	59.5467	69.846	156.901	152.656	1.37007	1.00455e-99	1.48642	1.35157e-88	-0.737882	0	-0.657062	0
Cre14.g618400	Cre14.g618400.t1.1				14.8872	17.0111	121.124	117.918	19.268	18.172	37.8752	33.7191	2.96764	0	1.14975	2.66169e-21	0.0289	1	-1.84301	0
Cre14.g619250	Cre14.g619250.t1.1				13.9178	16.3075	49.3186	53.0214	67.0714	69.6272	153.598	141.334	1.73002	1.99804e-29	1.32996	1.80892e-50	1.83688	0	1.37953	0
Cre14.g619850	Cre14.g619850.t1.2				2.90486	2.62035	10.7521	11.9395	5.61704	4.74601	15.2521	17.2576	1.72844	5.5994e-14	1.7121	5.97259e-19	0.533107	0.130782	0.372613	0.080773
Cre14.g622901	Cre14.g622901.t1.1				2.25999	2.29347	0.518027	0.421374	2.49983	2.68785	0.982784	0.985096	-1.12159	0.00398903	-0.798108	0.0644307	-0.011156	1	0.511666	0.469753
Cre14.g623650	Cre14.g623650.t1.1				5.42617	4.84579	192.784	193.169	5.60189	4.69343	18.3528	14.4539	4.88771	0	1.66659	8.19885e-10	-0.153087	0.826681	-3.57915	0
Cre14.g624900	Cre14.g624900.t1.1	FAP171	Flagellar Associated Protein	Flagellar Associated Protein, found in the flagellar proteome [PMID: 15998802]	3.92453	2.48519	0.539741	0.614651	2.25733	1.52756	2.04796	1.88171	-1.3045	0.00142124	0.228674	0.779091	-0.667566	0.141909	1.01387	0.029211
Cre14.g626750	Cre14.g626750.t1.1				285.072	290.209	590.583	592.917	238.353	229.218	730.975	700.233	1.17018	7.50275e-125	1.84823	3.37027e-284	-0.496604	0	0.153429	0.000362
Cre14.g627550	Cre14.g627550.t1.1				15.1901	16.067	6.20761	6.13696	12.52	12.1629	10.7955	11.1992	-1.0676	5.05992e-09	0.0736737	0.878935	-0.504519	0.003642	0.654184	0.002599
Cre14.g629061	Cre14.g629061.t1.1				26.7442	31.2167	269.73	286.768	32.5965	32.9532	31.1598	27.4939	3.24779	1.79769e-234	0.0764777	0.871073	-0.019803	1	-3.27034	0
Cre14.g629429	Cre14.g629429.t1.1				0.985519	0.872834	2.87506	2.56581	1.50633	1.16241	4.4415	3.90522	1.03647	0.00385185	1.44701	3.55385e-06	0.178461	0.86223	0.409227	0.303996
Cre14.g630700	Cre14.g630700.t1.1				5.28176	5.14562	1.27439	1.30613	2.45991	1.80337	0.483546	0.363512	-1.3966	1.85699e-07	-1.35338	0.000583496	-1.21156	2e-06	-1.06052	0.020077
Cre14.g631000	Cre14.g631000.t1.2				2.14618	1.34413	6.39523	5.28204	1.35654	1.25968	5.39977	5.01155	1.4476	2.24784e-08	1.78941	6.21476e-11	-0.388741	0.400934	-0.251012	0.458308
Cre15.g636800	Cre15.g636800.t1.2				93.653	89.7909	366.64	387.813	80.2427	77.1489	192.803	181.917	2.14549	9.36032e-189	1.47469	8.10823e-87	-0.412742	6.5e-05	-1.12245	0
Cre15.g639350	Cre15.g639350.t1.2				1.95779	1.35359	4.11121	4.26732	4.66644	5.54458	8.67849	8.45116	1.28364	3.60513e-10	0.954642	2.11306e-12	1.26628	0	0.871499	0
Cre15.g640250	Cre15.g640250.t1.1				8.24364	7.40651	17.7201	18.1984	14.1843	11.2502	47.6387	44.4769	1.20713	9.7706e-13	2.03471	8.04842e-72	0.440994	0.056524	1.2036	0
Cre15.g641450	Cre15.g641450.t1.2				4.29236	4.77911	1.26499	1.37196	3.25569	3.11604	1.13329	0.668207	-1.18141	5.24189e-05	-1.18447	0.00107681	-0.577344	0.049339	-0.467108	0.452115
Cre15.g641883	Cre15.g641883.t1.1				21.7303	19.3589	49.5432	49.1914	30.1292	29.5508	76.7095	75.3704	1.33488	3.09197e-29	1.55843	2.70645e-62	0.318836	0.057601	0.494944	0
Cre15.g646600	Cre15.g646600.t1.2				3.82428	3.58423	0.887687	0.823151	1.19943	0.879305	0.589431	0.717422	-1.46537	3.83203e-08	-0.288551	0.672067	-1.59232	0	-0.349383	0.603722
Cre16.g648300	Cre16.g648300.t1.1				0.266379	0.259513	1.87246	1.11252	0.628583	0.768025	1.08116	1.39333	1.1586	0.00427418	0.642031	0.230619	0.48015	0.472292	-0.245773	0.750294
Cre16.g648400	Cre16.g648400.t1.2				1.07158	1.3702	4.23701	4.37552	4.14855	4.40266	8.56256	7.06467	1.43475	1.7174e-07	1.0056	8.70854e-07	1.21358	3.6e-05	0.667729	0.002924
Cre16.g648450	Cre16.g648450.t1.2				0.51463	0.877389	3.83376	4.14515	1.19541	1.0572	3.18906	3.6452	1.82398	1.24639e-10	1.45021	9.42498e-07	0.307824	0.668376	-0.30153	0.406825
Cre16.g648700	Cre16.g648700.t1.2				14.0199	14.8637	101.323	97.1491	6.11191	6.2417	5.73812	7.09966	2.79466	7.00611e-182	0.257098	0.473662	-1.25896	0	-3.8953	0
Cre16.g649150	Cre16.g649150.t1.2				6.3347	7.33416	13.3839	14.2965	7.14915	8.57627	17.6462	19.8487	1.02489	6.92706e-08	1.4039	5.24568e-18	-0.002441	1	0.301366	0.105651
Cre16.g649250	Cre16.g649250.t1.2				5.84766	5.69693	32.3479	27.7371	5.00211	4.215	7.28973	5.77753	2.07975	1.93787e-24	0.578515	0.136085	-0.379102	0.398232	-2.0657	0
Cre16.g650432	Cre16.g650432.t1.1				33.3094	34.332	14.9013	11.0889	9.54037	10.0213	4.75836	4.34871	-1.13016	4.88563e-11	-0.714354	0.0230091	-1.79066	0	-1.37638	1e-05
Cre16.g652750	Cre16.g652750.t1.1				1.8779	1.65359	3.90713	3.45825	3.73895	3.49852	2.70116	2.20379	1.00652	8.49227e-06	-0.291411	0.339533	0.712664	0.003634	-0.644536	0.005806
Cre16.g656150	Cre16.g656150.t1.1				8.34844	9.28149	29.5371	26.8974	12.5154	12.2334	20.5867	22.2619	1.66582	3.77509e-29	0.98211	7.2949e-11	0.258412	0.336908	-0.499267	0.000246
Cre16.g656800	Cre16.g656800.t1.1				2.33039	2.68855	0.787191	0.603728	6.89198	6.6306	1.60011	1.97811	-1.11436	0.000829942	-1.4534	1.11834e-09	1.04373	8e-06	0.883346	0.032847
Cre16.g657650	Cre16.g657650.t1.1	FAP35	Flagellar Associated Protein	Flagellar Associated Protein, found in the flagellar proteome [PMID: 15998802]	465.382	471.478	209.287	200.451	325.611	320.251	184.612	193.514	-1.03954	2.10427e-63	-0.522194	4.45759e-14	-0.732924	0	-0.232822	0.00842
Cre16.g659350	Cre16.g659350.t1.1	CYB5_1	cytochrome b5 protein	_	137.133	121.342	305.68	318.193	117.564	121.662	166.975	166.052	1.38705	3.83944e-85	0.710825	3.00346e-17	-0.304637	0.010853	-1.01514	0
Cre16.g661750	Cre16.g661750.t1.1				112.531	128.084	295.228	296.15	69.5083	72.2789	56.2035	52.9361	1.37934	1.19467e-37	-0.123191	0.737807	-0.895985	0	-2.45374	0
Cre16.g661850	Cre16.g661850.t1.2				104.716	110.469	322.32	326.4	88.1621	86.4344	80.6654	69.9006	1.6908	1.17168e-101	0.0269408	0.973429	-0.485465	5.8e-05	-2.19016	0
Cre16.g662000	Cre16.g662000.t1.1				0.157815	0.614989	2.74921	2.68352	1.53616	1.36504	1.78432	1.78852	1.31951	0.00162791	0.327125	0.680102	0.726068	0.239031	-0.480438	0.403516
Cre16.g663950	Cre16.g663950.t1.1	_	SC5D, C-5 sterol desaturase	Delta-7-sterol-C5(6)-desaturase, Delta7-sterol-C5-desaturase (ERG3)	30.1206	30.0429	106.915	106.543	48.6113	48.8807	145.204	150.172	1.89307	3.82937e-84	1.81429	2.25823e-121	0.471056	0.00053	0.345	2e-06
Cre16.g664050	Cre16.g664050.t1.1				12.629	13.1441	61.7792	62.2685	10.4813	12.0092	28.585	29.5412	2.30572	1.13252e-117	1.55436	3.75257e-36	-0.372614	0.053731	-1.19376	0
Cre16.g672552	Cre16.g672552.t1.1				27.6586	28.9794	9.80879	9.92469	50.682	53.9411	13.9567	14.8994	-1.24298	2.1576e-13	-1.54454	3.89405e-32	0.653879	0	0.391247	0.119864
Cre16.g675100	Cre16.g675100.t1.2				0.490681	0.478034	1.74957	1.4638	3.13592	3.06526	3.93566	3.65974	1.11178	0.00186668	0.472214	0.0990024	1.68245	0	0.951385	0.000904
Cre16.g676200	Cre16.g676200.t1.2				8.88138	11.6	31.051	33.5408	10.4501	9.45484	29.794	26.716	1.67356	5.73545e-33	1.6592	5.25765e-32	-0.209788	0.481747	-0.30514	0.022007
Cre16.g676650	Cre16.g676650.t1.1	AP1G1	Gamma-Adaptin	Expressed Protein. Gamma-Adaptin. Clathrin Adaptor Complex Large Subunit, putative member of AP-1 complex	22.0019	23.321	42.0401	42.6895	23.4412	23.3698	55.7228	57.3116	1.00128	1.71159e-20	1.48279	1.21041e-56	-0.148917	0.421297	0.291196	0.002383
Cre16.g677000	Cre16.g677000.t1.1	HSP70E	Heat shock protein 70E	HSP70E is one of 9 genes encoding HSP70-like proteins in Chlamydomonas; it is more similar to HSP110-like proteins, as is HSP70G; HSP70E is inducible by MgProto and light; PMID: 16143837, 16143841	122.616	124.154	254.65	257.117	99.8103	96.8662	244.276	241.191	1.18309	4.58599e-148	1.54014	1.71946e-244	-0.525251	0	-0.195418	2e-06
Cre16.g677750	Cre16.g677750.t1.1				12.3895	12.2857	49.6981	51.8766	39.3512	38.2732	71.0028	67.8911	2.04285	4.20688e-60	1.06316	1.75584e-32	1.36191	0	0.326141	0.000684
Cre16.g678850	Cre16.g678850.t1.2				7.67525	9.18113	2.13788	2.86934	4.29863	2.77317	0.337993	0.338788	-1.26501	5.82658e-07	-1.90663	3.54106e-05	-1.21902	0	-1.76173	1e-05
Cre16.g681800	Cre16.g681800.t1.2				5.41196	5.38465	13.936	15.7671	5.40042	6.67312	9.01326	10.4398	1.35581	4.46393e-11	0.827936	0.000648253	-0.039426	1	-0.675717	0.000959
Cre16.g682100	Cre16.g682100.t1.1				42.7975	44.147	17.8062	18.9901	41.6905	40.7512	27.8384	31.6662	-1.00984	1.96903e-10	-0.218108	0.2698	-0.265789	0.106468	0.535786	0.005108
Cre16.g683250	Cre16.g683250.t1.1				24.7238	28.7653	58.2205	56.6701	35.8865	34.3086	106.896	115.986	1.16912	2.27871e-18	1.8599	2.49823e-75	0.179532	0.44729	0.818842	0
Cre16.g683350	Cre16.g683350.t1.1				2.10133	2.04717	5.6729	4.80599	6.61145	6.56346	3.65517	2.74782	1.02902	0.00105298	-0.666153	0.0460591	1.08567	0.000389	-0.681465	0.050016
Cre16.g683400	Cre16.g683400.t1.1				4.85267	4.30736	27.3877	28.3739	8.58827	7.36873	7.31552	6.95669	2.40261	1.52519e-45	0.0777685	0.926636	0.493467	0.095623	-1.94919	0
Cre16.g684022	Cre16.g684022.t1.1				5.38755	5.04419	1.02642	1.31499	1.54787	1.69456	0.425972	0.609963	-1.48639	3.82596e-08	-0.910899	0.0446811	-1.47819	0	-0.806206	0.10165
Cre16.g684550	Cre16.g684550.t1.2				3.48615	3.39629	9.58901	10.6079	6.16979	4.52308	6.67039	10.0291	1.02268	0.004949	0.624659	0.150234	0.239467	0.763004	-0.320785	0.583694
Cre16.g684800	Cre16.g684800.t1.2	_	ubiquitin family protein	putative ubiquitin family protein with leucine-rich repeats	8.99511	9.80297	28.0968	24.833	7.55504	7.12107	24.7958	22.5947	1.43488	3.49832e-15	1.74943	4.51212e-20	-0.4615	0.126889	-0.264294	0.191724
Cre16.g685628	Cre16.g685628.t1.1				4.21531	2.26947	13.8322	13.5017	6.57681	5.18128	23.5406	21.6619	1.83651	1.11036e-16	2.01239	5.21676e-31	0.541501	0.260357	0.573247	0.000766
Cre16.g685700	Cre16.g685700.t1.1	CMA4	transmembrane protein of CMA family	Chlamydomonas-specific membrane protein family A; transmembrane protein with proline-rich C-terminal domain; secretory pathway	76.3415	67.2268	135.156	153.674	157.628	158.637	304.067	322.569	1.11109	3.00074e-14	1.21908	3.06903e-82	0.913768	0	0.990183	0
Cre16.g686050	Cre16.g686050.t1.2				4.79551	4.57355	13.3757	12.4688	2.54613	2.13946	9.044	8.58121	1.46502	1.13973e-21	1.95758	4.15988e-26	-1.02137	1e-05	-0.644988	7e-06
Cre16.g688550	Cre16.g688550.t1.1	GSTS1	glutathione-S-transferase	putative glutathione-S-transferases (Sigma class), Gene expression is induced by various oxidative stress conditions [PMID: 17435007; PLANT SCIENCE 168: 747-759]	24.1142	24.2118	84.3771	90.0684	111.701	103.012	518.54	499.381	1.84306	5.81812e-41	2.46444	0	1.83063	0	2.39774	0
Cre16.g689600	Cre16.g689600.t1.1	FAP73	Flagellar Associated Protein	Conserved uncharacterized Flagellar Associated Protein; found in the flagellar proteome [PMID: 15998802]	8.61656	8.05183	2.25721	2.83278	8.86966	9.27822	6.11758	6.13198	-1.08047	0.000731368	-0.268847	0.550542	-0.065067	0.978108	0.860143	0.027838
Cre16.g691500	Cre16.g691500.t1.1	_	Sec14p-like lipid-binding protein	_	52.1746	52.5746	119.1	124.482	27.4692	26.9535	44.1316	42.8823	1.3271	6.0202e-66	0.89355	1.16516e-14	-1.10321	0	-1.58082	0
Cre16.g691550	Cre16.g691550.t1.1	_	hypothetical protein	_	2.09082	2.7159	14.697	17.0487	13.3623	11.2528	44.8548	41.7199	1.95931	9.11453e-13	1.88586	3.83068e-26	1.48207	3e-06	1.23394	0
Cre16.g692450	Cre16.g692450.t1.1				16.0033	14.6076	36.8805	33.1606	17.9887	18.7057	48.2757	50.2746	1.22351	1.44091e-15	1.59821	3.88798e-35	0.053789	0.954058	0.363375	0.00678
Cre16.g692800	Cre16.g692800.t1.2				2.87856	3.13429	9.31504	8.33475	12.4365	10.1059	48.4513	52.108	1.20358	4.5387e-05	2.25229	6.23454e-51	1.27942	9e-06	2.22405	0
Cre16.g694200	Cre16.g694200.t1.2				0.564997	0.458695	3.62619	3.79236	2.33318	1.9548	7.94417	6.73149	1.73154	7.89536e-08	1.67435	6.45978e-11	1.02638	0.012649	0.747545	0.00623
Cre16.g694250	Cre16.g694250.t1.1				18.1871	18.3129	37.4911	39.8725	16.8499	12.775	41.5084	46.6073	1.14637	1.19466e-17	1.74836	4.26268e-26	-0.473523	0.016488	0.064471	0.79309
Cre17.g697300	Cre17.g697300.t1.2	_	predicted protein	putative protein of unknown function, not conserved	0.568456	0.479963	3.02295	2.64547	0.938984	0.983386	4.21889	4.22881	1.84642	2.59059e-12	2.03546	3.98333e-19	0.438463	0.365803	0.419496	0.090835
Cre17.g697800	Cre17.g697800.t1.1				2.05847	2.6387	5.46336	6.69026	1.82154	2.43647	9.32842	10.1059	1.11083	0.000116541	2.01979	6.65106e-16	-0.231649	0.724024	0.50296	0.065551
Cre17.g700950	Cre17.g700950.t1.1	FDX5	Apoferredoxin	Fe2S2 containing redox protein, predicted chloroplast localization	0.230582	0.673917	6.13099	7.42901	2.44851	0.598335	25.8701	21.7096	1.89732	8.80474e-08	3.23648	6.92274e-33	0.495761	0.609166	1.46379	0
Cre17.g703750	Cre17.g703750.t1.1				7.68436	8.31493	16.8609	17.5342	7.34492	8.52399	23.264	23.1908	1.20032	3.90698e-33	1.76178	9.15022e-90	-0.208147	0.211257	0.309967	0.000252
Cre17.g709450	Cre17.g709450.t1.1				3.48692	3.19722	10.3434	8.62767	7.26018	7.62884	12.309	12.6956	1.1375	0.000220279	0.8412	0.00285475	0.664571	0.079467	0.245327	0.569488
Cre17.g715150	Cre17.g715150.t1.1				5.81281	3.82634	47.8221	41.3366	2.91943	2.44598	2.18618	3.01307	2.88693	3.9667e-43	0.131221	0.924456	-0.704094	0.053812	-3.67602	0
Cre17.g715200	Cre17.g715200.t1.2				6.07202	4.99903	1.25459	1.91345	4.91907	5.10413	1.4876	1.4911	-1.23069	1.64877e-05	-1.19573	0.000107433	-0.286528	0.392133	-0.130755	0.919277
Cre17.g717400	Cre17.g717400.t1.2				3.23888	3.7291	0.359954	0	2.43183	1.86767	1.28042	1.369	-2.17936	1.10591e-08	-0.308993	0.632214	-0.65313	0.067718	1.58671	0.009877
Cre17.g720300	Cre17.g720300.t1.1				0.889027	1.3533	3.71899	2.68529	2.65512	2.01856	2.60958	2.61572	1.20943	0.000476732	0.350872	0.377433	0.631448	0.087851	-0.342123	0.319586
Cre17.g720400	Cre17.g720400.t1.2				15.1558	17.425	3.21853	2.84241	9.76269	9.30174	1.64767	1.79727	-2.04455	5.41132e-33	-1.97406	1.07584e-21	-0.9213	0	-0.77868	0.011813
Cre17.g720950	Cre17.g720950.t1.1				26.2121	22.306	50.2378	45.363	17.1868	16.6629	11.3987	12.1138	1.05017	1.26501e-14	-0.256114	0.39043	-0.655529	0.000367	-2.01747	0
Cre17.g721000	Cre17.g721000.t1.1				2.77733	2.87486	20.4777	21.1276	2.25286	2.85272	9.15884	9.0795	2.70068	9.32181e-71	1.88142	1.85872e-22	-0.287134	0.476591	-1.26194	0
Cre17.g721700	Cre17.g721700.t1.1	CPLD44	thylakoid lumenal protein	conserved expressed protein similar to thylakoid lumenal protein, with pentapeptide repeat	37.9301	44.9115	17.2993	16.7118	37.0069	35.8366	15.7331	19.6703	-1.03264	7.42451e-10	-0.752306	2.89627e-05	-0.361535	0.026458	-0.063932	0.975599
Cre17.g722150	Cre17.g722150.t1.1	PKS3	type III polyketide synthase	Variant PKS3a, generated by alternative transcription start; N-terminus longer than PKS3b; Similar to chalcone and stilbene synthases; plant-specific polyketide synthases (PKS) and related enzymes, also called type III PKSs. PKS generate an array of different products, dependent on the nature of the starter molecule. They share a common chemical strategy, after the starter molecule is loaded onto…	57.1946	61.1201	197.325	198.731	80.4566	82.0099	284.103	284.36	1.85221	2.22379e-177	2.03633	0	0.249634	0.012043	0.399692	0
Cre17.g722200	Cre17.g722200.t1.1	MRPL11	mitochondrial ribosomal protein L11	Putative mitochondrial ribosomal protein L11, imported to mitochondria	9.02865	7.4859	19.5504	19.0832	16.8289	14.1235	34.4171	34.833	1.13644	6.16939e-07	1.31237	1.4691e-14	0.586554	0.033855	0.67843	0.000173
Cre17.g723600	Cre17.g723600.t1.1	IFT81	Intraflagellar Transport Protein 81	AY615519, PMID: 15955805	16.9232	18.6916	6.49519	7.39665	18.458	22.4675	13.007	14.2385	-1.08451	2.88457e-09	-0.319844	0.133848	-0.007092	1	0.784865	0.000148
Cre17.g723750	Cre17.g723750.t1.2				63.452	57.416	123.848	122.236	113.63	104.372	211.39	198.761	1.12572	3.55817e-29	1.14206	1.64006e-54	0.627082	0	0.609114	0
Cre17.g725150	Cre17.g725150.t1.1	_	MDR-like ABC transporter	Multidrug resistance protein (P-glycoprotein)	6.01816	5.62535	16.8518	16.7403	11.5865	12.5213	43.3586	41.05	1.49267	1.28212e-18	1.98394	1.36143e-71	0.756897	0.000184	1.17651	0
Cre17.g725200	Cre17.g725200.t1.1	_	MDR-like ABC transporter	Multidrug resistance protein (P-glycoprotein)	71.6405	68.6633	127.984	130.969	31.3706	30.0249	43.129	42.0347	1.00751	4.69193e-50	0.698701	1.17497e-10	-1.35538	0	-1.70175	0
Cre17.g729450	Cre17.g729450.t1.1				62.0906	61.0083	141.591	143.978	26.1778	23.9779	33.7656	34.7143	1.33937	4.60311e-137	0.681321	1.01684e-12	-1.46712	0	-2.16021	0
Cre17.g729950	Cre17.g729950.t1.1				47.2107	50.5933	335.073	306.709	55.2593	52.1581	194.85	194.935	2.7739	2.6468e-112	2.06244	2.04777e-129	-0.06435	0.836481	-0.831515	0
Cre17.g730300	Cre17.g730300.t1.1				6.9692	6.13252	1.75205	1.30779	5.57024	6.41701	3.61722	3.03778	-1.36943	3.10174e-06	-0.500362	0.161099	-0.274719	0.453076	0.732194	0.085532
Cre17.g730650	Cre17.g730650.t1.1				17.4895	16.9904	38.2491	37.8672	13.5474	12.5136	42.6168	40.5574	1.24642	1.83986e-45	1.88101	4.59362e-105	-0.583707	2e-06	0.007519	1
Cre17.g731350	Cre17.g731350.t1.2	_	short chain dehydrogenase/reductase	member of short chain dehydrogenase / reductase family	13.6075	12.6179	32.0174	38.2951	34.9632	33.1828	113.072	101.189	1.40374	5.43583e-13	1.8475	1.03984e-44	1.07144	0	1.45537	0
Cre17.g731800	Cre17.g731800.t1.1				23.5496	23.6827	54.7922	52.0099	31.3706	34.9348	88.6438	82.0091	1.25082	3.40795e-26	1.57415	3.56491e-61	0.269006	0.112441	0.546538	0
Cre17.g735400	Cre17.g735400.t1.1	VPS2B	subunit of the ESCRT-III complex	Expressed Protein. Similar to yeast Vps2p/Did4p, SNF7-domain protein, component of the ESCRT-III complex involved in the ubiquitin-mediated internalization into the multi-vesicular bodies (late endosomes)	30.2418	27.6902	60.0421	56.9794	34.6083	32.4517	87.0145	90.1926	1.06986	3.87202e-13	1.58506	3.4705e-39	0.007769	1	0.466068	0.000126
Cre17.g735450	Cre17.g735450.t1.2				0.486037	0.947019	2.30918	1.9772	1.32938	1.52874	3.99661	3.62082	1.22717	7.94103e-05	1.4243	3.7759e-09	0.57729	0.19177	0.629932	0.017914
Cre17.g735500	Cre17.g735500.t1.1				6.17227	5.44784	13.8819	12.7475	7.84265	7.20963	14.4528	15.9585	1.2308	3.27743e-16	1.20437	2.56816e-19	0.156291	0.596891	0.068998	0.806862
Cre17.g735700	Cre17.g735700.t1.1				4.13576	4.83499	11.9446	9.4384	8.60038	7.69114	15.467	12.619	1.01025	0.000721472	0.879782	0.00091417	0.480918	0.228871	0.241546	0.542605
Cre17.g737050	Cre17.g737050.t1.1	_	RabGAP/TBC protein	Expressed Protein with RabGAP/TBC domain	18.9045	20.993	80.2404	74.182	35.2119	33.9611	140.847	137.144	1.98991	5.28092e-72	2.20985	3.11111e-164	0.55734	0.00033	0.72101	0
Cre17.g738600	Cre17.g738600.t1.2	RLS5	hypothetical protein	Member of a family of proteins [PMID: 16720695, 16622701] related to Volvox carteri RegA, which is a putative transcription repressor [PMID: 9895312] containing a SAND domain (IPR000770 SAND; PF01342).	3.22202	2.98202	0.960103	0.937161	3.45704	3.97137	0.945766	0.45644	-1.20319	5.34498e-06	-1.82269	1.77313e-11	0.047761	0.979009	-0.453204	0.452115
Cre17.g738750	Cre17.g738750.t1.1				12.8382	20.7711	3.78352	2.46207	10.5491	8.13013	5.18409	3.39757	-1.62083	0.00200609	-0.68856	0.074406	-0.841895	0.094481	0.231777	0.79309
Cre17.g741300	Cre17.g741300.t1.2				3.22261	3.3765	27.3729	26.7732	0.161417	0.0525932	0.264414	0.318043	2.87895	1.22362e-92	0.65907	0.400689	-2.76558	0	-5.32645	0
Cre18.g743550	Cre18.g743550.t1.2				6.28589	7.27209	29.2969	35.0429	14.6013	13.9325	64.1233	60.9634	2.10665	2.00369e-21	2.27838	1.5434e-80	0.753219	0.001428	0.822996	0
Cre18.g743600	Cre18.g743600.t1.1				13.4238	11.8733	31.9032	34.6185	18.5996	16.9583	54.3809	59.8982	1.36784	4.64352e-15	1.8325	4.42456e-41	0.253267	0.404408	0.637551	2e-06
Cre18.g743850	Cre18.g743850.t1.2				3.59798	4.96576	13.6078	14.7585	8.35761	8.55832	64.5408	67.0451	1.49413	3.48271e-10	3.0051	1.67154e-106	0.618791	0.060855	2.00271	0
Cre18.g744100	Cre18.g744100.t1.1	SEC1	SM/Sec1-family protein	Expressed Protein. SM (Sec1 family) protein, binds SNAREs at the plasma membrane; Model is extremely speculative in the middle exons!	15.2903	13.5105	33.9068	32.8844	23.075	24.6056	61.028	64.5815	1.25701	2.00592e-18	1.59623	8.24679e-53	0.487384	0.006477	0.773139	0
Cre18.g744750	Cre18.g744750.t1.2				4.89409	8.30984	23.0772	25.2789	20.7877	21.6498	49.0107	41.9338	1.76795	2.43245e-20	1.28692	8.05222e-15	1.32724	0	0.760243	1e-06
Cre18.g747250	Cre18.g747250.t1.2				4.69509	2.80045	9.31237	7.8893	3.05242	3.72956	7.91687	7.51784	1.11528	2.21731e-05	1.2355	5.84868e-07	-0.241625	0.698224	-0.247484	0.422632
Cre18.g748050	Cre18.g748050.t1.2				3.35376	3.17901	7.81205	8.1121	2.80733	2.50887	6.93738	5.45233	1.15218	1.70167e-06	1.22339	3.26862e-06	-0.375337	0.363036	-0.442695	0.102336
Cre18.g748450	Cre18.g748450.t1.1				3.13675	2.44472	9.49075	10.3869	6.10657	4.88371	41.4673	40.471	1.19188	0.000601439	2.63654	3.13566e-31	0.443309	0.41743	1.69464	0
Cre18.g748625	Cre18.g748625.t1.1				15.3223	13.6703	4.43638	4.04167	10.5615	9.2075	4.20828	3.65575	-1.28471	2.47488e-07	-0.891545	0.00361364	-0.651715	0.006548	-0.176227	0.849872
Cre18.g750250	Cre18.g750250.t1.2				1.45866	1.0658	0.306487	0.380754	0.860513	0.841124	0.396448	0.344397	-1.12318	0.000668551	-0.677369	0.128215	-0.571961	0.090635	-0.005179	1
Cre18.g751100	Cre18.g751100.t1.1				22.4613	24.9596	3.96864	4.0832	17.288	16.1901	4.57855	2.85558	-2.0608	1.2236e-27	-1.72466	4.68159e-15	-0.656404	4.1e-05	-0.215215	0.782535
Cre19.g754000	Cre19.g754000.t1.2				5.66625	6.21023	11.6892	12.8044	5.22299	5.43204	17.084	15.3542	1.09653	8.70693e-14	1.76435	4.70929e-41	-0.325353	0.151756	0.276692	0.047398
Cre19.g754150	Cre19.g754150.t1.1				0.922329	0.673917	4.22827	4.95268	2.24447	1.99445	5.41467	5.02538	1.26426	0.00120661	1.02393	0.0130994	0.516806	0.412473	0.050277	1
Cre19.g756000	Cre19.g756000.t1.2				1.2236	0.851471	4.24711	3.51987	3.17095	3.0995	4.02874	5.40968	1.35435	1.31849e-05	0.688937	0.0211292	0.937771	0.010173	0.131147	0.840949
Cre19.g756100	Cre19.g756100.t1.1				36.7466	33.426	278.469	284.534	30.7206	28.4479	140.198	135.572	3.03914	7.80702e-285	2.39001	5.92019e-120	-0.416374	0.02221	-1.13907	0
Cre19.g756650	Cre19.g756650.t1.1				14.053	12.8734	4.61543	4.31743	11.3219	11.4296	3.10117	4.38843	-1.08111	0.000148023	-1.0859	0.000782604	-0.371665	0.23848	-0.281361	0.704232
Cre20.g758300	Cre20.g758300.t1.2				9.56039	8.68465	1.65836	2.89059	4.91595	6.81665	1.91018	2.13993	-1.39362	5.7645e-07	-0.978065	0.00407843	-0.707546	0.009043	-0.171886	0.843779
Cre22.g764850	Cre22.g764850.t1.2				5.91136	5.29828	14.7422	16.7177	9.62498	9.20359	12.1334	11.5435	1.22972	4.69315e-06	0.484302	0.15189	0.403379	0.33097	-0.461319	0.127123
Cre22.g765150	Cre22.g765150.t1.1	_	hypothetical protein	_	7.43545	8.07963	42.4772	41.7181	6.4531	4.82354	5.84499	8.10252	2.30488	5.74517e-48	0.459068	0.246858	-0.540618	0.086016	-2.5271	0
Cre24.g769550	Cre24.g769550.t1.1				46.5059	47.9442	12.8596	16.296	16.3306	14.0471	5.99221	6.86435	-1.38048	3.60314e-14	-0.822624	0.00736759	-1.65084	0	-1.07126	0.000226
Cre24.g770350	Cre24.g770350.t1.1				21.3764	21.2476	8.54161	8.85455	6.64616	5.80929	4.45948	3.90335	-1.07165	1.29353e-13	-0.293639	0.365194	-1.83114	0	-1.06889	0
Cre27.g775000	Cre27.g775000.t1.1				12.4837	11.2118	54.7259	56.5604	29.3432	31.2129	61.9213	57.1356	2.13033	8.41426e-42	1.17028	2.13266e-19	1.0226	0	-0.022805	1
Cre27.g775300	Cre27.g775300.t1.2				1.53078	1.49133	5.88401	5.32187	0.989892	1.37499	5.42785	4.10613	1.59717	1.72109e-11	1.85429	1.40569e-08	-0.390683	0.418209	-0.331823	0.243972
Cre27.g775900	Cre27.g775900.t1.2				3.28538	3.06154	8.12001	8.56517	4.42406	4.20082	1.98774	1.74337	1.13581	6.102e-05	-0.695555	0.105469	0.169888	0.822869	-1.76615	0
Cre27.g775950	Cre27.g775950.t1.2				3.68932	2.5673	324.973	342.914	0.466383	0.683811	2.06273	1.60812	5.83496	0	0.810269	0.186752	-1.08856	0.013692	-6.55599	0
Cre28.g776450	Cre28.g776450.t1.1	TRP7	Transient receptor potential ion channel	Similar to transient receptor potential ion channel	0.813859	1.05718	14.6753	16.3883	2.16055	2.28786	0.825807	0.945999	3.31278	1.7067e-62	-0.788826	0.0516077	0.709177	0.070993	-3.59744	0
Cre28.g776650	Cre28.g776650.t1.1				1.24692	1.49512	6.06809	6.26645	1.18828	1.32744	1.66843	1.33789	1.63837	2.79881e-09	0.329013	0.625226	-0.191713	0.83251	-1.71839	0
Cre28.g777050	Cre28.g777050.t1.2				14.0402	15.3012	36.0008	37.8027	25.0589	23.2593	75.5434	69.29	1.36899	5.58752e-23	1.77972	2.06341e-66	0.479265	0.007499	0.834697	0
Cre29.g778150	Cre29.g778150.t1.1				4.78643	5.44023	12.1903	12.494	6.35327	7.24514	18.0391	17.2702	1.15389	9.95075e-07	1.46366	2.3131e-13	0.165424	0.768529	0.367931	0.109802
Cre29.g778950	Cre29.g778950.t1.1				93.2768	92.4745	37.2112	36.7486	28.4274	29.1474	23.1105	22.2715	-1.18171	6.69582e-181	-0.0976352	0.248936	-1.88134	0	-0.818711	0
Cre31.g779650	Cre31.g779650.t1.2	_	Chlamydomonas specific family protein	except for central domain (between AA 162 and 592), is almost identical to estExt_fgenesh2_pg.C_1490004, and closely related to estExt_fgenesh2_kg.C_10002	36.4778	32.732	12.1753	11.0252	17.8385	19.5124	11.1318	10.7396	-1.2898	3.73423e-14	-0.478964	0.0443342	-1.01245	0	-0.181948	0.662044
Cre31.g779700	Cre31.g779700.t1.2				7.91372	7.80493	2.0603	2.18594	5.9654	5.23944	1.35956	2.38483	-1.33518	2.9765e-07	-1.09807	0.000624482	-0.591151	0.020786	-0.249756	0.787339
Cre31.g780300	Cre31.g780300.t1.2				6.43256	6.39732	2.58029	2.03889	9.07191	8.57772	2.15624	3.09593	-1.08855	7.59871e-06	-1.35413	7.51348e-10	0.231386	0.387212	0.044378	1
Cre32.g782010	Cre32.g782010.t1.1				182.43	186.932	79.0332	80.9027	112.817	115.521	66.8538	69.6549	-1.05287	1.30152e-62	-0.491454	4.19752e-11	-0.887867	0	-0.343817	7e-05
Cre44.g788100	Cre44.g788100.t1.2				6.99319	7.47226	14.4783	13.8295	16.7682	18.7807	36.9344	38.1521	1.02655	5.30279e-12	1.2992	2.13237e-47	1.02784	0	1.25972	0
Cre44.g788200	Cre44.g788200.t1.1				40.6902	39.5538	77.3327	76.9318	34.576	37.5263	87.8873	89.9733	1.05751	1.46786e-38	1.52566	1.07357e-89	-0.348209	0.001817	0.084528	0.395874
Cre45.g788400	Cre45.g788400.t1.1				1.82994	1.14607	0.059922	0.23396	1.21449	1.01753	0	0.170924	-1.46493	0.00044829	-1.83017	0.000698436	-0.39024	0.400934	-0.441545	0.930201
Cre56.g791150	Cre56.g791150.t1.1	_	predicted protein	putative protein of unknown function	135.577	136.049	35.674	35.9013	101.823	88.7017	61.6462	63.8947	-1.7275	3.88616e-80	-0.347514	0.00915797	-0.70623	0	0.671627	0
Cre62.g792600	Cre62.g792600.t1.2				1.63677	1.65153	0.375176	0.313895	2.74158	2.78093	0.559249	0.254802	-1.172	0.00159871	-1.79911	2.64621e-07	0.41748	0.273995	0.028658	1
Cre66.g793601	Cre66.g793601.t1.1				1.15419	0.374812	7.76039	6.88632	0	0.332776	0.334608	0	1.47243	0.000201829	0.0267167	1	-0.536596	0.663877	-2.3469	1e-06
Cre68.g793901	Cre68.g793901.t1.1				2.50286	2.15564	0.698416	0.811579	1.8938	2.47863	1.13572	1.01191	-1.10288	0.000108687	-0.643117	0.0407025	-0.254113	0.492318	0.297212	0.616284
Cre69.g794000	Cre69.g794000.t1.2				3.43066	2.95659	6.47239	6.96722	3.79474	4.16576	9.00859	9.37486	1.01834	6.70058e-06	1.32349	6.75701e-12	0.095932	0.90742	0.310285	0.186436
Cre69.g794101	Cre69.g794101.t1.1				3.18436	3.44699	8.92112	9.10376	3.36576	4.36106	22.0023	21.3601	1.29881	1.14452e-08	2.50606	1.79969e-49	0.006757	1	1.08581	0
Cre73.g794850	Cre73.g794850.t1.1				22.4632	23.4758	6.36596	5.11728	7.95107	8.83173	2.4865	2.1363	-1.30032	1.19711e-05	-0.982606	0.0336981	-1.24666	1.1e-05	-0.82556	0.109818
Cre73.g795000	Cre73.g795000.t1.1				2.82899	2.44984	5.35231	7.03286	9.4572	8.6615	13.0443	14.2102	1.17808	5.25701e-05	0.804418	1.84661e-10	1.41501	0	0.986468	0
Cre75.g795400	Cre75.g795400.t1.2				14.3429	14.1757	3.81175	4.4648	10.8526	11.6869	7.23153	6.16126	-1.22627	9.60667e-06	-0.424149	0.254479	-0.455971	0.116191	0.439739	0.349802
Cre82.g796100	Cre82.g796100.t1.1				50.3925	56.1071	109.162	99.6148	58.3131	68.9739	198.91	181.999	1.00544	3.89702e-09	1.74628	2.82183e-40	0.046038	0.972693	0.72261	0
Cre83.g796250	Cre83.g796250.t1.1				15.0719	19.3911	57.8076	48.9096	40.317	38.7119	95.7618	96.4886	1.67986	2.25848e-15	1.50121	2.33787e-74	0.951239	0	0.723848	0

## Sheet: C2(sak1MvsR)
gene name	full gene name	Genename	Defline	Description	WT-mock 1	WT-mock 2	WT-RB 1	WT-RB 2	sak1-mock 1	sak1-mock 2	sak1-RB 1	sak1-RB 2	C1 folds	C1 fdr	C2 folds	C2 fdr	C3 folds	C3 fdr	C4 folds	C4 fdr
Cre01.g000250	Cre01.g000250.t1.1				11.9163	14.6727	21.6996	22.2179	18.0139	17.4649	41.0238	40.8317	0.767153	0.000178822	1.37344	1.04964e-20	0.194445	0.564691	0.74257	1e-06
Cre01.g000300	Cre01.g000300.t1.2				17.4809	14.6849	112.386	108.951	16.4878	17.5649	92.4962	94.9039	2.81113	4.54013e-200	2.63464	1.61792e-177	-0.108113	0.719954	-0.356728	0
Cre01.g001400	Cre01.g001400.t1.1	ZMP1	zinc-metallopeptidase-like protein	partial sequence similar to leishmanolysin-like peptidase (peptidase M8 family); neutral zinc metallopeptidases; zinc-binding site	0.396785	0.22089	4.57348	4.00763	1.3543	1.81408	13.6066	13.8857	2.50534	1.62411e-19	3.00569	4.91313e-62	1.23763	0.001303	1.46586	0
Cre01.g001950	Cre01.g001950.t1.1				6.59473	6.09807	7.99367	10.3035	4.54985	4.93074	13.3183	10.9135	0.54978	0.0396002	1.40807	8.64306e-11	-0.50575	0.102703	0.26523	0.436269
Cre01.g002000	Cre01.g002000.t1.2	_	predicted proteim	C2-domain containing protein; C2 domain is a Ca2+-binding motif present in phospholipases, protein kinases C, and synaptotagmins (amongst others)	84.2151	77.5066	165.703	166.912	55.232	53.0206	128.339	144.071	1.15369	3.43359e-46	1.54247	3.42551e-31	-0.754434	0	-0.405898	0
Cre01.g002050	Cre01.g002050.t1.2				9.63488	10.4859	30.2422	32.5492	13.5186	12.0878	75.1153	72.3409	1.66123	1.30935e-35	2.69372	1.20028e-173	0.131408	0.679731	1.09463	0
Cre01.g003050	Cre01.g003050.t1.1	SEC8	Component of the Exocyst Complex	Hypothetical Conserved Protein. Similar to SEC8, a subunit of the Exocyst.	3.68779	2.69455	23.5628	24.8047	1.78463	1.99362	21.5495	21.349	2.78376	5.18293e-84	3.4206	2.12812e-106	-0.746281	0.010653	-0.286206	0.014059
Cre01.g003200	Cre01.g003200.t1.1				4.11698	3.66708	2.48054	2.00017	7.18215	6.20638	1.43226	0.820359	-0.448814	0.363594	-1.74737	6.24702e-08	0.458004	0.178832	-0.747042	0.130411
Cre01.g003350	Cre01.g003350.t1.2				4.67969	4.75729	2.42515	3.27767	6.66171	7.21557	1.41567	2.30587	-0.36864	0.590292	-1.17104	0.00253969	0.254934	0.629913	-0.467093	0.467686
Cre01.g003850	Cre01.g003850.t1.2				28.0547	30.4102	13.0732	13.3127	32.3961	34.7995	12.2	10.8177	-0.952942	5.17269e-14	-1.25652	3.49576e-25	-0.002111	1	-0.302938	0.126964
Cre01.g003950	Cre01.g003950.t1.2				15.8021	15.5433	5.35745	3.95618	14.5678	15.8217	2.20956	2.83489	-1.49528	7.35256e-24	-2.18181	2.27593e-40	-0.23915	0.106126	-0.886758	0.007738
Cre01.g004124	Cre01.g004124.t1.2				7.35571	8.06188	3.76882	4.59846	3.92459	3.64903	1.36416	1.08447	-0.659784	0.00170467	-1.14672	6.64277e-05	-1.09355	0	-1.57643	0
Cre01.g004350	Cre01.g004350.t1.1				19.6252	20.6402	55.2078	51.8262	15.1297	16.7178	51.7874	51.2612	1.49887	2.7689e-57	1.89312	5.04156e-88	-0.515984	0.000242	-0.171815	0.065188
Cre01.g004600	Cre01.g004600.t1.2	RWP12	RWP-RK transcription factor	putative RWP-RK domain transcription factor [PMID: 15785851]; model is very tentative	0.742321	0.361594	1.52003	1.37298	1.53272	1.79782	3.42176	4.12009	1.17283	6.0523e-05	1.3054	4.32582e-10	1.11837	0.00038	1.15194	0
Cre01.g004800	Cre01.g004800.t1.1	_	expressed hypothetical protein	similarity to RWP-RK transcription factor	49.5842	46.9231	18.5009	17.8773	25.752	27.0136	8.378	9.10488	-1.20697	3.07697e-25	-1.27163	4.14659e-16	-1.03637	0	-1.10037	0
Cre01.g004900	Cre01.g004900.t1.1				20.1426	21.1185	58.5703	64.038	79.6148	86.4492	219.566	220.918	1.58397	1.04272e-29	1.63134	8.38902e-115	1.7016	0	1.70035	0
Cre01.g005950	Cre01.g005950.t1.1				13.0046	15.918	10.2929	10.2459	24.491	25.189	8.02365	8.33322	-0.308634	0.251233	-1.26781	4.74151e-14	0.544253	0.001423	-0.406823	0.121266
Cre01.g007350	Cre01.g007350.t1.1	MOT42	predicted protein	identified by comparative genomics as being present only in organisms having motile (MOT) cilia	0.130894	0.510083	0.120013	0.117145	3.01154	2.26437	0.455369	0.34233	-0.245137	0.943288	-1.35606	0.00256383	1.37241	0.001498	0.478045	0.691619
Cre01.g007650	Cre01.g007650.t1.1				2.12006	1.74766	1.04667	0.145951	3.46346	3.66755	0.992854	0.56868	-0.766633	0.228955	-1.17943	0.008815	0.424597	0.411486	0.230296	1
Cre01.g008081	Cre01.g008081.t1.1				16.1814	18.4413	4.0123	4.55398	7.65476	9.1548	3.09791	2.6616	-1.6069	1.62925e-16	-1.10236	3.1471e-05	-1.12915	0	-0.562948	0.12449
Cre01.g008150	Cre01.g008150.t1.2				1.78997	1.5853	4.96079	4.66021	3.56387	2.63907	19.849	19.009	1.38138	1.2064e-10	2.75741	3.91443e-103	0.548697	0.055339	1.82322	0
Cre01.g008650	Cre01.g008650.t1.2				5.08398	5.11169	19.8406	19.1331	2.59547	2.05778	8.98505	7.6993	1.97486	6.5286e-73	1.95393	2.47341e-23	-1.20207	0	-1.31724	0
Cre01.g009150	Cre01.g009150.t1.2				9.01092	6.7131	20.4115	21.8213	5.1595	5.04324	21.2061	18.2524	1.23923	8.5656e-07	1.7857	1.18718e-11	-0.5657	0.145385	-0.19908	0.600251
Cre01.g009350	Cre01.g009350.t1.1	AIH2	agmatine iminohydrolase	converts agmatin to N-carbamoyl-putrescine; involved in agmatine pathway of polyamine (putrescine) biosynthesis; found in soluble mitochondrial proteome	0.616246	0.360218	1.46904	2.42667	1.96314	1.7057	4.39492	4.29781	0.983002	0.0215958	1.10838	0.00151285	0.832419	0.085085	0.805715	0.04615
Cre01.g009550	Cre01.g009550.t1.2				7.11748	7.12143	9.87686	8.78006	7.74516	5.98996	20.1601	21.9684	0.454399	0.0856583	1.74081	1.28051e-26	-0.228214	0.51902	0.996163	0
Cre01.g009600	Cre01.g009600.t1.2				0.563853	0.219728	0.72377	0.60555	3.09351	3.70661	7.1598	6.39016	0.355454	0.795351	1.03573	0.000226534	1.59079	2.9e-05	2.28698	0
Cre01.g009650	Cre01.g009650.t1.1	BUG25	basal body protein	Basal body protein of unknown function, found in basal body proteome [PMID: 15964273]. Transcript upregulated during flagellar regeneration.	0.245586	0.143554	1.03578	1.36269	0.738885	1.14708	4.74175	4.41035	1.39781	0.000144245	2.10388	3.01596e-17	1.04528	0.014216	1.54631	0
Cre01.g009800	Cre01.g009800.t1.1	FAP289	Flagellar Associated Coiled-Coil Protein	Flagellar Associated Protein, found in the flagellar proteome [PMID: 15998802]; transcript upregulated during flagellar regeneration [PMID: 15738400]	6.32208	8.0914	6.70577	4.65953	6.14288	6.32614	24.3658	21.6134	-0.170077	0.874332	1.93776	3.51758e-27	-0.331862	0.314449	1.74419	0
Cre01.g010700	Cre01.g010700.t1.1				42.4241	37.8612	80.4917	87.4367	38.2261	36.6952	98.303	97.1845	1.15973	3.15884e-29	1.59022	4.33323e-62	-0.286728	0.064489	0.09902	0.453381
Cre01.g010750	Cre01.g010750.t1.1				19.5518	18.5965	31.4349	31.3057	15.7024	15.9498	46.0174	47.095	0.834756	1.08334e-20	1.77239	1.73033e-114	-0.456762	5.4e-05	0.444793	0
Cre01.g010800	Cre01.g010800.t1.2				8.78189	9.76208	11.5616	11.8899	3.68629	3.99277	10.4775	10.1096	0.418281	0.113213	1.44155	9.51298e-10	-1.2064	1e-06	-0.283215	0.295468
Cre01.g010950	Cre01.g010950.t1.2				27.8791	27.8372	19.4668	18.5576	13.9593	13.087	28.6911	29.9262	-0.399471	0.00014832	1.33022	4.3209e-44	-1.20673	0	0.495383	0
Cre01.g011100	Cre01.g011100.t1.1	CAS1	cycloartenol synthase	similar to cycloartenol synthase; (S)-2,3-epoxysqualene mutase from Arabidopsis thaliana - possibly involved in sterol/ergosterol biosynthesis	16.4184	19.3188	26.0666	28.2425	23.2709	22.4392	44.1365	41.0803	0.713533	2.435e-09	1.11924	7.33873e-34	0.149613	0.425137	0.520629	0
Cre01.g011300	Cre01.g011300.t1.1				23.2459	29.5335	32.7803	35.6469	20.0892	18.4607	45.8738	44.2041	0.490936	0.00892784	1.40982	4.07227e-28	-0.602704	0.010568	0.269502	0.061907
Cre01.g012500	Cre01.g012500.t1.1	PRA1	prenylated rab acceptor family protein	Expressed Protein. Similar to Prenylated Rab Acceptor Protein	98.7382	98.9908	247.185	240.488	92.6511	95.149	216.897	222.318	1.42655	1.8136e-155	1.46004	1.81611e-165	-0.273682	0.000424	-0.269727	0
Cre01.g013000	Cre01.g013000.t1.2				3.71152	3.96577	4.88491	4.66103	5.66811	5.22972	10.8294	10.0721	0.382544	0.233365	1.10537	7.57632e-11	0.261196	0.411863	0.940801	0
Cre01.g013200	Cre01.g013200.t1.1				81.7624	77.328	126.177	127.273	64.2222	52.2862	152.289	151.046	0.790901	3.37147e-19	1.60288	6.76693e-81	-0.637559	2e-06	0.137685	0.149648
Cre01.g015250	Cre01.g015250.t1.1	POLD1	DNA polymerase delta subunit one	Homologous to eukaryotic DNA polymerase delta catalytic subunit; Replication polymerase. Class B polymerase.	0.470314	0.572739	0.26951	0.315684	2.18495	2.23742	0.306783	0.410006	-0.297881	0.812023	-1.5975	1.50439e-05	1.21351	0.000572	0.080738	1
Cre01.g015350	Cre01.g015350.t1.1	POR	Light-dependent protochlorophyllide reductase	Light-dependent protochlorophyllide reductase, chloroplast precursor; Converts protochlorophyllide to chlorophyllide using NADPH and light as the reductant; Chlamydomonas mutant known as pc-1 has a two-nucleotide deletion within the fourth and fifth codons of this gene giving rise to a premature termination [PMID: 8616232; identical to U36752]	55.9488	57.5479	50.6372	45.7738	133.76	141.546	46.6761	49.6119	-0.0942426	0.683188	-1.25337	6.59315e-63	1.05616	0	-0.11802	0.44358
Cre01.g015500	Cre01.g015500.t1.1				39.1702	36.4331	115.131	121.18	56.9137	56.6073	213.797	221.888	1.72114	4.09033e-72	2.15401	2.39959e-202	0.368054	0.007107	0.756117	0
Cre01.g016200	Cre01.g016200.t1.2				5.40605	5.45939	10.6991	11.2694	2.50859	2.45206	7.28202	7.12674	1.0312	1.1477e-08	1.56546	1.04108e-12	-1.10154	6e-06	-0.684043	0.000132
Cre01.g016300	Cre01.g016300.t1.1				46.6423	50.801	79.1629	75.6297	68.2872	62.7822	130.586	137.746	0.783876	2.6505e-16	1.26284	8.72165e-69	0.218133	0.077593	0.666012	0
Cre01.g016350	Cre01.g016350.t1.1				0.0904949	0	0.995662	0.566924	1.36134	1.01757	2.43988	3.15564	1.25703	0.0167998	1.06625	0.0036556	1.56563	0.001932	1.20118	0.002608
Cre01.g016400	Cre01.g016400.t1.2				5.03883	5.63086	2.78555	3.44847	8.26201	9.99867	2.96456	2.97154	-0.516754	0.103111	-1.21671	3.6585e-08	0.503411	0.026987	-0.153313	0.812373
Cre01.g016550	Cre01.g016550.t1.1				0	0.245024	0.230598	0.56272	0.667675	0.978946	2.29679	3.17922	0.57025	0.714405	1.23728	0.00253115	0.945412	0.196791	1.52592	0.000645
Cre01.g017200	Cre01.g017200.t1.1				2.94885	4.30926	7.32253	5.71804	2.60944	3.29458	5.23624	7.06949	0.751921	0.0172731	1.04577	0.000753015	-0.347843	0.425137	-0.179067	0.750294
Cre01.g017500	Cre01.g017500.t1.1				22.0713	20.669	20.3933	20.3654	32.4001	32.854	70.2365	67.2694	0.0645439	0.990171	1.27716	9.48043e-29	0.377775	0.048275	1.56875	0
Cre01.g017650	Cre01.g017650.t1.1	_	conserved protein of unknown function	homologue in Volvox is highly similar, except for central region	21.1083	18.2021	16.4766	15.317	19.9408	22.2055	37.5851	36.6788	-0.147298	0.742545	1.01675	2.4432e-13	-0.092978	0.806136	1.05034	0
Cre01.g018600	Cre01.g018600.t1.1				76.4519	80.5055	162.355	151.181	50.988	48.1373	117.339	117.37	1.09663	2.73194e-27	1.4394	5.3572e-36	-0.819859	0	-0.527103	0
Cre01.g018950	Cre01.g018950.t1.1	DHS1	deoxypusine synthase 1	transfers the aminobutyl moiety of spermidine to a specific lysine residue of eIF5A, forming deoxyhypusine (PMID: 17476569); deoxypusine will then be hydroxylated to generate the unusual aminoacid hypusine; an important mechanism controlling cell proliferation and growth (PMID: 16600425)	4.46435	6.83458	2.33898	2.28309	4.51486	5.37851	0.41601	1.38996	-0.740777	0.0467368	-1.49521	0.000273878	-0.279728	0.52005	-0.926685	0.09097
[truncated: 1,404 more rows]

## Sheet: C3(MockWTvssak1)
gene name	full gene name	Genename	Defline	Description	WT-mock 1	WT-mock 2	WT-RB 1	WT-RB 2	sak1-mock 1	sak1-mock 2	sak1-RB 1	sak1-RB 2	C1 folds	C1 fdr	C2 folds	C2 fdr	C3 folds	C3 fdr	C4 folds	C4 fdr
[truncated: 1,436 more rows]

[truncated: 2 more sheets: C4(RBWTvssak1), C1-4 All]
