# Supplementary material for: Phosphoprotein SAK1 is a regulator of acclimation to singlet oxygen in Chlamydomonas reinhardtii
Source: eLife journal article supplement (doi:10.7554/elife.02286), 2014-05-23
Supplement: supp [file elife_poa_e02286_Figure_2_figure_supplement_1_Fold_change_(FC)_values_obtained_by_RNA_seq_and_qRT_PCR.xlsx]

## Sheet: Sheet1
Figure 2-figure supplement 1 Fold change (FC) values obtained by RNA-seq and qRT-PCR
Gene ID		RNA-seq FCa		qRT-PCR FCb
v4	v5	WT	sak1	WT	sak1
Cre10.g458450.t1.2	Cre10.g458450.t1.3	15	4.2	28.9	2.9
Cre06.g281250.t1.1	Cre06.g281250.t1.2	60.5	2.2	147.4	1
Cre09.g398700.t1.1	Cre09.g398700.t1.2	16.6	1.1	15.6	0.7
Cre13.g566850.t1.1	Cre13.g566850.t1.2	46.1	2.5	104.7	1
Cre03.g177600.t1.2	Cre03.g177600.t1.3	2.5	1.1	3.8	2
Cre08.g380300.t1.2	Cre08.g380300.t1.2	10.9	1.6	13.2	0.8
Cre01.g007300.t1.1	Cre01.g007300.t1.2	7.2	0.4	10.2	0.5
Cre13.g564900.t1.1	Cre13.g564900.t1.2	9.3	1.3	8.5	0.9
Cre06.g263550.t1.1	Cre06.g263550.t1.2	22	3.4	91	5.3
Cre08.g358200.t1.2	Cre08.g358200.t1.3	2.1	0.6	1.7	0.7
Cre16.g683400.t1.1	Cre16.g683400.t1.2	5.3	1.1	4.2	0.7
Cre12.g503950.t1.1	Cre12.g503950.t1.2	9.4	1.2	7	1.2
Cre14.g623650.t1.2	Cre14.g623650.t1.2	29.6	3.2	89.4	2.8
Cre14.g613950.t1.1	Cre14.g613950.t1.2	12.6	2.6	19.8	3
Cre16.g688550.t1.1	Cre16.g688550.t1.2	3.6	5.5	4.4	8.8
Cre06.g298750.t1.1	Cre06.g298750.t1.2	0.1	0.2	0.2	0.5
a Calculated as described in Material and Methods
b Average of biological triplicate
